# Supplementary material for: Song Is More Memorable Than Speech Prosody: Discrete Pitches Aid Auditory Working Memory
Source: Front Psychol. 2020 Dec 10;11:586723. doi: 10.3389/fpsyg.2020.586723 (PMC7758421; doi:10.3389/fpsyg.2020.586723)
Supplement: Supplementary file 11 [file Table_2.XLSX]

## Sheet: Study 1
Trial_index	Reaction_Time	Response_string	Correct_response	Correctness	Subject	musicality	spectral_hearing	deviation	contour	variant	deviation_abs
0	1.755	same	same	CORRECT	3	46	0	0	contour071	Intermediate	0
1	1.663	same	same	CORRECT	3	46	0	0	contour157	Song	0
2	0.829	same	same	CORRECT	3	46	0	0	contour130	Song	0
3	1.256	diff	diff	CORRECT	3	46	0	-14.47	contour091	Intermediate	14.47
4	0.928	diff	same	INCORRECT	3	46	0	0	contour152	Song	0
5	0.89	diff	same	INCORRECT	3	46	0	0	contour085	Intermediate	0
6	1.447	same	same	CORRECT	3	46	0	0	contour016	Speech	0
7	0.997	diff	diff	CORRECT	3	46	0	9.38	contour038	Song	9.38
8	1.74	same	same	CORRECT	3	46	0	0	contour128	Song	0
9	1.029	diff	same	INCORRECT	3	46	0	0	contour035	Speech	0
10	1.841	diff	diff	CORRECT	3	46	0	17.35	contour198	Speech	17.35
11	1.482	same	same	CORRECT	3	46	0	0	contour017	Intermediate	0
12	2.228	same	diff	INCORRECT	3	46	0	-3.28	contour103	Speech	3.28
13	1.427	diff	diff	CORRECT	3	46	0	-2.92	contour197	Song	2.92
14	1.676	same	diff	INCORRECT	3	46	0	2.93	contour114	Song	2.93
15	1.163	same	same	CORRECT	3	46	0	0	contour083	Speech	0
16	1.273	diff	diff	CORRECT	3	46	0	12.24	contour160	Intermediate	12.24
17	1.156	diff	diff	CORRECT	3	46	0	-9.27	contour034	Speech	9.27
18	0.974	diff	diff	CORRECT	3	46	0	5.76	contour099	Speech	5.76
19	0.911	same	same	CORRECT	3	46	0	0	contour146	Intermediate	0
20	1.546	same	same	CORRECT	3	46	0	0	contour178	Speech	0
21	0.816	same	same	CORRECT	3	46	0	0	contour161	Song	0
22	4.419	diff	diff	CORRECT	3	46	0	-12.88	contour088	Intermediate	12.88
23	1.82	same	same	CORRECT	3	46	0	0	contour104	Intermediate	0
24	2.603	same	diff	INCORRECT	3	46	0	-9.14	contour135	Song	9.14
25	1.162	same	diff	INCORRECT	3	46	0	0	contour182	Intermediate	0
26	1.842	same	same	CORRECT	3	46	0	0	contour018	Speech	0
27	4.952	same	diff	INCORRECT	3	46	0	-14.08	contour077	Intermediate	14.08
28	1.59	same	same	CORRECT	3	46	0	0	contour090	Speech	0
29	0.736	diff	diff	CORRECT	3	46	0	6.29	contour082	Song	6.29
30	1.608	diff	diff	CORRECT	3	46	0	9.37	contour200	Song	9.37
31	1.279	diff	diff	CORRECT	3	46	0	-14.49	contour110	Intermediate	14.49
32	2.173	same	diff	INCORRECT	3	46	0	-5.3	contour174	Song	5.3
33	2.147	same	same	CORRECT	3	46	0	0	contour189	Song	0
34	1.3	diff	diff	CORRECT	3	46	0	-8.52	contour106	Intermediate	8.52
35	0.753	diff	same	INCORRECT	3	46	0	0	contour054	Intermediate	0
36	1.411	diff	diff	CORRECT	3	46	0	-12.1	contour124	Intermediate	12.1
37	1.151	same	diff	INCORRECT	3	46	0	5.73	contour004	Speech	5.73
38	0.951	same	same	CORRECT	3	46	0	0	contour118	Speech	0
39	1.896	same	same	CORRECT	3	46	0	0	contour057	Song	0
40	1.018	same	same	CORRECT	3	46	0	0	contour200	Speech	0
41	1.03	same	same	CORRECT	3	46	0	0	contour146	Speech	0
42	1.65	same	diff	INCORRECT	3	46	0	-6.59	contour178	Song	6.59
43	1.098	diff	diff	CORRECT	3	46	0	12.75	contour091	Speech	12.75
44	1.196	diff	diff	CORRECT	3	46	0	13.08	contour082	Speech	13.08
45	0.702	same	same	CORRECT	3	46	0	0	contour124	Speech	0
46	0.924	diff	diff	CORRECT	3	46	0	2.22	contour104	Speech	2.22
47	2.202	same	same	CORRECT	3	46	0	0	contour054	Speech	0
48	1.376	same	same	CORRECT	3	46	0	0	contour152	Intermediate	0
49	1.376	diff	diff	CORRECT	3	46	0	-3.36	contour197	Speech	3.36
50	1.654	same	diff	INCORRECT	3	46	0	2.19	contour038	Speech	2.19
51	1.637	same	diff	INCORRECT	3	46	0	-8.38	contour135	Speech	8.38
52	1.217	diff	diff	CORRECT	3	46	0	14.79	contour090	Song	14.79
53	1.27	same	same	CORRECT	3	46	0	0	contour157	Speech	0
54	1.45	same	same	CORRECT	3	46	0	0	contour189	Speech	0
55	1.144	same	same	CORRECT	3	46	0	0	contour110	Speech	0
56	4.462	same	same	CORRECT	3	46	0	0	contour128	Intermediate	0
57	0.784	diff	diff	CORRECT	3	46	0	-7.93	contour160	Speech	7.93
58	1.211	diff	diff	CORRECT	3	46	0	-2.92	contour035	Song	2.92
59	0.869	same	same	CORRECT	3	46	0	0	contour004	Song	0
60	1.587	same	same	CORRECT	3	46	0	0	contour103	Intermediate	0
61	1.215	same	same	CORRECT	3	46	0	0	contour085	Song	0
62	1.9	same	same	CORRECT	3	46	0	0	contour114	Speech	0
63	1.246	diff	diff	CORRECT	3	46	0	-6.28	contour018	Intermediate	6.28
64	1.247	diff	diff	CORRECT	3	46	0	5.85	contour106	Song	5.85
65	1.227	diff	diff	CORRECT	3	46	0	-8.55	contour077	Speech	8.55
66	1.288	diff	diff	CORRECT	3	46	0	12.18	contour161	Speech	12.18
67	1.197	same	same	CORRECT	3	46	0	0	contour071	Song	0
68	1.243	diff	same	INCORRECT	3	46	0	0	contour118	Intermediate	0
69	1.092	diff	diff	CORRECT	3	46	0	14.26	contour182	Speech	14.26
70	2.333	same	diff	INCORRECT	3	46	0	9.37	contour034	Song	9.37
71	1.039	same	same	CORRECT	3	46	0	0	contour016	Intermediate	0
72	1.761	same	diff	INCORRECT	3	46	0	-10.14	contour130	Speech	10.14
73	1.343	same	same	CORRECT	3	46	0	0	contour198	Intermediate	0
74	1.096	diff	diff	CORRECT	3	46	0	-6.67	contour174	Speech	6.67
75	0.986	same	same	CORRECT	3	46	0	0	contour017	Speech	0
76	0.911	same	same	CORRECT	3	46	0	0	contour088	Song	0
77	3.43	diff	diff	CORRECT	3	46	0	-2.93	contour099	Song	2.93
78	1.147	diff	same	INCORRECT	3	46	0	0.03	contour057	Intermediate	0.03
79	1.094	diff	diff	CORRECT	3	46	0	-2.93	contour083	Song	2.93
80	1.863	same	same	CORRECT	3	46	0	0	contour035	Intermediate	0
81	0.915	same	same	CORRECT	3	46	0	0	contour099	Intermediate	0
82	1.037	diff	diff	CORRECT	3	46	0	0	contour118	Song	0
83	1.177	diff	same	INCORRECT	3	46	0	0	contour146	Song	0
84	2.719	same	same	CORRECT	3	46	0	0	contour057	Speech	0
85	1.103	diff	diff	CORRECT	3	46	0	-6.21	contour083	Intermediate	6.21
86	1.136	diff	diff	CORRECT	3	46	0	2.75	contour114	Intermediate	2.75
87	1.483	same	same	CORRECT	3	46	0	0	contour088	Speech	0
88	0.927	diff	diff	CORRECT	3	46	0	-8.7	contour082	Intermediate	8.7
89	1.29	diff	diff	CORRECT	3	46	0	-3.08	contour200	Intermediate	3.08
90	0.788	diff	diff	CORRECT	3	46	0	7.03	contour152	Speech	7.03
91	3.056	diff	same	INCORRECT	3	46	0	0	contour090	Intermediate	0
92	0.987	same	same	CORRECT	3	46	0	0	contour091	Song	0
93	1.688	same	same	CORRECT	3	46	0	0	contour054	Song	0
94	1.252	same	same	CORRECT	3	46	0	0	contour103	Song	0
95	0.905	same	same	CORRECT	3	46	0	0	contour182	Song	0
96	0.871	diff	diff	CORRECT	3	46	0	-10.4	contour124	Song	10.4
97	0.828	same	same	CORRECT	3	46	0	0	contour157	Intermediate	0
98	0.842	same	same	CORRECT	3	46	0	0	contour197	Intermediate	0
99	1.264	same	diff	INCORRECT	3	46	0	2.21	contour130	Intermediate	2.21
100	0.987	diff	diff	CORRECT	3	46	0	-10.4	contour160	Song	10.4
101	1.013	diff	diff	CORRECT	3	46	0	2.23	contour189	Intermediate	2.23
102	1.212	same	same	CORRECT	3	46	0	0	contour077	Song	0
103	2.729	diff	diff	CORRECT	3	46	0	16.56	contour034	Intermediate	16.56
104	1.106	diff	diff	CORRECT	3	46	0	5.85	contour104	Song	5.85
105	0.896	diff	diff	CORRECT	3	46	0	5.67	contour178	Intermediate	5.67
106	1.193	diff	diff	CORRECT	3	46	0	12.32	contour174	Intermediate	12.32
107	0.948	same	diff	INCORRECT	3	46	0	5.15	contour085	Speech	5.15
108	1.133	diff	diff	CORRECT	3	46	0	-7.88	contour198	Song	7.88
109	4.105	diff	same	INCORRECT	3	46	0	0	contour128	Speech	0
110	0.771	same	same	CORRECT	3	46	0	0	contour016	Song	0
111	1.204	same	diff	INCORRECT	3	46	0	-10.11	contour004	Intermediate	10.11
112	0.996	same	same	CORRECT	3	46	0	0	contour161	Intermediate	0
113	1.231	same	same	CORRECT	3	46	0	0	contour038	Intermediate	0
114	1.06	same	same	CORRECT	3	46	0	0	contour017	Song	0
115	1.174	same	same	CORRECT	3	46	0	0	contour106	Speech	0
116	1.816	diff	diff	CORRECT	3	46	0	5.85	contour110	Song	5.85
117	1.084	diff	diff	CORRECT	3	46	0	-4.57	contour071	Speech	4.57
118	1.042	same	same	CORRECT	3	46	0	0	contour018	Song	0
119	0.751	diff	diff	CORRECT	3	46	0	-9.9	contour135	Intermediate	9.9
0	1.841	same	same	CORRECT	4	82	0	0	contour133	Song	0
1	1.998	diff	diff	CORRECT	4	82	0	-10.4	contour124	Song	10.4
2	1.121	same	diff	INCORRECT	4	82	0	9.38	contour163	Song	9.38
3	1.076	diff	diff	CORRECT	4	82	0	2.93	contour165	Song	2.93
4	1.728	same	same	CORRECT	4	82	0	0	contour130	Intermediate	0
5	1.355	diff	same	INCORRECT	4	82	0	0	contour042	Speech	0
6	1.149	same	same	CORRECT	4	82	0	0	contour110	Speech	0
7	1.51	same	same	CORRECT	4	82	0	0	contour113	Intermediate	0
8	1.427	diff	diff	CORRECT	4	82	0	-2.92	contour039	Song	2.92
9	2.59	same	diff	INCORRECT	4	82	0	-8.57	contour071	Intermediate	8.57
10	1.44	same	diff	INCORRECT	4	82	0	-14.63	contour077	Song	14.63
11	1.497	diff	diff	CORRECT	4	82	0	16.31	contour060	Intermediate	16.31
12	1.885	diff	same	INCORRECT	4	82	0	0	contour011	Intermediate	0
13	1.335	same	same	CORRECT	4	82	0	0	contour037	Song	0
14	1.292	diff	same	INCORRECT	4	82	0	0	contour189	Intermediate	0
15	1.482	same	diff	INCORRECT	4	82	0	18.27	contour069	Intermediate	18.27
16	7.25	diff	diff	CORRECT	4	82	0	-3.36	contour197	Speech	3.36
17	1.146	diff	same	INCORRECT	4	82	0	0	contour093	Speech	0
18	1.945	same	same	CORRECT	4	82	0	0	contour088	Song	0
19	1.573	same	diff	INCORRECT	4	82	0	0.04	contour085	Intermediate	0.04
20	1.197	diff	diff	CORRECT	4	82	0	6.29	contour025	Song	6.29
21	1.069	same	diff	INCORRECT	4	82	0	4.03	contour017	Speech	4.03
22	1.392	same	diff	INCORRECT	4	82	0	5.85	contour059	Song	5.85
23	1.096	same	same	CORRECT	4	82	0	0	contour083	Speech	0
24	1.778	same	diff	INCORRECT	4	82	0	13.5	contour178	Speech	13.5
25	1.095	same	diff	INCORRECT	4	82	0	12.76	contour091	Speech	12.76
26	1.141	same	diff	INCORRECT	4	82	0	-2.43	contour095	Speech	2.43
27	0.844	same	same	CORRECT	4	82	0	0	contour182	Speech	0
28	2.591	diff	same	INCORRECT	4	82	0	0	contour027	Speech	0
29	1.136	diff	diff	CORRECT	4	82	0	2.82	contour052	Intermediate	2.82
30	1.362	same	same	CORRECT	4	82	0	0	contour131	Speech	0
31	1.591	same	diff	INCORRECT	4	82	0	-8.83	contour048	Speech	8.83
32	2.117	same	same	CORRECT	4	82	0	0	contour057	Intermediate	0
33	1.04	same	same	CORRECT	4	82	0	0	contour018	Song	0
34	1.336	same	same	CORRECT	4	82	0	0	contour135	Speech	0
35	1.216	same	same	CORRECT	4	82	0	0	contour118	Song	0
36	1.331	same	same	CORRECT	4	82	0	0	contour075	Song	0
37	2.096	same	same	CORRECT	4	82	0	0	contour054	Speech	0
38	1.361	same	diff	INCORRECT	4	82	0	-5.71	contour186	Speech	5.71
39	4.697	diff	diff	CORRECT	4	82	0	2.19	contour038	Speech	2.19
40	2.378	diff	diff	CORRECT	4	82	0	11.15	contour042	Intermediate	11.15
41	1.472	diff	diff	CORRECT	4	82	0	14.9	contour059	Intermediate	14.9
42	3.89	diff	diff	CORRECT	4	82	0	-9.04	contour165	Intermediate	9.04
43	1.166	same	diff	INCORRECT	4	82	0	-8.9	contour163	Speech	8.9
44	3.169	same	same	CORRECT	4	82	0	0	contour027	Song	0
45	4.252	diff	diff	CORRECT	4	82	0	-11.38	contour118	Intermediate	11.38
46	7.493	same	diff	INCORRECT	4	82	0	5.74	contour037	Speech	5.74
47	4.744	same	same	CORRECT	4	82	0	0	contour039	Intermediate	0
48	1.685	diff	diff	CORRECT	4	82	0	-14.4	contour091	Intermediate	14.4
49	1.098	diff	same	INCORRECT	4	82	0	0	contour130	Song	0
50	1.646	diff	same	INCORRECT	4	82	0	0	contour085	Song	0
51	3.884	same	diff	INCORRECT	4	82	0	0	contour186	Song	0
52	3.317	diff	diff	CORRECT	4	82	0	-10.32	contour131	Intermediate	10.32
53	6.755	same	same	CORRECT	4	82	0	0	contour057	Speech	0
54	1.646	same	same	CORRECT	4	82	0	0	contour110	Intermediate	0
55	3.342	diff	diff	CORRECT	4	82	0	4.71	contour113	Speech	4.71
56	7.367	diff	same	INCORRECT	4	82	0	0	contour060	Speech	0
57	3.213	same	same	CORRECT	4	82	0	0	contour018	Intermediate	0
58	5.697	same	same	CORRECT	4	82	0	0	contour069	Song	0
59	2.153	same	same	CORRECT	4	82	0	0	contour133	Speech	0
60	4.98	diff	same	INCORRECT	4	82	0	0	contour025	Intermediate	0
61	3.709	diff	same	INCORRECT	4	82	0	0	contour048	Intermediate	0
62	1.133	diff	diff	CORRECT	4	82	0	-8.91	contour088	Speech	8.91
63	0.725	same	same	CORRECT	4	82	0	0	contour083	Intermediate	0
64	0.976	diff	diff	CORRECT	4	82	0	-2.92	contour197	Song	2.92
65	0.861	same	diff	INCORRECT	4	82	0	-4.63	contour071	Speech	4.63
66	1.057	same	same	CORRECT	4	82	0	0	contour093	Intermediate	0
67	1.092	diff	same	INCORRECT	4	82	0	0	contour135	Song	0
68	1.084	diff	same	INCORRECT	4	82	0	0	contour017	Song	0
69	1.252	diff	diff	CORRECT	4	82	0	-14.09	contour077	Intermediate	14.09
70	0.852	same	same	CORRECT	4	82	0	0	contour075	Speech	0
71	0.823	diff	diff	CORRECT	4	82	0	13.16	contour054	Intermediate	13.16
72	1.345	same	same	CORRECT	4	82	0	0	contour189	Song	0
73	1.018	same	same	CORRECT	4	82	0	0	contour182	Song	0
74	1.189	diff	diff	CORRECT	4	82	0	-1.59	contour011	Speech	1.59
75	1.268	same	diff	INCORRECT	4	82	0	-6.59	contour178	Song	6.59
76	0.899	same	diff	INCORRECT	4	82	0	2.92	contour052	Song	2.92
77	1.43	same	diff	INCORRECT	4	82	0	2.93	contour095	Song	2.93
78	1.114	same	same	CORRECT	4	82	0	0	contour038	Intermediate	0
79	1.514	same	diff	INCORRECT	4	82	0	5.75	contour124	Speech	5.75
80	16.777	diff	same	INCORRECT	4	82	0	0	contour054	Song	0
81	2.445	diff	diff	CORRECT	4	82	0	-3.63	contour189	Speech	3.63
82	6.127	same	diff	INCORRECT	4	82	0	-7.88	contour071	Song	7.88
83	0.961	same	diff	INCORRECT	4	82	0	8.64	contour059	Speech	8.64
84	1.069	diff	diff	CORRECT	4	82	0	5.15	contour085	Speech	5.15
85	1.083	diff	same	INCORRECT	4	82	0	0	contour095	Intermediate	0
86	1.015	same	diff	INCORRECT	4	82	0	6.53	contour118	Speech	6.53
87	1.591	same	same	CORRECT	4	82	0	0	contour025	Speech	0
88	0.86	diff	same	INCORRECT	4	82	0	0	contour069	Speech	0
89	5.934	diff	same	INCORRECT	4	82	0	0	contour042	Song	0
90	1.808	same	diff	INCORRECT	4	82	0	-8.55	contour077	Speech	8.55
91	1.709	same	same	CORRECT	4	82	0	0	contour130	Speech	0
92	1.545	same	diff	INCORRECT	4	82	0	-9.62	contour060	Song	9.62
93	3.061	diff	same	INCORRECT	4	82	0	0	contour048	Song	0
94	2.485	diff	same	INCORRECT	4	82	0	0	contour011	Song	0
95	1.482	same	diff	INCORRECT	4	82	0	5.67	contour178	Intermediate	5.67
96	5.038	diff	same	INCORRECT	4	82	0	0	contour075	Intermediate	0
97	2.58	same	same	CORRECT	4	82	0	0	contour052	Speech	0
98	6.837	diff	diff	CORRECT	4	82	0	18.33	contour027	Intermediate	18.33
99	2.649	same	diff	INCORRECT	4	82	0	-12.1	contour124	Intermediate	12.1
100	1.601	same	same	CORRECT	4	82	0	0	contour163	Intermediate	0
101	1.296	diff	same	INCORRECT	4	82	0	0	contour017	Intermediate	0
102	3.255	same	diff	INCORRECT	4	82	0	2.42	contour165	Speech	2.42
103	8.453	same	diff	INCORRECT	4	82	0	-3.04	contour197	Intermediate	3.04
104	1.715	same	diff	INCORRECT	4	82	0	0	contour182	Intermediate	0
105	0.945	diff	diff	CORRECT	4	82	0	9.38	contour038	Song	9.38
106	5.276	diff	diff	CORRECT	4	82	0	5.85	contour110	Song	5.85
107	4.165	same	same	CORRECT	4	82	0	0	contour113	Song	0
108	4.817	same	same	CORRECT	4	82	0	0	contour057	Song	0
109	3.615	diff	same	INCORRECT	4	82	0	0	contour088	Intermediate	0
110	4.509	same	same	CORRECT	4	82	0	0	contour133	Intermediate	0
111	1.868	same	same	CORRECT	4	82	0	0	contour186	Intermediate	0
112	1.097	same	diff	INCORRECT	4	82	0	-3.4	contour039	Speech	3.4
113	4.637	diff	diff	CORRECT	4	82	0	-11.21	contour131	Song	11.21
114	3.113	diff	same	INCORRECT	4	82	0	0	contour135	Intermediate	0
115	1.751	same	same	CORRECT	4	82	0	0	contour037	Intermediate	0
116	1.86	same	diff	INCORRECT	4	82	0	9.15	contour018	Speech	9.15
117	3.427	same	same	CORRECT	4	82	0	0	contour091	Song	0
118	2.382	diff	diff	CORRECT	4	82	0	-2.93	contour083	Song	2.93
119	1.626	same	diff	INCORRECT	4	82	0	-7.88	contour093	Song	7.88
0	2.03	same	same	CORRECT	5	74	-0.833333	0	contour083	Song	0
1	2.839	same	same	CORRECT	5	74	-0.833333	0	contour095	Intermediate	0
2	1.828	same	diff	INCORRECT	5	74	-0.833333	-6.42	contour032	Speech	6.42
3	6.381	same	diff	INCORRECT	5	74	-0.833333	9.38	contour150	Song	9.38
4	3.238	diff	same	INCORRECT	5	74	-0.833333	0	contour075	Intermediate	0
5	1.449	diff	same	INCORRECT	5	74	-0.833333	0	contour160	Speech	0
6	1.466	diff	same	INCORRECT	5	74	-0.833333	0	contour060	Intermediate	0
7	2.652	diff	diff	CORRECT	5	74	-0.833333	-2.92	contour086	Song	2.92
8	3.029	diff	diff	CORRECT	5	74	-0.833333	13.16	contour054	Intermediate	13.16
9	3.398	diff	diff	CORRECT	5	74	-0.833333	0	contour022	Song	0
10	3.444	same	diff	INCORRECT	5	74	-0.833333	0.04	contour085	Intermediate	0.04
11	1.053	same	same	CORRECT	5	74	-0.833333	0	contour038	Intermediate	0
12	1.193	diff	diff	CORRECT	5	74	-0.833333	11.43	contour137	Speech	11.43
13	1.278	diff	diff	CORRECT	5	74	-0.833333	16.36	contour164	Song	16.36
14	4.209	diff	same	INCORRECT	5	74	-0.833333	0	contour052	Song	0
15	1.51	same	same	CORRECT	5	74	-0.833333	0	contour004	Intermediate	0
16	1.111	same	diff	INCORRECT	5	74	-0.833333	-5.84	contour113	Song	5.84
17	1.497	diff	same	INCORRECT	5	74	-0.833333	0	contour091	Song	0
18	1.034	diff	diff	CORRECT	5	74	-0.833333	9.37	contour018	Song	9.37
19	3.844	diff	diff	CORRECT	5	74	-0.833333	-8.78	contour117	Song	8.78
20	1.825	diff	diff	CORRECT	5	74	-0.833333	9.59	contour152	Intermediate	9.59
21	9.112	same	diff	INCORRECT	5	74	-0.833333	12.19	contour119	Intermediate	12.19
22	2.516	diff	same	INCORRECT	5	74	-0.833333	0	contour118	Song	0
23	1.861	same	diff	INCORRECT	5	74	-0.833333	6.23	contour096	Speech	6.23
24	1.373	same	same	CORRECT	5	74	-0.833333	0	contour197	Intermediate	0
25	0.834	same	diff	INCORRECT	5	74	-0.833333	-3.63	contour189	Speech	3.63
26	0.941	same	same	CORRECT	5	74	-0.833333	0	contour161	Intermediate	0
27	0.825	same	same	CORRECT	5	74	-0.833333	0	contour171	Song	0
28	0.866	same	same	CORRECT	5	74	-0.833333	0	contour174	Song	0
29	1.132	diff	diff	CORRECT	5	74	-0.833333	5.75	contour124	Speech	5.75
30	0.959	diff	diff	CORRECT	5	74	-0.833333	-10.4	contour147	Song	10.4
31	2.358	diff	diff	CORRECT	5	74	-0.833333	-14.5	contour110	Intermediate	14.5
32	1.006	diff	diff	CORRECT	5	74	-0.833333	14.63	contour182	Song	14.63
33	0.843	same	same	CORRECT	5	74	-0.833333	0	contour047	Speech	0
34	0.786	same	same	CORRECT	5	74	-0.833333	0	contour114	Song	0
35	0.904	same	same	CORRECT	5	74	-0.833333	0	contour008	Intermediate	0
36	3.516	diff	diff	CORRECT	5	74	-0.833333	2.6	contour157	Intermediate	2.6
37	3.029	diff	same	INCORRECT	5	74	-0.833333	0	contour162	Song	0
38	0.767	same	same	CORRECT	5	74	-0.833333	0	contour131	Song	0
39	0.812	diff	same	INCORRECT	5	74	-0.833333	0	contour053	Speech	0
40	3.759	same	same	CORRECT	5	74	-0.833333	0	contour095	Speech	0
41	2.226	diff	same	INCORRECT	5	74	-0.833333	0	contour147	Intermediate	0
42	1.897	same	diff	INCORRECT	5	74	-0.833333	-10.33	contour131	Intermediate	10.33
43	2.468	same	diff	INCORRECT	5	74	-0.833333	-12.23	contour052	Speech	12.23
44	2.163	same	same	CORRECT	5	74	-0.833333	0	contour160	Song	0
45	0.882	same	same	CORRECT	5	74	-0.833333	0	contour022	Speech	0
46	1.139	same	diff	INCORRECT	5	74	-0.833333	-6.67	contour174	Speech	6.67
47	1.949	same	same	CORRECT	5	74	-0.833333	0	contour162	Speech	0
48	0.807	diff	same	INCORRECT	5	74	-0.833333	0	contour004	Song	0
49	0.76	diff	diff	CORRECT	5	74	-0.833333	19.02	contour053	Song	19.02
50	0.73	same	same	CORRECT	5	74	-0.833333	0	contour008	Song	0
51	2.525	same	diff	INCORRECT	5	74	-0.833333	-6.21	contour083	Intermediate	6.21
52	0.828	same	diff	INCORRECT	5	74	-0.833333	-3.37	contour114	Speech	3.37
53	0.793	same	same	CORRECT	5	74	-0.833333	0	contour189	Intermediate	0
54	0.874	diff	diff	CORRECT	5	74	-0.833333	-4.85	contour110	Speech	4.85
55	0.999	same	diff	INCORRECT	5	74	-0.833333	0	contour161	Song	0
56	0.623	diff	same	INCORRECT	5	74	-0.833333	0	contour171	Speech	0
57	0.774	diff	diff	CORRECT	5	74	-0.833333	14.79	contour096	Song	14.79
58	0.968	diff	diff	CORRECT	5	74	-0.833333	-3.34	contour197	Speech	3.34
59	1.604	diff	same	INCORRECT	5	74	-0.833333	0	contour182	Speech	0
60	1.178	diff	diff	CORRECT	5	74	-0.833333	5.58	contour113	Intermediate	5.58
61	0.848	same	same	CORRECT	5	74	-0.833333	0	contour164	Intermediate	0
62	0.944	same	same	CORRECT	5	74	-0.833333	0	contour117	Intermediate	0
63	0.749	same	same	CORRECT	5	74	-0.833333	0	contour119	Song	0
64	4.318	same	same	CORRECT	5	74	-0.833333	0	contour118	Speech	0
65	2.969	diff	diff	CORRECT	5	74	-0.833333	9.75	contour086	Speech	9.75
66	2.273	diff	diff	CORRECT	5	74	-0.833333	-14.41	contour091	Intermediate	14.41
67	2.344	same	same	CORRECT	5	74	-0.833333	0	contour152	Song	0
68	2.811	same	diff	INCORRECT	5	74	-0.833333	-2.93	contour137	Song	2.93
69	0.878	same	diff	INCORRECT	5	74	-0.833333	5.84	contour085	Song	5.84
70	1.062	same	diff	INCORRECT	5	74	-0.833333	2.41	contour075	Speech	2.41
71	0.714	same	same	CORRECT	5	74	-0.833333	0	contour047	Intermediate	0
72	0.824	diff	diff	CORRECT	5	74	-0.833333	-12.34	contour054	Song	12.34
73	2.295	same	diff	INCORRECT	5	74	-0.833333	9.25	contour032	Intermediate	9.25
74	1.651	diff	same	INCORRECT	5	74	-0.833333	0	contour157	Song	0
75	1.342	diff	diff	CORRECT	5	74	-0.833333	9.38	contour038	Song	9.38
76	1.639	same	same	CORRECT	5	74	-0.833333	0	contour018	Speech	0
77	0.897	diff	same	INCORRECT	5	74	-0.833333	0	contour150	Speech	0
78	1.228	diff	diff	CORRECT	5	74	-0.833333	-9.62	contour060	Song	9.62
79	0.769	same	same	CORRECT	5	74	-0.833333	0	contour124	Song	0
80	1.183	same	diff	INCORRECT	5	74	-0.833333	4.71	contour113	Speech	4.71
81	0.964	diff	same	INCORRECT	5	74	-0.833333	0	contour022	Intermediate	0
82	0.852	diff	diff	CORRECT	5	74	-0.833333	7.45	contour119	Speech	7.45
83	2.443	same	diff	INCORRECT	5	74	-0.833333	-8.6	contour171	Intermediate	8.6
84	1.407	same	same	CORRECT	5	74	-0.833333	0	contour095	Song	0
85	0.845	diff	same	INCORRECT	5	74	-0.833333	0	contour162	Intermediate	0
86	3.559	same	diff	INCORRECT	5	74	-0.833333	2.82	contour052	Intermediate	2.82
87	1.226	same	same	CORRECT	5	74	-0.833333	0	contour124	Intermediate	0
88	3.731	diff	same	INCORRECT	5	74	-0.833333	0	contour182	Intermediate	0
89	1.204	same	diff	INCORRECT	5	74	-0.833333	-6.09	contour086	Intermediate	6.09
90	4.45	diff	diff	CORRECT	5	74	-0.833333	12.24	contour160	Intermediate	12.24
91	1.455	diff	same	INCORRECT	5	74	-0.833333	0	contour110	Song	0
92	0.736	same	diff	INCORRECT	5	74	-0.833333	-6.89	contour147	Speech	6.89
93	0.701	same	same	CORRECT	5	74	-0.833333	0	contour137	Intermediate	0
94	2.335	same	same	CORRECT	5	74	-0.833333	0	contour008	Speech	0
95	1.231	diff	diff	CORRECT	5	74	-0.833333	2.92	contour032	Song	2.92
96	1.853	same	diff	INCORRECT	5	74	-0.833333	-1.98	contour054	Speech	1.98
97	1.512	same	same	CORRECT	5	74	-0.833333	0	contour164	Speech	0
98	1.47	diff	diff	CORRECT	5	74	-0.833333	10.01	contour189	Song	10.01
99	0.918	same	diff	INCORRECT	5	74	-0.833333	2.19	contour038	Speech	2.19
100	1.182	same	same	CORRECT	5	74	-0.833333	0	contour114	Intermediate	0
101	0.776	same	same	CORRECT	5	74	-0.833333	0	contour075	Song	0
102	1.219	same	same	CORRECT	5	74	-0.833333	0	contour157	Speech	0
103	2.172	same	diff	INCORRECT	5	74	-0.833333	-6.86	contour060	Speech	6.86
104	1.004	diff	diff	CORRECT	5	74	-0.833333	12.32	contour174	Intermediate	12.32
105	1.877	diff	diff	CORRECT	5	74	-0.833333	7.03	contour152	Speech	7.03
106	3.52	same	diff	INCORRECT	5	74	-0.833333	-6.28	contour018	Intermediate	6.28
107	1.487	same	diff	INCORRECT	5	74	-0.833333	-2.93	contour197	Song	2.93
108	0.941	same	same	CORRECT	5	74	-0.833333	0	contour161	Speech	0
109	1.446	same	same	CORRECT	5	74	-0.833333	0	contour117	Speech	0
110	1.865	same	diff	INCORRECT	5	74	-0.833333	5.73	contour004	Speech	5.73
111	1.287	same	same	CORRECT	5	74	-0.833333	0	contour085	Speech	0
112	1.166	diff	diff	CORRECT	5	74	-0.833333	-9.65	contour053	Intermediate	9.65
113	0.951	diff	diff	CORRECT	5	74	-0.833333	12.78	contour091	Speech	12.78
114	0.793	same	same	CORRECT	5	74	-0.833333	0	contour047	Song	0
115	2.301	diff	same	INCORRECT	5	74	-0.833333	0	contour096	Intermediate	0
116	0.906	same	same	CORRECT	5	74	-0.833333	0	contour131	Speech	0
117	2.061	diff	same	INCORRECT	5	74	-0.833333	0	contour118	Intermediate	0
118	1.303	diff	diff	CORRECT	5	74	-0.833333	13.82	contour150	Intermediate	13.82
119	1.535	same	same	CORRECT	5	74	-0.833333	0	contour083	Speech	0
0	3.028	same	diff	INCORRECT	6	75	-0.333333	-8.6	contour171	Intermediate	8.6
1	1.027	same	same	CORRECT	6	75	-0.333333	0	contour038	Speech	0
2	1.497	diff	same	INCORRECT	6	75	-0.333333	0	contour010	Speech	0
3	1.269	same	diff	INCORRECT	6	75	-0.333333	-1.73	contour155	Speech	1.73
4	2.971	same	diff	INCORRECT	6	75	-0.333333	-6.42	contour032	Speech	6.42
5	2.776	same	same	CORRECT	6	75	-0.333333	0	contour182	Speech	0
6	1.376	diff	diff	CORRECT	6	75	-0.333333	-6.45	contour164	Speech	6.45
7	1.149	same	same	CORRECT	6	75	-0.333333	0	contour003	Intermediate	0
8	0.948	same	same	CORRECT	6	75	-0.333333	0	contour005	Song	0
9	0.778	diff	diff	CORRECT	6	75	-0.333333	17.35	contour198	Speech	17.35
10	0.696	same	same	CORRECT	6	75	-0.333333	0	contour075	Intermediate	0
11	2.549	diff	diff	CORRECT	6	75	-0.333333	12.75	contour091	Speech	12.75
12	2.106	same	diff	INCORRECT	6	75	-0.333333	2.61	contour157	Intermediate	2.61
13	0.66	diff	diff	CORRECT	6	75	-0.333333	2.3	contour069	Song	2.3
14	1.723	same	diff	INCORRECT	6	75	-0.333333	2.73	contour104	Intermediate	2.73
15	1.66	same	same	CORRECT	6	75	-0.333333	0	contour046	Intermediate	0
16	1.713	same	same	CORRECT	6	75	-0.333333	0	contour113	Speech	0
17	1.471	same	same	CORRECT	6	75	-0.333333	0	contour052	Speech	0
18	2.425	same	same	CORRECT	6	75	-0.333333	0	contour078	Song	0
19	1.726	same	same	CORRECT	6	75	-0.333333	0	contour065	Intermediate	0
20	1.809	diff	diff	CORRECT	6	75	-0.333333	10.01	contour189	Song	10.01
21	1.665	same	same	CORRECT	6	75	-0.333333	0	contour194	Speech	0
22	2.007	diff	diff	CORRECT	6	75	-0.333333	-10.4	contour147	Song	10.4
23	1.937	same	diff	INCORRECT	6	75	-0.333333	5.31	contour083	Speech	5.31
24	1.698	diff	diff	CORRECT	6	75	-0.333333	-12.1	contour124	Intermediate	12.1
25	1.82	same	same	CORRECT	6	75	-0.333333	0	contour077	Speech	0
26	2.188	diff	diff	CORRECT	6	75	-0.333333	-2.92	contour042	Song	2.92
27	0.953	diff	diff	CORRECT	6	75	-0.333333	14.62	contour117	Intermediate	14.62
28	1.933	same	same	CORRECT	6	75	-0.333333	0	contour123	Speech	0
29	0.696	same	same	CORRECT	6	75	-0.333333	0	contour049	Intermediate	0
30	2.098	diff	diff	CORRECT	6	75	-0.333333	17.54	contour048	Song	17.54
31	2.145	diff	diff	CORRECT	6	75	-0.333333	14.79	contour090	Song	14.79
32	2.104	diff	diff	CORRECT	6	75	-0.333333	-9.89	contour135	Intermediate	9.89
33	3.595	same	same	CORRECT	6	75	-0.333333	0	contour106	Speech	0
34	2.314	same	same	CORRECT	6	75	-0.333333	0	contour085	Intermediate	0
35	2.155	same	diff	INCORRECT	6	75	-0.333333	0	contour064	Intermediate	0
36	1.841	same	same	CORRECT	6	75	-0.333333	0	contour039	Song	0
37	2.518	same	same	CORRECT	6	75	-0.333333	0	contour119	Song	0
38	2.031	same	same	CORRECT	6	75	-0.333333	0	contour161	Intermediate	0
39	0.952	diff	diff	CORRECT	6	75	-0.333333	14.24	contour068	Speech	14.24
40	1.261	same	same	CORRECT	6	75	-0.333333	0	contour038	Song	0
41	3.107	diff	diff	CORRECT	6	75	-0.333333	0	contour182	Intermediate	0
42	1.566	same	same	CORRECT	6	75	-0.333333	0	contour078	Speech	0
43	1.144	same	same	CORRECT	6	75	-0.333333	0	contour091	Song	0
44	1.32	same	diff	INCORRECT	6	75	-0.333333	2.93	contour157	Song	2.93
45	0.899	same	same	CORRECT	6	75	-0.333333	0	contour049	Song	0
46	0.786	same	diff	INCORRECT	6	75	-0.333333	8.47	contour068	Intermediate	8.47
47	1.168	same	same	CORRECT	6	75	-0.333333	0	contour005	Intermediate	0
48	0.945	diff	diff	CORRECT	6	75	-0.333333	18.27	contour069	Intermediate	18.27
49	1.11	diff	diff	CORRECT	6	75	-0.333333	16.36	contour164	Song	16.36
50	1.404	same	diff	INCORRECT	6	75	-0.333333	0	contour064	Song	0
51	2.793	diff	diff	CORRECT	6	75	-0.333333	11.15	contour042	Intermediate	11.15
52	1.537	same	same	CORRECT	6	75	-0.333333	0	contour113	Intermediate	0
53	3.981	same	diff	INCORRECT	6	75	-0.333333	-6.21	contour083	Intermediate	6.21
54	1.915	same	diff	INCORRECT	6	75	-0.333333	-6.89	contour147	Speech	6.89
55	5.538	same	diff	INCORRECT	6	75	-0.333333	12.18	contour161	Speech	12.18
56	1.145	same	same	CORRECT	6	75	-0.333333	0	contour104	Song	0
57	0.859	diff	same	INCORRECT	6	75	-0.333333	0	contour065	Speech	0
58	1.467	same	diff	INCORRECT	6	75	-0.333333	2.76	contour039	Intermediate	2.76
59	5.654	same	diff	INCORRECT	6	75	-0.333333	5.75	contour124	Speech	5.75
60	1.612	diff	diff	CORRECT	6	75	-0.333333	-13.95	contour090	Intermediate	13.95
61	2.133	same	same	CORRECT	6	75	-0.333333	0	contour003	Song	0
62	1.579	same	same	CORRECT	6	75	-0.333333	0	contour077	Intermediate	0
63	1.316	diff	diff	CORRECT	6	75	-0.333333	12.34	contour194	Intermediate	12.34
64	1.258	same	diff	INCORRECT	6	75	-0.333333	5.78	contour171	Speech	5.78
65	3.097	diff	diff	CORRECT	6	75	-0.333333	2.92	contour032	Song	2.92
66	1.199	same	same	CORRECT	6	75	-0.333333	0	contour010	Song	0
67	1.081	same	same	CORRECT	6	75	-0.333333	0	contour046	Speech	0
68	0.837	diff	diff	CORRECT	6	75	-0.333333	8.58	contour048	Intermediate	8.58
69	3.16	diff	diff	CORRECT	6	75	-0.333333	5.85	contour106	Song	5.85
70	1.131	same	same	CORRECT	6	75	-0.333333	0	contour075	Song	0
71	1.688	same	same	CORRECT	6	75	-0.333333	0	contour198	Song	0
72	0.867	diff	diff	CORRECT	6	75	-0.333333	12.44	contour155	Song	12.44
73	0.834	same	same	CORRECT	6	75	-0.333333	0	contour052	Intermediate	0
74	1.38	same	diff	INCORRECT	6	75	-0.333333	2.23	contour189	Intermediate	2.23
75	1.709	same	same	CORRECT	6	75	-0.333333	0	contour117	Song	0
76	1.043	same	same	CORRECT	6	75	-0.333333	0	contour135	Speech	0
77	2.439	same	same	CORRECT	6	75	-0.333333	0	contour123	Intermediate	0
78	3.165	same	same	CORRECT	6	75	-0.333333	0	contour085	Speech	0
79	1.624	same	same	CORRECT	6	75	-0.333333	0	contour119	Intermediate	0
80	1.698	diff	diff	CORRECT	6	75	-0.333333	-8.83	contour048	Speech	8.83
81	1.528	diff	diff	CORRECT	6	75	-0.333333	-8.47	contour157	Speech	8.47
82	1.127	diff	diff	CORRECT	6	75	-0.333333	9.25	contour032	Intermediate	9.25
83	0.706	same	same	CORRECT	6	75	-0.333333	0	contour124	Song	0
84	1.584	same	same	CORRECT	6	75	-0.333333	0	contour077	Song	0
85	1.303	diff	diff	CORRECT	6	75	-0.333333	-5.05	contour042	Speech	5.05
86	3.373	same	same	CORRECT	6	75	-0.333333	0	contour182	Song	0
87	1.148	same	diff	INCORRECT	6	75	-0.333333	-1.25	contour064	Speech	1.25
88	1.588	same	same	CORRECT	6	75	-0.333333	0	contour147	Intermediate	0
89	1.553	same	diff	INCORRECT	6	75	-0.333333	5.84	contour085	Song	5.84
90	1.195	same	same	CORRECT	6	75	-0.333333	0	contour083	Song	0
91	1.46	same	same	CORRECT	6	75	-0.333333	0	contour069	Speech	0
92	1.683	same	diff	INCORRECT	6	75	-0.333333	-8.24	contour049	Speech	8.24
93	1.125	same	same	CORRECT	6	75	-0.333333	0	contour155	Intermediate	0
94	0.93	same	same	CORRECT	6	75	-0.333333	0	contour038	Intermediate	0
95	2.99	same	same	CORRECT	6	75	-0.333333	0	contour046	Song	0
96	0.798	same	diff	INCORRECT	6	75	-0.333333	0	contour161	Song	0
97	0.879	diff	diff	CORRECT	6	75	-0.333333	2.41	contour075	Speech	2.41
98	1.049	diff	diff	CORRECT	6	75	-0.333333	9.37	contour068	Song	9.37
99	1.339	same	same	CORRECT	6	75	-0.333333	0	contour010	Intermediate	0
100	1.174	same	same	CORRECT	6	75	-0.333333	0	contour123	Song	0
101	0.817	diff	diff	CORRECT	6	75	-0.333333	-8.52	contour106	Intermediate	8.52
102	1.653	same	same	CORRECT	6	75	-0.333333	0	contour078	Intermediate	0
103	1.976	diff	diff	CORRECT	6	75	-0.333333	-8.96	contour117	Speech	8.96
104	1.224	same	same	CORRECT	6	75	-0.333333	0	contour164	Intermediate	0
105	1.202	same	diff	INCORRECT	6	75	-0.333333	2.93	contour065	Song	2.93
106	0.624	diff	diff	CORRECT	6	75	-0.333333	17.5	contour198	Intermediate	17.5
107	0.812	same	same	CORRECT	6	75	-0.333333	0	contour189	Speech	0
108	0.798	diff	diff	CORRECT	6	75	-0.333333	13.24	contour090	Speech	13.24
109	1.053	same	same	CORRECT	6	75	-0.333333	0	contour171	Song	0
110	1.283	same	same	CORRECT	6	75	-0.333333	0	contour113	Song	0
111	0.682	diff	diff	CORRECT	6	75	-0.333333	7.45	contour119	Speech	7.45
112	0.849	same	same	CORRECT	6	75	-0.333333	0	contour039	Speech	0
113	1.145	same	diff	INCORRECT	6	75	-0.333333	2.22	contour104	Speech	2.22
114	1.336	same	same	CORRECT	6	75	-0.333333	0	contour003	Speech	0
115	1.256	diff	diff	CORRECT	6	75	-0.333333	13.21	contour194	Song	13.21
116	2.622	diff	diff	CORRECT	6	75	-0.333333	2.92	contour052	Song	2.92
117	3.18	same	diff	INCORRECT	6	75	-0.333333	-9.14	contour135	Song	9.14
118	0.966	same	same	CORRECT	6	75	-0.333333	0	contour005	Speech	0
119	0.767	same	same	CORRECT	6	75	-0.333333	0	contour091	Intermediate	0
0	1.46	diff	diff	CORRECT	7	64	-0.833333	10.01	contour189	Song	10.01
1	1.463	diff	same	INCORRECT	7	64	-0.833333	0	contour027	Intermediate	0
2	1.534	same	same	CORRECT	7	64	-0.833333	0	contour131	Song	0
3	1.555	diff	diff	CORRECT	7	64	-0.833333	6.28	contour171	Song	6.28
4	6.002	same	same	CORRECT	7	64	-0.833333	0	contour053	Speech	0
5	2.257	diff	diff	CORRECT	7	64	-0.833333	-14.09	contour077	Intermediate	14.09
6	1.616	same	same	CORRECT	7	64	-0.833333	0	contour153	Intermediate	0
7	1.475	same	same	CORRECT	7	64	-0.833333	0	contour096	Intermediate	0
8	2.01	same	same	CORRECT	7	64	-0.833333	0	contour200	Song	0
9	2.302	diff	diff	CORRECT	7	64	-0.833333	8.48	contour194	Speech	8.48
10	2.09	same	diff	INCORRECT	7	64	-0.833333	-8.78	contour117	Song	8.78
11	2.028	same	same	CORRECT	7	64	-0.833333	0	contour008	Intermediate	0
12	1.413	same	same	CORRECT	7	64	-0.833333	0	contour178	Intermediate	0
13	1.816	diff	diff	CORRECT	7	64	-0.833333	-2.92	contour039	Song	2.92
14	1.678	same	diff	INCORRECT	7	64	-0.833333	-8.11	contour128	Intermediate	8.11
15	2.716	same	diff	INCORRECT	7	64	-0.833333	-6.42	contour032	Speech	6.42
16	2.935	same	same	CORRECT	7	64	-0.833333	0	contour168	Intermediate	0
17	2.783	same	diff	INCORRECT	7	64	-0.833333	-2	contour054	Speech	2
18	1.894	same	same	CORRECT	7	64	-0.833333	0	contour118	Song	0
19	1.312	diff	diff	CORRECT	7	64	-0.833333	-7.14	contour022	Speech	7.14
20	3.287	same	same	CORRECT	7	64	-0.833333	0	contour004	Speech	0
21	1.532	same	same	CORRECT	7	64	-0.833333	0	contour035	Speech	0
22	2.911	diff	diff	CORRECT	7	64	-0.833333	5.15	contour085	Speech	5.15
23	1.372	same	same	CORRECT	7	64	-0.833333	0	contour049	Song	0
24	2.634	diff	diff	CORRECT	7	64	-0.833333	0	contour161	Song	0
25	1.359	same	diff	INCORRECT	7	64	-0.833333	-10.13	contour130	Speech	10.13
26	3.062	same	diff	INCORRECT	7	64	-0.833333	-11.54	contour093	Speech	11.54
27	2	same	diff	INCORRECT	7	64	-0.833333	-6.69	contour069	Speech	6.69
28	2.074	same	same	CORRECT	7	64	-0.833333	0	contour059	Song	0
29	3.682	diff	diff	CORRECT	7	64	-0.833333	5.85	contour110	Song	5.85
30	1.947	same	diff	INCORRECT	7	64	-0.833333	9.38	contour150	Song	9.38
31	1.107	same	same	CORRECT	7	64	-0.833333	0	contour064	Intermediate	0
32	3.386	same	same	CORRECT	7	64	-0.833333	0	contour111	Intermediate	0
33	1.411	diff	diff	CORRECT	7	64	-0.833333	14.63	contour088	Song	14.63
34	1.276	same	same	CORRECT	7	64	-0.833333	0	contour071	Song	0
35	1.037	same	same	CORRECT	7	64	-0.833333	0	contour038	Song	0
36	1.311	diff	diff	CORRECT	7	64	-0.833333	17.54	contour048	Song	17.54
37	2.066	same	same	CORRECT	7	64	-0.833333	0	contour103	Intermediate	0
38	1.337	same	same	CORRECT	7	64	-0.833333	0	contour137	Song	0
39	1.112	diff	diff	CORRECT	7	64	-0.833333	-3.36	contour197	Speech	3.36
40	1.07	diff	diff	CORRECT	7	64	-0.833333	13.82	contour150	Intermediate	13.82
41	0.95	same	same	CORRECT	7	64	-0.833333	0	contour038	Intermediate	0
42	1.437	diff	diff	CORRECT	7	64	-0.833333	14.9	contour059	Intermediate	14.9
43	1.411	same	same	CORRECT	7	64	-0.833333	0	contour197	Song	0
44	3.047	same	same	CORRECT	7	64	-0.833333	0	contour103	Song	0
45	1.737	same	diff	INCORRECT	7	64	-0.833333	-3.74	contour168	Speech	3.74
46	1.472	diff	diff	CORRECT	7	64	-0.833333	14.62	contour117	Intermediate	14.62
47	3.495	same	diff	INCORRECT	7	64	-0.833333	13.16	contour054	Intermediate	13.16
48	1.678	same	diff	INCORRECT	7	64	-0.833333	12.08	contour161	Speech	12.08
49	1.8	same	same	CORRECT	7	64	-0.833333	0	contour200	Intermediate	0
50	1.932	same	same	CORRECT	7	64	-0.833333	0	contour027	Speech	0
51	4.327	same	same	CORRECT	7	64	-0.833333	0	contour004	Song	0
52	1.659	same	diff	INCORRECT	7	64	-0.833333	-5.33	contour128	Speech	5.33
53	3.224	same	diff	INCORRECT	7	64	-0.833333	-8.83	contour048	Speech	8.83
54	2.18	same	same	CORRECT	7	64	-0.833333	0	contour032	Intermediate	0
55	1.479	same	same	CORRECT	7	64	-0.833333	0	contour131	Intermediate	0
56	1.377	same	diff	INCORRECT	7	64	-0.833333	-8.55	contour077	Speech	8.55
57	1.56	diff	same	INCORRECT	7	64	-0.833333	0	contour022	Intermediate	0
58	3.406	same	diff	INCORRECT	7	64	-0.833333	2.21	contour130	Intermediate	2.21
59	1.502	same	same	CORRECT	7	64	-0.833333	0	contour178	Song	0
60	1.005	diff	diff	CORRECT	7	64	-0.833333	2.76	contour039	Intermediate	2.76
61	1.207	same	same	CORRECT	7	64	-0.833333	0	contour049	Intermediate	0
62	1.253	same	same	CORRECT	7	64	-0.833333	0	contour171	Speech	0
63	1.951	diff	diff	CORRECT	7	64	-0.833333	11.43	contour137	Speech	11.43
64	3.391	diff	diff	CORRECT	7	64	-0.833333	0.04	contour085	Intermediate	0.04
65	1.593	same	same	CORRECT	7	64	-0.833333	0	contour189	Speech	0
66	3.831	same	same	CORRECT	7	64	-0.833333	0	contour153	Song	0
67	3.197	same	diff	INCORRECT	7	64	-0.833333	-8.57	contour071	Intermediate	8.57
68	1.681	same	same	CORRECT	7	64	-0.833333	0	contour111	Song	0
69	1.397	diff	diff	CORRECT	7	64	-0.833333	2.3	contour069	Song	2.3
70	1.549	diff	diff	CORRECT	7	64	-0.833333	12.34	contour194	Intermediate	12.34
71	1.286	same	same	CORRECT	7	64	-0.833333	0	contour093	Intermediate	0
72	1.786	same	diff	INCORRECT	7	64	-0.833333	-5.29	contour008	Song	5.29
73	1.726	diff	diff	CORRECT	7	64	-0.833333	-11.38	contour118	Intermediate	11.38
74	1.406	diff	diff	CORRECT	7	64	-0.833333	14.79	contour096	Song	14.79
75	1.705	same	same	CORRECT	7	64	-0.833333	0	contour110	Intermediate	0
76	1.002	same	same	CORRECT	7	64	-0.833333	0	contour064	Speech	0
77	2.278	same	same	CORRECT	7	64	-0.833333	0	contour053	Intermediate	0
78	1.544	diff	diff	CORRECT	7	64	-0.833333	-2.92	contour035	Song	2.92
79	1.365	same	same	CORRECT	7	64	-0.833333	0	contour088	Intermediate	0
80	1.267	same	diff	INCORRECT	7	64	-0.833333	-3.4	contour039	Speech	3.4
81	1.492	diff	diff	CORRECT	7	64	-0.833333	13.49	contour178	Speech	13.49
82	5.637	same	diff	INCORRECT	7	64	-0.833333	-3.03	contour197	Intermediate	3.03
83	1.336	same	same	CORRECT	7	64	-0.833333	0	contour137	Intermediate	0
84	1.083	same	same	CORRECT	7	64	-0.833333	0	contour035	Intermediate	0
85	1.376	diff	diff	CORRECT	7	64	-0.833333	0	contour022	Song	0
86	2.429	same	same	CORRECT	7	64	-0.833333	0	contour077	Song	0
87	1.385	same	same	CORRECT	7	64	-0.833333	0	contour200	Speech	0
88	3.242	same	same	CORRECT	7	64	-0.833333	0	contour150	Speech	0
89	2.371	diff	diff	CORRECT	7	64	-0.833333	2.93	contour032	Song	2.93
90	2.213	same	diff	INCORRECT	7	64	-0.833333	-3.28	contour103	Speech	3.28
91	4.162	same	diff	INCORRECT	7	64	-0.833333	5.84	contour085	Song	5.84
92	1.653	same	diff	INCORRECT	7	64	-0.833333	6.59	contour118	Speech	6.59
93	1.676	same	same	CORRECT	7	64	-0.833333	0	contour131	Speech	0
94	1.337	diff	diff	CORRECT	7	64	-0.833333	-3.36	contour168	Song	3.36
95	1.49	same	same	CORRECT	7	64	-0.833333	0	contour071	Speech	0
96	1.05	diff	diff	CORRECT	7	64	-0.833333	18.27	contour069	Intermediate	18.27
97	1.747	diff	diff	CORRECT	7	64	-0.833333	14.36	contour008	Speech	14.36
98	1.325	same	same	CORRECT	7	64	-0.833333	0	contour038	Speech	0
99	2.131	diff	same	INCORRECT	7	64	-0.833333	0	contour128	Song	0
100	1.652	diff	diff	CORRECT	7	64	-0.833333	-8.9	contour088	Speech	8.9
101	1.324	same	diff	INCORRECT	7	64	-0.833333	-8.6	contour171	Intermediate	8.6
102	1.84	same	same	CORRECT	7	64	-0.833333	0	contour110	Speech	0
103	1.191	same	same	CORRECT	7	64	-0.833333	0	contour059	Speech	0
104	1.742	same	diff	INCORRECT	7	64	-0.833333	0	contour064	Song	0
105	3.007	diff	same	INCORRECT	7	64	-0.833333	0	contour189	Intermediate	0
106	1.326	same	same	CORRECT	7	64	-0.833333	0	contour096	Speech	0
107	1.559	diff	diff	CORRECT	7	64	-0.833333	13.21	contour194	Song	13.21
108	1.224	same	same	CORRECT	7	64	-0.833333	0	contour117	Speech	0
109	1.42	same	same	CORRECT	7	64	-0.833333	0	contour093	Song	0
110	3.303	same	same	CORRECT	7	64	-0.833333	0	contour053	Song	0
111	2.905	same	same	CORRECT	7	64	-0.833333	0	contour004	Intermediate	0
112	1.576	diff	diff	CORRECT	7	64	-0.833333	-8.24	contour049	Speech	8.24
113	1.896	same	same	CORRECT	7	64	-0.833333	0	contour027	Song	0
114	2.18	diff	same	INCORRECT	7	64	-0.833333	0	contour153	Speech	0
115	3.025	diff	diff	CORRECT	7	64	-0.833333	-12.34	contour054	Song	12.34
116	1.145	same	same	CORRECT	7	64	-0.833333	0	contour111	Speech	0
117	1.24	same	diff	INCORRECT	7	64	-0.833333	2.92	contour130	Song	2.92
118	1.794	same	diff	INCORRECT	7	64	-0.833333	12.87	contour161	Intermediate	12.87
119	1.264	diff	diff	CORRECT	7	64	-0.833333	8.58	contour048	Intermediate	8.58
0	3.64	same	diff	INCORRECT	8	81	-0.5	-6.88	contour016	Speech	6.88
1	1.899	same	same	CORRECT	8	81	-0.5	0	contour109	Speech	0
2	1.514	same	same	CORRECT	8	81	-0.5	0	contour130	Intermediate	0
3	2.322	same	same	CORRECT	8	81	-0.5	0	contour133	Speech	0
4	1.691	same	same	CORRECT	8	81	-0.5	0	contour018	Intermediate	0
5	1.611	diff	diff	CORRECT	8	81	-0.5	-6.42	contour032	Speech	6.42
6	4.945	same	same	CORRECT	8	81	-0.5	0	contour110	Song	0
7	3.794	same	diff	INCORRECT	8	81	-0.5	9.38	contour150	Song	9.38
8	1.478	same	diff	INCORRECT	8	81	-0.5	-3.37	contour114	Speech	3.37
9	1.249	same	same	CORRECT	8	81	-0.5	0	contour038	Song	0
10	1.388	diff	diff	CORRECT	8	81	-0.5	-7.93	contour160	Speech	7.93
11	1.223	diff	diff	CORRECT	8	81	-0.5	16.56	contour034	Intermediate	16.56
12	2.165	same	diff	INCORRECT	8	81	-0.5	-3.08	contour200	Intermediate	3.08
13	1.562	diff	diff	CORRECT	8	81	-0.5	-5.99	contour164	Intermediate	5.99
14	2.445	diff	diff	CORRECT	8	81	-0.5	-7.87	contour078	Song	7.87
15	1.389	diff	diff	CORRECT	8	81	-0.5	14.63	contour182	Song	14.63
16	2.149	same	same	CORRECT	8	81	-0.5	0	contour135	Speech	0
17	1.053	diff	diff	CORRECT	8	81	-0.5	-6.94	contour069	Speech	6.94
18	1.916	same	same	CORRECT	8	81	-0.5	0	contour147	Intermediate	0
19	4.611	diff	diff	CORRECT	8	81	-0.5	6.29	contour025	Song	6.29
20	1.488	same	same	CORRECT	8	81	-0.5	0	contour065	Song	0
21	1.679	same	same	CORRECT	8	81	-0.5	0	contour057	Speech	0
22	1.846	diff	diff	CORRECT	8	81	-0.5	-2.98	contour035	Intermediate	2.98
23	1.704	diff	diff	CORRECT	8	81	-0.5	14.9	contour059	Intermediate	14.9
24	2.047	same	same	CORRECT	8	81	-0.5	0	contour123	Intermediate	0
25	1.28	same	same	CORRECT	8	81	-0.5	0	contour082	Speech	0
26	2.214	diff	diff	CORRECT	8	81	-0.5	-8.85	contour047	Intermediate	8.85
27	3.848	same	same	CORRECT	8	81	-0.5	0	contour128	Intermediate	0
28	1.281	same	same	CORRECT	8	81	-0.5	0	contour167	Intermediate	0
29	1.988	diff	diff	CORRECT	8	81	-0.5	2.41	contour075	Speech	2.41
30	1.424	diff	diff	CORRECT	8	81	-0.5	-4.63	contour071	Speech	4.63
31	1.286	same	same	CORRECT	8	81	-0.5	0	contour165	Speech	0
32	1.799	same	diff	INCORRECT	8	81	-0.5	-1.95	contour053	Speech	1.95
33	1.329	same	same	CORRECT	8	81	-0.5	0	contour099	Speech	0
34	1.819	same	same	CORRECT	8	81	-0.5	0	contour131	Song	0
35	1.378	same	same	CORRECT	8	81	-0.5	0	contour174	Intermediate	0
36	1.365	same	same	CORRECT	8	81	-0.5	0	contour198	Intermediate	0
37	2.643	same	diff	INCORRECT	8	81	-0.5	-3.63	contour189	Speech	3.63
38	1.452	diff	diff	CORRECT	8	81	-0.5	14.63	contour088	Song	14.63
39	1.415	same	same	CORRECT	8	81	-0.5	0	contour104	Intermediate	0
40	1.334	same	same	CORRECT	8	81	-0.5	0	contour082	Song	0
41	1.266	same	diff	INCORRECT	8	81	-0.5	-6.67	contour174	Speech	6.67
42	3.216	diff	diff	CORRECT	8	81	-0.5	-2.98	contour099	Intermediate	2.98
43	2.236	same	same	CORRECT	8	81	-0.5	0	contour130	Song	0
44	1.336	same	same	CORRECT	8	81	-0.5	0	contour071	Song	0
45	1.601	diff	diff	CORRECT	8	81	-0.5	-14.52	contour110	Intermediate	14.52
46	1.599	same	same	CORRECT	8	81	-0.5	0	contour075	Song	0
47	1.522	same	same	CORRECT	8	81	-0.5	0	contour198	Speech	0
48	1.726	diff	diff	CORRECT	8	81	-0.5	18.27	contour069	Intermediate	18.27
49	1.629	diff	diff	CORRECT	8	81	-0.5	2.23	contour189	Intermediate	2.23
50	3.197	same	diff	INCORRECT	8	81	-0.5	-8.26	contour150	Speech	8.26
51	1.52	diff	diff	CORRECT	8	81	-0.5	-10.32	contour131	Intermediate	10.32
52	1.421	diff	diff	CORRECT	8	81	-0.5	2.22	contour104	Speech	2.22
53	1.363	same	same	CORRECT	8	81	-0.5	0	contour018	Speech	0
54	1.735	same	same	CORRECT	8	81	-0.5	0	contour164	Song	0
55	2.019	same	diff	INCORRECT	8	81	-0.5	2.93	contour032	Song	2.93
56	1.727	same	diff	INCORRECT	8	81	-0.5	-9.14	contour135	Song	9.14
57	1.419	same	same	CORRECT	8	81	-0.5	0	contour160	Song	0
58	1.157	same	same	CORRECT	8	81	-0.5	0	contour165	Song	0
59	1.898	same	same	CORRECT	8	81	-0.5	0	contour128	Speech	0
60	2.196	same	same	CORRECT	8	81	-0.5	0	contour167	Speech	0
61	1.252	same	same	CORRECT	8	81	-0.5	0	contour200	Song	0
62	1.662	same	same	CORRECT	8	81	-0.5	0	contour123	Speech	0
63	2.023	diff	same	INCORRECT	8	81	-0.5	0	contour078	Speech	0
64	1.355	same	diff	INCORRECT	8	81	-0.5	-3.96	contour025	Speech	3.96
65	1.337	diff	diff	CORRECT	8	81	-0.5	-10.4	contour147	Song	10.4
66	1.179	diff	diff	CORRECT	8	81	-0.5	-12.95	contour133	Intermediate	12.95
67	1.699	same	same	CORRECT	8	81	-0.5	0	contour035	Speech	0
68	1.329	same	same	CORRECT	8	81	-0.5	0	contour059	Song	0
69	1.718	same	same	CORRECT	8	81	-0.5	0	contour034	Song	0
70	1.622	same	diff	INCORRECT	8	81	-0.5	2.5	contour065	Speech	2.5
71	4.08	diff	diff	CORRECT	8	81	-0.5	-5.61	contour057	Intermediate	5.61
72	1.231	same	same	CORRECT	8	81	-0.5	0	contour109	Intermediate	0
73	3.253	same	diff	INCORRECT	8	81	-0.5	-6.15	contour016	Intermediate	6.15
74	1.522	diff	diff	CORRECT	8	81	-0.5	19.02	contour047	Song	19.02
75	2.107	diff	same	INCORRECT	8	81	-0.5	0	contour088	Intermediate	0
76	1.288	diff	diff	CORRECT	8	81	-0.5	-9.62	contour053	Intermediate	9.62
77	3.017	same	diff	INCORRECT	8	81	-0.5	-3.26	contour038	Intermediate	3.26
78	1.447	same	same	CORRECT	8	81	-0.5	0	contour114	Song	0
79	1.625	diff	diff	CORRECT	8	81	-0.5	0	contour182	Intermediate	0
80	6.701	diff	diff	CORRECT	8	81	-0.5	2.75	contour114	Intermediate	2.75
81	1.246	same	same	CORRECT	8	81	-0.5	0	contour075	Intermediate	0
82	1.698	same	same	CORRECT	8	81	-0.5	0	contour130	Speech	0
83	1.769	same	diff	INCORRECT	8	81	-0.5	-6.89	contour147	Speech	6.89
84	4.607	diff	same	INCORRECT	8	81	-0.5	0	contour099	Song	0
85	1.451	same	same	CORRECT	8	81	-0.5	0	contour198	Song	0
86	1.371	same	same	CORRECT	8	81	-0.5	0	contour047	Speech	0
87	1.366	diff	diff	CORRECT	8	81	-0.5	2.93	contour123	Song	2.93
88	1.42	same	same	CORRECT	8	81	-0.5	0	contour165	Intermediate	0
89	1.384	diff	diff	CORRECT	8	81	-0.5	-9.16	contour034	Speech	9.16
90	3.994	diff	diff	CORRECT	8	81	-0.5	-9.88	contour135	Intermediate	9.88
91	1.552	diff	diff	CORRECT	8	81	-0.5	-8.21	contour078	Intermediate	8.21
92	1.297	diff	diff	CORRECT	8	81	-0.5	9.38	contour133	Song	9.38
93	1.409	same	same	CORRECT	8	81	-0.5	0	contour065	Intermediate	0
94	1.387	same	same	CORRECT	8	81	-0.5	0	contour131	Speech	0
95	1.522	same	same	CORRECT	8	81	-0.5	0	contour059	Speech	0
96	1.113	diff	diff	CORRECT	8	81	-0.5	-8.78	contour167	Song	8.78
97	1.451	same	same	CORRECT	8	81	-0.5	0	contour110	Speech	0
98	0.949	diff	diff	CORRECT	8	81	-0.5	13.82	contour150	Intermediate	13.82
99	1.067	diff	diff	CORRECT	8	81	-0.5	2.3	contour069	Song	2.3
100	2.256	same	same	CORRECT	8	81	-0.5	0	contour128	Song	0
101	1.212	diff	diff	CORRECT	8	81	-0.5	-8.57	contour071	Intermediate	8.57
102	1.806	same	same	CORRECT	8	81	-0.5	0	contour109	Song	0
103	1.014	diff	diff	CORRECT	8	81	-0.5	9.37	contour018	Song	9.37
104	0.943	diff	diff	CORRECT	8	81	-0.5	19.03	contour053	Song	19.03
105	1.432	diff	diff	CORRECT	8	81	-0.5	10.01	contour189	Song	10.01
106	1.727	diff	same	INCORRECT	8	81	-0.5	0	contour082	Intermediate	0
107	2.4	same	same	CORRECT	8	81	-0.5	0	contour016	Song	0
108	1.314	same	same	CORRECT	8	81	-0.5	0	contour174	Song	0
109	1.216	same	diff	INCORRECT	8	81	-0.5	2.19	contour038	Speech	2.19
110	1.516	same	same	CORRECT	8	81	-0.5	0	contour200	Speech	0
111	1.322	diff	diff	CORRECT	8	81	-0.5	-2.92	contour035	Song	2.92
112	1.65	same	same	CORRECT	8	81	-0.5	0	contour160	Intermediate	0
113	1.455	same	same	CORRECT	8	81	-0.5	0	contour025	Intermediate	0
114	1.841	diff	diff	CORRECT	8	81	-0.5	-8.91	contour088	Speech	8.91
115	2.459	same	same	CORRECT	8	81	-0.5	0	contour032	Intermediate	0
116	1.535	diff	diff	CORRECT	8	81	-0.5	14.24	contour182	Speech	14.24
117	1.365	diff	diff	CORRECT	8	81	-0.5	-6.45	contour164	Speech	6.45
118	1.541	same	same	CORRECT	8	81	-0.5	0	contour104	Song	0
119	2.689	same	diff	INCORRECT	8	81	-0.5	-5.3	contour057	Song	5.3
0	1.021	same	same	CORRECT	9	54	0	0	contour128	Song	0
1	1.872	same	same	CORRECT	9	54	0	0	contour059	Song	0
2	1.407	diff	diff	CORRECT	9	54	0	-7.88	contour046	Song	7.88
3	1.387	same	diff	INCORRECT	9	54	0	-2.93	contour137	Song	2.93
4	1.354	same	diff	INCORRECT	9	54	0	-8.6	contour171	Intermediate	8.6
5	1.231	same	same	CORRECT	9	54	0	0	contour178	Intermediate	0
6	1.306	diff	diff	CORRECT	9	54	0	12.18	contour161	Speech	12.18
7	1.348	diff	diff	CORRECT	9	54	0	10.01	contour189	Song	10.01
8	1.582	same	same	CORRECT	9	54	0	0	contour083	Song	0
9	2.85	same	diff	INCORRECT	9	54	0	-2.92	contour075	Song	2.92
10	1.626	same	same	CORRECT	9	54	0	0	contour155	Song	0
11	1.513	diff	diff	CORRECT	9	54	0	14.23	contour068	Speech	14.23
12	1.091	diff	diff	CORRECT	9	54	0	9.15	contour018	Speech	9.15
13	4.444	same	diff	INCORRECT	9	54	0	9.37	contour034	Song	9.37
14	2.374	same	same	CORRECT	9	54	0	0	contour168	Song	0
15	1.712	diff	diff	CORRECT	9	54	0	9.38	contour133	Song	9.38
16	3.793	diff	diff	CORRECT	9	54	0	19.02	contour047	Song	19.02
17	1.185	same	same	CORRECT	9	54	0	0	contour069	Speech	0
18	1.775	diff	same	INCORRECT	9	54	0	0	contour090	Intermediate	0
19	1.66	same	same	CORRECT	9	54	0	0	contour078	Song	0
20	0.995	diff	diff	CORRECT	9	54	0	-8.47	contour157	Speech	8.47
21	1.791	same	diff	INCORRECT	9	54	0	-8.83	contour048	Speech	8.83
22	2.327	same	same	CORRECT	9	54	0	0	contour194	Intermediate	0
23	1.397	same	same	CORRECT	9	54	0	0	contour052	Intermediate	0
24	2.13	same	diff	INCORRECT	9	54	0	-9.35	contour167	Intermediate	9.35
25	1.459	same	same	CORRECT	9	54	0	0	contour038	Song	0
26	1.111	diff	diff	CORRECT	9	54	0	8.51	contour036	Song	8.51
27	4.963	diff	diff	CORRECT	9	54	0	7.03	contour152	Speech	7.03
28	2.072	same	same	CORRECT	9	54	0	0	contour174	Speech	0
29	1.115	same	same	CORRECT	9	54	0	0	contour131	Speech	0
30	2.352	diff	diff	CORRECT	9	54	0	2.75	contour114	Intermediate	2.75
31	1.096	same	same	CORRECT	9	54	0	0	contour095	Song	0
32	1.189	same	same	CORRECT	9	54	0	0	contour099	Song	0
33	1.306	same	same	CORRECT	9	54	0	0	contour004	Intermediate	0
34	1.458	same	same	CORRECT	9	54	0	0	contour126	Intermediate	0
35	0.963	diff	diff	CORRECT	9	54	0	-11.38	contour118	Intermediate	11.38
36	1.433	same	same	CORRECT	9	54	0	0	contour085	Speech	0
37	1.48	same	same	CORRECT	9	54	0	0	contour025	Intermediate	0
38	0.896	diff	diff	CORRECT	9	54	0	6.43	contour003	Speech	6.43
39	1.203	diff	diff	CORRECT	9	54	0	-2.92	contour035	Song	2.92
40	1.154	diff	diff	CORRECT	9	54	0	9.37	contour018	Song	9.37
41	1.216	same	diff	INCORRECT	9	54	0	5.84	contour085	Song	5.84
42	1.231	same	same	CORRECT	9	54	0	0	contour099	Speech	0
43	1.008	same	same	CORRECT	9	54	0	0	contour178	Song	0
44	1.2	same	same	CORRECT	9	54	0	0	contour114	Speech	0
45	0.926	diff	diff	CORRECT	9	54	0	-3.96	contour025	Speech	3.96
46	1.276	same	same	CORRECT	9	54	0	0	contour189	Speech	0
47	1.414	same	same	CORRECT	9	54	0	0	contour075	Intermediate	0
48	2.813	same	diff	INCORRECT	9	54	0	5.31	contour083	Speech	5.31
49	1.342	same	same	CORRECT	9	54	0	0	contour131	Intermediate	0
50	1.195	same	same	CORRECT	9	54	0	0	contour069	Intermediate	0
51	1.611	same	same	CORRECT	9	54	0	0	contour157	Song	0
52	4.846	diff	diff	CORRECT	9	54	0	8.84	contour036	Speech	8.84
53	2.476	same	diff	INCORRECT	9	54	0	0	contour155	Intermediate	0
54	0.977	diff	diff	CORRECT	9	54	0	14.79	contour090	Song	14.79
55	1.229	same	same	CORRECT	9	54	0	0	contour038	Intermediate	0
56	1.36	same	same	CORRECT	9	54	0	0	contour194	Speech	0
57	0.935	diff	diff	CORRECT	9	54	0	11.43	contour137	Speech	11.43
58	0.792	same	same	CORRECT	9	54	0	0	contour046	Speech	0
59	1.426	same	same	CORRECT	9	54	0	0	contour118	Song	0
60	1.288	same	same	CORRECT	9	54	0	0	contour126	Song	0
61	1.992	same	diff	INCORRECT	9	54	0	2.92	contour052	Song	2.92
62	1.146	same	same	CORRECT	9	54	0	0	contour128	Intermediate	0
63	1.974	same	same	CORRECT	9	54	0	0	contour068	Intermediate	0
64	0.621	diff	diff	CORRECT	9	54	0	6.28	contour171	Song	6.28
65	1.219	diff	diff	CORRECT	9	54	0	-5.3	contour174	Song	5.3
66	1.914	same	diff	INCORRECT	9	54	0	-3.74	contour168	Speech	3.74
67	1.117	same	diff	INCORRECT	9	54	0	0	contour161	Song	0
68	1.407	diff	diff	CORRECT	9	54	0	16.56	contour034	Intermediate	16.56
69	1.828	same	same	CORRECT	9	54	0	0	contour078	Intermediate	0
70	1.142	diff	diff	CORRECT	9	54	0	-12.96	contour133	Intermediate	12.96
71	1.009	diff	diff	CORRECT	9	54	0	8.64	contour059	Speech	8.64
72	1.883	same	diff	INCORRECT	9	54	0	-8.85	contour047	Intermediate	8.85
73	1.212	same	same	CORRECT	9	54	0	0	contour004	Song	0
74	1.541	same	same	CORRECT	9	54	0	0	contour035	Intermediate	0
75	1.245	same	diff	INCORRECT	9	54	0	-10.41	contour152	Song	10.41
76	1.927	diff	diff	CORRECT	9	54	0	17.54	contour048	Song	17.54
77	1.024	same	diff	INCORRECT	9	54	0	-2.37	contour003	Song	2.37
78	1.945	same	same	CORRECT	9	54	0	0	contour095	Intermediate	0
79	3.961	same	same	CORRECT	9	54	0	0	contour167	Speech	0
80	4.298	same	diff	INCORRECT	9	54	0	12.87	contour161	Intermediate	12.87
81	1.602	same	same	CORRECT	9	54	0	0	contour114	Song	0
82	1.642	same	same	CORRECT	9	54	0	0	contour048	Intermediate	0
83	1.375	diff	diff	CORRECT	9	54	0	13.24	contour090	Speech	13.24
84	1.394	same	diff	INCORRECT	9	54	0	0	contour078	Speech	0
85	1.392	same	same	CORRECT	9	54	0	0	contour137	Intermediate	0
86	1.44	same	same	CORRECT	9	54	0	0	contour046	Intermediate	0
87	1.126	same	same	CORRECT	9	54	0	0	contour174	Intermediate	0
88	1.317	diff	diff	CORRECT	9	54	0	-2.98	contour099	Intermediate	2.98
89	0.799	diff	diff	CORRECT	9	54	0	-6.21	contour083	Intermediate	6.21
90	1.769	diff	diff	CORRECT	9	54	0	6.53	contour118	Speech	6.53
91	1.081	same	same	CORRECT	9	54	0	0	contour069	Song	0
92	1.366	same	same	CORRECT	9	54	0	0	contour152	Intermediate	0
93	14.981	same	same	CORRECT	9	54	0	0	contour003	Intermediate	0
94	1.03	diff	diff	CORRECT	9	54	0	0.04	contour085	Intermediate	0.04
95	12.387	same	same	CORRECT	9	54	0	0	contour068	Song	0
96	1.761	same	same	CORRECT	9	54	0	0	contour167	Song	0
97	1.071	same	diff	INCORRECT	9	54	0	-5.12	contour126	Speech	5.12
98	0.953	same	same	CORRECT	9	54	0	0	contour095	Speech	0
99	1.145	same	same	CORRECT	9	54	0	0	contour171	Speech	0
100	1.926	same	diff	INCORRECT	9	54	0	-3.41	contour133	Speech	3.41
101	1.297	diff	diff	CORRECT	9	54	0	18.46	contour047	Speech	18.46
102	1.77	same	diff	INCORRECT	9	54	0	-5.33	contour128	Speech	5.33
103	0.879	diff	diff	CORRECT	9	54	0	14.9	contour059	Intermediate	14.9
104	2.97	diff	diff	CORRECT	9	54	0	2.23	contour189	Intermediate	2.23
105	0.896	diff	diff	CORRECT	9	54	0	13.21	contour194	Song	13.21
106	1.256	same	same	CORRECT	9	54	0	0	contour075	Speech	0
107	1.016	same	diff	INCORRECT	9	54	0	-8.61	contour035	Speech	8.61
108	1.273	diff	diff	CORRECT	9	54	0	6.29	contour025	Song	6.29
109	1.186	same	same	CORRECT	9	54	0	0	contour168	Intermediate	0
110	2.544	same	diff	INCORRECT	9	54	0	2.61	contour157	Intermediate	2.61
111	1.309	diff	diff	CORRECT	9	54	0	5.73	contour004	Speech	5.73
112	1.205	same	diff	INCORRECT	9	54	0	2.19	contour038	Speech	2.19
113	3.64	diff	same	INCORRECT	9	54	0	0	contour052	Speech	0
114	2.081	same	same	CORRECT	9	54	0	0	contour034	Speech	0
115	0.888	same	same	CORRECT	9	54	0	0	contour036	Intermediate	0
116	1.237	same	diff	INCORRECT	9	54	0	-11.23	contour131	Song	11.23
117	1.035	same	same	CORRECT	9	54	0	0	contour178	Speech	0
118	2.485	diff	same	INCORRECT	9	54	0	0	contour018	Intermediate	0
119	1.762	same	same	CORRECT	9	54	0	0	contour155	Speech	0
0	4.667	same	same	CORRECT	10	64	-1	0	contour032	Intermediate	0
1	0.71	same	same	CORRECT	10	64	-1	0	contour057	Speech	0
2	0.54	diff	diff	CORRECT	10	64	-1	-9.04	contour165	Intermediate	9.04
3	0.544	diff	diff	CORRECT	10	64	-1	-5.7	contour186	Speech	5.7
4	2.16	same	diff	INCORRECT	10	64	-1	-5.33	contour128	Speech	5.33
5	1.624	diff	diff	CORRECT	10	64	-1	5.73	contour004	Speech	5.73
6	0.688	diff	diff	CORRECT	10	64	-1	14.63	contour088	Song	14.63
7	1.024	diff	diff	CORRECT	10	64	-1	-3.36	contour197	Speech	3.36
8	1.034	same	same	CORRECT	10	64	-1	0	contour046	Intermediate	0
9	1.307	same	same	CORRECT	10	64	-1	0	contour174	Intermediate	0
10	0.92	diff	same	INCORRECT	10	64	-1	0	contour052	Speech	0
11	0.644	diff	diff	CORRECT	10	64	-1	-7.89	contour095	Intermediate	7.89
12	1.315	same	same	CORRECT	10	64	-1	0	contour034	Intermediate	0
13	1.267	diff	diff	CORRECT	10	64	-1	16.31	contour060	Intermediate	16.31
14	0.916	diff	diff	CORRECT	10	64	-1	11.15	contour042	Intermediate	11.15
15	1.589	same	same	CORRECT	10	64	-1	0	contour147	Speech	0
16	0.819	same	same	CORRECT	10	64	-1	0	contour157	Speech	0
17	1.244	diff	diff	CORRECT	10	64	-1	5.75	contour162	Speech	5.75
18	1.546	same	diff	INCORRECT	10	64	-1	-6.15	contour016	Intermediate	6.15
19	0.852	same	same	CORRECT	10	64	-1	0	contour035	Song	0
20	1.167	same	same	CORRECT	10	64	-1	0	contour117	Song	0
21	1.531	same	same	CORRECT	10	64	-1	0	contour131	Song	0
22	1.481	same	same	CORRECT	10	64	-1	0	contour153	Intermediate	0
23	0.831	same	same	CORRECT	10	64	-1	0	contour039	Song	0
24	1.215	diff	diff	CORRECT	10	64	-1	-6.68	contour167	Speech	6.68
25	1.501	same	diff	INCORRECT	10	64	-1	-3.26	contour038	Intermediate	3.26
26	1.064	diff	same	INCORRECT	10	64	-1	0	contour155	Intermediate	0
27	0.582	diff	diff	CORRECT	10	64	-1	-5.29	contour008	Song	5.29
28	1.09	same	same	CORRECT	10	64	-1	0	contour071	Song	0
29	0.868	diff	diff	CORRECT	10	64	-1	8.51	contour036	Song	8.51
30	0.898	same	diff	INCORRECT	10	64	-1	-8.38	contour135	Speech	8.38
31	0.958	same	same	CORRECT	10	64	-1	0	contour003	Speech	0
32	0.767	diff	diff	CORRECT	10	64	-1	12.44	contour011	Song	12.44
33	0.816	diff	diff	CORRECT	10	64	-1	7.54	contour103	Intermediate	7.54
34	2.172	diff	diff	CORRECT	10	64	-1	-3.96	contour025	Speech	3.96
35	0.896	diff	diff	CORRECT	10	64	-1	11.43	contour137	Speech	11.43
36	1.42	same	same	CORRECT	10	64	-1	0	contour086	Intermediate	0
37	1.177	same	same	CORRECT	10	64	-1	0	contour152	Speech	0
38	1.128	same	same	CORRECT	10	64	-1	0	contour106	Speech	0
39	1.016	same	same	CORRECT	10	64	-1	0	contour047	Intermediate	0
40	0.999	same	same	CORRECT	10	64	-1	0	contour004	Intermediate	0
41	0.758	diff	diff	CORRECT	10	64	-1	2.93	contour165	Song	2.93
42	0.711	same	same	CORRECT	10	64	-1	0	contour088	Intermediate	0
43	1.057	diff	diff	CORRECT	10	64	-1	2.93	contour032	Song	2.93
44	0.737	same	same	CORRECT	10	64	-1	0	contour162	Song	0
45	1.054	diff	diff	CORRECT	10	64	-1	19.02	contour047	Song	19.02
46	0.926	same	same	CORRECT	10	64	-1	0	contour036	Intermediate	0
47	0.976	same	diff	INCORRECT	10	64	-1	-3.29	contour103	Speech	3.29
48	1.004	same	same	CORRECT	10	64	-1	0	contour174	Song	0
49	1.023	same	same	CORRECT	10	64	-1	0	contour135	Intermediate	0
50	0.817	diff	diff	CORRECT	10	64	-1	8.47	contour011	Intermediate	8.47
51	1.219	diff	diff	CORRECT	10	64	-1	-6.86	contour060	Speech	6.86
52	1.157	diff	diff	CORRECT	10	64	-1	-2.92	contour042	Song	2.92
53	0.967	same	same	CORRECT	10	64	-1	0	contour071	Speech	0
54	0.638	diff	diff	CORRECT	10	64	-1	-5.61	contour057	Intermediate	5.61
55	0.73	same	diff	INCORRECT	10	64	-1	0	contour128	Song	0
56	0.9	same	same	CORRECT	10	64	-1	0	contour052	Song	0
57	0.673	same	diff	INCORRECT	10	64	-1	2.19	contour038	Speech	2.19
58	0.666	diff	diff	CORRECT	10	64	-1	2.93	contour095	Song	2.93
59	0.774	same	same	CORRECT	10	64	-1	0	contour025	Song	0
60	1.019	same	same	CORRECT	10	64	-1	0	contour117	Speech	0
61	1.083	same	same	CORRECT	10	64	-1	0	contour152	Intermediate	0
62	1.203	same	same	CORRECT	10	64	-1	0	contour008	Speech	0
63	0.689	diff	diff	CORRECT	10	64	-1	-8.52	contour106	Intermediate	8.52
64	1.153	diff	diff	CORRECT	10	64	-1	-10.74	contour046	Speech	10.74
65	0.928	same	diff	INCORRECT	10	64	-1	-1.73	contour155	Speech	1.73
66	0.643	same	same	CORRECT	10	64	-1	0	contour016	Song	0
67	1.166	same	diff	INCORRECT	10	64	-1	0	contour186	Song	0
68	0.842	same	same	CORRECT	10	64	-1	0	contour167	Song	0
69	0.558	diff	diff	CORRECT	10	64	-1	-9.27	contour034	Speech	9.27
70	0.932	same	same	CORRECT	10	64	-1	0	contour137	Song	0
71	1.145	diff	diff	CORRECT	10	64	-1	-2.98	contour035	Intermediate	2.98
72	0.78	same	same	CORRECT	10	64	-1	0	contour003	Song	0
73	1.025	same	same	CORRECT	10	64	-1	0	contour157	Song	0
74	1.184	diff	diff	CORRECT	10	64	-1	9.93	contour086	Speech	9.93
75	1.005	diff	diff	CORRECT	10	64	-1	12	contour147	Intermediate	12
76	0.822	same	same	CORRECT	10	64	-1	0	contour153	Speech	0
77	1.132	same	same	CORRECT	10	64	-1	0	contour197	Intermediate	0
78	0.964	diff	diff	CORRECT	10	64	-1	-10.32	contour131	Intermediate	10.32
79	1.233	same	same	CORRECT	10	64	-1	0	contour039	Intermediate	0
80	0.908	same	diff	INCORRECT	10	64	-1	0	contour025	Intermediate	0
81	0.661	same	same	CORRECT	10	64	-1	0	contour047	Speech	0
82	1.665	same	same	CORRECT	10	64	-1	0	contour004	Song	0
83	0.942	same	same	CORRECT	10	64	-1	0	contour106	Song	0
84	0.78	same	diff	INCORRECT	10	64	-1	0	contour186	Intermediate	0
85	1.225	same	same	CORRECT	10	64	-1	0	contour052	Intermediate	0
86	1.087	same	same	CORRECT	10	64	-1	0	contour038	Song	0
87	0.7	diff	diff	CORRECT	10	64	-1	-10.41	contour152	Song	10.41
88	0.716	diff	same	INCORRECT	10	64	-1	0	contour060	Song	0
89	0.992	diff	diff	CORRECT	10	64	-1	2.6	contour157	Intermediate	2.6
90	2.9	diff	diff	CORRECT	10	64	-1	19.02	contour103	Song	19.02
91	0.961	diff	diff	CORRECT	10	64	-1	2.77	contour003	Intermediate	2.77
92	0.751	diff	diff	CORRECT	10	64	-1	-8.92	contour088	Speech	8.92
93	1.26	same	same	CORRECT	10	64	-1	0	contour135	Song	0
94	1.05	same	same	CORRECT	10	64	-1	0	contour167	Intermediate	0
95	1.202	same	same	CORRECT	10	64	-1	0	contour046	Song	0
96	1.23	diff	diff	CORRECT	10	64	-1	-8.11	contour128	Intermediate	8.11
97	0.901	same	same	CORRECT	10	64	-1	0	contour016	Speech	0
98	0.581	same	same	CORRECT	10	64	-1	0	contour032	Speech	0
99	1.727	same	diff	INCORRECT	10	64	-1	-1.59	contour011	Speech	1.59
100	0.875	same	same	CORRECT	10	64	-1	0	contour042	Speech	0
101	0.798	diff	diff	CORRECT	10	64	-1	-2.92	contour197	Song	2.92
102	0.665	diff	diff	CORRECT	10	64	-1	16.86	contour008	Intermediate	16.86
103	0.729	same	same	CORRECT	10	64	-1	0	contour095	Speech	0
104	1.18	same	same	CORRECT	10	64	-1	0	contour162	Intermediate	0
105	1.014	diff	diff	CORRECT	10	64	-1	-2.92	contour086	Song	2.92
106	1.602	same	diff	INCORRECT	10	64	-1	-8.61	contour035	Speech	8.61
107	0.951	diff	diff	CORRECT	10	64	-1	-5.3	contour057	Song	5.3
108	1.102	diff	diff	CORRECT	10	64	-1	14.62	contour117	Intermediate	14.62
109	1.07	same	same	CORRECT	10	64	-1	0	contour155	Song	0
110	0.732	same	same	CORRECT	10	64	-1	0	contour147	Song	0
111	0.762	diff	same	INCORRECT	10	64	-1	0	contour034	Song	0
112	0.828	diff	diff	CORRECT	10	64	-1	-14.44	contour153	Song	14.44
113	1.287	same	diff	INCORRECT	10	64	-1	2.42	contour165	Speech	2.42
114	2.721	same	diff	INCORRECT	10	64	-1	-8.57	contour071	Intermediate	8.57
115	0.512	same	same	CORRECT	10	64	-1	0	contour137	Intermediate	0
116	0.893	diff	diff	CORRECT	10	64	-1	8.84	contour036	Speech	8.84
117	1.026	same	same	CORRECT	10	64	-1	0	contour174	Speech	0
118	2.012	diff	same	INCORRECT	10	64	-1	0	contour131	Speech	0
119	1.41	diff	diff	CORRECT	10	64	-1	-3.4	contour039	Speech	3.4
0	1.821	same	diff	INCORRECT	11	60	-0.666667	0	contour128	Song	0
1	2.556	same	diff	INCORRECT	11	60	-0.666667	2.93	contour165	Song	2.93
2	2.681	same	diff	INCORRECT	11	60	-0.666667	-7.66	contour153	Speech	7.66
3	2.779	same	same	CORRECT	11	60	-0.666667	0	contour088	Intermediate	0
4	3.851	same	same	CORRECT	11	60	-0.666667	0	contour164	Speech	0
5	3.056	same	same	CORRECT	11	60	-0.666667	0	contour198	Speech	0
6	1.307	diff	diff	CORRECT	11	60	-0.666667	-8.96	contour117	Speech	8.96
7	1.747	same	same	CORRECT	11	60	-0.666667	0	contour160	Speech	0
8	2.324	same	same	CORRECT	11	60	-0.666667	0	contour197	Intermediate	0
9	1.23	diff	diff	CORRECT	11	60	-0.666667	-9.62	contour060	Song	9.62
10	2.612	diff	same	INCORRECT	11	60	-0.666667	0	contour011	Song	0
11	1.641	same	same	CORRECT	11	60	-0.666667	0	contour095	Intermediate	0
12	3.035	same	diff	INCORRECT	11	60	-0.666667	2.93	contour065	Song	2.93
13	2.414	diff	diff	CORRECT	11	60	-0.666667	-10.4	contour147	Song	10.4
14	1.875	diff	diff	CORRECT	11	60	-0.666667	8.51	contour036	Song	8.51
15	2.282	same	same	CORRECT	11	60	-0.666667	0	contour016	Intermediate	0
16	1.548	same	same	CORRECT	11	60	-0.666667	0	contour034	Intermediate	0
17	4.594	same	same	CORRECT	11	60	-0.666667	0	contour093	Speech	0
18	0.974	diff	diff	CORRECT	11	60	-0.666667	5.74	contour037	Speech	5.74
19	1.399	diff	diff	CORRECT	11	60	-0.666667	2.3	contour069	Song	2.3
20	1.83	same	same	CORRECT	11	60	-0.666667	0	contour003	Intermediate	0
21	4.102	diff	same	INCORRECT	11	60	-0.666667	0	contour104	Speech	0
22	3.274	diff	diff	CORRECT	11	60	-0.666667	-1.95	contour053	Speech	1.95
23	3.066	same	diff	INCORRECT	11	60	-0.666667	-5.84	contour113	Song	5.84
24	1.151	diff	diff	CORRECT	11	60	-0.666667	-5.05	contour042	Speech	5.05
25	1.116	same	same	CORRECT	11	60	-0.666667	0	contour039	Intermediate	0
26	1.237	diff	diff	CORRECT	11	60	-0.666667	8.58	contour048	Intermediate	8.58
27	1.338	same	same	CORRECT	11	60	-0.666667	0	contour111	Song	0
28	1.598	same	diff	INCORRECT	11	60	-0.666667	2.19	contour038	Speech	2.19
29	2.716	same	same	CORRECT	11	60	-0.666667	0	contour068	Intermediate	0
30	2.034	same	same	CORRECT	11	60	-0.666667	0	contour059	Speech	0
31	2.49	diff	diff	CORRECT	11	60	-0.666667	12.3	contour005	Speech	12.3
32	1.245	same	same	CORRECT	11	60	-0.666667	0	contour057	Intermediate	0
33	1.176	diff	diff	CORRECT	11	60	-0.666667	-8.6	contour171	Intermediate	8.6
34	2.253	same	diff	INCORRECT	11	60	-0.666667	-3.28	contour103	Speech	3.28
35	1.894	diff	diff	CORRECT	11	60	-0.666667	9.38	contour163	Song	9.38
36	1.153	same	same	CORRECT	11	60	-0.666667	0	contour146	Song	0
37	1.328	same	same	CORRECT	11	60	-0.666667	0	contour017	Intermediate	0
38	0.964	diff	diff	CORRECT	11	60	-0.666667	-6.42	contour032	Speech	6.42
39	1.721	same	same	CORRECT	11	60	-0.666667	0	contour054	Speech	0
40	1.874	same	same	CORRECT	11	60	-0.666667	0	contour160	Song	0
41	1.336	same	same	CORRECT	11	60	-0.666667	0	contour016	Song	0
42	2.561	diff	diff	CORRECT	11	60	-0.666667	-3.35	contour197	Speech	3.35
43	2.939	diff	diff	CORRECT	11	60	-0.666667	-5.3	contour057	Song	5.3
44	2.674	same	same	CORRECT	11	60	-0.666667	0	contour017	Song	0
45	0.88	diff	diff	CORRECT	11	60	-0.666667	16.36	contour164	Song	16.36
46	1.306	same	diff	INCORRECT	11	60	-0.666667	-6.86	contour060	Speech	6.86
47	1.965	diff	diff	CORRECT	11	60	-0.666667	5.85	contour059	Song	5.85
48	1.322	same	same	CORRECT	11	60	-0.666667	0	contour153	Intermediate	0
49	2.198	same	diff	INCORRECT	11	60	-0.666667	-1.59	contour011	Speech	1.59
50	1.689	diff	diff	CORRECT	11	60	-0.666667	17.54	contour048	Song	17.54
51	1.768	same	same	CORRECT	11	60	-0.666667	0	contour069	Intermediate	0
52	2.393	diff	diff	CORRECT	11	60	-0.666667	9.37	contour068	Song	9.37
53	1.607	same	same	CORRECT	11	60	-0.666667	0	contour146	Speech	0
54	3.091	same	diff	INCORRECT	11	60	-0.666667	2.73	contour104	Intermediate	2.73
55	3.082	diff	diff	CORRECT	11	60	-0.666667	19.02	contour053	Song	19.02
56	2.205	same	same	CORRECT	11	60	-0.666667	0	contour088	Speech	0
57	3.132	diff	diff	CORRECT	11	60	-0.666667	11.15	contour042	Intermediate	11.15
58	5.508	same	diff	INCORRECT	11	60	-0.666667	-8.2	contour005	Intermediate	8.2
59	1.629	diff	diff	CORRECT	11	60	-0.666667	-12.34	contour054	Song	12.34
60	1.096	same	same	CORRECT	11	60	-0.666667	0	contour034	Speech	0
61	0.995	same	same	CORRECT	11	60	-0.666667	0	contour147	Speech	0
62	2.69	diff	diff	CORRECT	11	60	-0.666667	9.25	contour032	Intermediate	9.25
63	1.855	diff	diff	CORRECT	11	60	-0.666667	-7.88	contour198	Song	7.88
64	0.999	same	same	CORRECT	11	60	-0.666667	0	contour065	Intermediate	0
65	0.834	same	same	CORRECT	11	60	-0.666667	0	contour038	Intermediate	0
66	1.738	same	same	CORRECT	11	60	-0.666667	0	contour036	Intermediate	0
67	2.428	same	diff	INCORRECT	11	60	-0.666667	-2.4	contour095	Speech	2.4
68	1.845	same	same	CORRECT	11	60	-0.666667	0	contour003	Speech	0
69	1.455	same	same	CORRECT	11	60	-0.666667	0	contour111	Intermediate	0
70	1.928	same	same	CORRECT	11	60	-0.666667	0	contour128	Speech	0
71	1.312	same	same	CORRECT	11	60	-0.666667	0	contour165	Intermediate	0
72	1.2	same	same	CORRECT	11	60	-0.666667	0	contour037	Intermediate	0
73	1.029	diff	diff	CORRECT	11	60	-0.666667	5.78	contour171	Speech	5.78
74	2.431	diff	diff	CORRECT	11	60	-0.666667	7.54	contour103	Intermediate	7.54
75	3.759	diff	diff	CORRECT	11	60	-0.666667	5.58	contour113	Intermediate	5.58
76	1.501	same	diff	INCORRECT	11	60	-0.666667	-8.78	contour117	Song	8.78
77	1.286	same	same	CORRECT	11	60	-0.666667	0	contour039	Speech	0
78	0.922	same	same	CORRECT	11	60	-0.666667	0	contour163	Intermediate	0
79	2.798	same	same	CORRECT	11	60	-0.666667	0	contour093	Song	0
80	1.8	diff	diff	CORRECT	11	60	-0.666667	14.9	contour059	Intermediate	14.9
81	1.013	same	same	CORRECT	11	60	-0.666667	0	contour146	Intermediate	0
82	1.039	same	same	CORRECT	11	60	-0.666667	0	contour069	Speech	0
83	1.38	diff	diff	CORRECT	11	60	-0.666667	-14.43	contour153	Song	14.43
84	1.308	diff	diff	CORRECT	11	60	-0.666667	-9.65	contour053	Intermediate	9.65
85	1.568	same	diff	INCORRECT	11	60	-0.666667	2.44	contour065	Speech	2.44
86	1.269	same	same	CORRECT	11	60	-0.666667	0	contour011	Intermediate	0
87	1.386	diff	diff	CORRECT	11	60	-0.666667	12.23	contour160	Intermediate	12.23
88	0.988	same	same	CORRECT	11	60	-0.666667	0	contour042	Song	0
89	2.761	same	diff	INCORRECT	11	60	-0.666667	2.93	contour095	Song	2.93
90	1.403	same	diff	INCORRECT	11	60	-0.666667	-5.6	contour057	Speech	5.6
91	1.496	same	same	CORRECT	11	60	-0.666667	0	contour048	Speech	0
92	7.07	diff	diff	CORRECT	11	60	-0.666667	14.62	contour117	Intermediate	14.62
93	1.362	same	same	CORRECT	11	60	-0.666667	0	contour003	Song	0
94	2.136	same	same	CORRECT	11	60	-0.666667	0	contour036	Speech	0
95	1.802	same	same	CORRECT	11	60	-0.666667	0	contour038	Song	0
96	1.333	diff	diff	CORRECT	11	60	-0.666667	6.28	contour171	Song	6.28
97	1.181	same	same	CORRECT	11	60	-0.666667	0	contour165	Speech	0
98	1.715	same	diff	INCORRECT	11	60	-0.666667	2.93	contour032	Song	2.93
99	1.207	same	same	CORRECT	11	60	-0.666667	0	contour034	Song	0
100	1.838	same	same	CORRECT	11	60	-0.666667	0	contour068	Speech	0
101	1.299	same	same	CORRECT	11	60	-0.666667	0	contour147	Intermediate	0
102	1.536	same	same	CORRECT	11	60	-0.666667	0	contour037	Song	0
103	1.118	same	diff	INCORRECT	11	60	-0.666667	5.85	contour104	Song	5.85
104	1.543	diff	diff	CORRECT	11	60	-0.666667	-5.99	contour164	Intermediate	5.99
105	2.381	diff	diff	CORRECT	11	60	-0.666667	12.3	contour093	Intermediate	12.3
106	1.355	diff	diff	CORRECT	11	60	-0.666667	13.16	contour054	Intermediate	13.16
107	1.238	same	diff	INCORRECT	11	60	-0.666667	-6.88	contour016	Speech	6.88
108	2.173	diff	same	INCORRECT	11	60	-0.666667	0	contour060	Intermediate	0
109	2.256	diff	diff	CORRECT	11	60	-0.666667	14.63	contour088	Song	14.63
110	1.076	same	same	CORRECT	11	60	-0.666667	0	contour111	Speech	0
111	1.194	same	same	CORRECT	11	60	-0.666667	0	contour017	Speech	0
112	1.556	same	same	CORRECT	11	60	-0.666667	0	contour197	Song	0
113	1.546	same	diff	INCORRECT	11	60	-0.666667	-2.92	contour039	Song	2.92
114	1.943	same	same	CORRECT	11	60	-0.666667	0	contour113	Speech	0
115	1.516	same	same	CORRECT	11	60	-0.666667	0	contour103	Song	0
116	1.733	diff	diff	CORRECT	11	60	-0.666667	-9.12	contour005	Song	9.12
117	1.313	same	same	CORRECT	11	60	-0.666667	0	contour128	Intermediate	0
118	0.898	diff	diff	CORRECT	11	60	-0.666667	17.51	contour198	Intermediate	17.51
119	1.661	same	diff	INCORRECT	11	60	-0.666667	-8.9	contour163	Speech	8.9
0	1.328	diff	diff	CORRECT	12	70	-1	5.85	contour104	Song	5.85
1	0.723	diff	diff	CORRECT	12	70	-1	2.3	contour069	Song	2.3
2	1.375	same	same	CORRECT	12	70	-1	0	contour004	Song	0
3	1.111	same	same	CORRECT	12	70	-1	0	contour011	Song	0
4	1.372	same	same	CORRECT	12	70	-1	0	contour103	Intermediate	0
5	1.491	same	same	CORRECT	12	70	-1	0	contour091	Speech	0
6	3.434	same	same	CORRECT	12	70	-1	0	contour052	Speech	0
7	1.353	diff	same	INCORRECT	12	70	-1	0	contour037	Intermediate	0
8	1.369	same	same	CORRECT	12	70	-1	0	contour035	Speech	0
9	1.756	diff	same	INCORRECT	12	70	-1	0	contour163	Intermediate	0
10	0.929	diff	diff	CORRECT	12	70	-1	14.63	contour182	Song	14.63
11	1.625	same	diff	INCORRECT	12	70	-1	-6.67	contour174	Speech	6.67
12	1.972	diff	diff	CORRECT	12	70	-1	-5.99	contour164	Intermediate	5.99
13	1.015	same	same	CORRECT	12	70	-1	0	contour171	Intermediate	0
14	2.016	same	diff	INCORRECT	12	70	-1	-8.83	contour048	Speech	8.83
15	2.15	same	diff	INCORRECT	12	70	-1	-10.74	contour046	Speech	10.74
16	2.062	same	same	CORRECT	12	70	-1	0	contour150	Song	0
17	1.121	diff	diff	CORRECT	12	70	-1	-3.4	contour039	Speech	3.4
18	1.212	diff	diff	CORRECT	12	70	-1	-8.92	contour088	Speech	8.92
19	1.338	same	same	CORRECT	12	70	-1	0	contour057	Song	0
20	1.009	diff	diff	CORRECT	12	70	-1	-2.98	contour099	Intermediate	2.98
21	1.738	same	same	CORRECT	12	70	-1	0	contour038	Song	0
22	1.815	diff	diff	CORRECT	12	70	-1	0	contour118	Song	0
23	2.739	same	diff	INCORRECT	12	70	-1	5.42	contour065	Intermediate	5.42
24	2.487	diff	same	INCORRECT	12	70	-1	0	contour010	Song	0
25	0.861	diff	diff	CORRECT	12	70	-1	-3.08	contour200	Intermediate	3.08
26	1.521	diff	diff	CORRECT	12	70	-1	2.75	contour114	Intermediate	2.75
27	0.918	diff	diff	CORRECT	12	70	-1	6.23	contour096	Speech	6.23
28	1.337	same	diff	INCORRECT	12	70	-1	-7.88	contour093	Song	7.88
29	1.42	same	same	CORRECT	12	70	-1	0	contour005	Speech	0
30	1.527	same	same	CORRECT	12	70	-1	0	contour162	Intermediate	0
31	1.158	diff	diff	CORRECT	12	70	-1	14.62	contour117	Intermediate	14.62
32	1.004	diff	diff	CORRECT	12	70	-1	-12.86	contour146	Song	12.86
33	1.687	same	same	CORRECT	12	70	-1	0	contour135	Song	0
34	1.625	diff	same	INCORRECT	12	70	-1	0	contour186	Song	0
35	1.038	diff	diff	CORRECT	12	70	-1	4.04	contour017	Speech	4.04
36	1.649	same	same	CORRECT	12	70	-1	0	contour124	Intermediate	0
37	1.652	diff	diff	CORRECT	12	70	-1	2.42	contour165	Speech	2.42
38	1.063	same	same	CORRECT	12	70	-1	0	contour027	Intermediate	0
39	3.388	same	same	CORRECT	12	70	-1	0	contour003	Intermediate	0
40	1.023	same	same	CORRECT	12	70	-1	0	contour165	Intermediate	0
41	1.546	diff	diff	CORRECT	12	70	-1	8.57	contour010	Intermediate	8.57
42	1.549	same	same	CORRECT	12	70	-1	0	contour093	Intermediate	0
43	1.112	same	same	CORRECT	12	70	-1	0	contour103	Speech	0
44	0.978	same	diff	INCORRECT	12	70	-1	-6.94	contour069	Speech	6.94
45	0.694	same	same	CORRECT	12	70	-1	0	contour118	Speech	0
46	1.07	diff	same	INCORRECT	12	70	-1	0	contour117	Song	0
47	1.752	diff	diff	CORRECT	12	70	-1	-9.12	contour005	Song	9.12
48	1.273	same	same	CORRECT	12	70	-1	0	contour124	Song	0
49	2.273	diff	diff	CORRECT	12	70	-1	-3.54	contour027	Speech	3.54
50	2.181	diff	diff	CORRECT	12	70	-1	14.79	contour096	Song	14.79
51	1.773	same	diff	INCORRECT	12	70	-1	5.85	contour171	Speech	5.85
52	1.066	same	same	CORRECT	12	70	-1	0	contour039	Intermediate	0
53	1.268	same	same	CORRECT	12	70	-1	0	contour046	Song	0
54	2.013	same	diff	INCORRECT	12	70	-1	2.5	contour065	Speech	2.5
55	1.005	same	same	CORRECT	12	70	-1	0	contour091	Intermediate	0
56	0.805	diff	diff	CORRECT	12	70	-1	5.74	contour037	Speech	5.74
57	1.608	diff	diff	CORRECT	12	70	-1	2.93	contour114	Song	2.93
58	0.658	same	same	CORRECT	12	70	-1	0	contour038	Intermediate	0
59	1.204	diff	same	INCORRECT	12	70	-1	0	contour135	Speech	0
60	0.907	diff	diff	CORRECT	12	70	-1	16.36	contour164	Song	16.36
61	2.276	diff	diff	CORRECT	12	70	-1	-5.85	contour017	Song	5.85
62	1.168	diff	diff	CORRECT	12	70	-1	5.75	contour162	Speech	5.75
63	1.386	same	same	CORRECT	12	70	-1	0	contour057	Speech	0
64	1.67	same	same	CORRECT	12	70	-1	0	contour088	Song	0
65	2.634	diff	same	INCORRECT	12	70	-1	0	contour163	Song	0
66	1.462	same	same	CORRECT	12	70	-1	0	contour048	Song	0
67	1.702	diff	diff	CORRECT	12	70	-1	17.88	contour146	Intermediate	17.88
68	1.397	diff	same	INCORRECT	12	70	-1	0	contour182	Intermediate	0
69	2.148	same	diff	INCORRECT	12	70	-1	-8.27	contour150	Speech	8.27
70	0.667	diff	diff	CORRECT	12	70	-1	2.22	contour104	Speech	2.22
71	1.346	same	same	CORRECT	12	70	-1	0	contour011	Speech	0
72	1.069	diff	same	INCORRECT	12	70	-1	0	contour186	Speech	0
73	1.587	diff	diff	CORRECT	12	70	-1	9.37	contour200	Song	9.37
74	1.871	same	diff	INCORRECT	12	70	-1	-10.11	contour004	Intermediate	10.11
75	1.282	same	same	CORRECT	12	70	-1	0	contour003	Song	0
76	1.065	same	diff	INCORRECT	12	70	-1	2.92	contour052	Song	2.92
77	1.941	same	same	CORRECT	12	70	-1	0	contour174	Song	0
78	0.854	diff	diff	CORRECT	12	70	-1	-2.92	contour035	Song	2.92
79	0.762	diff	diff	CORRECT	12	70	-1	-2.93	contour099	Song	2.93
80	1.244	same	same	CORRECT	12	70	-1	0	contour165	Song	0
81	1.268	diff	diff	CORRECT	12	70	-1	18.27	contour069	Intermediate	18.27
82	1.254	same	same	CORRECT	12	70	-1	0	contour104	Intermediate	0
83	1.062	diff	diff	CORRECT	12	70	-1	-3.37	contour114	Speech	3.37
84	0.725	diff	diff	CORRECT	12	70	-1	19.02	contour103	Song	19.02
85	1.367	diff	diff	CORRECT	12	70	-1	5.85	contour162	Song	5.85
86	1.851	same	same	CORRECT	12	70	-1	0	contour037	Song	0
87	0.994	same	same	CORRECT	12	70	-1	0	contour039	Song	0
88	0.976	same	same	CORRECT	12	70	-1	0	contour038	Speech	0
89	0.916	diff	diff	CORRECT	12	70	-1	-12.88	contour088	Intermediate	12.88
90	1.02	diff	diff	CORRECT	12	70	-1	-6.45	contour164	Speech	6.45
91	0.917	diff	diff	CORRECT	12	70	-1	6.28	contour171	Song	6.28
92	1.143	same	same	CORRECT	12	70	-1	0	contour096	Intermediate	0
93	1.745	same	same	CORRECT	12	70	-1	0	contour186	Intermediate	0
94	2.493	same	same	CORRECT	12	70	-1	0	contour003	Speech	0
95	1.97	same	diff	INCORRECT	12	70	-1	2.93	contour065	Song	2.93
96	1.048	same	same	CORRECT	12	70	-1	0	contour200	Speech	0
97	1.196	diff	same	INCORRECT	12	70	-1	0	contour017	Intermediate	0
98	0.603	diff	diff	CORRECT	12	70	-1	8.58	contour048	Intermediate	8.58
99	1.678	diff	same	INCORRECT	12	70	-1	0	contour091	Song	0
100	1.403	same	diff	INCORRECT	12	70	-1	3	contour046	Intermediate	3
101	1.119	diff	same	INCORRECT	12	70	-1	0	contour182	Speech	0
102	1.726	same	same	CORRECT	12	70	-1	0	contour117	Speech	0
103	0.883	diff	diff	CORRECT	12	70	-1	12.32	contour174	Intermediate	12.32
104	1.542	same	same	CORRECT	12	70	-1	0	contour118	Intermediate	0
105	1.747	same	diff	INCORRECT	12	70	-1	2.82	contour052	Intermediate	2.82
106	1.503	same	same	CORRECT	12	70	-1	0	contour146	Speech	0
107	1.305	same	same	CORRECT	12	70	-1	0	contour005	Intermediate	0
108	1.026	diff	diff	CORRECT	12	70	-1	5.76	contour099	Speech	5.76
109	1.029	diff	diff	CORRECT	12	70	-1	-11.53	contour093	Speech	11.53
110	1.702	diff	diff	CORRECT	12	70	-1	-5.61	contour057	Intermediate	5.61
111	1.207	diff	same	INCORRECT	12	70	-1	0	contour004	Speech	0
112	2.503	diff	diff	CORRECT	12	70	-1	-2.98	contour035	Intermediate	2.98
113	0.726	diff	diff	CORRECT	12	70	-1	5.75	contour124	Speech	5.75
114	1.325	same	diff	INCORRECT	12	70	-1	5.29	contour010	Speech	5.29
115	1.04	same	same	CORRECT	12	70	-1	0	contour027	Song	0
116	1.379	diff	same	INCORRECT	12	70	-1	0	contour163	Speech	0
117	0.652	diff	diff	CORRECT	12	70	-1	13.82	contour150	Intermediate	13.82
118	1.02	diff	diff	CORRECT	12	70	-1	-9.88	contour135	Intermediate	9.88
119	1.073	diff	same	INCORRECT	12	70	-1	0	contour011	Intermediate	0
0	1.85	diff	diff	CORRECT	13	62	-0.5	-10.4	contour124	Song	10.4
1	2.546	same	same	CORRECT	13	62	-0.5	0	contour157	Intermediate	0
2	1.68	same	same	CORRECT	13	62	-0.5	0	contour046	Song	0
3	1.313	diff	same	INCORRECT	13	62	-0.5	0	contour068	Intermediate	0
4	3.177	same	same	CORRECT	13	62	-0.5	0	contour077	Song	0
5	1.113	same	same	CORRECT	13	62	-0.5	0	contour150	Song	0
6	1.202	diff	diff	CORRECT	13	62	-0.5	-14.4	contour091	Intermediate	14.4
7	1.729	diff	diff	CORRECT	13	62	-0.5	-10.22	contour022	Intermediate	10.22
8	1.236	diff	diff	CORRECT	13	62	-0.5	5.85	contour104	Song	5.85
9	1.293	diff	diff	CORRECT	13	62	-0.5	14.27	contour182	Speech	14.27
10	1.183	same	same	CORRECT	13	62	-0.5	0	contour036	Song	0
11	1.566	same	diff	INCORRECT	13	62	-0.5	-1.98	contour054	Speech	1.98
12	1.186	same	same	CORRECT	13	62	-0.5	0	contour090	Speech	0
13	1.286	same	same	CORRECT	13	62	-0.5	0	contour049	Speech	0
14	1.757	same	diff	INCORRECT	13	62	-0.5	0	contour078	Speech	0
15	2.415	diff	diff	CORRECT	13	62	-0.5	12.32	contour174	Intermediate	12.32
16	1.629	diff	diff	CORRECT	13	62	-0.5	12.14	contour161	Speech	12.14
17	1.977	same	same	CORRECT	13	62	-0.5	0	contour004	Song	0
18	1.368	same	diff	INCORRECT	13	62	-0.5	-3.28	contour103	Speech	3.28
19	2.604	diff	same	INCORRECT	13	62	-0.5	0	contour018	Intermediate	0
20	1.386	diff	diff	CORRECT	13	62	-0.5	-8.96	contour117	Speech	8.96
21	1.203	same	diff	INCORRECT	13	62	-0.5	2.92	contour130	Song	2.92
22	0.968	same	same	CORRECT	13	62	-0.5	0	contour083	Intermediate	0
23	1.344	same	same	CORRECT	13	62	-0.5	0	contour016	Intermediate	0
24	1.426	same	same	CORRECT	13	62	-0.5	0	contour086	Speech	0
25	6.463	same	same	CORRECT	13	62	-0.5	0	contour198	Song	0
26	1.218	diff	diff	CORRECT	13	62	-0.5	16.36	contour164	Song	16.36
27	1.999	same	diff	INCORRECT	13	62	-0.5	-7.67	contour153	Speech	7.67
28	2.713	diff	same	INCORRECT	13	62	-0.5	0	contour137	Song	0
29	1.637	same	diff	INCORRECT	13	62	-0.5	5.85	contour162	Song	5.85
30	1.743	diff	diff	CORRECT	13	62	-0.5	16.56	contour034	Intermediate	16.56
31	1.75	same	same	CORRECT	13	62	-0.5	0	contour099	Intermediate	0
32	2.519	same	same	CORRECT	13	62	-0.5	0	contour085	Intermediate	0
33	1.217	diff	diff	CORRECT	13	62	-0.5	-1.95	contour053	Speech	1.95
34	1.7	same	diff	INCORRECT	13	62	-0.5	-3.41	contour133	Speech	3.41
35	1.527	same	same	CORRECT	13	62	-0.5	0	contour186	Song	0
36	1.596	same	diff	INCORRECT	13	62	-0.5	-2.42	contour095	Speech	2.42
37	1.469	same	same	CORRECT	13	62	-0.5	0	contour165	Speech	0
38	3.806	diff	same	INCORRECT	13	62	-0.5	0	contour082	Speech	0
39	1.59	diff	diff	CORRECT	13	62	-0.5	5.29	contour010	Speech	5.29
40	1.145	diff	diff	CORRECT	13	62	-0.5	-10.24	contour016	Song	10.24
41	1.116	diff	diff	CORRECT	13	62	-0.5	12.76	contour091	Speech	12.76
42	2.579	same	diff	INCORRECT	13	62	-0.5	0	contour161	Song	0
43	1.348	same	same	CORRECT	13	62	-0.5	0	contour099	Speech	0
44	0.821	diff	diff	CORRECT	13	62	-0.5	-12.34	contour054	Song	12.34
45	1.636	same	same	CORRECT	13	62	-0.5	0	contour124	Speech	0
46	0.987	diff	diff	CORRECT	13	62	-0.5	-9.65	contour053	Intermediate	9.65
47	1.347	same	diff	INCORRECT	13	62	-0.5	8.57	contour010	Intermediate	8.57
48	1.156	same	same	CORRECT	13	62	-0.5	0	contour018	Song	0
49	1.052	diff	diff	CORRECT	13	62	-0.5	-10.1	contour004	Intermediate	10.1
50	1.141	diff	diff	CORRECT	13	62	-0.5	6.29	contour082	Song	6.29
51	1.074	same	same	CORRECT	13	62	-0.5	0	contour078	Song	0
52	1.261	diff	diff	CORRECT	13	62	-0.5	-5.99	contour164	Intermediate	5.99
53	1.495	same	same	CORRECT	13	62	-0.5	0	contour077	Intermediate	0
54	1.217	same	same	CORRECT	13	62	-0.5	0	contour049	Intermediate	0
55	0.845	diff	diff	CORRECT	13	62	-0.5	11.43	contour137	Speech	11.43
56	0.911	same	same	CORRECT	13	62	-0.5	0	contour153	Song	0
57	1.183	same	same	CORRECT	13	62	-0.5	0	contour046	Speech	0
58	2.19	diff	diff	CORRECT	13	62	-0.5	9.37	contour034	Song	9.37
59	1.137	diff	diff	CORRECT	13	62	-0.5	9.37	contour068	Song	9.37
60	1.228	diff	diff	CORRECT	13	62	-0.5	-7.89	contour095	Intermediate	7.89
61	1.465	same	same	CORRECT	13	62	-0.5	0	contour182	Song	0
62	3.204	same	diff	INCORRECT	13	62	-0.5	-6.09	contour086	Intermediate	6.09
63	1.556	same	same	CORRECT	13	62	-0.5	0	contour162	Speech	0
64	1.09	diff	diff	CORRECT	13	62	-0.5	7.54	contour103	Intermediate	7.54
65	1.125	same	same	CORRECT	13	62	-0.5	0	contour130	Intermediate	0
66	1.038	same	same	CORRECT	13	62	-0.5	0	contour083	Song	0
67	3.956	same	same	CORRECT	13	62	-0.5	0	contour133	Intermediate	0
68	1.924	diff	same	INCORRECT	13	62	-0.5	0	contour104	Intermediate	0
69	4.054	diff	diff	CORRECT	13	62	-0.5	-5.3	contour174	Song	5.3
70	1.043	same	diff	INCORRECT	13	62	-0.5	-7.14	contour022	Speech	7.14
71	1.3	diff	same	INCORRECT	13	62	-0.5	0	contour036	Intermediate	0
72	1.567	same	same	CORRECT	13	62	-0.5	0	contour085	Speech	0
73	2.325	same	diff	INCORRECT	13	62	-0.5	-9.04	contour165	Intermediate	9.04
74	1.298	diff	diff	CORRECT	13	62	-0.5	13.82	contour150	Intermediate	13.82
75	2.315	diff	same	INCORRECT	13	62	-0.5	0	contour117	Intermediate	0
76	1.839	same	same	CORRECT	13	62	-0.5	0	contour157	Song	0
77	1.314	diff	diff	CORRECT	13	62	-0.5	14.79	contour090	Song	14.79
78	2.101	same	same	CORRECT	13	62	-0.5	0	contour198	Intermediate	0
79	1.056	same	same	CORRECT	13	62	-0.5	0	contour186	Speech	0
80	1.325	same	same	CORRECT	13	62	-0.5	0	contour054	Intermediate	0
81	3.152	diff	same	INCORRECT	13	62	-0.5	0	contour153	Intermediate	0
82	1.345	same	diff	INCORRECT	13	62	-0.5	5.31	contour083	Speech	5.31
83	1.42	diff	same	INCORRECT	13	62	-0.5	0	contour117	Song	0
84	1.857	same	same	CORRECT	13	62	-0.5	0	contour036	Speech	0
85	1.18	same	same	CORRECT	13	62	-0.5	0	contour085	Song	0
86	1.483	same	same	CORRECT	13	62	-0.5	0	contour049	Song	0
87	0.883	diff	diff	CORRECT	13	62	-0.5	0	contour186	Intermediate	0
88	1.321	diff	diff	CORRECT	13	62	-0.5	-8.7	contour082	Intermediate	8.7
89	1.498	same	same	CORRECT	13	62	-0.5	0	contour091	Song	0
90	3.317	same	same	CORRECT	13	62	-0.5	0	contour068	Speech	0
91	2.029	diff	same	INCORRECT	13	62	-0.5	0	contour053	Song	0
92	4.114	same	diff	INCORRECT	13	62	-0.5	-3.24	contour137	Intermediate	3.24
93	1.763	diff	diff	CORRECT	13	62	-0.5	-2.93	contour099	Song	2.93
94	1.549	same	same	CORRECT	13	62	-0.5	0	contour034	Speech	0
95	4.431	same	diff	INCORRECT	13	62	-0.5	0	contour022	Song	0
96	4.36	same	same	CORRECT	13	62	-0.5	0	contour090	Intermediate	0
97	1.191	diff	diff	CORRECT	13	62	-0.5	17.35	contour198	Speech	17.35
98	2.186	same	diff	INCORRECT	13	62	-0.5	3	contour046	Intermediate	3
99	1.413	diff	diff	CORRECT	13	62	-0.5	0	contour182	Intermediate	0
100	2.627	same	same	CORRECT	13	62	-0.5	0	contour124	Intermediate	0
101	2.711	same	same	CORRECT	13	62	-0.5	0	contour078	Intermediate	0
102	1.367	diff	diff	CORRECT	13	62	-0.5	9.38	contour133	Song	9.38
103	1.096	same	same	CORRECT	13	62	-0.5	0	contour095	Song	0
104	1.446	same	diff	INCORRECT	13	62	-0.5	-6.45	contour164	Speech	6.45
105	2.13	same	same	CORRECT	13	62	-0.5	0	contour004	Speech	0
106	1.269	same	diff	INCORRECT	13	62	-0.5	2.22	contour104	Speech	2.22
107	0.952	same	same	CORRECT	13	62	-0.5	0	contour010	Song	0
108	0.796	diff	diff	CORRECT	13	62	-0.5	-8.6	contour157	Speech	8.6
109	1.508	same	same	CORRECT	13	62	-0.5	0	contour016	Speech	0
110	2.08	diff	same	INCORRECT	13	62	-0.5	0	contour161	Intermediate	0
111	2.671	diff	diff	CORRECT	13	62	-0.5	-8.26	contour150	Speech	8.26
112	3.348	same	same	CORRECT	13	62	-0.5	0	contour103	Song	0
113	4.08	same	diff	INCORRECT	13	62	-0.5	-8.55	contour077	Speech	8.55
114	4.823	diff	diff	CORRECT	13	62	-0.5	2.93	contour165	Song	2.93
115	3.878	diff	diff	CORRECT	13	62	-0.5	9.15	contour018	Speech	9.15
116	2.788	same	diff	INCORRECT	13	62	-0.5	-10.14	contour130	Speech	10.14
117	10.07	diff	diff	CORRECT	13	62	-0.5	-3.33	contour162	Intermediate	3.33
118	2.389	same	diff	INCORRECT	13	62	-0.5	-2.92	contour086	Song	2.92
119	1.444	same	same	CORRECT	13	62	-0.5	0	contour174	Speech	0
0	1.526	diff	diff	CORRECT	14	87	-1	-5.85	contour017	Song	5.85
1	1.027	same	same	CORRECT	14	87	-1	0	contour161	Intermediate	0
2	0.836	diff	diff	CORRECT	14	87	-1	7.52	contour200	Speech	7.52
3	0.997	same	same	CORRECT	14	87	-1	0	contour109	Speech	0
4	3.047	same	same	CORRECT	14	87	-1	0	contour128	Intermediate	0
5	1.153	diff	diff	CORRECT	14	87	-1	6.29	contour037	Song	6.29
6	1.061	same	same	CORRECT	14	87	-1	0	contour147	Intermediate	0
7	1.14	diff	diff	CORRECT	14	87	-1	-12.34	contour054	Song	12.34
8	1.187	diff	diff	CORRECT	14	87	-1	2.93	contour032	Song	2.93
9	1.065	diff	diff	CORRECT	14	87	-1	-8.85	contour047	Intermediate	8.85
10	1.79	same	same	CORRECT	14	87	-1	0	contour104	Speech	0
11	1.563	diff	same	INCORRECT	14	87	-1	0	contour011	Speech	0
12	1.937	diff	diff	CORRECT	14	87	-1	-11.38	contour118	Intermediate	11.38
13	1.511	same	same	CORRECT	14	87	-1	0	contour052	Intermediate	0
14	0.959	same	same	CORRECT	14	87	-1	0	contour171	Intermediate	0
15	1.115	same	same	CORRECT	14	87	-1	0	contour010	Intermediate	0
16	1.163	diff	diff	CORRECT	14	87	-1	9.37	contour068	Song	9.37
17	1.338	same	diff	INCORRECT	14	87	-1	0	contour064	Song	0
18	1.113	diff	diff	CORRECT	14	87	-1	9.75	contour086	Speech	9.75
19	1.209	same	same	CORRECT	14	87	-1	0	contour163	Intermediate	0
20	2.973	same	same	CORRECT	14	87	-1	0	contour133	Intermediate	0
21	1.111	same	same	CORRECT	14	87	-1	0	contour114	Intermediate	0
22	1.806	same	same	CORRECT	14	87	-1	0	contour065	Speech	0
23	1.32	diff	same	INCORRECT	14	87	-1	0	contour165	Song	0
24	1.131	same	same	CORRECT	14	87	-1	0	contour090	Intermediate	0
25	1.256	same	same	CORRECT	14	87	-1	0	contour083	Speech	0
26	1.148	same	diff	INCORRECT	14	87	-1	0	contour155	Intermediate	0
27	1.351	same	diff	INCORRECT	14	87	-1	-11.6	contour093	Speech	11.6
28	1.34	same	same	CORRECT	14	87	-1	0	contour027	Intermediate	0
29	1.059	diff	diff	CORRECT	14	87	-1	-10.13	contour130	Speech	10.13
30	1.212	diff	diff	CORRECT	14	87	-1	17.54	contour048	Song	17.54
31	2.254	same	same	CORRECT	14	87	-1	0	contour003	Intermediate	0
32	1.602	diff	diff	CORRECT	14	87	-1	13.21	contour194	Song	13.21
33	1.989	diff	diff	CORRECT	14	87	-1	-5.61	contour057	Intermediate	5.61
34	1.353	diff	diff	CORRECT	14	87	-1	17.5	contour198	Intermediate	17.5
35	1.79	diff	diff	CORRECT	14	87	-1	-10.32	contour131	Intermediate	10.32
36	1.271	diff	diff	CORRECT	14	87	-1	9.59	contour152	Intermediate	9.59
37	1.206	same	same	CORRECT	14	87	-1	0	contour119	Intermediate	0
38	1.161	same	same	CORRECT	14	87	-1	0	contour022	Speech	0
39	2.563	diff	diff	CORRECT	14	87	-1	5.73	contour004	Speech	5.73
40	1.21	diff	diff	CORRECT	14	87	-1	-10.11	contour004	Intermediate	10.11
41	2.055	diff	diff	CORRECT	14	87	-1	9.38	contour163	Song	9.38
42	1.511	same	same	CORRECT	14	87	-1	0	contour130	Intermediate	0
43	3.941	same	same	CORRECT	14	87	-1	0	contour104	Song	0
44	0.926	same	same	CORRECT	14	87	-1	0	contour027	Song	0
45	8.332	diff	diff	CORRECT	14	87	-1	12.44	contour155	Song	12.44
46	1.516	diff	diff	CORRECT	14	87	-1	13.24	contour090	Speech	13.24
47	1.109	diff	diff	CORRECT	14	87	-1	6.53	contour118	Speech	6.53
48	1.208	diff	diff	CORRECT	14	87	-1	-3.08	contour200	Intermediate	3.08
49	1.622	diff	diff	CORRECT	14	87	-1	6.46	contour003	Speech	6.46
50	1.466	diff	same	INCORRECT	14	87	-1	0	contour119	Song	0
51	4.546	diff	same	INCORRECT	14	87	-1	0	contour032	Intermediate	0
52	1.284	diff	diff	CORRECT	14	87	-1	4.04	contour017	Speech	4.04
53	1.962	diff	diff	CORRECT	14	87	-1	-2.93	contour083	Song	2.93
54	1.183	same	same	CORRECT	14	87	-1	0	contour086	Song	0
55	1.001	same	same	CORRECT	14	87	-1	0	contour048	Speech	0
56	1.71	same	same	CORRECT	14	87	-1	0	contour037	Speech	0
57	2.66	same	same	CORRECT	14	87	-1	0	contour128	Speech	0
58	2.749	same	diff	INCORRECT	14	87	-1	2.92	contour052	Song	2.92
59	1.184	same	same	CORRECT	14	87	-1	0	contour171	Song	0
60	2.341	same	same	CORRECT	14	87	-1	0	contour133	Speech	0
61	1.469	diff	diff	CORRECT	14	87	-1	0	contour022	Song	0
62	1.474	same	same	CORRECT	14	87	-1	0	contour065	Intermediate	0
63	2.363	diff	same	INCORRECT	14	87	-1	0	contour011	Song	0
64	2.007	diff	diff	CORRECT	14	87	-1	0	contour064	Intermediate	0
65	4.247	diff	diff	CORRECT	14	87	-1	2.42	contour165	Speech	2.42
66	1.712	same	diff	INCORRECT	14	87	-1	-1.98	contour054	Speech	1.98
67	0.989	same	same	CORRECT	14	87	-1	0	contour010	Speech	0
68	1.627	same	same	CORRECT	14	87	-1	0	contour198	Song	0
69	0.921	same	same	CORRECT	14	87	-1	0	contour057	Speech	0
70	1.158	diff	diff	CORRECT	14	87	-1	-11.23	contour131	Song	11.23
71	2.358	same	same	CORRECT	14	87	-1	0	contour152	Song	0
72	1.518	same	same	CORRECT	14	87	-1	0	contour109	Intermediate	0
73	1.138	diff	diff	CORRECT	14	87	-1	12.3	contour093	Intermediate	12.3
74	2.95	same	diff	INCORRECT	14	87	-1	-3.37	contour114	Speech	3.37
75	1.535	diff	diff	CORRECT	14	87	-1	-10.4	contour147	Song	10.4
76	1.341	diff	diff	CORRECT	14	87	-1	8.48	contour068	Intermediate	8.48
77	1.863	diff	diff	CORRECT	14	87	-1	19.02	contour047	Song	19.02
78	1.274	same	same	CORRECT	14	87	-1	0	contour161	Speech	0
79	1.273	same	same	CORRECT	14	87	-1	0	contour194	Intermediate	0
80	1.112	same	same	CORRECT	14	87	-1	0	contour003	Song	0
81	0.999	diff	same	INCORRECT	14	87	-1	0	contour163	Speech	0
82	1.116	diff	diff	CORRECT	14	87	-1	-9.04	contour165	Intermediate	9.04
83	1.829	same	same	CORRECT	14	87	-1	0	contour104	Intermediate	0
84	1.382	diff	diff	CORRECT	14	87	-1	2.61	contour037	Intermediate	2.61
85	0.87	diff	diff	CORRECT	14	87	-1	9.38	contour133	Song	9.38
86	2.29	same	diff	INCORRECT	14	87	-1	0	contour128	Song	0
87	1.367	same	same	CORRECT	14	87	-1	0	contour130	Song	0
88	1.372	same	same	CORRECT	14	87	-1	0	contour118	Song	0
89	1.499	same	same	CORRECT	14	87	-1	0	contour131	Speech	0
90	2.138	diff	diff	CORRECT	14	87	-1	2.93	contour114	Song	2.93
91	1.237	diff	diff	CORRECT	14	87	-1	13.16	contour054	Intermediate	13.16
92	1.78	diff	same	INCORRECT	14	87	-1	0	contour057	Song	0
93	2.262	diff	diff	CORRECT	14	87	-1	2.93	contour065	Song	2.93
94	2.201	diff	same	INCORRECT	14	87	-1	0	contour093	Song	0
95	1.488	same	same	CORRECT	14	87	-1	0	contour147	Speech	0
96	1.308	diff	diff	CORRECT	14	87	-1	9.37	contour200	Song	9.37
97	1.25	diff	diff	CORRECT	14	87	-1	-6.09	contour086	Intermediate	6.09
98	1.094	diff	diff	CORRECT	14	87	-1	-2.93	contour109	Song	2.93
99	1.587	same	same	CORRECT	14	87	-1	0	contour052	Speech	0
100	1.874	same	same	CORRECT	14	87	-1	0	contour047	Speech	0
101	1.025	diff	diff	CORRECT	14	87	-1	5.78	contour171	Speech	5.78
102	1.377	same	same	CORRECT	14	87	-1	0	contour155	Speech	0
103	1.01	same	same	CORRECT	14	87	-1	0	contour064	Speech	0
104	1.291	diff	diff	CORRECT	14	87	-1	7.03	contour152	Speech	7.03
105	1.317	same	diff	INCORRECT	14	87	-1	0	contour161	Song	0
106	1.123	diff	diff	CORRECT	14	87	-1	14.23	contour068	Speech	14.23
107	1.902	same	same	CORRECT	14	87	-1	0	contour194	Speech	0
108	0.925	diff	diff	CORRECT	14	87	-1	14.79	contour090	Song	14.79
109	1.124	same	same	CORRECT	14	87	-1	0	contour198	Speech	0
110	3.143	same	same	CORRECT	14	87	-1	0	contour083	Intermediate	0
111	1.016	same	same	CORRECT	14	87	-1	0	contour004	Song	0
112	1.624	diff	diff	CORRECT	14	87	-1	8.46	contour011	Intermediate	8.46
113	4.013	diff	diff	CORRECT	14	87	-1	-10.22	contour022	Intermediate	10.22
114	1.622	diff	diff	CORRECT	14	87	-1	-3.54	contour027	Speech	3.54
115	2.023	same	same	CORRECT	14	87	-1	0	contour119	Speech	0
116	1.035	diff	same	INCORRECT	14	87	-1	0	contour017	Intermediate	0
117	1.467	diff	diff	CORRECT	14	87	-1	8.58	contour048	Intermediate	8.58
118	1.413	same	same	CORRECT	14	87	-1	0	contour032	Speech	0
119	1.644	diff	diff	CORRECT	14	87	-1	6.29	contour010	Song	6.29
0	1.803	same	diff	INCORRECT	15	85	-0.833333	-3.24	contour137	Intermediate	3.24
1	1.401	same	same	CORRECT	15	85	-0.833333	0	contour037	Song	0
2	1.637	diff	diff	CORRECT	15	85	-0.833333	-5.84	contour113	Song	5.84
3	1.393	diff	same	INCORRECT	15	85	-0.833333	0	contour165	Song	0
4	4.252	same	same	CORRECT	15	85	-0.833333	0	contour117	Speech	0
5	1.594	same	same	CORRECT	15	85	-0.833333	0	contour049	Intermediate	0
6	1.8	same	same	CORRECT	15	85	-0.833333	0	contour060	Speech	0
7	2.061	diff	same	INCORRECT	15	85	-0.833333	0	contour075	Song	0
8	1.22	diff	diff	CORRECT	15	85	-0.833333	9.38	contour163	Song	9.38
9	2.038	diff	diff	CORRECT	15	85	-0.833333	2.73	contour104	Intermediate	2.73
10	1.373	same	same	CORRECT	15	85	-0.833333	0	contour005	Speech	0
11	2.311	same	diff	INCORRECT	15	85	-0.833333	0	contour186	Song	0
12	1.705	same	same	CORRECT	15	85	-0.833333	0	contour057	Speech	0
13	2.699	same	same	CORRECT	15	85	-0.833333	0	contour131	Intermediate	0
14	1.618	same	same	CORRECT	15	85	-0.833333	0	contour039	Song	0
15	1.701	same	same	CORRECT	15	85	-0.833333	0	contour091	Intermediate	0
16	2.948	diff	diff	CORRECT	15	85	-0.833333	-5.36	contour126	Intermediate	5.36
17	1.401	same	same	CORRECT	15	85	-0.833333	0	contour119	Speech	0
18	1.432	diff	diff	CORRECT	15	85	-0.833333	-10.4	contour111	Song	10.4
19	3.719	diff	diff	CORRECT	15	85	-0.833333	3	contour046	Intermediate	3
20	1.405	same	same	CORRECT	15	85	-0.833333	0	contour068	Intermediate	0
21	1.423	diff	diff	CORRECT	15	85	-0.833333	-5.3	contour174	Song	5.3
22	2.633	diff	diff	CORRECT	15	85	-0.833333	4.04	contour017	Speech	4.04
23	1.528	same	same	CORRECT	15	85	-0.833333	0	contour088	Speech	0
24	3.187	diff	diff	CORRECT	15	85	-0.833333	-8.11	contour128	Intermediate	8.11
25	3.8	diff	diff	CORRECT	15	85	-0.833333	17.35	contour198	Speech	17.35
26	1.659	same	same	CORRECT	15	85	-0.833333	0	contour109	Intermediate	0
27	2.71	diff	diff	CORRECT	15	85	-0.833333	-9.14	contour135	Song	9.14
28	1.699	diff	diff	CORRECT	15	85	-0.833333	-1.98	contour054	Speech	1.98
29	1.716	diff	diff	CORRECT	15	85	-0.833333	9.37	contour034	Song	9.37
30	2.936	same	same	CORRECT	15	85	-0.833333	0	contour178	Song	0
31	1.806	same	same	CORRECT	15	85	-0.833333	0	contour167	Song	0
32	1.683	same	same	CORRECT	15	85	-0.833333	0	contour032	Speech	0
33	1.488	diff	diff	CORRECT	15	85	-0.833333	11.45	contour153	Intermediate	11.45
34	1.834	same	diff	INCORRECT	15	85	-0.833333	-6.88	contour016	Speech	6.88
35	1.467	diff	diff	CORRECT	15	85	-0.833333	5.85	contour059	Song	5.85
36	1.355	diff	diff	CORRECT	15	85	-0.833333	-2.92	contour042	Song	2.92
37	1.637	diff	same	INCORRECT	15	85	-0.833333	0	contour027	Song	0
38	3.688	diff	diff	CORRECT	15	85	-0.833333	2.93	contour065	Song	2.93
39	1.432	same	same	CORRECT	15	85	-0.833333	0	contour133	Song	0
40	1.763	same	same	CORRECT	15	85	-0.833333	0	contour005	Intermediate	0
41	1.203	same	same	CORRECT	15	85	-0.833333	0	contour017	Intermediate	0
42	1.266	diff	diff	CORRECT	15	85	-0.833333	2.93	contour032	Song	2.93
43	1.846	same	same	CORRECT	15	85	-0.833333	0	contour198	Song	0
44	1.468	same	diff	INCORRECT	15	85	-0.833333	0	contour109	Speech	0
45	7.442	diff	same	INCORRECT	15	85	-0.833333	0	contour027	Intermediate	0
46	0.898	diff	diff	CORRECT	15	85	-0.833333	14.62	contour117	Intermediate	14.62
47	1.049	same	same	CORRECT	15	85	-0.833333	0	contour174	Speech	0
48	1.763	diff	diff	CORRECT	15	85	-0.833333	-7.71	contour153	Speech	7.71
49	1.725	same	same	CORRECT	15	85	-0.833333	0	contour167	Intermediate	0
50	1.345	same	diff	INCORRECT	15	85	-0.833333	-2.93	contour137	Song	2.93
51	4.092	diff	diff	CORRECT	15	85	-0.833333	-5.3	contour057	Song	5.3
52	1.392	same	same	CORRECT	15	85	-0.833333	0	contour119	Intermediate	0
53	1.483	same	diff	INCORRECT	15	85	-0.833333	-5.12	contour126	Speech	5.12
54	4.317	diff	diff	CORRECT	15	85	-0.833333	-8.9	contour163	Speech	8.9
55	8.642	diff	diff	CORRECT	15	85	-0.833333	-8.24	contour049	Speech	8.24
56	1.145	same	diff	INCORRECT	15	85	-0.833333	-5.69	contour186	Speech	5.69
57	1.309	same	same	CORRECT	15	85	-0.833333	0	contour046	Speech	0
58	1.836	same	same	CORRECT	15	85	-0.833333	0	contour042	Intermediate	0
59	1.637	same	same	CORRECT	15	85	-0.833333	0	contour088	Song	0
60	1.046	diff	diff	CORRECT	15	85	-0.833333	-10.24	contour016	Song	10.24
61	1.825	same	same	CORRECT	15	85	-0.833333	0	contour034	Speech	0
62	0.926	diff	diff	CORRECT	15	85	-0.833333	14.9	contour059	Intermediate	14.9
63	1.456	same	diff	INCORRECT	15	85	-0.833333	0	contour128	Song	0
64	1.078	same	same	CORRECT	15	85	-0.833333	0	contour091	Speech	0
65	11.718	same	diff	INCORRECT	15	85	-0.833333	4.71	contour113	Speech	4.71
66	2.551	diff	same	INCORRECT	15	85	-0.833333	0	contour054	Intermediate	0
67	1.199	diff	diff	CORRECT	15	85	-0.833333	9.37	contour068	Song	9.37
68	1.097	diff	diff	CORRECT	15	85	-0.833333	16.31	contour060	Intermediate	16.31
69	1.584	same	same	CORRECT	15	85	-0.833333	0	contour075	Intermediate	0
70	1.578	same	same	CORRECT	15	85	-0.833333	0	contour178	Speech	0
71	5.164	same	same	CORRECT	15	85	-0.833333	0	contour039	Speech	0
72	1.423	diff	diff	CORRECT	15	85	-0.833333	2.44	contour165	Speech	2.44
73	0.97	same	same	CORRECT	15	85	-0.833333	0	contour111	Intermediate	0
74	2.362	diff	diff	CORRECT	15	85	-0.833333	-9.88	contour135	Intermediate	9.88
75	2.623	same	same	CORRECT	15	85	-0.833333	0	contour133	Intermediate	0
76	3.927	same	same	CORRECT	15	85	-0.833333	0	contour037	Intermediate	0
77	1.412	same	same	CORRECT	15	85	-0.833333	0	contour065	Intermediate	0
78	0.6	diff	diff	CORRECT	15	85	-0.833333	2.22	contour104	Speech	2.22
79	1.656	diff	diff	CORRECT	15	85	-0.833333	5.35	contour131	Speech	5.35
80	1.553	same	same	CORRECT	15	85	-0.833333	0	contour137	Speech	0
81	0.932	diff	diff	CORRECT	15	85	-0.833333	5.58	contour113	Intermediate	5.58
82	1.179	same	same	CORRECT	15	85	-0.833333	0	contour111	Speech	0
83	1.416	same	diff	INCORRECT	15	85	-0.833333	-7.88	contour049	Song	7.88
84	1.169	diff	diff	CORRECT	15	85	-0.833333	-12.34	contour054	Song	12.34
85	0.949	diff	diff	CORRECT	15	85	-0.833333	-14.43	contour153	Song	14.43
86	1.332	same	same	CORRECT	15	85	-0.833333	0	contour075	Speech	0
87	1.496	same	same	CORRECT	15	85	-0.833333	0	contour178	Intermediate	0
88	1.201	diff	diff	CORRECT	15	85	-0.833333	8.64	contour059	Speech	8.64
89	1.423	diff	diff	CORRECT	15	85	-0.833333	-5.85	contour017	Song	5.85
90	0.964	diff	diff	CORRECT	15	85	-0.833333	5.74	contour037	Speech	5.74
91	10.735	same	diff	INCORRECT	15	85	-0.833333	5.85	contour104	Song	5.85
92	1.613	same	same	CORRECT	15	85	-0.833333	0	contour165	Intermediate	0
93	0.993	diff	diff	CORRECT	15	85	-0.833333	16.99	contour126	Song	16.99
94	3.594	diff	diff	CORRECT	15	85	-0.833333	-3.54	contour027	Speech	3.54
95	0.795	diff	diff	CORRECT	15	85	-0.833333	9.25	contour032	Intermediate	9.25
96	1.323	diff	diff	CORRECT	15	85	-0.833333	-9.12	contour005	Song	9.12
97	1.391	diff	diff	CORRECT	15	85	-0.833333	14.23	contour068	Speech	14.23
98	1.704	same	same	CORRECT	15	85	-0.833333	0	contour135	Speech	0
99	1.311	same	same	CORRECT	15	85	-0.833333	0	contour163	Intermediate	0
100	1.272	same	same	CORRECT	15	85	-0.833333	0	contour065	Speech	0
101	1.841	same	same	CORRECT	15	85	-0.833333	0	contour042	Speech	0
102	1.382	same	same	CORRECT	15	85	-0.833333	0	contour174	Intermediate	0
103	1.213	diff	diff	CORRECT	15	85	-0.833333	-8.78	contour117	Song	8.78
104	4.439	same	same	CORRECT	15	85	-0.833333	0	contour060	Song	0
105	6.011	same	same	CORRECT	15	85	-0.833333	0	contour131	Song	0
106	9.757	diff	same	INCORRECT	15	85	-0.833333	0	contour198	Intermediate	0
107	1.003	diff	diff	CORRECT	15	85	-0.833333	-6.68	contour167	Speech	6.68
108	2.491	same	same	CORRECT	15	85	-0.833333	0	contour091	Song	0
109	1.705	same	same	CORRECT	15	85	-0.833333	0	contour088	Intermediate	0
110	2.056	diff	diff	CORRECT	15	85	-0.833333	-3.44	contour133	Speech	3.44
111	1.721	same	same	CORRECT	15	85	-0.833333	0	contour046	Song	0
112	0.789	diff	diff	CORRECT	15	85	-0.833333	-2.93	contour109	Song	2.93
113	1.244	diff	diff	CORRECT	15	85	-0.833333	2.76	contour039	Intermediate	2.76
114	5.277	diff	same	INCORRECT	15	85	-0.833333	0	contour128	Speech	0
115	3.758	same	same	CORRECT	15	85	-0.833333	0	contour016	Intermediate	0
116	4.866	same	same	CORRECT	15	85	-0.833333	0	contour057	Intermediate	0
117	1.273	same	same	CORRECT	15	85	-0.833333	0	contour186	Intermediate	0
118	1.054	diff	diff	CORRECT	15	85	-0.833333	13.2	contour119	Song	13.2
119	1.292	diff	diff	CORRECT	15	85	-0.833333	16.56	contour034	Intermediate	16.56
0	1.348	same	same	CORRECT	16	93	-1	0	contour099	Intermediate	0
1	1.278	same	diff	INCORRECT	16	93	-1	2.82	contour052	Intermediate	2.82
2	1.052	same	same	CORRECT	16	93	-1	0	contour155	Intermediate	0
3	1.297	same	same	CORRECT	16	93	-1	0	contour168	Intermediate	0
4	0.939	diff	diff	CORRECT	16	93	-1	-7.89	contour095	Intermediate	7.89
5	1.061	same	same	CORRECT	16	93	-1	0	contour160	Song	0
6	1.046	same	same	CORRECT	16	93	-1	0	contour135	Speech	0
7	0.722	same	same	CORRECT	16	93	-1	0	contour163	Song	0
8	0.956	diff	diff	CORRECT	16	93	-1	-2.93	contour083	Song	2.93
9	1.075	diff	diff	CORRECT	16	93	-1	-5.85	contour091	Song	5.85
10	0.709	same	same	CORRECT	16	93	-1	0	contour161	Speech	0
11	1.175	same	same	CORRECT	16	93	-1	0	contour086	Song	0
12	1.138	diff	diff	CORRECT	16	93	-1	5.85	contour110	Song	5.85
13	1.082	same	same	CORRECT	16	93	-1	0	contour103	Intermediate	0
14	1.914	same	same	CORRECT	16	93	-1	0	contour071	Speech	0
15	2.758	same	same	CORRECT	16	93	-1	0	contour186	Song	0
16	0.953	diff	diff	CORRECT	16	93	-1	13.24	contour090	Speech	13.24
17	1.114	diff	same	INCORRECT	16	93	-1	0	contour126	Speech	0
18	0.937	diff	diff	CORRECT	16	93	-1	-11.38	contour118	Intermediate	11.38
19	8.517	same	diff	INCORRECT	16	93	-1	-2.93	contour197	Song	2.93
20	1.619	same	same	CORRECT	16	93	-1	0	contour048	Speech	0
21	1.413	diff	diff	CORRECT	16	93	-1	-2.93	contour137	Song	2.93
22	1.023	diff	diff	CORRECT	16	93	-1	-5.3	contour057	Song	5.3
23	0.742	diff	same	INCORRECT	16	93	-1	0	contour146	Song	0
24	0.762	diff	diff	CORRECT	16	93	-1	9.15	contour018	Speech	9.15
25	1.468	same	same	CORRECT	16	93	-1	0	contour059	Song	0
26	1.138	diff	diff	CORRECT	16	93	-1	11.45	contour153	Intermediate	11.45
27	1.048	diff	diff	CORRECT	16	93	-1	-10.14	contour130	Speech	10.14
28	1.141	diff	diff	CORRECT	16	93	-1	-8.61	contour035	Speech	8.61
29	0.832	diff	diff	CORRECT	16	93	-1	18.27	contour069	Intermediate	18.27
30	1.657	same	same	CORRECT	16	93	-1	0	contour010	Intermediate	0
31	1.159	same	diff	INCORRECT	16	93	-1	0	contour111	Intermediate	0
32	1.021	same	same	CORRECT	16	93	-1	0	contour022	Song	0
33	1.012	diff	diff	CORRECT	16	93	-1	16.31	contour060	Intermediate	16.31
34	1.176	same	same	CORRECT	16	93	-1	0	contour034	Intermediate	0
35	1.268	same	same	CORRECT	16	93	-1	0	contour114	Song	0
36	1.15	diff	diff	CORRECT	16	93	-1	-3.09	contour123	Intermediate	3.09
37	1.29	same	same	CORRECT	16	93	-1	0	contour167	Speech	0
38	0.965	diff	diff	CORRECT	16	93	-1	5.73	contour017	Intermediate	5.73
39	2.184	diff	diff	CORRECT	16	93	-1	-8.6	contour157	Speech	8.6
40	11.195	same	diff	INCORRECT	16	93	-1	-5.7	contour186	Speech	5.7
41	1.371	same	same	CORRECT	16	93	-1	0	contour048	Intermediate	0
42	1.094	same	same	CORRECT	16	93	-1	0	contour163	Speech	0
43	1.322	diff	diff	CORRECT	16	93	-1	14.9	contour059	Intermediate	14.9
44	0.663	diff	diff	CORRECT	16	93	-1	12.76	contour091	Speech	12.76
45	8.552	same	same	CORRECT	16	93	-1	0	contour010	Song	0
46	1.719	same	same	CORRECT	16	93	-1	0	contour160	Intermediate	0
47	1.132	diff	diff	CORRECT	16	93	-1	5.31	contour083	Speech	5.31
48	1.987	same	diff	INCORRECT	16	93	-1	2.21	contour130	Intermediate	2.21
49	1.154	diff	diff	CORRECT	16	93	-1	5.76	contour099	Speech	5.76
50	3.338	diff	same	INCORRECT	16	93	-1	0	contour197	Intermediate	0
51	1.615	same	same	CORRECT	16	93	-1	0	contour111	Song	0
52	1.314	same	same	CORRECT	16	93	-1	0	contour161	Song	0
53	0.951	diff	diff	CORRECT	16	93	-1	9.37	contour018	Song	9.37
54	0.945	same	same	CORRECT	16	93	-1	0	contour022	Intermediate	0
55	0.848	same	same	CORRECT	16	93	-1	0	contour035	Song	0
56	1.611	same	same	CORRECT	16	93	-1	0	contour123	Song	0
57	0.716	diff	diff	CORRECT	16	93	-1	-3.35	contour168	Song	3.35
58	1.186	same	same	CORRECT	16	93	-1	0	contour126	Intermediate	0
59	1.3	diff	diff	CORRECT	16	93	-1	2.3	contour069	Song	2.3
60	1.12	diff	diff	CORRECT	16	93	-1	6.6	contour118	Speech	6.6
61	0.834	same	same	CORRECT	16	93	-1	0	contour017	Speech	0
62	1.174	same	diff	INCORRECT	16	93	-1	-5.6	contour057	Speech	5.6
63	1.157	diff	diff	CORRECT	16	93	-1	14.79	contour090	Song	14.79
64	1.339	same	same	CORRECT	16	93	-1	0	contour086	Speech	0
65	0.973	diff	diff	CORRECT	16	93	-1	19.02	contour103	Song	19.02
66	1.461	same	same	CORRECT	16	93	-1	0	contour153	Song	0
67	0.881	diff	diff	CORRECT	16	93	-1	-3.22	contour137	Intermediate	3.22
68	1.247	same	same	CORRECT	16	93	-1	0	contour052	Song	0
69	0.96	same	same	CORRECT	16	93	-1	0	contour135	Intermediate	0
70	2.781	same	same	CORRECT	16	93	-1	0	contour155	Song	0
71	0.951	diff	diff	CORRECT	16	93	-1	17.88	contour146	Intermediate	17.88
72	0.944	diff	diff	CORRECT	16	93	-1	-9.62	contour060	Song	9.62
73	1.074	diff	diff	CORRECT	16	93	-1	-8.78	contour167	Song	8.78
74	0.95	same	same	CORRECT	16	93	-1	0	contour110	Intermediate	0
75	1.217	same	diff	INCORRECT	16	93	-1	-2.39	contour095	Speech	2.39
76	1.38	same	same	CORRECT	16	93	-1	0	contour071	Intermediate	0
77	0.954	diff	diff	CORRECT	16	93	-1	2.75	contour114	Intermediate	2.75
78	1.128	same	same	CORRECT	16	93	-1	0	contour157	Intermediate	0
79	0.964	diff	diff	CORRECT	16	93	-1	-9.15	contour034	Speech	9.15
80	0.958	diff	diff	CORRECT	16	93	-1	-3.74	contour168	Speech	3.74
81	0.837	same	same	CORRECT	16	93	-1	0	contour163	Intermediate	0
82	0.765	diff	diff	CORRECT	16	93	-1	-2.93	contour099	Song	2.93
83	1.271	same	same	CORRECT	16	93	-1	0	contour167	Intermediate	0
84	0.947	same	same	CORRECT	16	93	-1	0	contour130	Song	0
85	0.878	diff	diff	CORRECT	16	93	-1	-6.86	contour060	Speech	6.86
86	1.046	diff	diff	CORRECT	16	93	-1	-2.98	contour035	Intermediate	2.98
87	1.56	diff	diff	CORRECT	16	93	-1	-12.23	contour052	Speech	12.23
88	1.53	same	same	CORRECT	16	93	-1	0	contour135	Song	0
89	1.288	diff	diff	CORRECT	16	93	-1	5.29	contour010	Speech	5.29
90	1.024	diff	diff	CORRECT	16	93	-1	-5.85	contour017	Song	5.85
91	0.999	same	same	CORRECT	16	93	-1	0	contour114	Speech	0
92	0.852	diff	diff	CORRECT	16	93	-1	-6.94	contour069	Speech	6.94
93	1.4	same	same	CORRECT	16	93	-1	0	contour071	Song	0
94	1.055	diff	diff	CORRECT	16	93	-1	0	contour118	Song	0
95	0.932	diff	diff	CORRECT	16	93	-1	-14.4	contour091	Intermediate	14.4
96	1.068	same	diff	INCORRECT	16	93	-1	-1.73	contour155	Speech	1.73
97	0.995	same	same	CORRECT	16	93	-1	0	contour157	Song	0
98	0.924	same	same	CORRECT	16	93	-1	0	contour095	Song	0
99	0.89	same	same	CORRECT	16	93	-1	0	contour103	Speech	0
100	1.137	same	same	CORRECT	16	93	-1	0	contour160	Speech	0
101	1.048	same	same	CORRECT	16	93	-1	0	contour022	Speech	0
102	1.107	same	same	CORRECT	16	93	-1	0	contour111	Speech	0
103	0.866	diff	diff	CORRECT	16	93	-1	-4.85	contour110	Speech	4.85
104	1.044	same	same	CORRECT	16	93	-1	0	contour048	Song	0
105	1.267	same	same	CORRECT	16	93	-1	0	contour123	Speech	0
106	1.088	same	same	CORRECT	16	93	-1	0	contour137	Speech	0
107	0.873	same	same	CORRECT	16	93	-1	0	contour161	Intermediate	0
108	0.964	diff	diff	CORRECT	16	93	-1	16.99	contour126	Song	16.99
109	2.289	same	same	CORRECT	16	93	-1	0	contour018	Intermediate	0
110	1.067	diff	diff	CORRECT	16	93	-1	-6.21	contour083	Intermediate	6.21
111	1.209	same	same	CORRECT	16	93	-1	0	contour086	Intermediate	0
112	0.972	diff	diff	CORRECT	16	93	-1	8.64	contour059	Speech	8.64
113	1.281	diff	diff	CORRECT	16	93	-1	-7.67	contour153	Speech	7.67
114	0.982	diff	diff	CORRECT	16	93	-1	-5.61	contour057	Intermediate	5.61
115	1.549	same	same	CORRECT	16	93	-1	0	contour197	Speech	0
116	1.094	same	diff	INCORRECT	16	93	-1	0	contour186	Intermediate	0
117	0.844	diff	diff	CORRECT	16	93	-1	-13.95	contour090	Intermediate	13.95
118	1.074	same	same	CORRECT	16	93	-1	0	contour034	Song	0
119	0.777	diff	diff	CORRECT	16	93	-1	11.31	contour146	Speech	11.31
0	1.221	same	same	CORRECT	17	84	0	0	contour035	Intermediate	0
1	1.937	same	same	CORRECT	17	84	0	0	contour194	Song	0
2	2.011	same	diff	INCORRECT	17	84	0	-3.37	contour114	Speech	3.37
3	1.026	same	same	CORRECT	17	84	0	0	contour109	Speech	0
4	1.375	same	diff	INCORRECT	17	84	0	0	contour186	Intermediate	0
5	0.738	same	same	CORRECT	17	84	0	0	contour161	Song	0
6	3.365	same	diff	INCORRECT	17	84	0	2.93	contour165	Song	2.93
7	0.942	same	same	CORRECT	17	84	0	0	contour016	Intermediate	0
8	1.333	diff	diff	CORRECT	17	84	0	18.46	contour047	Speech	18.46
9	1.152	same	same	CORRECT	17	84	0	0	contour106	Speech	0
10	1.206	same	same	CORRECT	17	84	0	0	contour046	Song	0
11	1.184	same	diff	INCORRECT	17	84	0	-5.33	contour128	Speech	5.33
12	0.927	same	same	CORRECT	17	84	0	0	contour147	Song	0
13	0.941	same	same	CORRECT	17	84	0	0	contour197	Intermediate	0
14	4.021	same	same	CORRECT	17	84	0	0	contour182	Intermediate	0
15	1.168	diff	diff	CORRECT	17	84	0	-8.7	contour082	Intermediate	8.7
16	2.063	same	diff	INCORRECT	17	84	0	5.85	contour110	Song	5.85
17	3.347	same	same	CORRECT	17	84	0	0	contour163	Speech	0
18	0.71	diff	diff	CORRECT	17	84	0	2.77	contour003	Intermediate	2.77
19	1.083	same	diff	INCORRECT	17	84	0	-6.86	contour060	Speech	6.86
20	0.862	diff	diff	CORRECT	17	84	0	5.78	contour171	Speech	5.78
21	7.351	diff	same	INCORRECT	17	84	0	0	contour160	Intermediate	0
22	1.713	same	diff	INCORRECT	17	84	0	-10.41	contour152	Song	10.41
23	1.372	diff	diff	CORRECT	17	84	0	11.31	contour146	Speech	11.31
24	1.006	diff	diff	CORRECT	17	84	0	10.01	contour189	Song	10.01
25	0.903	diff	diff	CORRECT	17	84	0	12.78	contour091	Speech	12.78
26	1.82	same	diff	INCORRECT	17	84	0	0.04	contour085	Intermediate	0.04
27	3.234	same	same	CORRECT	17	84	0	0	contour119	Speech	0
28	0.901	same	same	CORRECT	17	84	0	0	contour008	Song	0
29	1.872	diff	diff	CORRECT	17	84	0	17.54	contour048	Song	17.54
30	0.636	same	same	CORRECT	17	84	0	0	contour200	Intermediate	0
31	0.914	same	same	CORRECT	17	84	0	0	contour039	Speech	0
32	0.949	diff	diff	CORRECT	17	84	0	-3.96	contour025	Speech	3.96
33	1.097	same	same	CORRECT	17	84	0	0	contour093	Speech	0
34	0.928	diff	diff	CORRECT	17	84	0	16.56	contour034	Intermediate	16.56
35	0.792	diff	diff	CORRECT	17	84	0	12.44	contour155	Song	12.44
36	1.23	diff	diff	CORRECT	17	84	0	8.55	contour010	Intermediate	8.55
37	1.064	same	same	CORRECT	17	84	0	0	contour150	Song	0
38	1.037	same	same	CORRECT	17	84	0	0	contour137	Intermediate	0
39	2.041	diff	same	INCORRECT	17	84	0	0	contour037	Intermediate	0
40	0.999	same	same	CORRECT	17	84	0	0	contour119	Song	0
41	1.677	same	diff	INCORRECT	17	84	0	-2.36	contour003	Song	2.36
42	1.107	same	same	CORRECT	17	84	0	0	contour200	Speech	0
43	4.816	diff	diff	CORRECT	17	84	0	16.31	contour060	Intermediate	16.31
44	0.935	same	same	CORRECT	17	84	0	0	contour109	Song	0
45	1.889	same	same	CORRECT	17	84	0	0	contour039	Song	0
46	1.858	diff	diff	CORRECT	17	84	0	9.59	contour152	Intermediate	9.59
47	1.097	same	diff	INCORRECT	17	84	0	0	contour025	Intermediate	0
48	0.885	same	same	CORRECT	17	84	0	0	contour008	Intermediate	0
49	0.958	diff	diff	CORRECT	17	84	0	5.74	contour037	Speech	5.74
50	6.121	diff	diff	CORRECT	17	84	0	8.58	contour048	Intermediate	8.58
51	0.863	same	same	CORRECT	17	84	0	0	contour093	Intermediate	0
52	1.758	same	diff	INCORRECT	17	84	0	-6.88	contour016	Speech	6.88
53	2.379	diff	diff	CORRECT	17	84	0	8.39	contour194	Speech	8.39
54	4.265	diff	diff	CORRECT	17	84	0	12	contour147	Intermediate	12
55	3.32	same	diff	INCORRECT	17	84	0	-9.04	contour165	Intermediate	9.04
56	1.942	same	same	CORRECT	17	84	0	0	contour114	Intermediate	0
57	0.916	same	same	CORRECT	17	84	0	0	contour155	Speech	0
58	2.567	same	diff	INCORRECT	17	84	0	-8.61	contour035	Speech	8.61
59	0.871	diff	diff	CORRECT	17	84	0	13.33	contour082	Speech	13.33
60	0.916	same	same	CORRECT	17	84	0	0	contour010	Speech	0
61	1.032	same	same	CORRECT	17	84	0	0	contour137	Speech	0
62	1.77	same	same	CORRECT	17	84	0	0	contour128	Intermediate	0
63	1.382	same	diff	INCORRECT	17	84	0	9.37	contour034	Song	9.37
64	0.876	same	same	CORRECT	17	84	0	0	contour110	Speech	0
65	1.126	same	same	CORRECT	17	84	0	0	contour161	Speech	0
66	0.827	same	same	CORRECT	17	84	0	0	contour047	Song	0
67	2.478	diff	diff	CORRECT	17	84	0	-8.52	contour106	Intermediate	8.52
68	1.056	same	diff	INCORRECT	17	84	0	-2.93	contour197	Song	2.93
69	1.093	same	same	CORRECT	17	84	0	0	contour146	Intermediate	0
70	2.776	same	same	CORRECT	17	84	0	0	contour150	Speech	0
71	3.987	same	same	CORRECT	17	84	0	0	contour091	Song	0
72	1.293	same	same	CORRECT	17	84	0	0	contour189	Speech	0
73	0.841	same	diff	INCORRECT	17	84	0	3	contour046	Intermediate	3
74	2.1	same	same	CORRECT	17	84	0	0	contour182	Song	0
75	1.085	same	diff	INCORRECT	17	84	0	5.15	contour085	Speech	5.15
76	0.853	same	same	CORRECT	17	84	0	0	contour160	Song	0
77	0.828	same	diff	INCORRECT	17	84	0	-5.72	contour186	Speech	5.72
78	1.57	same	diff	INCORRECT	17	84	0	-8.6	contour171	Intermediate	8.6
79	1.485	diff	diff	CORRECT	17	84	0	3	contour163	Intermediate	3
80	0.914	same	same	CORRECT	17	84	0	0	contour200	Song	0
81	0.951	diff	diff	CORRECT	17	84	0	-8.83	contour048	Speech	8.83
82	0.676	diff	diff	CORRECT	17	84	0	-10.24	contour016	Song	10.24
83	1.1	diff	diff	CORRECT	17	84	0	-14.41	contour091	Intermediate	14.41
84	0.941	same	same	CORRECT	17	84	0	0	contour037	Song	0
85	1.594	diff	diff	CORRECT	17	84	0	-3.36	contour197	Speech	3.36
86	1.199	same	same	CORRECT	17	84	0	0	contour034	Speech	0
87	0.821	diff	diff	CORRECT	17	84	0	5.85	contour106	Song	5.85
88	1.136	same	same	CORRECT	17	84	0	0	contour039	Intermediate	0
89	1.08	diff	diff	CORRECT	17	84	0	-7.93	contour160	Speech	7.93
90	0.812	same	same	CORRECT	17	84	0	0	contour171	Song	0
91	0.66	same	diff	INCORRECT	17	84	0	5.84	contour085	Song	5.84
92	0.878	same	diff	INCORRECT	17	84	0	6.29	contour025	Song	6.29
93	1.024	same	same	CORRECT	17	84	0	0	contour165	Speech	0
94	0.808	same	same	CORRECT	17	84	0	0	contour114	Song	0
95	1.044	same	same	CORRECT	17	84	0	0	contour046	Speech	0
96	0.592	diff	diff	CORRECT	17	84	0	12.19	contour119	Intermediate	12.19
97	0.527	diff	diff	CORRECT	17	84	0	14.18	contour182	Speech	14.18
98	6.392	same	same	CORRECT	17	84	0	0	contour152	Speech	0
99	1.302	same	diff	INCORRECT	17	84	0	-9.62	contour060	Song	9.62
100	1.047	same	same	CORRECT	17	84	0	0	contour194	Intermediate	0
101	0.811	same	same	CORRECT	17	84	0	0	contour003	Speech	0
102	0.856	same	same	CORRECT	17	84	0	0	contour150	Intermediate	0
103	1.158	same	diff	INCORRECT	17	84	0	0	contour186	Song	0
104	1.082	same	diff	INCORRECT	17	84	0	-7.88	contour093	Song	7.88
105	0.955	same	same	CORRECT	17	84	0	0	contour146	Song	0
106	0.908	same	same	CORRECT	17	84	0	0	contour189	Intermediate	0
107	0.788	same	same	CORRECT	17	84	0	0	contour082	Song	0
108	0.97	same	diff	INCORRECT	17	84	0	-2.93	contour137	Song	2.93
109	0.645	same	same	CORRECT	17	84	0	0	contour008	Speech	0
110	0.799	same	diff	INCORRECT	17	84	0	-15.61	contour109	Intermediate	15.61
111	0.826	same	diff	INCORRECT	17	84	0	-6.89	contour147	Speech	6.89
112	4.591	same	diff	INCORRECT	17	84	0	9.38	contour163	Song	9.38
113	2.476	diff	diff	CORRECT	17	84	0	-14.49	contour110	Intermediate	14.49
114	0.959	same	same	CORRECT	17	84	0	0	contour035	Song	0
115	0.916	diff	diff	CORRECT	17	84	0	6.29	contour010	Song	6.29
116	1.018	same	diff	INCORRECT	17	84	0	0	contour155	Intermediate	0
117	0.741	same	same	CORRECT	17	84	0	0	contour161	Intermediate	0
118	2.905	same	same	CORRECT	17	84	0	0	contour128	Song	0
119	1.506	same	same	CORRECT	17	84	0	0	contour047	Intermediate	0
0	1.259	diff	diff	CORRECT	18	54	-0.833333	-2.92	contour035	Song	2.92
1	1.363	same	same	CORRECT	18	54	-0.833333	0	contour083	Song	0
2	1.618	same	same	CORRECT	18	54	-0.833333	0	contour049	Song	0
3	3.902	same	diff	INCORRECT	18	54	-0.833333	0	contour064	Intermediate	0
4	1.642	same	same	CORRECT	18	54	-0.833333	0	contour082	Intermediate	0
5	1.136	diff	diff	CORRECT	18	54	-0.833333	-11.23	contour131	Song	11.23
6	1.631	same	same	CORRECT	18	54	-0.833333	0	contour025	Intermediate	0
7	1.519	same	same	CORRECT	18	54	-0.833333	0	contour200	Song	0
8	1.277	diff	diff	CORRECT	18	54	-0.833333	16.36	contour164	Song	16.36
9	3.783	diff	same	INCORRECT	18	54	-0.833333	0	contour104	Intermediate	0
10	2.417	same	same	CORRECT	18	54	-0.833333	0	contour113	Speech	0
11	2.469	same	same	CORRECT	18	54	-0.833333	0	contour106	Intermediate	0
12	1.672	diff	diff	CORRECT	18	54	-0.833333	-5.33	contour128	Speech	5.33
13	1.384	same	same	CORRECT	18	54	-0.833333	0	contour054	Song	0
14	1.021	diff	diff	CORRECT	18	54	-0.833333	-1.95	contour053	Speech	1.95
15	0.902	same	same	CORRECT	18	54	-0.833333	0	contour038	Song	0
16	1.346	same	diff	INCORRECT	18	54	-0.833333	-1.73	contour155	Speech	1.73
17	1.056	diff	diff	CORRECT	18	54	-0.833333	-8.96	contour117	Speech	8.96
18	1.229	same	same	CORRECT	18	54	-0.833333	0	contour167	Intermediate	0
19	2.195	same	same	CORRECT	18	54	-0.833333	0	contour146	Intermediate	0
20	1.671	same	same	CORRECT	18	54	-0.833333	0	contour085	Song	0
21	1.202	diff	diff	CORRECT	18	54	-0.833333	-6.42	contour032	Speech	6.42
22	4.799	same	same	CORRECT	18	54	-0.833333	0	contour036	Speech	0
23	2.292	same	diff	INCORRECT	18	54	-0.833333	-6.86	contour060	Speech	6.86
24	0.853	same	same	CORRECT	18	54	-0.833333	0	contour168	Song	0
25	2.412	same	diff	INCORRECT	18	54	-0.833333	-9.12	contour005	Song	9.12
26	0.993	same	diff	INCORRECT	18	54	-0.833333	3.17	contour123	Speech	3.17
27	2.253	diff	diff	CORRECT	18	54	-0.833333	2.41	contour075	Speech	2.41
28	1.51	diff	diff	CORRECT	18	54	-0.833333	-13.96	contour090	Intermediate	13.96
29	2.486	diff	diff	CORRECT	18	54	-0.833333	18.46	contour047	Speech	18.46
30	1.056	diff	diff	CORRECT	18	54	-0.833333	-5.3	contour174	Song	5.3
31	1.147	diff	same	INCORRECT	18	54	-0.833333	0	contour186	Speech	0
32	1.394	same	same	CORRECT	18	54	-0.833333	0	contour178	Song	0
33	3.273	diff	diff	CORRECT	18	54	-0.833333	16.56	contour034	Intermediate	16.56
34	1.145	diff	diff	CORRECT	18	54	-0.833333	-8.92	contour088	Speech	8.92
35	1.695	same	same	CORRECT	18	54	-0.833333	0	contour057	Speech	0
36	0.942	diff	diff	CORRECT	18	54	-0.833333	16.86	contour008	Intermediate	16.86
37	0.759	same	same	CORRECT	18	54	-0.833333	0	contour077	Intermediate	0
38	2.428	diff	diff	CORRECT	18	54	-0.833333	9.38	contour163	Song	9.38
39	1.074	diff	same	INCORRECT	18	54	-0.833333	0	contour022	Song	0
40	1.288	diff	diff	CORRECT	18	54	-0.833333	13.16	contour054	Intermediate	13.16
41	1.361	same	same	CORRECT	18	54	-0.833333	0	contour034	Song	0
42	0.907	same	same	CORRECT	18	54	-0.833333	0	contour168	Intermediate	0
43	0.548	same	same	CORRECT	18	54	-0.833333	0	contour049	Speech	0
44	1.515	same	same	CORRECT	18	54	-0.833333	0	contour032	Song	0
45	0.703	diff	diff	CORRECT	18	54	-0.833333	16.31	contour060	Intermediate	16.31
46	1.518	same	same	CORRECT	18	54	-0.833333	0	contour038	Intermediate	0
47	0.561	diff	diff	CORRECT	18	54	-0.833333	13.24	contour090	Speech	13.24
48	1.301	same	diff	INCORRECT	18	54	-0.833333	-8.11	contour128	Intermediate	8.11
49	1.195	same	diff	INCORRECT	18	54	-0.833333	5.85	contour104	Song	5.85
50	1.261	same	diff	INCORRECT	18	54	-0.833333	-5.61	contour057	Intermediate	5.61
51	0.726	same	same	CORRECT	18	54	-0.833333	0	contour186	Song	0
52	1.293	same	diff	INCORRECT	18	54	-0.833333	5.15	contour085	Speech	5.15
53	0.886	same	same	CORRECT	18	54	-0.833333	0	contour131	Intermediate	0
54	5.518	same	same	CORRECT	18	54	-0.833333	0	contour123	Song	0
55	0.757	diff	diff	CORRECT	18	54	-0.833333	14.53	contour008	Speech	14.53
56	0.91	same	same	CORRECT	18	54	-0.833333	0	contour174	Speech	0
57	0.93	diff	diff	CORRECT	18	54	-0.833333	5.85	contour106	Song	5.85
58	0.931	same	same	CORRECT	18	54	-0.833333	0	contour077	Song	0
59	0.601	diff	diff	CORRECT	18	54	-0.833333	-6.21	contour083	Intermediate	6.21
60	1.078	diff	diff	CORRECT	18	54	-0.833333	-8.78	contour167	Song	8.78
61	1.865	same	same	CORRECT	18	54	-0.833333	0	contour163	Intermediate	0
62	0.759	diff	diff	CORRECT	18	54	-0.833333	-10.22	contour022	Intermediate	10.22
63	1.242	same	same	CORRECT	18	54	-0.833333	0	contour113	Song	0
64	0.985	same	diff	INCORRECT	18	54	-0.833333	6.12	contour075	Intermediate	6.12
65	0.991	diff	diff	CORRECT	18	54	-0.833333	-9.6	contour053	Intermediate	9.6
66	1.476	same	same	CORRECT	18	54	-0.833333	0	contour155	Song	0
67	0.829	same	diff	INCORRECT	18	54	-0.833333	0	contour064	Song	0
68	0.971	same	same	CORRECT	18	54	-0.833333	0	contour164	Intermediate	0
69	3.484	diff	diff	CORRECT	18	54	-0.833333	-12.88	contour088	Intermediate	12.88
70	1.314	diff	diff	CORRECT	18	54	-0.833333	12.3	contour005	Speech	12.3
71	1.902	same	same	CORRECT	18	54	-0.833333	0	contour117	Song	0
72	1.323	same	same	CORRECT	18	54	-0.833333	0	contour200	Intermediate	0
73	0.995	same	diff	INCORRECT	18	54	-0.833333	-12.86	contour146	Song	12.86
74	1.854	same	diff	INCORRECT	18	54	-0.833333	-3.96	contour025	Speech	3.96
75	1.035	same	same	CORRECT	18	54	-0.833333	0	contour035	Speech	0
76	0.957	same	same	CORRECT	18	54	-0.833333	0	contour036	Song	0
77	0.944	diff	diff	CORRECT	18	54	-0.833333	13.49	contour178	Speech	13.49
78	0.872	same	same	CORRECT	18	54	-0.833333	0	contour082	Speech	0
79	1.121	same	same	CORRECT	18	54	-0.833333	0	contour047	Intermediate	0
80	0.771	same	same	CORRECT	18	54	-0.833333	0	contour106	Speech	0
81	0.379	same	same	CORRECT	18	54	-0.833333	0	contour082	Song	0
82	0.829	same	diff	INCORRECT	18	54	-0.833333	-9.15	contour034	Speech	9.15
83	2.46	same	diff	INCORRECT	18	54	-0.833333	-1.98	contour054	Speech	1.98
84	0.889	same	same	CORRECT	18	54	-0.833333	0	contour057	Song	0
85	1.036	same	same	CORRECT	18	54	-0.833333	0	contour035	Intermediate	0
86	0.945	diff	diff	CORRECT	18	54	-0.833333	-7.14	contour022	Speech	7.14
87	2.573	same	diff	INCORRECT	18	54	-0.833333	-8.55	contour077	Speech	8.55
88	1.889	same	diff	INCORRECT	18	54	-0.833333	-8.9	contour163	Speech	8.9
89	0.879	same	same	CORRECT	18	54	-0.833333	0	contour008	Song	0
90	1.924	diff	diff	CORRECT	18	54	-0.833333	14.62	contour117	Intermediate	14.62
91	0.914	same	diff	INCORRECT	18	54	-0.833333	5.34	contour131	Speech	5.34
92	0.969	diff	diff	CORRECT	18	54	-0.833333	5.31	contour083	Speech	5.31
93	1.142	same	diff	INCORRECT	18	54	-0.833333	2.19	contour038	Speech	2.19
94	1.552	diff	diff	CORRECT	18	54	-0.833333	14.63	contour088	Song	14.63
95	2.248	same	same	CORRECT	18	54	-0.833333	0	contour200	Speech	0
96	1.115	same	same	CORRECT	18	54	-0.833333	0	contour060	Song	0
97	0.96	diff	diff	CORRECT	18	54	-0.833333	0	contour128	Song	0
98	1.876	same	same	CORRECT	18	54	-0.833333	0	contour085	Intermediate	0
99	2.045	same	diff	INCORRECT	18	54	-0.833333	5.67	contour178	Intermediate	5.67
100	0.954	same	same	CORRECT	18	54	-0.833333	0	contour123	Intermediate	0
101	0.917	same	same	CORRECT	18	54	-0.833333	0	contour167	Speech	0
102	4.619	same	same	CORRECT	18	54	-0.833333	0	contour064	Speech	0
103	1.298	same	same	CORRECT	18	54	-0.833333	0	contour090	Song	0
104	1.032	same	same	CORRECT	18	54	-0.833333	0	contour049	Intermediate	0
105	1.054	same	same	CORRECT	18	54	-0.833333	0	contour113	Intermediate	0
106	0.969	diff	diff	CORRECT	18	54	-0.833333	-6.35	contour036	Intermediate	6.35
107	1.5	same	same	CORRECT	18	54	-0.833333	0	contour032	Intermediate	0
108	1.972	diff	diff	CORRECT	18	54	-0.833333	6.29	contour025	Song	6.29
109	0.729	diff	diff	CORRECT	18	54	-0.833333	19.03	contour053	Song	19.03
110	0.871	same	diff	INCORRECT	18	54	-0.833333	0	contour186	Intermediate	0
111	0.846	same	same	CORRECT	18	54	-0.833333	0	contour104	Speech	0
112	0.916	same	same	CORRECT	18	54	-0.833333	0	contour075	Song	0
113	1.015	same	same	CORRECT	18	54	-0.833333	0	contour155	Intermediate	0
114	0.973	same	same	CORRECT	18	54	-0.833333	0	contour174	Intermediate	0
115	0.873	diff	diff	CORRECT	18	54	-0.833333	19.02	contour047	Song	19.02
116	2.739	same	diff	INCORRECT	18	54	-0.833333	-6.45	contour164	Speech	6.45
117	0.882	diff	diff	CORRECT	18	54	-0.833333	11.35	contour146	Speech	11.35
118	0.982	same	diff	INCORRECT	18	54	-0.833333	-3.74	contour168	Speech	3.74
119	1.028	same	same	CORRECT	18	54	-0.833333	0	contour005	Intermediate	0
0	1.307	same	diff	INCORRECT	19	94	-1	8.57	contour010	Intermediate	8.57
1	0.633	same	same	CORRECT	19	94	-1	0	contour155	Song	0
2	0.548	same	same	CORRECT	19	94	-1	0	contour049	Song	0
3	1.358	same	diff	INCORRECT	19	94	-1	2.42	contour165	Speech	2.42
4	0.932	diff	same	INCORRECT	19	94	-1	0	contour113	Song	0
5	0.987	same	same	CORRECT	19	94	-1	0	contour038	Speech	0
6	1.554	same	diff	INCORRECT	19	94	-1	-6.09	contour086	Intermediate	6.09
7	1.053	same	diff	INCORRECT	19	94	-1	-9.62	contour060	Song	9.62
8	1.97	diff	diff	CORRECT	19	94	-1	8.48	contour068	Intermediate	8.48
9	2.506	diff	diff	CORRECT	19	94	-1	-10.22	contour022	Intermediate	10.22
10	1.087	same	same	CORRECT	19	94	-1	0	contour162	Song	0
11	3.048	same	same	CORRECT	19	94	-1	0	contour095	Intermediate	0
12	1.086	same	same	CORRECT	19	94	-1	0	contour053	Song	0
13	1.27	same	diff	INCORRECT	19	94	-1	-8.38	contour135	Speech	8.38
14	1.031	same	diff	INCORRECT	19	94	-1	-11.53	contour093	Speech	11.53
15	0.911	same	same	CORRECT	19	94	-1	0	contour197	Song	0
16	1.026	same	diff	INCORRECT	19	94	-1	-10.41	contour152	Song	10.41
17	1.027	same	diff	INCORRECT	19	94	-1	9.37	contour034	Song	9.37
18	2.104	diff	same	INCORRECT	19	94	-1	0	contour200	Speech	0
19	0.99	same	diff	INCORRECT	19	94	-1	-8.57	contour071	Intermediate	8.57
20	1.219	diff	same	INCORRECT	19	94	-1	0	contour126	Song	0
21	1.411	same	same	CORRECT	19	94	-1	0	contour118	Song	0
22	1.659	same	same	CORRECT	19	94	-1	0	contour186	Speech	0
23	0.818	same	same	CORRECT	19	94	-1	0	contour150	Intermediate	0
24	0.857	diff	diff	CORRECT	19	94	-1	-12.1	contour124	Intermediate	12.1
25	2.192	diff	same	INCORRECT	19	94	-1	0	contour032	Speech	0
26	0.674	diff	diff	CORRECT	19	94	-1	12.74	contour091	Speech	12.74
27	0.671	diff	diff	CORRECT	19	94	-1	-9.12	contour005	Song	9.12
28	0.928	same	same	CORRECT	19	94	-1	0	contour109	Song	0
29	1.149	same	diff	INCORRECT	19	94	-1	2.93	contour157	Song	2.93
30	0.81	same	diff	INCORRECT	19	94	-1	5.84	contour085	Song	5.84
31	1.051	same	same	CORRECT	19	94	-1	0	contour018	Song	0
32	1.927	same	same	CORRECT	19	94	-1	0	contour182	Speech	0
33	0.974	diff	diff	CORRECT	19	94	-1	-12.23	contour052	Speech	12.23
34	0.964	same	same	CORRECT	19	94	-1	0	contour039	Speech	0
35	1.172	diff	diff	CORRECT	19	94	-1	-8.61	contour035	Speech	8.61
36	0.827	same	same	CORRECT	19	94	-1	0	contour090	Speech	0
37	1.057	same	same	CORRECT	19	94	-1	0	contour194	Intermediate	0
38	1.66	diff	diff	CORRECT	19	94	-1	-3.51	contour027	Speech	3.51
39	3.448	same	diff	INCORRECT	19	94	-1	-12.88	contour088	Intermediate	12.88
40	2.515	same	diff	INCORRECT	19	94	-1	5.15	contour085	Speech	5.15
41	0.704	diff	diff	CORRECT	19	94	-1	-15.62	contour109	Intermediate	15.62
42	0.847	same	diff	INCORRECT	19	94	-1	-7.88	contour093	Song	7.88
43	0.995	diff	diff	CORRECT	19	94	-1	-2.98	contour035	Intermediate	2.98
44	0.424	diff	diff	CORRECT	19	94	-1	-14.41	contour091	Intermediate	14.41
45	3.273	diff	diff	CORRECT	19	94	-1	-7.88	contour071	Song	7.88
46	0.631	same	diff	INCORRECT	19	94	-1	0	contour186	Intermediate	0
47	0.998	diff	diff	CORRECT	19	94	-1	-3.03	contour197	Intermediate	3.03
48	0.705	same	same	CORRECT	19	94	-1	0	contour200	Song	0
49	0.914	same	same	CORRECT	19	94	-1	0	contour088	Song	0
50	1.347	diff	same	INCORRECT	19	94	-1	0	contour038	Song	0
51	1.038	diff	diff	CORRECT	19	94	-1	9.15	contour018	Speech	9.15
52	2.679	same	same	CORRECT	19	94	-1	0	contour162	Speech	0
53	0.926	same	same	CORRECT	19	94	-1	0	contour052	Song	0
54	1.617	diff	same	INCORRECT	19	94	-1	0	contour126	Speech	0
55	0.645	diff	diff	CORRECT	19	94	-1	9.38	contour150	Song	9.38
56	0.783	same	same	CORRECT	19	94	-1	0	contour049	Speech	0
57	0.767	same	same	CORRECT	19	94	-1	0	contour053	Intermediate	0
58	0.855	same	same	CORRECT	19	94	-1	0	contour005	Speech	0
59	0.975	diff	diff	CORRECT	19	94	-1	7.03	contour152	Speech	7.03
60	1.261	diff	diff	CORRECT	19	94	-1	14.79	contour090	Song	14.79
61	0.937	same	diff	INCORRECT	19	94	-1	5.29	contour010	Speech	5.29
62	0.722	same	same	CORRECT	19	94	-1	0	contour124	Speech	0
63	3.795	same	diff	INCORRECT	19	94	-1	-6.97	contour022	Speech	6.97
64	0.779	same	same	CORRECT	19	94	-1	0	contour095	Speech	0
65	0.921	same	diff	INCORRECT	19	94	-1	-2.92	contour039	Song	2.92
66	1.596	same	diff	INCORRECT	19	94	-1	-9.17	contour034	Speech	9.17
67	0.843	same	same	CORRECT	19	94	-1	0	contour118	Intermediate	0
68	0.674	same	diff	INCORRECT	19	94	-1	-1.73	contour155	Speech	1.73
69	3.677	diff	same	INCORRECT	19	94	-1	0	contour182	Song	0
70	0.782	same	same	CORRECT	19	94	-1	0	contour068	Song	0
71	1.322	same	diff	INCORRECT	19	94	-1	-2.92	contour027	Song	2.92
72	0.821	same	same	CORRECT	19	94	-1	0	contour086	Speech	0
73	1.095	diff	diff	CORRECT	19	94	-1	4.71	contour113	Speech	4.71
74	1.088	diff	same	INCORRECT	19	94	-1	0	contour060	Intermediate	0
75	1.497	same	same	CORRECT	19	94	-1	0	contour157	Speech	0
76	1.101	same	diff	INCORRECT	19	94	-1	-9.14	contour135	Song	9.14
77	0.881	same	same	CORRECT	19	94	-1	0	contour032	Song	0
78	1.711	diff	same	INCORRECT	19	94	-1	0	contour165	Song	0
[truncated: 1,721 more rows]

## Sheet: Study 2
Trial_index	Reaction_Time	Response_string	Correct_response	Correctness	subject	musicality	spectral_hearing	contour	variant	deviation	deviation_abs
116	3.83	diff	same	INCORRECT	1	NA	NA	contour164	Song	0	0
4	1.603	same	diff	INCORRECT	1	NA	NA	contour070	Intermediate	1.01	1.01
20	2.616	same	diff	INCORRECT	1	NA	NA	contour064	Song	-1.33	1.33
0	1.388	same	diff	INCORRECT	1	NA	NA	contour185	Speech	-1.82	1.82
84	1.611	same	same	CORRECT	1	NA	NA	contour068	Speech	0	0
53	1.313	same	same	CORRECT	1	NA	NA	contour073	Song	0	0
16	1.094	same	same	CORRECT	1	NA	NA	contour178	Intermediate	0	0
101	1.025	same	diff	INCORRECT	1	NA	NA	contour107	Song	2.7	2.7
60	0.825	same	same	CORRECT	1	NA	NA	contour046	Speech	0	0
62	1.267	diff	diff	CORRECT	1	NA	NA	contour046	Song	-1.75	1.75
46	1.829	diff	same	INCORRECT	1	NA	NA	contour044	Intermediate	0	0
114	1.561	diff	diff	CORRECT	1	NA	NA	contour164	Speech	-2.08	2.08
10	1.199	same	same	CORRECT	1	NA	NA	contour012	Intermediate	0	0
100	2.876	same	same	CORRECT	1	NA	NA	contour107	Intermediate	0	0
14	1.048	same	diff	INCORRECT	1	NA	NA	contour003	Song	-1.6	1.6
6	1.031	diff	diff	CORRECT	1	NA	NA	contour075	Speech	2.67	2.67
117	1.144	same	diff	INCORRECT	1	NA	NA	contour146	Speech	2.27	2.27
74	1.022	same	diff	INCORRECT	1	NA	NA	contour109	Song	2.71	2.71
11	1.139	diff	diff	CORRECT	1	NA	NA	contour012	Song	-1.34	1.34
63	0.677	diff	same	INCORRECT	1	NA	NA	contour027	Speech	0	0
67	0.957	same	diff	INCORRECT	1	NA	NA	contour106	Intermediate	1.95	1.95
30	0.868	same	same	CORRECT	1	NA	NA	contour036	Speech	0	0
44	0.805	diff	same	INCORRECT	1	NA	NA	contour009	Song	0	0
113	1.001	diff	diff	CORRECT	1	NA	NA	contour136	Song	-1.35	1.35
8	1.122	diff	diff	CORRECT	1	NA	NA	contour075	Song	-4.96	4.96
119	1.289	same	diff	INCORRECT	1	NA	NA	contour146	Song	-1.47	1.47
81	2.811	diff	diff	CORRECT	1	NA	NA	contour057	Speech	-2.74	2.74
111	1.439	diff	same	INCORRECT	1	NA	NA	contour136	Speech	0	0
36	1.518	diff	same	INCORRECT	1	NA	NA	contour037	Speech	0	0
76	1.442	same	diff	INCORRECT	1	NA	NA	contour139	Intermediate	0	0
103	1.445	diff	diff	CORRECT	1	NA	NA	contour130	Intermediate	1.39	1.39
18	0.78	same	same	CORRECT	1	NA	NA	contour064	Speech	0	0
17	1.005	same	diff	INCORRECT	1	NA	NA	contour178	Song	-1.61	1.61
70	1.161	diff	diff	CORRECT	1	NA	NA	contour174	Intermediate	1.41	1.41
65	0.96	diff	diff	CORRECT	1	NA	NA	contour027	Song	2.92	2.92
75	1.326	diff	same	INCORRECT	1	NA	NA	contour139	Speech	0	0
26	1.055	same	diff	INCORRECT	1	NA	NA	contour171	Song	-1.6	1.6
66	0.996	diff	same	INCORRECT	1	NA	NA	contour106	Speech	0	0
92	0.877	diff	diff	CORRECT	1	NA	NA	contour163	Song	1.59	1.59
28	1.229	same	diff	INCORRECT	1	NA	NA	contour148	Intermediate	2.29	2.29
82	0.973	same	same	CORRECT	2	NA	-0.5	contour057	Intermediate	0	0
42	0.946	same	diff	INCORRECT	2	NA	-0.5	contour009	Speech	-3.32	3.32
57	1.522	same	same	CORRECT	2	NA	-0.5	contour072	Speech	0	0
104	0.831	same	same	CORRECT	2	NA	-0.5	contour130	Song	0	0
0	1.178	same	diff	INCORRECT	2	NA	-0.5	contour185	Speech	-1.82	1.82
113	2.677	same	diff	INCORRECT	2	NA	-0.5	contour136	Song	-1.35	1.35
101	0.879	same	diff	INCORRECT	2	NA	-0.5	contour107	Song	2.7	2.7
90	0.958	same	same	CORRECT	2	NA	-0.5	contour163	Speech	0	0
11	1.104	same	diff	INCORRECT	2	NA	-0.5	contour012	Song	-1.34	1.34
91	0.749	same	same	CORRECT	2	NA	-0.5	contour163	Intermediate	0	0
32	4.45	diff	same	INCORRECT	2	NA	-0.5	contour036	Song	0	0
39	0.629	same	same	CORRECT	2	NA	-0.5	contour071	Speech	0	0
75	1.134	same	same	CORRECT	2	NA	-0.5	contour139	Speech	0	0
5	0.963	same	same	CORRECT	2	NA	-0.5	contour070	Song	0	0
44	1.075	diff	same	INCORRECT	2	NA	-0.5	contour009	Song	0	0
73	0.818	same	diff	INCORRECT	2	NA	-0.5	contour109	Intermediate	-1.65	1.65
65	1.213	diff	diff	CORRECT	2	NA	-0.5	contour027	Song	2.92	2.92
28	0.843	same	diff	INCORRECT	2	NA	-0.5	contour148	Intermediate	2.29	2.29
119	1.045	same	diff	INCORRECT	2	NA	-0.5	contour146	Song	-1.47	1.47
1	1.159	same	same	CORRECT	2	NA	-0.5	contour185	Intermediate	0	0
8	0.914	diff	diff	CORRECT	2	NA	-0.5	contour075	Song	-4.96	4.96
41	0.949	same	same	CORRECT	2	NA	-0.5	contour071	Song	0	0
47	1.844	same	same	CORRECT	2	NA	-0.5	contour044	Song	0	0
84	0.682	same	same	CORRECT	2	NA	-0.5	contour068	Speech	0	0
70	0.753	same	diff	INCORRECT	2	NA	-0.5	contour174	Intermediate	1.41	1.41
76	1.791	diff	diff	CORRECT	2	NA	-0.5	contour139	Intermediate	0	0
16	0.676	same	same	CORRECT	2	NA	-0.5	contour178	Intermediate	0	0
2	1.191	same	same	CORRECT	2	NA	-0.5	contour185	Song	0	0
52	0.573	same	same	CORRECT	2	NA	-0.5	contour073	Intermediate	0	0
58	1.212	same	same	CORRECT	2	NA	-0.5	contour072	Intermediate	0	0
81	1.074	diff	diff	CORRECT	2	NA	-0.5	contour057	Speech	-2.74	2.74
23	0.912	same	diff	INCORRECT	2	NA	-0.5	contour179	Song	3.16	3.16
46	0.95	same	same	CORRECT	2	NA	-0.5	contour044	Intermediate	0	0
4	1.303	same	diff	INCORRECT	2	NA	-0.5	contour070	Intermediate	1.01	1.01
19	0.641	same	same	CORRECT	2	NA	-0.5	contour064	Intermediate	0	0
50	1.091	same	same	CORRECT	2	NA	-0.5	contour076	Song	0	0
37	1.221	diff	same	INCORRECT	2	NA	-0.5	contour037	Intermediate	0	0
95	0.887	same	diff	INCORRECT	2	NA	-0.5	contour047	Song	-1.46	1.46
93	0.993	same	same	CORRECT	2	NA	-0.5	contour047	Speech	0	0
64	1.02	same	diff	INCORRECT	2	NA	-0.5	contour027	Intermediate	-2.84	2.84
80	0.7	diff	diff	CORRECT	2	NA	-0.5	contour151	Song	2.92	2.92
78	0.911	same	diff	INCORRECT	2	NA	-0.5	contour151	Speech	-2.29	2.29
68	0.933	same	same	CORRECT	2	NA	-0.5	contour106	Song	0	0
67	0.563	same	diff	INCORRECT	2	NA	-0.5	contour106	Intermediate	1.95	1.95
14	1.015	same	diff	INCORRECT	2	NA	-0.5	contour003	Song	-1.6	1.6
102	1.465	same	diff	INCORRECT	2	NA	-0.5	contour130	Speech	-1.97	1.97
87	0.849	same	same	CORRECT	2	NA	-0.5	contour135	Speech	0	0
105	1.162	same	diff	INCORRECT	2	NA	-0.5	contour017	Speech	2.36	2.36
38	0.919	same	same	CORRECT	2	NA	-0.5	contour037	Song	0	0
69	0.895	diff	diff	CORRECT	2	NA	-0.5	contour174	Speech	-2.18	2.18
79	0.919	same	same	CORRECT	2	NA	-0.5	contour151	Intermediate	0	0
106	0.755	diff	diff	CORRECT	2	NA	-0.5	contour017	Intermediate	-3.27	3.27
45	0.932	same	diff	INCORRECT	2	NA	-0.5	contour044	Speech	0	0
62	0.72	same	diff	INCORRECT	2	NA	-0.5	contour046	Song	-1.75	1.75
112	1.052	same	diff	INCORRECT	2	NA	-0.5	contour136	Intermediate	-3.21	3.21
92	0.679	same	diff	INCORRECT	2	NA	-0.5	contour163	Song	1.59	1.59
35	0.447	same	diff	INCORRECT	2	NA	-0.5	contour103	Song	8.4	8.4
33	0.45	same	same	CORRECT	2	NA	-0.5	contour103	Speech	0	0
40	0.763	same	diff	INCORRECT	2	NA	-0.5	contour071	Intermediate	2.2	2.2
55	0.873	same	same	CORRECT	2	NA	-0.5	contour059	Intermediate	0	0
94	0.778	same	diff	INCORRECT	2	NA	-0.5	contour047	Intermediate	2.82	2.82
26	0.873	same	diff	INCORRECT	2	NA	-0.5	contour171	Song	-1.6	1.6
29	0.679	diff	diff	CORRECT	2	NA	-0.5	contour148	Song	1.35	1.35
96	0.873	same	diff	INCORRECT	2	NA	-0.5	contour083	Speech	-2.16	2.16
27	0.688	same	same	CORRECT	2	NA	-0.5	contour148	Speech	0	0
98	1.055	diff	diff	CORRECT	2	NA	-0.5	contour083	Song	2.92	2.92
71	0.865	same	diff	INCORRECT	2	NA	-0.5	contour174	Song	-1.58	1.58
9	2.322	diff	same	INCORRECT	2	NA	-0.5	contour012	Speech	0	0
48	1.063	diff	same	INCORRECT	2	NA	-0.5	contour076	Speech	0	0
115	0.872	same	diff	INCORRECT	2	NA	-0.5	contour164	Intermediate	1.43	1.43
72	0.673	same	same	CORRECT	2	NA	-0.5	contour109	Speech	0	0
12	0.958	same	diff	INCORRECT	2	NA	-0.5	contour003	Speech	-2.75	2.75
97	0.701	same	same	CORRECT	2	NA	-0.5	contour083	Intermediate	0	0
43	0.708	diff	diff	CORRECT	2	NA	-0.5	contour009	Intermediate	-2.34	2.34
86	0.871	same	diff	INCORRECT	2	NA	-0.5	contour068	Song	2.92	2.92
20	1.317	same	diff	INCORRECT	2	NA	-0.5	contour064	Song	-1.33	1.33
99	0.586	same	same	CORRECT	2	NA	-0.5	contour107	Speech	0	0
110	0.879	same	diff	INCORRECT	2	NA	-0.5	contour156	Song	-1.46	1.46
88	0.564	same	diff	INCORRECT	2	NA	-0.5	contour135	Intermediate	-2.57	2.57
111	0.794	same	same	CORRECT	2	NA	-0.5	contour136	Speech	0	0
60	0.815	same	same	CORRECT	2	NA	-0.5	contour046	Speech	0	0
54	1.264	same	diff	INCORRECT	2	NA	-0.5	contour059	Speech	-1.76	1.76
109	1.069	same	diff	INCORRECT	2	NA	-0.5	contour156	Intermediate	0	0
51	0.566	same	same	CORRECT	2	NA	-0.5	contour073	Speech	0	0
31	1.137	same	diff	INCORRECT	2	NA	-0.5	contour036	Intermediate	0	0
100	0.55	same	same	CORRECT	2	NA	-0.5	contour107	Intermediate	0	0
83	0.918	same	same	CORRECT	2	NA	-0.5	contour057	Song	0	0
10	0.744	same	same	CORRECT	2	NA	-0.5	contour012	Intermediate	0	0
22	0.642	same	diff	INCORRECT	2	NA	-0.5	contour179	Intermediate	-2.56	2.56
7	0.942	same	diff	INCORRECT	2	NA	-0.5	contour075	Intermediate	-5.39	5.39
108	0.643	same	same	CORRECT	2	NA	-0.5	contour156	Speech	0	0
61	0.678	same	diff	INCORRECT	2	NA	-0.5	contour046	Intermediate	-2.59	2.59
25	0.606	same	same	CORRECT	2	NA	-0.5	contour171	Intermediate	0	0
17	1.273	same	diff	INCORRECT	2	NA	-0.5	contour178	Song	-1.61	1.61
85	0.859	same	same	CORRECT	2	NA	-0.5	contour068	Intermediate	0	0
118	0.714	same	diff	INCORRECT	2	NA	-0.5	contour146	Intermediate	-2.82	2.82
15	0.903	same	same	CORRECT	2	NA	-0.5	contour178	Speech	0	0
116	0.799	same	same	CORRECT	2	NA	-0.5	contour164	Song	0	0
3	0.85	same	same	CORRECT	2	NA	-0.5	contour070	Speech	0	0
24	0.792	same	same	CORRECT	2	NA	-0.5	contour171	Speech	0	0
103	0.528	same	diff	INCORRECT	2	NA	-0.5	contour130	Intermediate	1.39	1.39
13	0.839	same	same	CORRECT	2	NA	-0.5	contour003	Intermediate	0	0
36	0.643	same	same	CORRECT	2	NA	-0.5	contour037	Speech	0	0
30	0.43	same	same	CORRECT	2	NA	-0.5	contour036	Speech	0	0
59	1.431	same	same	CORRECT	2	NA	-0.5	contour072	Song	0	0
114	0.967	same	diff	INCORRECT	2	NA	-0.5	contour164	Speech	-2.08	2.08
53	0.575	same	same	CORRECT	2	NA	-0.5	contour073	Song	0	0
21	0.544	diff	diff	CORRECT	2	NA	-0.5	contour179	Speech	-3.71	3.71
63	0.711	same	same	CORRECT	2	NA	-0.5	contour027	Speech	0	0
6	1.247	diff	diff	CORRECT	2	NA	-0.5	contour075	Speech	2.67	2.67
117	0.889	same	diff	INCORRECT	2	NA	-0.5	contour146	Speech	2.27	2.27
34	0.787	same	same	CORRECT	2	NA	-0.5	contour103	Intermediate	0	0
107	0.579	same	diff	INCORRECT	2	NA	-0.5	contour017	Song	3.16	3.16
74	0.669	same	diff	INCORRECT	2	NA	-0.5	contour109	Song	2.71	2.71
89	0.588	same	same	CORRECT	2	NA	-0.5	contour135	Song	0	0
49	0.565	same	same	CORRECT	2	NA	-0.5	contour076	Intermediate	0	0
77	0.969	same	diff	INCORRECT	2	NA	-0.5	contour139	Song	-1.34	1.34
18	0.905	same	same	CORRECT	2	NA	-0.5	contour064	Speech	0	0
66	0.837	same	same	CORRECT	2	NA	-0.5	contour106	Speech	0	0
56	0.876	same	same	CORRECT	2	NA	-0.5	contour059	Song	0	0
11	1.1	same	diff	INCORRECT	3	NA	NA	contour012	Song	-1.34	1.34
107	1.914	same	diff	INCORRECT	3	NA	NA	contour017	Song	3.16	3.16
20	1.028	diff	diff	CORRECT	3	NA	NA	contour064	Song	-1.33	1.33
34	1.413	same	same	CORRECT	3	NA	NA	contour103	Intermediate	0	0
108	1.198	same	same	CORRECT	3	NA	NA	contour156	Speech	0	0
66	1.549	diff	same	INCORRECT	3	NA	NA	contour106	Speech	0	0
73	1.481	same	diff	INCORRECT	3	NA	NA	contour109	Intermediate	-1.65	1.65
59	2.603	same	same	CORRECT	3	NA	NA	contour072	Song	0	0
54	1.088	same	diff	INCORRECT	3	NA	NA	contour059	Speech	-1.76	1.76
15	1.972	same	same	CORRECT	3	NA	NA	contour178	Speech	0	0
63	1.895	same	same	CORRECT	3	NA	NA	contour027	Speech	0	0
90	2.986	same	same	CORRECT	3	NA	NA	contour163	Speech	0	0
75	1.072	same	same	CORRECT	3	NA	NA	contour139	Speech	0	0
94	2.046	diff	diff	CORRECT	3	NA	NA	contour047	Intermediate	2.82	2.82
17	1.258	diff	diff	CORRECT	3	NA	NA	contour178	Song	-1.61	1.61
12	1.851	same	diff	INCORRECT	3	NA	NA	contour003	Speech	-2.75	2.75
33	2.419	same	same	CORRECT	3	NA	NA	contour103	Speech	0	0
70	1.383	diff	diff	CORRECT	3	NA	NA	contour174	Intermediate	1.41	1.41
116	1.879	same	same	CORRECT	3	NA	NA	contour164	Song	0	0
9	2.005	same	same	CORRECT	3	NA	NA	contour012	Speech	0	0
0	4.317	same	diff	INCORRECT	3	NA	NA	contour185	Speech	-1.82	1.82
78	1.277	diff	diff	CORRECT	3	NA	NA	contour151	Speech	-2.29	2.29
36	1.435	same	same	CORRECT	3	NA	NA	contour037	Speech	0	0
58	0.883	same	same	CORRECT	3	NA	NA	contour072	Intermediate	0	0
41	1.947	same	same	CORRECT	3	NA	NA	contour071	Song	0	0
80	1.614	diff	diff	CORRECT	3	NA	NA	contour151	Song	2.92	2.92
46	1.565	same	same	CORRECT	3	NA	NA	contour044	Intermediate	0	0
25	1.211	same	same	CORRECT	3	NA	NA	contour171	Intermediate	0	0
76	1.372	diff	diff	CORRECT	3	NA	NA	contour139	Intermediate	0	0
29	1.084	diff	diff	CORRECT	3	NA	NA	contour148	Song	1.35	1.35
118	1.038	diff	diff	CORRECT	3	NA	NA	contour146	Intermediate	-2.82	2.82
113	1.33	diff	diff	CORRECT	3	NA	NA	contour136	Song	-1.35	1.35
55	2.933	same	same	CORRECT	3	NA	NA	contour059	Intermediate	0	0
22	1.926	diff	diff	CORRECT	3	NA	NA	contour179	Intermediate	-2.56	2.56
2	1.991	same	same	CORRECT	3	NA	NA	contour185	Song	0	0
93	1.169	same	same	CORRECT	3	NA	NA	contour047	Speech	0	0
35	1.454	diff	diff	CORRECT	3	NA	NA	contour103	Song	8.4	8.4
100	2.811	same	same	CORRECT	3	NA	NA	contour107	Intermediate	0	0
37	1.794	same	same	CORRECT	3	NA	NA	contour037	Intermediate	0	0
119	1.458	diff	diff	CORRECT	3	NA	NA	contour146	Song	-1.47	1.47
39	1.784	same	same	CORRECT	3	NA	NA	contour071	Speech	0	0
106	1.071	diff	diff	CORRECT	3	NA	NA	contour017	Intermediate	-3.27	3.27
112	1.719	diff	diff	CORRECT	3	NA	NA	contour136	Intermediate	-3.21	3.21
50	5.299	diff	same	INCORRECT	3	NA	NA	contour076	Song	0	0
65	1.293	diff	diff	CORRECT	3	NA	NA	contour027	Song	2.92	2.92
105	2.179	same	diff	INCORRECT	3	NA	NA	contour017	Speech	2.36	2.36
117	1.628	same	diff	INCORRECT	3	NA	NA	contour146	Speech	2.27	2.27
68	6.761	diff	same	INCORRECT	3	NA	NA	contour106	Song	0	0
5	1.816	diff	same	INCORRECT	3	NA	NA	contour070	Song	0	0
42	1.363	same	diff	INCORRECT	3	NA	NA	contour009	Speech	-3.32	3.32
14	1.484	diff	diff	CORRECT	3	NA	NA	contour003	Song	-1.6	1.6
115	4.406	diff	diff	CORRECT	3	NA	NA	contour164	Intermediate	1.43	1.43
62	1.682	same	diff	INCORRECT	3	NA	NA	contour046	Song	-1.75	1.75
95	0.997	diff	diff	CORRECT	3	NA	NA	contour047	Song	-1.46	1.46
4	1.24	same	diff	INCORRECT	3	NA	NA	contour070	Intermediate	1.01	1.01
16	1.487	same	same	CORRECT	3	NA	NA	contour178	Intermediate	0	0
79	1.786	same	same	CORRECT	3	NA	NA	contour151	Intermediate	0	0
7	1.944	diff	diff	CORRECT	3	NA	NA	contour075	Intermediate	-5.39	5.39
82	1.348	same	same	CORRECT	3	NA	NA	contour057	Intermediate	0	0
48	1.812	diff	same	INCORRECT	3	NA	NA	contour076	Speech	0	0
109	1.309	diff	diff	CORRECT	3	NA	NA	contour156	Intermediate	0	0
53	1.357	same	same	CORRECT	3	NA	NA	contour073	Song	0	0
44	2.773	diff	same	INCORRECT	3	NA	NA	contour009	Song	0	0
31	5.226	same	diff	INCORRECT	3	NA	NA	contour036	Intermediate	0	0
57	2.632	same	same	CORRECT	3	NA	NA	contour072	Speech	0	0
18	1.265	same	same	CORRECT	3	NA	NA	contour064	Speech	0	0
83	1.085	same	same	CORRECT	3	NA	NA	contour057	Song	0	0
52	1.362	same	same	CORRECT	3	NA	NA	contour073	Intermediate	0	0
26	1.026	same	diff	INCORRECT	3	NA	NA	contour171	Song	-1.6	1.6
99	1.136	same	same	CORRECT	3	NA	NA	contour107	Speech	0	0
21	1.439	same	diff	INCORRECT	3	NA	NA	contour179	Speech	-3.71	3.71
102	1.274	diff	diff	CORRECT	3	NA	NA	contour130	Speech	-1.97	1.97
96	1.56	same	diff	INCORRECT	3	NA	NA	contour083	Speech	-2.16	2.16
10	1.16	same	same	CORRECT	3	NA	NA	contour012	Intermediate	0	0
86	4.023	diff	diff	CORRECT	3	NA	NA	contour068	Song	2.92	2.92
6	9.088	diff	diff	CORRECT	3	NA	NA	contour075	Speech	2.67	2.67
110	1.446	same	diff	INCORRECT	3	NA	NA	contour156	Song	-1.46	1.46
40	1.1	same	diff	INCORRECT	3	NA	NA	contour071	Intermediate	2.2	2.2
72	2.042	same	same	CORRECT	3	NA	NA	contour109	Speech	0	0
101	1.447	same	diff	INCORRECT	3	NA	NA	contour107	Song	2.7	2.7
92	1.559	same	diff	INCORRECT	3	NA	NA	contour163	Song	1.59	1.59
87	1.675	same	same	CORRECT	3	NA	NA	contour135	Speech	0	0
8	0.997	diff	diff	CORRECT	3	NA	NA	contour075	Song	-4.96	4.96
67	6.321	same	diff	INCORRECT	3	NA	NA	contour106	Intermediate	1.95	1.95
30	1.947	same	same	CORRECT	3	NA	NA	contour036	Speech	0	0
85	1.032	same	same	CORRECT	3	NA	NA	contour068	Intermediate	0	0
43	2.132	same	diff	INCORRECT	3	NA	NA	contour009	Intermediate	-2.34	2.34
104	2.166	same	same	CORRECT	3	NA	NA	contour130	Song	0	0
111	4.942	same	same	CORRECT	3	NA	NA	contour136	Speech	0	0
89	1.652	same	same	CORRECT	3	NA	NA	contour135	Song	0	0
91	2.093	same	same	CORRECT	3	NA	NA	contour163	Intermediate	0	0
13	1.624	same	same	CORRECT	3	NA	NA	contour003	Intermediate	0	0
84	2.135	same	same	CORRECT	3	NA	NA	contour068	Speech	0	0
1	3.051	same	same	CORRECT	3	NA	NA	contour185	Intermediate	0	0
47	4.492	same	same	CORRECT	3	NA	NA	contour044	Song	0	0
24	1.313	same	same	CORRECT	3	NA	NA	contour171	Speech	0	0
28	3.681	same	diff	INCORRECT	3	NA	NA	contour148	Intermediate	2.29	2.29
61	5.699	same	diff	INCORRECT	3	NA	NA	contour046	Intermediate	-2.59	2.59
88	1.758	same	diff	INCORRECT	3	NA	NA	contour135	Intermediate	-2.57	2.57
69	3.797	same	diff	INCORRECT	3	NA	NA	contour174	Speech	-2.18	2.18
71	1.532	diff	diff	CORRECT	3	NA	NA	contour174	Song	-1.58	1.58
81	8.032	same	diff	INCORRECT	3	NA	NA	contour057	Speech	-2.74	2.74
103	2.857	same	diff	INCORRECT	3	NA	NA	contour130	Intermediate	1.39	1.39
98	3.028	diff	diff	CORRECT	3	NA	NA	contour083	Song	2.92	2.92
56	1.343	diff	same	INCORRECT	3	NA	NA	contour059	Song	0	0
60	2.205	same	same	CORRECT	3	NA	NA	contour046	Speech	0	0
45	1.611	same	diff	INCORRECT	3	NA	NA	contour044	Speech	0	0
64	1.892	diff	diff	CORRECT	3	NA	NA	contour027	Intermediate	-2.84	2.84
74	1.595	diff	diff	CORRECT	3	NA	NA	contour109	Song	2.71	2.71
32	4.65	same	same	CORRECT	3	NA	NA	contour036	Song	0	0
19	4.633	same	same	CORRECT	3	NA	NA	contour064	Intermediate	0	0
51	3.333	same	same	CORRECT	3	NA	NA	contour073	Speech	0	0
23	2.331	diff	diff	CORRECT	3	NA	NA	contour179	Song	3.16	3.16
3	3.439	same	same	CORRECT	3	NA	NA	contour070	Speech	0	0
114	2.289	diff	diff	CORRECT	3	NA	NA	contour164	Speech	-2.08	2.08
77	2.321	diff	diff	CORRECT	3	NA	NA	contour139	Song	-1.34	1.34
27	2.453	same	same	CORRECT	3	NA	NA	contour148	Speech	0	0
97	1.843	same	same	CORRECT	3	NA	NA	contour083	Intermediate	0	0
38	2.121	same	same	CORRECT	3	NA	NA	contour037	Song	0	0
49	3.941	same	same	CORRECT	3	NA	NA	contour076	Intermediate	0	0
67	1.211	diff	diff	CORRECT	5	98	-0.833333	contour106	Intermediate	1.95	1.95
117	3.063	diff	diff	CORRECT	5	98	-0.833333	contour146	Speech	2.27	2.27
115	1.667	diff	diff	CORRECT	5	98	-0.833333	contour164	Intermediate	1.43	1.43
56	1.401	same	same	CORRECT	5	98	-0.833333	contour059	Song	0	0
104	1.177	same	same	CORRECT	5	98	-0.833333	contour130	Song	0	0
89	1.4	same	same	CORRECT	5	98	-0.833333	contour135	Song	0	0
92	1.197	same	diff	INCORRECT	5	98	-0.833333	contour163	Song	1.59	1.59
111	1.788	same	same	CORRECT	5	98	-0.833333	contour136	Speech	0	0
109	1.054	same	diff	INCORRECT	5	98	-0.833333	contour156	Intermediate	0	0
38	1.459	same	same	CORRECT	5	98	-0.833333	contour037	Song	0	0
9	1.287	diff	same	INCORRECT	5	98	-0.833333	contour012	Speech	0	0
114	1.64	same	diff	INCORRECT	5	98	-0.833333	contour164	Speech	-2.08	2.08
40	1.491	same	diff	INCORRECT	5	98	-0.833333	contour071	Intermediate	2.2	2.2
36	1.349	same	same	CORRECT	5	98	-0.833333	contour037	Speech	0	0
25	1.203	diff	same	INCORRECT	5	98	-0.833333	contour171	Intermediate	0	0
78	2.084	same	diff	INCORRECT	5	98	-0.833333	contour151	Speech	-2.29	2.29
66	1.769	same	same	CORRECT	5	98	-0.833333	contour106	Speech	0	0
70	1.996	same	diff	INCORRECT	5	98	-0.833333	contour174	Intermediate	1.41	1.41
24	1.385	same	same	CORRECT	5	98	-0.833333	contour171	Speech	0	0
63	1.424	same	same	CORRECT	5	98	-0.833333	contour027	Speech	0	0
28	1.329	diff	diff	CORRECT	5	98	-0.833333	contour148	Intermediate	2.29	2.29
69	1.453	same	diff	INCORRECT	5	98	-0.833333	contour174	Speech	-2.18	2.18
82	1.859	same	same	CORRECT	5	98	-0.833333	contour057	Intermediate	0	0
53	1.38	same	same	CORRECT	5	98	-0.833333	contour073	Song	0	0
23	1.616	same	diff	INCORRECT	5	98	-0.833333	contour179	Song	3.16	3.16
76	2.007	same	diff	INCORRECT	5	98	-0.833333	contour139	Intermediate	0	0
75	1.181	same	same	CORRECT	5	98	-0.833333	contour139	Speech	0	0
2	1.471	same	same	CORRECT	5	98	-0.833333	contour185	Song	0	0
45	1.485	same	diff	INCORRECT	5	98	-0.833333	contour044	Speech	0	0
22	1.148	same	diff	INCORRECT	5	98	-0.833333	contour179	Intermediate	-2.56	2.56
52	2.441	same	same	CORRECT	5	98	-0.833333	contour073	Intermediate	0	0
0	1.611	same	diff	INCORRECT	5	98	-0.833333	contour185	Speech	-1.82	1.82
88	1.358	same	diff	INCORRECT	5	98	-0.833333	contour135	Intermediate	-2.57	2.57
41	1.142	same	same	CORRECT	5	98	-0.833333	contour071	Song	0	0
107	2.068	same	diff	INCORRECT	5	98	-0.833333	contour017	Song	3.16	3.16
4	1.148	diff	diff	CORRECT	5	98	-0.833333	contour070	Intermediate	1.01	1.01
118	1.164	diff	diff	CORRECT	5	98	-0.833333	contour146	Intermediate	-2.82	2.82
15	1.674	same	same	CORRECT	5	98	-0.833333	contour178	Speech	0	0
112	3.741	diff	diff	CORRECT	5	98	-0.833333	contour136	Intermediate	-3.21	3.21
108	1.216	same	same	CORRECT	5	98	-0.833333	contour156	Speech	0	0
60	2.665	same	same	CORRECT	5	98	-0.833333	contour046	Speech	0	0
57	1.711	same	same	CORRECT	5	98	-0.833333	contour072	Speech	0	0
86	1.254	diff	diff	CORRECT	5	98	-0.833333	contour068	Song	2.92	2.92
97	2.364	same	same	CORRECT	5	98	-0.833333	contour083	Intermediate	0	0
31	1.109	diff	diff	CORRECT	5	98	-0.833333	contour036	Intermediate	0	0
84	2.342	same	same	CORRECT	5	98	-0.833333	contour068	Speech	0	0
83	1.938	same	same	CORRECT	5	98	-0.833333	contour057	Song	0	0
8	1.038	same	diff	INCORRECT	5	98	-0.833333	contour075	Song	-4.96	4.96
101	1.982	diff	diff	CORRECT	5	98	-0.833333	contour107	Song	2.7	2.7
26	1.106	same	diff	INCORRECT	5	98	-0.833333	contour171	Song	-1.6	1.6
100	2.065	same	same	CORRECT	5	98	-0.833333	contour107	Intermediate	0	0
1	2.175	same	same	CORRECT	5	98	-0.833333	contour185	Intermediate	0	0
20	1.021	diff	diff	CORRECT	5	98	-0.833333	contour064	Song	-1.33	1.33
12	1.818	same	diff	INCORRECT	5	98	-0.833333	contour003	Speech	-2.75	2.75
30	1.276	same	same	CORRECT	5	98	-0.833333	contour036	Speech	0	0
43	2.096	same	diff	INCORRECT	5	98	-0.833333	contour009	Intermediate	-2.34	2.34
16	1.717	same	same	CORRECT	5	98	-0.833333	contour178	Intermediate	0	0
119	1.34	same	diff	INCORRECT	5	98	-0.833333	contour146	Song	-1.47	1.47
103	1.171	same	diff	INCORRECT	5	98	-0.833333	contour130	Intermediate	1.39	1.39
50	1.206	same	same	CORRECT	5	98	-0.833333	contour076	Song	0	0
61	1.097	diff	diff	CORRECT	5	98	-0.833333	contour046	Intermediate	-2.59	2.59
18	2.362	same	same	CORRECT	5	98	-0.833333	contour064	Speech	0	0
35	1.468	same	diff	INCORRECT	5	98	-0.833333	contour103	Song	8.4	8.4
37	1.203	same	same	CORRECT	5	98	-0.833333	contour037	Intermediate	0	0
17	2.259	same	diff	INCORRECT	5	98	-0.833333	contour178	Song	-1.61	1.61
42	1.472	diff	diff	CORRECT	5	98	-0.833333	contour009	Speech	-3.32	3.32
91	2.447	same	same	CORRECT	5	98	-0.833333	contour163	Intermediate	0	0
48	1.18	same	same	CORRECT	5	98	-0.833333	contour076	Speech	0	0
58	1.23	same	same	CORRECT	5	98	-0.833333	contour072	Intermediate	0	0
90	1.408	diff	same	INCORRECT	5	98	-0.833333	contour163	Speech	0	0
27	1.497	diff	same	INCORRECT	5	98	-0.833333	contour148	Speech	0	0
33	1.573	same	same	CORRECT	5	98	-0.833333	contour103	Speech	0	0
11	1.361	same	diff	INCORRECT	5	98	-0.833333	contour012	Song	-1.34	1.34
93	1.37	same	same	CORRECT	5	98	-0.833333	contour047	Speech	0	0
65	1.112	diff	diff	CORRECT	5	98	-0.833333	contour027	Song	2.92	2.92
79	1.351	same	same	CORRECT	5	98	-0.833333	contour151	Intermediate	0	0
77	1.249	same	diff	INCORRECT	5	98	-0.833333	contour139	Song	-1.34	1.34
87	1.251	same	same	CORRECT	5	98	-0.833333	contour135	Speech	0	0
96	4.344	diff	diff	CORRECT	5	98	-0.833333	contour083	Speech	-2.16	2.16
3	1.495	diff	same	INCORRECT	5	98	-0.833333	contour070	Speech	0	0
55	2.845	same	same	CORRECT	5	98	-0.833333	contour059	Intermediate	0	0
116	1.058	same	same	CORRECT	5	98	-0.833333	contour164	Song	0	0
39	1.762	diff	same	INCORRECT	5	98	-0.833333	contour071	Speech	0	0
21	0.978	diff	diff	CORRECT	5	98	-0.833333	contour179	Speech	-3.71	3.71
98	0.918	diff	diff	CORRECT	5	98	-0.833333	contour083	Song	2.92	2.92
106	1.215	diff	diff	CORRECT	5	98	-0.833333	contour017	Intermediate	-3.27	3.27
54	1.033	same	diff	INCORRECT	5	98	-0.833333	contour059	Speech	-1.76	1.76
110	2.651	diff	diff	CORRECT	5	98	-0.833333	contour156	Song	-1.46	1.46
95	0.861	diff	diff	CORRECT	5	98	-0.833333	contour047	Song	-1.46	1.46
6	1.015	same	diff	INCORRECT	5	98	-0.833333	contour075	Speech	2.67	2.67
102	3.67	same	diff	INCORRECT	5	98	-0.833333	contour130	Speech	-1.97	1.97
10	1.885	same	same	CORRECT	5	98	-0.833333	contour012	Intermediate	0	0
85	1.359	diff	same	INCORRECT	5	98	-0.833333	contour068	Intermediate	0	0
94	0.762	diff	diff	CORRECT	5	98	-0.833333	contour047	Intermediate	2.82	2.82
34	1.279	same	same	CORRECT	5	98	-0.833333	contour103	Intermediate	0	0
32	0.925	diff	same	INCORRECT	5	98	-0.833333	contour036	Song	0	0
81	1.199	diff	diff	CORRECT	5	98	-0.833333	contour057	Speech	-2.74	2.74
72	1.123	same	same	CORRECT	5	98	-0.833333	contour109	Speech	0	0
29	1.311	same	diff	INCORRECT	5	98	-0.833333	contour148	Song	1.35	1.35
113	1.273	diff	diff	CORRECT	5	98	-0.833333	contour136	Song	-1.35	1.35
46	1.447	same	same	CORRECT	5	98	-0.833333	contour044	Intermediate	0	0
105	1.737	diff	diff	CORRECT	5	98	-0.833333	contour017	Speech	2.36	2.36
64	1.349	same	diff	INCORRECT	5	98	-0.833333	contour027	Intermediate	-2.84	2.84
44	1.283	same	same	CORRECT	5	98	-0.833333	contour009	Song	0	0
59	1.693	same	same	CORRECT	5	98	-0.833333	contour072	Song	0	0
62	1.027	same	diff	INCORRECT	5	98	-0.833333	contour046	Song	-1.75	1.75
74	1.081	same	diff	INCORRECT	5	98	-0.833333	contour109	Song	2.71	2.71
13	1.988	same	same	CORRECT	5	98	-0.833333	contour003	Intermediate	0	0
71	1.626	diff	diff	CORRECT	5	98	-0.833333	contour174	Song	-1.58	1.58
19	1.399	same	same	CORRECT	5	98	-0.833333	contour064	Intermediate	0	0
49	1.406	same	same	CORRECT	5	98	-0.833333	contour076	Intermediate	0	0
68	1.406	same	same	CORRECT	5	98	-0.833333	contour106	Song	0	0
80	1.116	same	diff	INCORRECT	5	98	-0.833333	contour151	Song	2.92	2.92
99	1.134	same	same	CORRECT	5	98	-0.833333	contour107	Speech	0	0
14	0.984	diff	diff	CORRECT	5	98	-0.833333	contour003	Song	-1.6	1.6
51	1.904	same	same	CORRECT	5	98	-0.833333	contour073	Speech	0	0
7	1.069	same	diff	INCORRECT	5	98	-0.833333	contour075	Intermediate	-5.39	5.39
47	3.031	same	same	CORRECT	5	98	-0.833333	contour044	Song	0	0
5	3.791	same	same	CORRECT	5	98	-0.833333	contour070	Song	0	0
73	0.987	same	diff	INCORRECT	5	98	-0.833333	contour109	Intermediate	-1.65	1.65
116	0.89	same	same	CORRECT	6	49	-0.833333	contour164	Song	0	0
118	3.542	same	diff	INCORRECT	6	49	-0.833333	contour146	Intermediate	-2.82	2.82
14	2.921	diff	diff	CORRECT	6	49	-0.833333	contour003	Song	-1.6	1.6
77	1.588	same	diff	INCORRECT	6	49	-0.833333	contour139	Song	-1.34	1.34
29	0.835	diff	diff	CORRECT	6	49	-0.833333	contour148	Song	1.35	1.35
101	0.937	same	diff	INCORRECT	6	49	-0.833333	contour107	Song	2.7	2.7
0	4.47	diff	diff	CORRECT	6	49	-0.833333	contour185	Speech	-1.82	1.82
108	3.511	same	same	CORRECT	6	49	-0.833333	contour156	Speech	0	0
47	2.874	same	same	CORRECT	6	49	-0.833333	contour044	Song	0	0
50	1.041	same	same	CORRECT	6	49	-0.833333	contour076	Song	0	0
40	2.208	diff	diff	CORRECT	6	49	-0.833333	contour071	Intermediate	2.2	2.2
39	0.876	same	same	CORRECT	6	49	-0.833333	contour071	Speech	0	0
103	1.218	same	diff	INCORRECT	6	49	-0.833333	contour130	Intermediate	1.39	1.39
70	5.8	same	diff	INCORRECT	6	49	-0.833333	contour174	Intermediate	1.41	1.41
17	1.561	diff	diff	CORRECT	6	49	-0.833333	contour178	Song	-1.61	1.61
20	0.702	diff	diff	CORRECT	6	49	-0.833333	contour064	Song	-1.33	1.33
38	1.609	same	same	CORRECT	6	49	-0.833333	contour037	Song	0	0
53	4.196	diff	same	INCORRECT	6	49	-0.833333	contour073	Song	0	0
45	3.251	same	diff	INCORRECT	6	49	-0.833333	contour044	Speech	0	0
83	1.849	diff	same	INCORRECT	6	49	-0.833333	contour057	Song	0	0
28	2.175	same	diff	INCORRECT	6	49	-0.833333	contour148	Intermediate	2.29	2.29
74	1.163	same	diff	INCORRECT	6	49	-0.833333	contour109	Song	2.71	2.71
65	2.013	diff	diff	CORRECT	6	49	-0.833333	contour027	Song	2.92	2.92
7	2.52	same	diff	INCORRECT	6	49	-0.833333	contour075	Intermediate	-5.39	5.39
73	3.094	same	diff	INCORRECT	6	49	-0.833333	contour109	Intermediate	-1.65	1.65
96	8.094	same	diff	INCORRECT	6	49	-0.833333	contour083	Speech	-2.16	2.16
57	1.918	diff	same	INCORRECT	6	49	-0.833333	contour072	Speech	0	0
88	3.58	same	diff	INCORRECT	6	49	-0.833333	contour135	Intermediate	-2.57	2.57
32	6.042	same	same	CORRECT	6	49	-0.833333	contour036	Song	0	0
93	0.853	same	same	CORRECT	6	49	-0.833333	contour047	Speech	0	0
79	5.27	same	same	CORRECT	6	49	-0.833333	contour151	Intermediate	0	0
25	3.612	diff	same	INCORRECT	6	49	-0.833333	contour171	Intermediate	0	0
75	1.844	same	same	CORRECT	6	49	-0.833333	contour139	Speech	0	0
52	5.64	same	same	CORRECT	6	49	-0.833333	contour073	Intermediate	0	0
67	3.09	same	diff	INCORRECT	6	49	-0.833333	contour106	Intermediate	1.95	1.95
31	2.296	diff	diff	CORRECT	6	49	-0.833333	contour036	Intermediate	0	0
26	1.43	same	diff	INCORRECT	6	49	-0.833333	contour171	Song	-1.6	1.6
102	0.795	diff	diff	CORRECT	6	49	-0.833333	contour130	Speech	-1.97	1.97
82	3.9	diff	same	INCORRECT	6	49	-0.833333	contour057	Intermediate	0	0
113	1.256	diff	diff	CORRECT	6	49	-0.833333	contour136	Song	-1.35	1.35
58	4.62	same	same	CORRECT	6	49	-0.833333	contour072	Intermediate	0	0
35	0.914	diff	diff	CORRECT	6	49	-0.833333	contour103	Song	8.4	8.4
78	1.477	same	diff	INCORRECT	6	49	-0.833333	contour151	Speech	-2.29	2.29
99	2.716	same	same	CORRECT	6	49	-0.833333	contour107	Speech	0	0
36	0.74	diff	same	INCORRECT	6	49	-0.833333	contour037	Speech	0	0
94	2.241	same	diff	INCORRECT	6	49	-0.833333	contour047	Intermediate	2.82	2.82
1	0.807	diff	same	INCORRECT	6	49	-0.833333	contour185	Intermediate	0	0
5	2.517	diff	same	INCORRECT	6	49	-0.833333	contour070	Song	0	0
76	1.465	same	diff	INCORRECT	6	49	-0.833333	contour139	Intermediate	0	0
19	0.744	diff	same	INCORRECT	6	49	-0.833333	contour064	Intermediate	0	0
46	1.918	same	same	CORRECT	6	49	-0.833333	contour044	Intermediate	0	0
109	1.79	same	diff	INCORRECT	6	49	-0.833333	contour156	Intermediate	0	0
80	1.024	diff	diff	CORRECT	6	49	-0.833333	contour151	Song	2.92	2.92
111	0.942	same	same	CORRECT	6	49	-0.833333	contour136	Speech	0	0
27	2.062	same	same	CORRECT	6	49	-0.833333	contour148	Speech	0	0
119	0.847	diff	diff	CORRECT	6	49	-0.833333	contour146	Song	-1.47	1.47
9	6.053	same	same	CORRECT	6	49	-0.833333	contour012	Speech	0	0
112	0.644	diff	diff	CORRECT	6	49	-0.833333	contour136	Intermediate	-3.21	3.21
92	1.546	diff	diff	CORRECT	6	49	-0.833333	contour163	Song	1.59	1.59
13	0.625	same	same	CORRECT	6	49	-0.833333	contour003	Intermediate	0	0
33	1.453	diff	same	INCORRECT	6	49	-0.833333	contour103	Speech	0	0
105	1.612	same	diff	INCORRECT	6	49	-0.833333	contour017	Speech	2.36	2.36
51	4.738	diff	same	INCORRECT	6	49	-0.833333	contour073	Speech	0	0
11	1.272	diff	diff	CORRECT	6	49	-0.833333	contour012	Song	-1.34	1.34
3	1.703	same	same	CORRECT	6	49	-0.833333	contour070	Speech	0	0
44	0.925	same	same	CORRECT	6	49	-0.833333	contour009	Song	0	0
63	2.724	diff	same	INCORRECT	6	49	-0.833333	contour027	Speech	0	0
18	8.721	same	same	CORRECT	6	49	-0.833333	contour064	Speech	0	0
89	2.477	same	same	CORRECT	6	49	-0.833333	contour135	Song	0	0
114	2.4	same	diff	INCORRECT	6	49	-0.833333	contour164	Speech	-2.08	2.08
117	0.71	diff	diff	CORRECT	6	49	-0.833333	contour146	Speech	2.27	2.27
106	0.681	diff	diff	CORRECT	6	49	-0.833333	contour017	Intermediate	-3.27	3.27
37	0.858	same	same	CORRECT	6	49	-0.833333	contour037	Intermediate	0	0
100	1.691	same	same	CORRECT	6	49	-0.833333	contour107	Intermediate	0	0
115	1.717	same	diff	INCORRECT	6	49	-0.833333	contour164	Intermediate	1.43	1.43
66	2.288	same	same	CORRECT	6	49	-0.833333	contour106	Speech	0	0
43	5.483	same	diff	INCORRECT	6	49	-0.833333	contour009	Intermediate	-2.34	2.34
8	0.546	diff	diff	CORRECT	6	49	-0.833333	contour075	Song	-4.96	4.96
110	1.43	diff	diff	CORRECT	6	49	-0.833333	contour156	Song	-1.46	1.46
24	1.787	diff	same	INCORRECT	6	49	-0.833333	contour171	Speech	0	0
15	2.286	same	same	CORRECT	6	49	-0.833333	contour178	Speech	0	0
30	1.694	same	same	CORRECT	6	49	-0.833333	contour036	Speech	0	0
85	4.536	diff	same	INCORRECT	6	49	-0.833333	contour068	Intermediate	0	0
87	2.068	diff	same	INCORRECT	6	49	-0.833333	contour135	Speech	0	0
69	5.361	same	diff	INCORRECT	6	49	-0.833333	contour174	Speech	-2.18	2.18
71	1.228	diff	diff	CORRECT	6	49	-0.833333	contour174	Song	-1.58	1.58
64	4.969	same	diff	INCORRECT	6	49	-0.833333	contour027	Intermediate	-2.84	2.84
16	2.984	same	same	CORRECT	6	49	-0.833333	contour178	Intermediate	0	0
59	1.414	same	same	CORRECT	6	49	-0.833333	contour072	Song	0	0
98	0.797	diff	diff	CORRECT	6	49	-0.833333	contour083	Song	2.92	2.92
12	1.994	same	diff	INCORRECT	6	49	-0.833333	contour003	Speech	-2.75	2.75
55	3.292	same	same	CORRECT	6	49	-0.833333	contour059	Intermediate	0	0
81	1.446	diff	diff	CORRECT	6	49	-0.833333	contour057	Speech	-2.74	2.74
4	1.149	diff	diff	CORRECT	6	49	-0.833333	contour070	Intermediate	1.01	1.01
56	1.892	same	same	CORRECT	6	49	-0.833333	contour059	Song	0	0
91	1.36	diff	same	INCORRECT	6	49	-0.833333	contour163	Intermediate	0	0
107	1.832	same	diff	INCORRECT	6	49	-0.833333	contour017	Song	3.16	3.16
86	5.043	same	diff	INCORRECT	6	49	-0.833333	contour068	Song	2.92	2.92
49	1.757	same	same	CORRECT	6	49	-0.833333	contour076	Intermediate	0	0
62	2.952	same	diff	INCORRECT	6	49	-0.833333	contour046	Song	-1.75	1.75
10	5.746	diff	same	INCORRECT	6	49	-0.833333	contour012	Intermediate	0	0
97	0.841	same	same	CORRECT	6	49	-0.833333	contour083	Intermediate	0	0
60	2.213	same	same	CORRECT	6	49	-0.833333	contour046	Speech	0	0
2	1.977	same	same	CORRECT	6	49	-0.833333	contour185	Song	0	0
42	2.579	diff	diff	CORRECT	6	49	-0.833333	contour009	Speech	-3.32	3.32
6	0.714	diff	diff	CORRECT	6	49	-0.833333	contour075	Speech	2.67	2.67
84	2.008	same	same	CORRECT	6	49	-0.833333	contour068	Speech	0	0
95	0.776	diff	diff	CORRECT	6	49	-0.833333	contour047	Song	-1.46	1.46
23	1.004	diff	diff	CORRECT	6	49	-0.833333	contour179	Song	3.16	3.16
21	2.302	same	diff	INCORRECT	6	49	-0.833333	contour179	Speech	-3.71	3.71
34	0.548	diff	same	INCORRECT	6	49	-0.833333	contour103	Intermediate	0	0
61	2.273	same	diff	INCORRECT	6	49	-0.833333	contour046	Intermediate	-2.59	2.59
90	0.644	diff	same	INCORRECT	6	49	-0.833333	contour163	Speech	0	0
48	2.156	same	same	CORRECT	6	49	-0.833333	contour076	Speech	0	0
72	1.085	diff	same	INCORRECT	6	49	-0.833333	contour109	Speech	0	0
22	2.22	diff	diff	CORRECT	6	49	-0.833333	contour179	Intermediate	-2.56	2.56
68	1.225	same	same	CORRECT	6	49	-0.833333	contour106	Song	0	0
54	1	diff	diff	CORRECT	6	49	-0.833333	contour059	Speech	-1.76	1.76
41	1.238	same	same	CORRECT	6	49	-0.833333	contour071	Song	0	0
104	2.076	same	same	CORRECT	6	49	-0.833333	contour130	Song	0	0
20	0.973	diff	diff	CORRECT	7	86	-0.833333	contour064	Song	-1.33	1.33
103	0.81	diff	diff	CORRECT	7	86	-0.833333	contour130	Intermediate	1.39	1.39
43	1.107	diff	diff	CORRECT	7	86	-0.833333	contour009	Intermediate	-2.34	2.34
2	0.796	same	same	CORRECT	7	86	-0.833333	contour185	Song	0	0
74	0.877	same	diff	INCORRECT	7	86	-0.833333	contour109	Song	2.71	2.71
115	1.069	same	diff	INCORRECT	7	86	-0.833333	contour164	Intermediate	1.43	1.43
6	0.666	same	diff	INCORRECT	7	86	-0.833333	contour075	Speech	2.67	2.67
48	0.854	same	same	CORRECT	7	86	-0.833333	contour076	Speech	0	0
33	0.532	same	same	CORRECT	7	86	-0.833333	contour103	Speech	0	0
86	0.976	diff	diff	CORRECT	7	86	-0.833333	contour068	Song	2.92	2.92
3	1.611	diff	same	INCORRECT	7	86	-0.833333	contour070	Speech	0	0
28	1.366	diff	diff	CORRECT	7	86	-0.833333	contour148	Intermediate	2.29	2.29
41	2.234	same	same	CORRECT	7	86	-0.833333	contour071	Song	0	0
94	0.721	diff	diff	CORRECT	7	86	-0.833333	contour047	Intermediate	2.82	2.82
112	1.126	same	diff	INCORRECT	7	86	-0.833333	contour136	Intermediate	-3.21	3.21
67	0.805	diff	diff	CORRECT	7	86	-0.833333	contour106	Intermediate	1.95	1.95
59	1.412	diff	same	INCORRECT	7	86	-0.833333	contour072	Song	0	0
1	0.983	same	same	CORRECT	7	86	-0.833333	contour185	Intermediate	0	0
37	1.05	same	same	CORRECT	7	86	-0.833333	contour037	Intermediate	0	0
55	1.885	diff	same	INCORRECT	7	86	-0.833333	contour059	Intermediate	0	0
50	0.825	same	same	CORRECT	7	86	-0.833333	contour076	Song	0	0
52	5.172	diff	same	INCORRECT	7	86	-0.833333	contour073	Intermediate	0	0
119	0.96	same	diff	INCORRECT	7	86	-0.833333	contour146	Song	-1.47	1.47
19	1.16	diff	same	INCORRECT	7	86	-0.833333	contour064	Intermediate	0	0
79	4.748	diff	same	INCORRECT	7	86	-0.833333	contour151	Intermediate	0	0
8	0.903	same	diff	INCORRECT	7	86	-0.833333	contour075	Song	-4.96	4.96
95	0.885	diff	diff	CORRECT	7	86	-0.833333	contour047	Song	-1.46	1.46
116	0.586	same	same	CORRECT	7	86	-0.833333	contour164	Song	0	0
93	1.322	same	same	CORRECT	7	86	-0.833333	contour047	Speech	0	0
83	0.942	same	same	CORRECT	7	86	-0.833333	contour057	Song	0	0
87	1.099	same	same	CORRECT	7	86	-0.833333	contour135	Speech	0	0
77	0.989	same	diff	INCORRECT	7	86	-0.833333	contour139	Song	-1.34	1.34
65	1.076	diff	diff	CORRECT	7	86	-0.833333	contour027	Song	2.92	2.92
32	2.209	same	same	CORRECT	7	86	-0.833333	contour036	Song	0	0
57	1.912	diff	same	INCORRECT	7	86	-0.833333	contour072	Speech	0	0
35	0.706	same	diff	INCORRECT	7	86	-0.833333	contour103	Song	8.4	8.4
26	0.885	same	diff	INCORRECT	7	86	-0.833333	contour171	Song	-1.6	1.6
23	1.563	same	diff	INCORRECT	7	86	-0.833333	contour179	Song	3.16	3.16
78	1.032	diff	diff	CORRECT	7	86	-0.833333	contour151	Speech	-2.29	2.29
71	0.66	same	diff	INCORRECT	7	86	-0.833333	contour174	Song	-1.58	1.58
101	1.685	same	diff	INCORRECT	7	86	-0.833333	contour107	Song	2.7	2.7
46	1.043	diff	same	INCORRECT	7	86	-0.833333	contour044	Intermediate	0	0
100	1.042	same	same	CORRECT	7	86	-0.833333	contour107	Intermediate	0	0
56	1.1	same	same	CORRECT	7	86	-0.833333	contour059	Song	0	0
106	0.918	diff	diff	CORRECT	7	86	-0.833333	contour017	Intermediate	-3.27	3.27
49	1.369	same	same	CORRECT	7	86	-0.833333	contour076	Intermediate	0	0
109	1.181	same	diff	INCORRECT	7	86	-0.833333	contour156	Intermediate	0	0
113	0.927	diff	diff	CORRECT	7	86	-0.833333	contour136	Song	-1.35	1.35
107	0.962	same	diff	INCORRECT	7	86	-0.833333	contour017	Song	3.16	3.16
24	0.911	same	same	CORRECT	7	86	-0.833333	contour171	Speech	0	0
29	0.896	diff	diff	CORRECT	7	86	-0.833333	contour148	Song	1.35	1.35
117	3.446	diff	diff	CORRECT	7	86	-0.833333	contour146	Speech	2.27	2.27
108	1.351	same	same	CORRECT	7	86	-0.833333	contour156	Speech	0	0
63	0.865	same	same	CORRECT	7	86	-0.833333	contour027	Speech	0	0
9	1.08	same	same	CORRECT	7	86	-0.833333	contour012	Speech	0	0
54	3.09	diff	diff	CORRECT	7	86	-0.833333	contour059	Speech	-1.76	1.76
82	0.937	same	same	CORRECT	7	86	-0.833333	contour057	Intermediate	0	0
91	2.518	diff	same	INCORRECT	7	86	-0.833333	contour163	Intermediate	0	0
12	0.732	same	diff	INCORRECT	7	86	-0.833333	contour003	Speech	-2.75	2.75
13	0.868	same	same	CORRECT	7	86	-0.833333	contour003	Intermediate	0	0
92	1.135	same	diff	INCORRECT	7	86	-0.833333	contour163	Song	1.59	1.59
76	1.248	diff	diff	CORRECT	7	86	-0.833333	contour139	Intermediate	0	0
73	2.535	same	diff	INCORRECT	7	86	-0.833333	contour109	Intermediate	-1.65	1.65
5	1.257	diff	same	INCORRECT	7	86	-0.833333	contour070	Song	0	0
99	0.884	same	same	CORRECT	7	86	-0.833333	contour107	Speech	0	0
102	0.935	same	diff	INCORRECT	7	86	-0.833333	contour130	Speech	-1.97	1.97
89	1.891	same	same	CORRECT	7	86	-0.833333	contour135	Song	0	0
70	0.984	diff	diff	CORRECT	7	86	-0.833333	contour174	Intermediate	1.41	1.41
17	1.065	same	diff	INCORRECT	7	86	-0.833333	contour178	Song	-1.61	1.61
66	0.809	same	same	CORRECT	7	86	-0.833333	contour106	Speech	0	0
7	0.743	diff	diff	CORRECT	7	86	-0.833333	contour075	Intermediate	-5.39	5.39
22	1.103	same	diff	INCORRECT	7	86	-0.833333	contour179	Intermediate	-2.56	2.56
114	0.895	same	diff	INCORRECT	7	86	-0.833333	contour164	Speech	-2.08	2.08
64	0.781	same	diff	INCORRECT	7	86	-0.833333	contour027	Intermediate	-2.84	2.84
96	1.04	diff	diff	CORRECT	7	86	-0.833333	contour083	Speech	-2.16	2.16
42	1.27	same	diff	INCORRECT	7	86	-0.833333	contour009	Speech	-3.32	3.32
25	0.83	same	same	CORRECT	7	86	-0.833333	contour171	Intermediate	0	0
16	1.115	same	same	CORRECT	7	86	-0.833333	contour178	Intermediate	0	0
21	0.828	same	diff	INCORRECT	7	86	-0.833333	contour179	Speech	-3.71	3.71
40	1.21	same	diff	INCORRECT	7	86	-0.833333	contour071	Intermediate	2.2	2.2
68	0.961	diff	same	INCORRECT	7	86	-0.833333	contour106	Song	0	0
51	0.86	same	same	CORRECT	7	86	-0.833333	contour073	Speech	0	0
75	0.911	diff	same	INCORRECT	7	86	-0.833333	contour139	Speech	0	0
69	0.643	same	diff	INCORRECT	7	86	-0.833333	contour174	Speech	-2.18	2.18
111	2.514	diff	same	INCORRECT	7	86	-0.833333	contour136	Speech	0	0
97	0.609	same	same	CORRECT	7	86	-0.833333	contour083	Intermediate	0	0
81	0.767	diff	diff	CORRECT	7	86	-0.833333	contour057	Speech	-2.74	2.74
60	4.056	same	same	CORRECT	7	86	-0.833333	contour046	Speech	0	0
104	1.627	diff	same	INCORRECT	7	86	-0.833333	contour130	Song	0	0
72	0.763	diff	same	INCORRECT	7	86	-0.833333	contour109	Speech	0	0
11	1.248	diff	diff	CORRECT	7	86	-0.833333	contour012	Song	-1.34	1.34
98	0.611	same	diff	INCORRECT	7	86	-0.833333	contour083	Song	2.92	2.92
85	0.803	diff	same	INCORRECT	7	86	-0.833333	contour068	Intermediate	0	0
38	0.898	same	same	CORRECT	7	86	-0.833333	contour037	Song	0	0
18	1.035	same	same	CORRECT	7	86	-0.833333	contour064	Speech	0	0
30	0.652	diff	same	INCORRECT	7	86	-0.833333	contour036	Speech	0	0
10	1.777	same	same	CORRECT	7	86	-0.833333	contour012	Intermediate	0	0
80	0.792	diff	diff	CORRECT	7	86	-0.833333	contour151	Song	2.92	2.92
34	0.5	same	same	CORRECT	7	86	-0.833333	contour103	Intermediate	0	0
58	0.76	same	same	CORRECT	7	86	-0.833333	contour072	Intermediate	0	0
31	0.69	same	diff	INCORRECT	7	86	-0.833333	contour036	Intermediate	0	0
36	0.646	same	same	CORRECT	7	86	-0.833333	contour037	Speech	0	0
90	4.357	diff	same	INCORRECT	7	86	-0.833333	contour163	Speech	0	0
15	0.675	same	same	CORRECT	7	86	-0.833333	contour178	Speech	0	0
88	1.88	same	diff	INCORRECT	7	86	-0.833333	contour135	Intermediate	-2.57	2.57
39	0.623	same	same	CORRECT	7	86	-0.833333	contour071	Speech	0	0
27	2.083	diff	same	INCORRECT	7	86	-0.833333	contour148	Speech	0	0
53	3.125	diff	same	INCORRECT	7	86	-0.833333	contour073	Song	0	0
110	0.835	same	diff	INCORRECT	7	86	-0.833333	contour156	Song	-1.46	1.46
0	0.823	diff	diff	CORRECT	7	86	-0.833333	contour185	Speech	-1.82	1.82
4	0.904	diff	diff	CORRECT	7	86	-0.833333	contour070	Intermediate	1.01	1.01
45	2.167	diff	diff	CORRECT	7	86	-0.833333	contour044	Speech	0	0
84	0.725	same	same	CORRECT	7	86	-0.833333	contour068	Speech	0	0
118	0.653	same	diff	INCORRECT	7	86	-0.833333	contour146	Intermediate	-2.82	2.82
105	0.712	diff	diff	CORRECT	7	86	-0.833333	contour017	Speech	2.36	2.36
44	0.58	diff	same	INCORRECT	7	86	-0.833333	contour009	Song	0	0
14	0.556	same	diff	INCORRECT	7	86	-0.833333	contour003	Song	-1.6	1.6
62	1.012	same	diff	INCORRECT	7	86	-0.833333	contour046	Song	-1.75	1.75
47	0.878	diff	same	INCORRECT	7	86	-0.833333	contour044	Song	0	0
61	1.357	same	diff	INCORRECT	7	86	-0.833333	contour046	Intermediate	-2.59	2.59
11	1.762	same	diff	INCORRECT	8	43	-0.333333	contour012	Song	-1.34	1.34
102	0.945	diff	diff	CORRECT	8	43	-0.333333	contour130	Speech	-1.97	1.97
42	1.728	diff	diff	CORRECT	8	43	-0.333333	contour009	Speech	-3.32	3.32
78	0.996	same	diff	INCORRECT	8	43	-0.333333	contour151	Speech	-2.29	2.29
62	0.989	same	diff	INCORRECT	8	43	-0.333333	contour046	Song	-1.75	1.75
40	3.735	diff	diff	CORRECT	8	43	-0.333333	contour071	Intermediate	2.2	2.2
43	4.112	same	diff	INCORRECT	8	43	-0.333333	contour009	Intermediate	-2.34	2.34
36	1.153	same	same	CORRECT	8	43	-0.333333	contour037	Speech	0	0
49	2.482	same	same	CORRECT	8	43	-0.333333	contour076	Intermediate	0	0
21	0.938	diff	diff	CORRECT	8	43	-0.333333	contour179	Speech	-3.71	3.71
60	1.679	same	same	CORRECT	8	43	-0.333333	contour046	Speech	0	0
118	1.92	diff	diff	CORRECT	8	43	-0.333333	contour146	Intermediate	-2.82	2.82
25	1.35	same	same	CORRECT	8	43	-0.333333	contour171	Intermediate	0	0
70	1.233	same	diff	INCORRECT	8	43	-0.333333	contour174	Intermediate	1.41	1.41
50	1.698	diff	same	INCORRECT	8	43	-0.333333	contour076	Song	0	0
8	0.831	same	diff	INCORRECT	8	43	-0.333333	contour075	Song	-4.96	4.96
23	1.935	diff	diff	CORRECT	8	43	-0.333333	contour179	Song	3.16	3.16
72	1.199	same	same	CORRECT	8	43	-0.333333	contour109	Speech	0	0
107	0.93	diff	diff	CORRECT	8	43	-0.333333	contour017	Song	3.16	3.16
7	4.158	same	diff	INCORRECT	8	43	-0.333333	contour075	Intermediate	-5.39	5.39
96	1.53	same	diff	INCORRECT	8	43	-0.333333	contour083	Speech	-2.16	2.16
114	3.894	same	diff	INCORRECT	8	43	-0.333333	contour164	Speech	-2.08	2.08
45	2.124	diff	diff	CORRECT	8	43	-0.333333	contour044	Speech	0	0
30	5.077	diff	same	INCORRECT	8	43	-0.333333	contour036	Speech	0	0
55	1.447	same	same	CORRECT	8	43	-0.333333	contour059	Intermediate	0	0
48	1.378	diff	same	INCORRECT	8	43	-0.333333	contour076	Speech	0	0
53	1.583	same	same	CORRECT	8	43	-0.333333	contour073	Song	0	0
108	1.451	same	same	CORRECT	8	43	-0.333333	contour156	Speech	0	0
103	1.21	diff	diff	CORRECT	8	43	-0.333333	contour130	Intermediate	1.39	1.39
100	1.616	diff	same	INCORRECT	8	43	-0.333333	contour107	Intermediate	0	0
28	0.831	diff	diff	CORRECT	8	43	-0.333333	contour148	Intermediate	2.29	2.29
26	1.446	same	diff	INCORRECT	8	43	-0.333333	contour171	Song	-1.6	1.6
18	1.075	same	same	CORRECT	8	43	-0.333333	contour064	Speech	0	0
1	1.712	same	same	CORRECT	8	43	-0.333333	contour185	Intermediate	0	0
31	1.095	same	diff	INCORRECT	8	43	-0.333333	contour036	Intermediate	0	0
65	2.733	diff	diff	CORRECT	8	43	-0.333333	contour027	Song	2.92	2.92
38	2.383	diff	same	INCORRECT	8	43	-0.333333	contour037	Song	0	0
64	1.847	same	diff	INCORRECT	8	43	-0.333333	contour027	Intermediate	-2.84	2.84
77	2.892	same	diff	INCORRECT	8	43	-0.333333	contour139	Song	-1.34	1.34
24	1.424	diff	same	INCORRECT	8	43	-0.333333	contour171	Speech	0	0
84	2.923	diff	same	INCORRECT	8	43	-0.333333	contour068	Speech	0	0
58	1.901	diff	same	INCORRECT	8	43	-0.333333	contour072	Intermediate	0	0
3	1.363	same	same	CORRECT	8	43	-0.333333	contour070	Speech	0	0
116	1.661	diff	same	INCORRECT	8	43	-0.333333	contour164	Song	0	0
10	3.824	same	same	CORRECT	8	43	-0.333333	contour012	Intermediate	0	0
81	1.303	same	diff	INCORRECT	8	43	-0.333333	contour057	Speech	-2.74	2.74
34	3.509	diff	same	INCORRECT	8	43	-0.333333	contour103	Intermediate	0	0
110	1.326	diff	diff	CORRECT	8	43	-0.333333	contour156	Song	-1.46	1.46
67	1.532	diff	diff	CORRECT	8	43	-0.333333	contour106	Intermediate	1.95	1.95
35	1.349	same	diff	INCORRECT	8	43	-0.333333	contour103	Song	8.4	8.4
14	3.664	diff	diff	CORRECT	8	43	-0.333333	contour003	Song	-1.6	1.6
69	1.393	diff	diff	CORRECT	8	43	-0.333333	contour174	Speech	-2.18	2.18
4	1.633	same	diff	INCORRECT	8	43	-0.333333	contour070	Intermediate	1.01	1.01
2	1.008	diff	same	INCORRECT	8	43	-0.333333	contour185	Song	0	0
86	0.549	same	diff	INCORRECT	8	43	-0.333333	contour068	Song	2.92	2.92
61	1.447	diff	diff	CORRECT	8	43	-0.333333	contour046	Intermediate	-2.59	2.59
56	3.163	diff	same	INCORRECT	8	43	-0.333333	contour059	Song	0	0
46	1.687	same	same	CORRECT	8	43	-0.333333	contour044	Intermediate	0	0
93	2.317	same	same	CORRECT	8	43	-0.333333	contour047	Speech	0	0
92	1.133	same	diff	INCORRECT	8	43	-0.333333	contour163	Song	1.59	1.59
63	1.734	same	same	CORRECT	8	43	-0.333333	contour027	Speech	0	0
80	1.601	same	diff	INCORRECT	8	43	-0.333333	contour151	Song	2.92	2.92
27	1.937	diff	same	INCORRECT	8	43	-0.333333	contour148	Speech	0	0
59	1.505	diff	same	INCORRECT	8	43	-0.333333	contour072	Song	0	0
5	2.358	diff	same	INCORRECT	8	43	-0.333333	contour070	Song	0	0
12	1.598	same	diff	INCORRECT	8	43	-0.333333	contour003	Speech	-2.75	2.75
73	1.036	same	diff	INCORRECT	8	43	-0.333333	contour109	Intermediate	-1.65	1.65
29	2.412	diff	diff	CORRECT	8	43	-0.333333	contour148	Song	1.35	1.35
119	1.378	same	diff	INCORRECT	8	43	-0.333333	contour146	Song	-1.47	1.47
105	1.412	diff	diff	CORRECT	8	43	-0.333333	contour017	Speech	2.36	2.36
111	1.351	diff	same	INCORRECT	8	43	-0.333333	contour136	Speech	0	0
74	1.88	diff	diff	CORRECT	8	43	-0.333333	contour109	Song	2.71	2.71
66	1.531	same	same	CORRECT	8	43	-0.333333	contour106	Speech	0	0
0	1.813	diff	diff	CORRECT	8	43	-0.333333	contour185	Speech	-1.82	1.82
6	1.657	same	diff	INCORRECT	8	43	-0.333333	contour075	Speech	2.67	2.67
52	0.972	diff	same	INCORRECT	8	43	-0.333333	contour073	Intermediate	0	0
71	1.574	diff	diff	CORRECT	8	43	-0.333333	contour174	Song	-1.58	1.58
76	1.378	same	diff	INCORRECT	8	43	-0.333333	contour139	Intermediate	0	0
39	1.207	diff	same	INCORRECT	8	43	-0.333333	contour071	Speech	0	0
90	2.119	same	same	CORRECT	8	43	-0.333333	contour163	Speech	0	0
16	1.34	diff	same	INCORRECT	8	43	-0.333333	contour178	Intermediate	0	0
57	1.561	diff	same	INCORRECT	8	43	-0.333333	contour072	Speech	0	0
68	0.83	same	same	CORRECT	8	43	-0.333333	contour106	Song	0	0
79	1.836	diff	same	INCORRECT	8	43	-0.333333	contour151	Intermediate	0	0
117	1.626	same	diff	INCORRECT	8	43	-0.333333	contour146	Speech	2.27	2.27
98	1.107	same	diff	INCORRECT	8	43	-0.333333	contour083	Song	2.92	2.92
95	1.79	diff	diff	CORRECT	8	43	-0.333333	contour047	Song	-1.46	1.46
88	1.004	same	diff	INCORRECT	8	43	-0.333333	contour135	Intermediate	-2.57	2.57
106	2.01	diff	diff	CORRECT	8	43	-0.333333	contour017	Intermediate	-3.27	3.27
20	1.045	diff	diff	CORRECT	8	43	-0.333333	contour064	Song	-1.33	1.33
94	3.168	diff	diff	CORRECT	8	43	-0.333333	contour047	Intermediate	2.82	2.82
41	1.239	same	same	CORRECT	8	43	-0.333333	contour071	Song	0	0
115	0.891	same	diff	INCORRECT	8	43	-0.333333	contour164	Intermediate	1.43	1.43
22	1.278	diff	diff	CORRECT	8	43	-0.333333	contour179	Intermediate	-2.56	2.56
75	1.326	diff	same	INCORRECT	8	43	-0.333333	contour139	Speech	0	0
33	0.727	same	same	CORRECT	8	43	-0.333333	contour103	Speech	0	0
15	1.511	same	same	CORRECT	8	43	-0.333333	contour178	Speech	0	0
51	1.326	diff	same	INCORRECT	8	43	-0.333333	contour073	Speech	0	0
109	0.763	diff	diff	CORRECT	8	43	-0.333333	contour156	Intermediate	0	0
17	1.374	diff	diff	CORRECT	8	43	-0.333333	contour178	Song	-1.61	1.61
47	2.509	same	same	CORRECT	8	43	-0.333333	contour044	Song	0	0
44	0.971	same	same	CORRECT	8	43	-0.333333	contour009	Song	0	0
19	1.598	diff	same	INCORRECT	8	43	-0.333333	contour064	Intermediate	0	0
89	1.742	same	same	CORRECT	8	43	-0.333333	contour135	Song	0	0
54	1.064	same	diff	INCORRECT	8	43	-0.333333	contour059	Speech	-1.76	1.76
37	0.876	same	same	CORRECT	8	43	-0.333333	contour037	Intermediate	0	0
83	1.307	same	same	CORRECT	8	43	-0.333333	contour057	Song	0	0
91	7.998	same	same	CORRECT	8	43	-0.333333	contour163	Intermediate	0	0
9	1.041	same	same	CORRECT	8	43	-0.333333	contour012	Speech	0	0
101	1.601	same	diff	INCORRECT	8	43	-0.333333	contour107	Song	2.7	2.7
87	1.16	diff	same	INCORRECT	8	43	-0.333333	contour135	Speech	0	0
99	1.157	same	same	CORRECT	8	43	-0.333333	contour107	Speech	0	0
32	0.88	same	same	CORRECT	8	43	-0.333333	contour036	Song	0	0
85	1.875	diff	same	INCORRECT	8	43	-0.333333	contour068	Intermediate	0	0
113	1.19	diff	diff	CORRECT	8	43	-0.333333	contour136	Song	-1.35	1.35
13	1.176	same	same	CORRECT	8	43	-0.333333	contour003	Intermediate	0	0
112	1.475	diff	diff	CORRECT	8	43	-0.333333	contour136	Intermediate	-3.21	3.21
97	1.656	diff	same	INCORRECT	8	43	-0.333333	contour083	Intermediate	0	0
104	1.152	same	same	CORRECT	8	43	-0.333333	contour130	Song	0	0
82	1.136	diff	same	INCORRECT	8	43	-0.333333	contour057	Intermediate	0	0
105	1.969	same	diff	INCORRECT	9	94	-1	contour017	Speech	2.36	2.36
110	3.623	same	diff	INCORRECT	9	94	-1	contour156	Song	-1.46	1.46
82	1.225	diff	same	INCORRECT	9	94	-1	contour057	Intermediate	0	0
54	2.061	same	diff	INCORRECT	9	94	-1	contour059	Speech	-1.76	1.76
21	2.122	same	diff	INCORRECT	9	94	-1	contour179	Speech	-3.71	3.71
5	1.579	diff	same	INCORRECT	9	94	-1	contour070	Song	0	0
6	1.778	same	diff	INCORRECT	9	94	-1	contour075	Speech	2.67	2.67
85	2.997	same	same	CORRECT	9	94	-1	contour068	Intermediate	0	0
27	2.579	same	same	CORRECT	9	94	-1	contour148	Speech	0	0
36	1.42	same	same	CORRECT	9	94	-1	contour037	Speech	0	0
58	1.652	same	same	CORRECT	9	94	-1	contour072	Intermediate	0	0
74	19.255	same	diff	INCORRECT	9	94	-1	contour109	Song	2.71	2.71
89	1.097	same	same	CORRECT	9	94	-1	contour135	Song	0	0
66	2.163	same	same	CORRECT	9	94	-1	contour106	Speech	0	0
115	2.078	same	diff	INCORRECT	9	94	-1	contour164	Intermediate	1.43	1.43
1	1.674	same	same	CORRECT	9	94	-1	contour185	Intermediate	0	0
118	1.2	same	diff	INCORRECT	9	94	-1	contour146	Intermediate	-2.82	2.82
9	0.882	diff	same	INCORRECT	9	94	-1	contour012	Speech	0	0
11	1.149	same	diff	INCORRECT	9	94	-1	contour012	Song	-1.34	1.34
14	1.528	diff	diff	CORRECT	9	94	-1	contour003	Song	-1.6	1.6
56	1.911	same	same	CORRECT	9	94	-1	contour059	Song	0	0
32	2.602	same	same	CORRECT	9	94	-1	contour036	Song	0	0
4	2.611	same	diff	INCORRECT	9	94	-1	contour070	Intermediate	1.01	1.01
40	3.308	same	diff	INCORRECT	9	94	-1	contour071	Intermediate	2.2	2.2
55	2.274	same	same	CORRECT	9	94	-1	contour059	Intermediate	0	0
24	1.667	diff	same	INCORRECT	9	94	-1	contour171	Speech	0	0
88	1.709	same	diff	INCORRECT	9	94	-1	contour135	Intermediate	-2.57	2.57
37	1.544	same	same	CORRECT	9	94	-1	contour037	Intermediate	0	0
78	1.626	same	diff	INCORRECT	9	94	-1	contour151	Speech	-2.29	2.29
62	1.849	diff	diff	CORRECT	9	94	-1	contour046	Song	-1.75	1.75
70	1.875	diff	diff	CORRECT	9	94	-1	contour174	Intermediate	1.41	1.41
96	1.499	same	diff	INCORRECT	9	94	-1	contour083	Speech	-2.16	2.16
38	1.39	diff	same	INCORRECT	9	94	-1	contour037	Song	0	0
63	1.546	diff	same	INCORRECT	9	94	-1	contour027	Speech	0	0
34	4.818	same	same	CORRECT	9	94	-1	contour103	Intermediate	0	0
44	1.211	same	same	CORRECT	9	94	-1	contour009	Song	0	0
35	1.798	same	diff	INCORRECT	9	94	-1	contour103	Song	8.4	8.4
61	1.503	same	diff	INCORRECT	9	94	-1	contour046	Intermediate	-2.59	2.59
83	1.775	same	same	CORRECT	9	94	-1	contour057	Song	0	0
45	1.391	same	diff	INCORRECT	9	94	-1	contour044	Speech	0	0
41	2.638	same	same	CORRECT	9	94	-1	contour071	Song	0	0
23	2.248	same	diff	INCORRECT	9	94	-1	contour179	Song	3.16	3.16
0	1.527	same	diff	INCORRECT	9	94	-1	contour185	Speech	-1.82	1.82
43	1.279	diff	diff	CORRECT	9	94	-1	contour009	Intermediate	-2.34	2.34
47	1.491	same	same	CORRECT	9	94	-1	contour044	Song	0	0
31	0.821	diff	diff	CORRECT	9	94	-1	contour036	Intermediate	0	0
12	2.783	same	diff	INCORRECT	9	94	-1	contour003	Speech	-2.75	2.75
72	1.476	same	same	CORRECT	9	94	-1	contour109	Speech	0	0
87	2.165	same	same	CORRECT	9	94	-1	contour135	Speech	0	0
65	1.647	diff	diff	CORRECT	9	94	-1	contour027	Song	2.92	2.92
77	2.156	same	diff	INCORRECT	9	94	-1	contour139	Song	-1.34	1.34
3	3.453	diff	same	INCORRECT	9	94	-1	contour070	Speech	0	0
57	1.917	same	same	CORRECT	9	94	-1	contour072	Speech	0	0
114	2.39	same	diff	INCORRECT	9	94	-1	contour164	Speech	-2.08	2.08
95	1.903	same	diff	INCORRECT	9	94	-1	contour047	Song	-1.46	1.46
10	1.133	same	same	CORRECT	9	94	-1	contour012	Intermediate	0	0
46	0.904	same	same	CORRECT	9	94	-1	contour044	Intermediate	0	0
103	1.042	same	diff	INCORRECT	9	94	-1	contour130	Intermediate	1.39	1.39
91	1.167	same	same	CORRECT	9	94	-1	contour163	Intermediate	0	0
2	1.998	same	same	CORRECT	9	94	-1	contour185	Song	0	0
52	2.323	same	same	CORRECT	9	94	-1	contour073	Intermediate	0	0
109	1.368	same	diff	INCORRECT	9	94	-1	contour156	Intermediate	0	0
119	1.309	diff	diff	CORRECT	9	94	-1	contour146	Song	-1.47	1.47
67	1.675	same	diff	INCORRECT	9	94	-1	contour106	Intermediate	1.95	1.95
49	2.677	same	same	CORRECT	9	94	-1	contour076	Intermediate	0	0
104	1.41	same	same	CORRECT	9	94	-1	contour130	Song	0	0
30	2.383	same	same	CORRECT	9	94	-1	contour036	Speech	0	0
101	1.039	same	diff	INCORRECT	9	94	-1	contour107	Song	2.7	2.7
112	3.356	same	diff	INCORRECT	9	94	-1	contour136	Intermediate	-3.21	3.21
28	1.581	diff	diff	CORRECT	9	94	-1	contour148	Intermediate	2.29	2.29
73	1.742	same	diff	INCORRECT	9	94	-1	contour109	Intermediate	-1.65	1.65
108	1.368	same	same	CORRECT	9	94	-1	contour156	Speech	0	0
84	0.832	same	same	CORRECT	9	94	-1	contour068	Speech	0	0
17	1.743	same	diff	INCORRECT	9	94	-1	contour178	Song	-1.61	1.61
116	1.213	diff	same	INCORRECT	9	94	-1	contour164	Song	0	0
81	1.335	same	diff	INCORRECT	9	94	-1	contour057	Speech	-2.74	2.74
13	1.919	same	same	CORRECT	9	94	-1	contour003	Intermediate	0	0
33	1.775	same	same	CORRECT	9	94	-1	contour103	Speech	0	0
51	1.353	same	same	CORRECT	9	94	-1	contour073	Speech	0	0
20	2.244	same	diff	INCORRECT	9	94	-1	contour064	Song	-1.33	1.33
100	2.422	same	same	CORRECT	9	94	-1	contour107	Intermediate	0	0
26	0.735	diff	diff	CORRECT	9	94	-1	contour171	Song	-1.6	1.6
80	1.842	same	diff	INCORRECT	9	94	-1	contour151	Song	2.92	2.92
42	1.663	same	diff	INCORRECT	9	94	-1	contour009	Speech	-3.32	3.32
39	1.715	same	same	CORRECT	9	94	-1	contour071	Speech	0	0
15	2.539	same	same	CORRECT	9	94	-1	contour178	Speech	0	0
69	1.408	same	diff	INCORRECT	9	94	-1	contour174	Speech	-2.18	2.18
113	1.64	same	diff	INCORRECT	9	94	-1	contour136	Song	-1.35	1.35
64	1.658	same	diff	INCORRECT	9	94	-1	contour027	Intermediate	-2.84	2.84
19	2.081	same	same	CORRECT	9	94	-1	contour064	Intermediate	0	0
99	1.415	same	same	CORRECT	9	94	-1	contour107	Speech	0	0
97	1.258	same	same	CORRECT	9	94	-1	contour083	Intermediate	0	0
107	0.999	diff	diff	CORRECT	9	94	-1	contour017	Song	3.16	3.16
50	1.806	same	same	CORRECT	9	94	-1	contour076	Song	0	0
98	0.659	same	diff	INCORRECT	9	94	-1	contour083	Song	2.92	2.92
93	1.307	same	same	CORRECT	9	94	-1	contour047	Speech	0	0
25	1.385	same	same	CORRECT	9	94	-1	contour171	Intermediate	0	0
16	1.211	same	same	CORRECT	9	94	-1	contour178	Intermediate	0	0
117	1.349	same	diff	INCORRECT	9	94	-1	contour146	Speech	2.27	2.27
90	1.077	same	same	CORRECT	9	94	-1	contour163	Speech	0	0
29	0.979	same	diff	INCORRECT	9	94	-1	contour148	Song	1.35	1.35
86	1.493	same	diff	INCORRECT	9	94	-1	contour068	Song	2.92	2.92
71	0.94	same	diff	INCORRECT	9	94	-1	contour174	Song	-1.58	1.58
60	1.745	same	same	CORRECT	9	94	-1	contour046	Speech	0	0
92	5.559	same	diff	INCORRECT	9	94	-1	contour163	Song	1.59	1.59
8	1.439	same	diff	INCORRECT	9	94	-1	contour075	Song	-4.96	4.96
53	1.87	same	same	CORRECT	9	94	-1	contour073	Song	0	0
48	1.795	same	same	CORRECT	9	94	-1	contour076	Speech	0	0
7	1.169	same	diff	INCORRECT	9	94	-1	contour075	Intermediate	-5.39	5.39
59	1.198	same	same	CORRECT	9	94	-1	contour072	Song	0	0
102	1.294	same	diff	INCORRECT	9	94	-1	contour130	Speech	-1.97	1.97
94	1.349	same	diff	INCORRECT	9	94	-1	contour047	Intermediate	2.82	2.82
22	1.674	same	diff	INCORRECT	9	94	-1	contour179	Intermediate	-2.56	2.56
106	1.956	same	diff	INCORRECT	9	94	-1	contour017	Intermediate	-3.27	3.27
18	1.411	same	same	CORRECT	9	94	-1	contour064	Speech	0	0
76	1.915	same	diff	INCORRECT	9	94	-1	contour139	Intermediate	0	0
75	2.039	same	same	CORRECT	9	94	-1	contour139	Speech	0	0
79	1.806	same	same	CORRECT	9	94	-1	contour151	Intermediate	0	0
68	2.124	diff	same	INCORRECT	9	94	-1	contour106	Song	0	0
111	1.349	same	same	CORRECT	9	94	-1	contour136	Speech	0	0
42	1.563	diff	diff	CORRECT	10	41	-0.666667	contour009	Speech	-3.32	3.32
111	5.237	same	same	CORRECT	10	41	-0.666667	contour136	Speech	0	0
44	0.858	same	same	CORRECT	10	41	-0.666667	contour009	Song	0	0
73	2.34	same	diff	INCORRECT	10	41	-0.666667	contour109	Intermediate	-1.65	1.65
14	1.723	same	diff	INCORRECT	10	41	-0.666667	contour003	Song	-1.6	1.6
113	1.833	diff	diff	CORRECT	10	41	-0.666667	contour136	Song	-1.35	1.35
85	1.506	same	same	CORRECT	10	41	-0.666667	contour068	Intermediate	0	0
84	2.45	same	same	CORRECT	10	41	-0.666667	contour068	Speech	0	0
89	2.408	same	same	CORRECT	10	41	-0.666667	contour135	Song	0	0
19	2.658	diff	same	INCORRECT	10	41	-0.666667	contour064	Intermediate	0	0
49	1.399	same	same	CORRECT	10	41	-0.666667	contour076	Intermediate	0	0
59	1.578	diff	same	INCORRECT	10	41	-0.666667	contour072	Song	0	0
97	8.054	diff	same	INCORRECT	10	41	-0.666667	contour083	Intermediate	0	0
117	1.233	same	diff	INCORRECT	10	41	-0.666667	contour146	Speech	2.27	2.27
47	2.12	same	same	CORRECT	10	41	-0.666667	contour044	Song	0	0
15	1.53	diff	same	INCORRECT	10	41	-0.666667	contour178	Speech	0	0
94	3.579	same	diff	INCORRECT	10	41	-0.666667	contour047	Intermediate	2.82	2.82
90	1.334	diff	same	INCORRECT	10	41	-0.666667	contour163	Speech	0	0
76	1.878	same	diff	INCORRECT	10	41	-0.666667	contour139	Intermediate	0	0
103	3.279	same	diff	INCORRECT	10	41	-0.666667	contour130	Intermediate	1.39	1.39
43	1.658	same	diff	INCORRECT	10	41	-0.666667	contour009	Intermediate	-2.34	2.34
93	1.162	same	same	CORRECT	10	41	-0.666667	contour047	Speech	0	0
33	2.839	same	same	CORRECT	10	41	-0.666667	contour103	Speech	0	0
114	2.028	same	diff	INCORRECT	10	41	-0.666667	contour164	Speech	-2.08	2.08
32	1.27	diff	same	INCORRECT	10	41	-0.666667	contour036	Song	0	0
41	1.333	same	same	CORRECT	10	41	-0.666667	contour071	Song	0	0
20	1.161	same	diff	INCORRECT	10	41	-0.666667	contour064	Song	-1.33	1.33
28	3.436	same	diff	INCORRECT	10	41	-0.666667	contour148	Intermediate	2.29	2.29
30	1.394	diff	same	INCORRECT	10	41	-0.666667	contour036	Speech	0	0
100	2.777	same	same	CORRECT	10	41	-0.666667	contour107	Intermediate	0	0
50	1.571	same	same	CORRECT	10	41	-0.666667	contour076	Song	0	0
112	1.311	diff	diff	CORRECT	10	41	-0.666667	contour136	Intermediate	-3.21	3.21
102	2.784	diff	diff	CORRECT	10	41	-0.666667	contour130	Speech	-1.97	1.97
98	1.266	same	diff	INCORRECT	10	41	-0.666667	contour083	Song	2.92	2.92
8	1.552	same	diff	INCORRECT	10	41	-0.666667	contour075	Song	-4.96	4.96
63	3.695	same	same	CORRECT	10	41	-0.666667	contour027	Speech	0	0
11	2.916	same	diff	INCORRECT	10	41	-0.666667	contour012	Song	-1.34	1.34
118	1.371	same	diff	INCORRECT	10	41	-0.666667	contour146	Intermediate	-2.82	2.82
56	1.844	diff	same	INCORRECT	10	41	-0.666667	contour059	Song	0	0
69	1.723	same	diff	INCORRECT	10	41	-0.666667	contour174	Speech	-2.18	2.18
107	4.398	diff	diff	CORRECT	10	41	-0.666667	contour017	Song	3.16	3.16
9	1.607	same	same	CORRECT	10	41	-0.666667	contour012	Speech	0	0
51	2.395	diff	same	INCORRECT	10	41	-0.666667	contour073	Speech	0	0
29	1.583	same	diff	INCORRECT	10	41	-0.666667	contour148	Song	1.35	1.35
75	1.364	diff	same	INCORRECT	10	41	-0.666667	contour139	Speech	0	0
81	1.807	same	diff	INCORRECT	10	41	-0.666667	contour057	Speech	-2.74	2.74
80	1.556	same	diff	INCORRECT	10	41	-0.666667	contour151	Song	2.92	2.92
54	1.941	same	diff	INCORRECT	10	41	-0.666667	contour059	Speech	-1.76	1.76
86	1.126	same	diff	INCORRECT	10	41	-0.666667	contour068	Song	2.92	2.92
68	1.632	same	same	CORRECT	10	41	-0.666667	contour106	Song	0	0
53	2.703	same	same	CORRECT	10	41	-0.666667	contour073	Song	0	0
27	2.224	same	same	CORRECT	10	41	-0.666667	contour148	Speech	0	0
25	1.695	diff	same	INCORRECT	10	41	-0.666667	contour171	Intermediate	0	0
72	3.252	diff	same	INCORRECT	10	41	-0.666667	contour109	Speech	0	0
36	2.126	same	same	CORRECT	10	41	-0.666667	contour037	Speech	0	0
65	1.481	diff	diff	CORRECT	10	41	-0.666667	contour027	Song	2.92	2.92
77	1.509	same	diff	INCORRECT	10	41	-0.666667	contour139	Song	-1.34	1.34
62	1.425	same	diff	INCORRECT	10	41	-0.666667	contour046	Song	-1.75	1.75
37	4.335	diff	same	INCORRECT	10	41	-0.666667	contour037	Intermediate	0	0
16	2.426	same	same	CORRECT	10	41	-0.666667	contour178	Intermediate	0	0
88	1.442	same	diff	INCORRECT	10	41	-0.666667	contour135	Intermediate	-2.57	2.57
101	1.338	same	diff	INCORRECT	10	41	-0.666667	contour107	Song	2.7	2.7
38	2.271	same	same	CORRECT	10	41	-0.666667	contour037	Song	0	0
5	0.985	same	same	CORRECT	10	41	-0.666667	contour070	Song	0	0
24	1.045	same	same	CORRECT	10	41	-0.666667	contour171	Speech	0	0
67	3.7	diff	diff	CORRECT	10	41	-0.666667	contour106	Intermediate	1.95	1.95
13	1.205	same	same	CORRECT	10	41	-0.666667	contour003	Intermediate	0	0
18	1.645	same	same	CORRECT	10	41	-0.666667	contour064	Speech	0	0
22	1.549	same	diff	INCORRECT	10	41	-0.666667	contour179	Intermediate	-2.56	2.56
71	2.532	diff	diff	CORRECT	10	41	-0.666667	contour174	Song	-1.58	1.58
17	1.158	same	diff	INCORRECT	10	41	-0.666667	contour178	Song	-1.61	1.61
119	1.076	same	diff	INCORRECT	10	41	-0.666667	contour146	Song	-1.47	1.47
35	1.833	same	diff	INCORRECT	10	41	-0.666667	contour103	Song	8.4	8.4
40	1.757	diff	diff	CORRECT	10	41	-0.666667	contour071	Intermediate	2.2	2.2
83	3.414	diff	same	INCORRECT	10	41	-0.666667	contour057	Song	0	0
96	1.428	same	diff	INCORRECT	10	41	-0.666667	contour083	Speech	-2.16	2.16
99	1.341	same	same	CORRECT	10	41	-0.666667	contour107	Speech	0	0
0	2.891	same	diff	INCORRECT	10	41	-0.666667	contour185	Speech	-1.82	1.82
23	1.54	same	diff	INCORRECT	10	41	-0.666667	contour179	Song	3.16	3.16
26	1.101	same	diff	INCORRECT	10	41	-0.666667	contour171	Song	-1.6	1.6
3	2.693	diff	same	INCORRECT	10	41	-0.666667	contour070	Speech	0	0
55	1.633	diff	same	INCORRECT	10	41	-0.666667	contour059	Intermediate	0	0
31	1.251	same	diff	INCORRECT	10	41	-0.666667	contour036	Intermediate	0	0
116	1.225	same	same	CORRECT	10	41	-0.666667	contour164	Song	0	0
87	1.394	same	same	CORRECT	10	41	-0.666667	contour135	Speech	0	0
104	1.441	diff	same	INCORRECT	10	41	-0.666667	contour130	Song	0	0
21	1.22	same	diff	INCORRECT	10	41	-0.666667	contour179	Speech	-3.71	3.71
115	0.97	same	diff	INCORRECT	10	41	-0.666667	contour164	Intermediate	1.43	1.43
48	1.395	same	same	CORRECT	10	41	-0.666667	contour076	Speech	0	0
60	1.493	same	same	CORRECT	10	41	-0.666667	contour046	Speech	0	0
110	2.297	same	diff	INCORRECT	10	41	-0.666667	contour156	Song	-1.46	1.46
66	1.226	same	same	CORRECT	10	41	-0.666667	contour106	Speech	0	0
61	2.434	same	diff	INCORRECT	10	41	-0.666667	contour046	Intermediate	-2.59	2.59
95	1.189	same	diff	INCORRECT	10	41	-0.666667	contour047	Song	-1.46	1.46
52	1.546	diff	same	INCORRECT	10	41	-0.666667	contour073	Intermediate	0	0
12	1.6	same	diff	INCORRECT	10	41	-0.666667	contour003	Speech	-2.75	2.75
58	1.708	diff	same	INCORRECT	10	41	-0.666667	contour072	Intermediate	0	0
2	2.11	same	same	CORRECT	10	41	-0.666667	contour185	Song	0	0
34	1.25	same	same	CORRECT	10	41	-0.666667	contour103	Intermediate	0	0
39	1.361	diff	same	INCORRECT	10	41	-0.666667	contour071	Speech	0	0
106	3.08	same	diff	INCORRECT	10	41	-0.666667	contour017	Intermediate	-3.27	3.27
79	2.146	same	same	CORRECT	10	41	-0.666667	contour151	Intermediate	0	0
1	1.07	same	same	CORRECT	10	41	-0.666667	contour185	Intermediate	0	0
82	0.963	diff	same	INCORRECT	10	41	-0.666667	contour057	Intermediate	0	0
105	2.179	same	diff	INCORRECT	10	41	-0.666667	contour017	Speech	2.36	2.36
4	0.933	diff	diff	CORRECT	10	41	-0.666667	contour070	Intermediate	1.01	1.01
92	1.226	diff	diff	CORRECT	10	41	-0.666667	contour163	Song	1.59	1.59
57	3.71	diff	same	INCORRECT	10	41	-0.666667	contour072	Speech	0	0
108	0.919	same	same	CORRECT	10	41	-0.666667	contour156	Speech	0	0
74	1.615	diff	diff	CORRECT	10	41	-0.666667	contour109	Song	2.71	2.71
91	1.116	same	same	CORRECT	10	41	-0.666667	contour163	Intermediate	0	0
45	1.028	same	diff	INCORRECT	10	41	-0.666667	contour044	Speech	0	0
109	1.004	same	diff	INCORRECT	10	41	-0.666667	contour156	Intermediate	0	0
78	4.12	same	diff	INCORRECT	10	41	-0.666667	contour151	Speech	-2.29	2.29
7	2.147	diff	diff	CORRECT	10	41	-0.666667	contour075	Intermediate	-5.39	5.39
70	1.525	same	diff	INCORRECT	10	41	-0.666667	contour174	Intermediate	1.41	1.41
64	2.564	diff	diff	CORRECT	10	41	-0.666667	contour027	Intermediate	-2.84	2.84
10	1.363	same	same	CORRECT	10	41	-0.666667	contour012	Intermediate	0	0
46	1.192	same	same	CORRECT	10	41	-0.666667	contour044	Intermediate	0	0
6	3.983	same	diff	INCORRECT	10	41	-0.666667	contour075	Speech	2.67	2.67
111	2.125	same	same	CORRECT	11	30	-0.666667	contour136	Speech	0	0
103	2.137	same	diff	INCORRECT	11	30	-0.666667	contour130	Intermediate	1.39	1.39
43	2.122	diff	diff	CORRECT	11	30	-0.666667	contour009	Intermediate	-2.34	2.34
96	2.433	same	diff	INCORRECT	11	30	-0.666667	contour083	Speech	-2.16	2.16
14	6.981	same	diff	INCORRECT	11	30	-0.666667	contour003	Song	-1.6	1.6
39	5.194	same	same	CORRECT	11	30	-0.666667	contour071	Speech	0	0
68	1.759	same	same	CORRECT	11	30	-0.666667	contour106	Song	0	0
50	2.35	same	same	CORRECT	11	30	-0.666667	contour076	Song	0	0
64	2.52	diff	diff	CORRECT	11	30	-0.666667	contour027	Intermediate	-2.84	2.84
102	2.518	diff	diff	CORRECT	11	30	-0.666667	contour130	Speech	-1.97	1.97
65	1.417	diff	diff	CORRECT	11	30	-0.666667	contour027	Song	2.92	2.92
56	2.48	same	same	CORRECT	11	30	-0.666667	contour059	Song	0	0
13	1.387	same	same	CORRECT	11	30	-0.666667	contour003	Intermediate	0	0
90	2.198	diff	same	INCORRECT	11	30	-0.666667	contour163	Speech	0	0
35	1.673	same	diff	INCORRECT	11	30	-0.666667	contour103	Song	8.4	8.4
55	2.449	same	same	CORRECT	11	30	-0.666667	contour059	Intermediate	0	0
87	3.083	diff	same	INCORRECT	11	30	-0.666667	contour135	Speech	0	0
38	1.85	same	same	CORRECT	11	30	-0.666667	contour037	Song	0	0
77	1.518	diff	diff	CORRECT	11	30	-0.666667	contour139	Song	-1.34	1.34
23	1.552	diff	diff	CORRECT	11	30	-0.666667	contour179	Song	3.16	3.16
36	2.278	diff	same	INCORRECT	11	30	-0.666667	contour037	Speech	0	0
105	2.986	diff	diff	CORRECT	11	30	-0.666667	contour017	Speech	2.36	2.36
85	1.374	same	same	CORRECT	11	30	-0.666667	contour068	Intermediate	0	0
99	1.171	same	same	CORRECT	11	30	-0.666667	contour107	Speech	0	0
4	1.701	same	diff	INCORRECT	11	30	-0.666667	contour070	Intermediate	1.01	1.01
12	1.933	same	diff	INCORRECT	11	30	-0.666667	contour003	Speech	-2.75	2.75
6	1.609	diff	diff	CORRECT	11	30	-0.666667	contour075	Speech	2.67	2.67
26	1.67	same	diff	INCORRECT	11	30	-0.666667	contour171	Song	-1.6	1.6
9	2.875	diff	same	INCORRECT	11	30	-0.666667	contour012	Speech	0	0
59	6.017	same	same	CORRECT	11	30	-0.666667	contour072	Song	0	0
67	7.28	same	diff	INCORRECT	11	30	-0.666667	contour106	Intermediate	1.95	1.95
115	1.4	diff	diff	CORRECT	11	30	-0.666667	contour164	Intermediate	1.43	1.43
93	3.097	same	same	CORRECT	11	30	-0.666667	contour047	Speech	0	0
15	1.392	diff	same	INCORRECT	11	30	-0.666667	contour178	Speech	0	0
91	1.192	same	same	CORRECT	11	30	-0.666667	contour163	Intermediate	0	0
51	1.991	same	same	CORRECT	11	30	-0.666667	contour073	Speech	0	0
44	1.229	same	same	CORRECT	11	30	-0.666667	contour009	Song	0	0
17	2.17	same	diff	INCORRECT	11	30	-0.666667	contour178	Song	-1.61	1.61
79	1.336	same	same	CORRECT	11	30	-0.666667	contour151	Intermediate	0	0
37	2.475	diff	same	INCORRECT	11	30	-0.666667	contour037	Intermediate	0	0
92	1.917	diff	diff	CORRECT	11	30	-0.666667	contour163	Song	1.59	1.59
42	1.692	same	diff	INCORRECT	11	30	-0.666667	contour009	Speech	-3.32	3.32
53	1.664	same	same	CORRECT	11	30	-0.666667	contour073	Song	0	0
113	2.17	same	diff	INCORRECT	11	30	-0.666667	contour136	Song	-1.35	1.35
40	1.584	same	diff	INCORRECT	11	30	-0.666667	contour071	Intermediate	2.2	2.2
114	1.042	diff	diff	CORRECT	11	30	-0.666667	contour164	Speech	-2.08	2.08
74	1.235	same	diff	INCORRECT	11	30	-0.666667	contour109	Song	2.71	2.71
29	1.947	same	diff	INCORRECT	11	30	-0.666667	contour148	Song	1.35	1.35
54	1.234	diff	diff	CORRECT	11	30	-0.666667	contour059	Speech	-1.76	1.76
71	6.387	same	diff	INCORRECT	11	30	-0.666667	contour174	Song	-1.58	1.58
118	2.99	diff	diff	CORRECT	11	30	-0.666667	contour146	Intermediate	-2.82	2.82
22	1.381	same	diff	INCORRECT	11	30	-0.666667	contour179	Intermediate	-2.56	2.56
33	1.315	diff	same	INCORRECT	11	30	-0.666667	contour103	Speech	0	0
11	1.956	diff	diff	CORRECT	11	30	-0.666667	contour012	Song	-1.34	1.34
76	1.418	same	diff	INCORRECT	11	30	-0.666667	contour139	Intermediate	0	0
109	1.614	same	diff	INCORRECT	11	30	-0.666667	contour156	Intermediate	0	0
117	0.937	diff	diff	CORRECT	11	30	-0.666667	contour146	Speech	2.27	2.27
30	1.628	same	same	CORRECT	11	30	-0.666667	contour036	Speech	0	0
107	2.536	diff	diff	CORRECT	11	30	-0.666667	contour017	Song	3.16	3.16
84	1.328	same	same	CORRECT	11	30	-0.666667	contour068	Speech	0	0
97	1.653	same	same	CORRECT	11	30	-0.666667	contour083	Intermediate	0	0
63	1.976	diff	same	INCORRECT	11	30	-0.666667	contour027	Speech	0	0
66	1.952	same	same	CORRECT	11	30	-0.666667	contour106	Speech	0	0
19	1.646	same	same	CORRECT	11	30	-0.666667	contour064	Intermediate	0	0
112	2.2	diff	diff	CORRECT	11	30	-0.666667	contour136	Intermediate	-3.21	3.21
58	1.262	same	same	CORRECT	11	30	-0.666667	contour072	Intermediate	0	0
52	1.353	diff	same	INCORRECT	11	30	-0.666667	contour073	Intermediate	0	0
45	1.199	same	diff	INCORRECT	11	30	-0.666667	contour044	Speech	0	0
61	1.444	diff	diff	CORRECT	11	30	-0.666667	contour046	Intermediate	-2.59	2.59
95	1.191	same	diff	INCORRECT	11	30	-0.666667	contour047	Song	-1.46	1.46
60	1.239	same	same	CORRECT	11	30	-0.666667	contour046	Speech	0	0
119	3.825	same	diff	INCORRECT	11	30	-0.666667	contour146	Song	-1.47	1.47
81	2.481	diff	diff	CORRECT	11	30	-0.666667	contour057	Speech	-2.74	2.74
104	1.134	diff	same	INCORRECT	11	30	-0.666667	contour130	Song	0	0
31	1.486	diff	diff	CORRECT	11	30	-0.666667	contour036	Intermediate	0	0
5	1.32	diff	same	INCORRECT	11	30	-0.666667	contour070	Song	0	0
41	0.783	same	same	CORRECT	11	30	-0.666667	contour071	Song	0	0
106	1.47	diff	diff	CORRECT	11	30	-0.666667	contour017	Intermediate	-3.27	3.27
75	1.851	same	same	CORRECT	11	30	-0.666667	contour139	Speech	0	0
16	1.554	same	same	CORRECT	11	30	-0.666667	contour178	Intermediate	0	0
108	1.192	same	same	CORRECT	11	30	-0.666667	contour156	Speech	0	0
72	2.766	diff	same	INCORRECT	11	30	-0.666667	contour109	Speech	0	0
7	2.381	diff	diff	CORRECT	11	30	-0.666667	contour075	Intermediate	-5.39	5.39
89	1.555	same	same	CORRECT	11	30	-0.666667	contour135	Song	0	0
25	1.797	same	same	CORRECT	11	30	-0.666667	contour171	Intermediate	0	0
47	1.336	diff	same	INCORRECT	11	30	-0.666667	contour044	Song	0	0
49	1.172	same	same	CORRECT	11	30	-0.666667	contour076	Intermediate	0	0
34	3.582	same	same	CORRECT	11	30	-0.666667	contour103	Intermediate	0	0
73	1.281	same	diff	INCORRECT	11	30	-0.666667	contour109	Intermediate	-1.65	1.65
10	1.555	same	same	CORRECT	11	30	-0.666667	contour012	Intermediate	0	0
0	1.367	diff	diff	CORRECT	11	30	-0.666667	contour185	Speech	-1.82	1.82
27	1.221	diff	same	INCORRECT	11	30	-0.666667	contour148	Speech	0	0
3	1.177	same	same	CORRECT	11	30	-0.666667	contour070	Speech	0	0
78	1.155	diff	diff	CORRECT	11	30	-0.666667	contour151	Speech	-2.29	2.29
83	1.783	same	same	CORRECT	11	30	-0.666667	contour057	Song	0	0
20	1.464	diff	diff	CORRECT	11	30	-0.666667	contour064	Song	-1.33	1.33
1	2.291	same	same	CORRECT	11	30	-0.666667	contour185	Intermediate	0	0
101	1.512	same	diff	INCORRECT	11	30	-0.666667	contour107	Song	2.7	2.7
82	1.318	diff	same	INCORRECT	11	30	-0.666667	contour057	Intermediate	0	0
116	1.366	same	same	CORRECT	11	30	-0.666667	contour164	Song	0	0
100	0.968	same	same	CORRECT	11	30	-0.666667	contour107	Intermediate	0	0
48	1.044	same	same	CORRECT	11	30	-0.666667	contour076	Speech	0	0
28	1.504	same	diff	INCORRECT	11	30	-0.666667	contour148	Intermediate	2.29	2.29
57	2.591	same	same	CORRECT	11	30	-0.666667	contour072	Speech	0	0
94	1.991	same	diff	INCORRECT	11	30	-0.666667	contour047	Intermediate	2.82	2.82
21	1.767	same	diff	INCORRECT	11	30	-0.666667	contour179	Speech	-3.71	3.71
62	1.304	diff	diff	CORRECT	11	30	-0.666667	contour046	Song	-1.75	1.75
98	2.631	diff	diff	CORRECT	11	30	-0.666667	contour083	Song	2.92	2.92
2	1.395	same	same	CORRECT	11	30	-0.666667	contour185	Song	0	0
80	0.86	same	diff	INCORRECT	11	30	-0.666667	contour151	Song	2.92	2.92
88	1.522	diff	diff	CORRECT	11	30	-0.666667	contour135	Intermediate	-2.57	2.57
86	1.956	same	diff	INCORRECT	11	30	-0.666667	contour068	Song	2.92	2.92
24	1.158	same	same	CORRECT	11	30	-0.666667	contour171	Speech	0	0
69	1.539	diff	diff	CORRECT	11	30	-0.666667	contour174	Speech	-2.18	2.18
18	2.038	same	same	CORRECT	11	30	-0.666667	contour064	Speech	0	0
110	1.679	same	diff	INCORRECT	11	30	-0.666667	contour156	Song	-1.46	1.46
46	1.494	same	same	CORRECT	11	30	-0.666667	contour044	Intermediate	0	0
32	1.721	same	same	CORRECT	11	30	-0.666667	contour036	Song	0	0
8	0.989	diff	diff	CORRECT	11	30	-0.666667	contour075	Song	-4.96	4.96
70	2.835	same	diff	INCORRECT	11	30	-0.666667	contour174	Intermediate	1.41	1.41
89	1.151	same	same	CORRECT	12	77	0	contour135	Song	0	0
45	2.687	same	diff	INCORRECT	12	77	0	contour044	Speech	0	0
20	1.668	same	diff	INCORRECT	12	77	0	contour064	Song	-1.33	1.33
75	1.137	same	same	CORRECT	12	77	0	contour139	Speech	0	0
98	3.74	diff	diff	CORRECT	12	77	0	contour083	Song	2.92	2.92
81	1.207	diff	diff	CORRECT	12	77	0	contour057	Speech	-2.74	2.74
22	1.361	diff	diff	CORRECT	12	77	0	contour179	Intermediate	-2.56	2.56
29	1.184	diff	diff	CORRECT	12	77	0	contour148	Song	1.35	1.35
62	1.304	same	diff	INCORRECT	12	77	0	contour046	Song	-1.75	1.75
109	1.068	same	diff	INCORRECT	12	77	0	contour156	Intermediate	0	0
65	3.56	same	diff	INCORRECT	12	77	0	contour027	Song	2.92	2.92
28	0.991	same	diff	INCORRECT	12	77	0	contour148	Intermediate	2.29	2.29
26	1.324	same	diff	INCORRECT	12	77	0	contour171	Song	-1.6	1.6
73	1.24	diff	diff	CORRECT	12	77	0	contour109	Intermediate	-1.65	1.65
114	2.672	same	diff	INCORRECT	12	77	0	contour164	Speech	-2.08	2.08
119	1.436	same	diff	INCORRECT	12	77	0	contour146	Song	-1.47	1.47
94	5.062	same	diff	INCORRECT	12	77	0	contour047	Intermediate	2.82	2.82
2	0.865	same	same	CORRECT	12	77	0	contour185	Song	0	0
14	0.931	same	diff	INCORRECT	12	77	0	contour003	Song	-1.6	1.6
104	1.663	same	same	CORRECT	12	77	0	contour130	Song	0	0
78	1.541	same	diff	INCORRECT	12	77	0	contour151	Speech	-2.29	2.29
13	1.617	same	same	CORRECT	12	77	0	contour003	Intermediate	0	0
40	1.866	same	diff	INCORRECT	12	77	0	contour071	Intermediate	2.2	2.2
79	1.441	same	same	CORRECT	12	77	0	contour151	Intermediate	0	0
24	0.835	same	same	CORRECT	12	77	0	contour171	Speech	0	0
100	0.767	same	same	CORRECT	12	77	0	contour107	Intermediate	0	0
74	1.763	same	diff	INCORRECT	12	77	0	contour109	Song	2.71	2.71
69	3.407	same	diff	INCORRECT	12	77	0	contour174	Speech	-2.18	2.18
53	1.574	same	same	CORRECT	12	77	0	contour073	Song	0	0
63	2.881	same	same	CORRECT	12	77	0	contour027	Speech	0	0
49	1.075	same	same	CORRECT	12	77	0	contour076	Intermediate	0	0
68	0.981	same	same	CORRECT	12	77	0	contour106	Song	0	0
101	2.133	same	diff	INCORRECT	12	77	0	contour107	Song	2.7	2.7
95	1.387	same	diff	INCORRECT	12	77	0	contour047	Song	-1.46	1.46
25	1.184	same	same	CORRECT	12	77	0	contour171	Intermediate	0	0
118	1.255	same	diff	INCORRECT	12	77	0	contour146	Intermediate	-2.82	2.82
35	1.028	same	diff	INCORRECT	12	77	0	contour103	Song	8.4	8.4
66	1.484	same	same	CORRECT	12	77	0	contour106	Speech	0	0
111	2.983	same	same	CORRECT	12	77	0	contour136	Speech	0	0
19	3.995	same	same	CORRECT	12	77	0	contour064	Intermediate	0	0
21	2.816	same	diff	INCORRECT	12	77	0	contour179	Speech	-3.71	3.71
41	1.026	same	same	CORRECT	12	77	0	contour071	Song	0	0
23	3.79	same	diff	INCORRECT	12	77	0	contour179	Song	3.16	3.16
90	1.513	same	same	CORRECT	12	77	0	contour163	Speech	0	0
42	3.167	same	diff	INCORRECT	12	77	0	contour009	Speech	-3.32	3.32
37	1.432	same	same	CORRECT	12	77	0	contour037	Intermediate	0	0
87	1.932	same	same	CORRECT	12	77	0	contour135	Speech	0	0
99	1.658	same	same	CORRECT	12	77	0	contour107	Speech	0	0
80	0.856	diff	diff	CORRECT	12	77	0	contour151	Song	2.92	2.92
77	1.233	same	diff	INCORRECT	12	77	0	contour139	Song	-1.34	1.34
88	1.89	same	diff	INCORRECT	12	77	0	contour135	Intermediate	-2.57	2.57
16	1.367	same	same	CORRECT	12	77	0	contour178	Intermediate	0	0
30	1.803	same	same	CORRECT	12	77	0	contour036	Speech	0	0
54	3.341	same	diff	INCORRECT	12	77	0	contour059	Speech	-1.76	1.76
38	1.109	same	same	CORRECT	12	77	0	contour037	Song	0	0
17	2.732	same	diff	INCORRECT	12	77	0	contour178	Song	-1.61	1.61
103	1.784	same	diff	INCORRECT	12	77	0	contour130	Intermediate	1.39	1.39
51	3.234	diff	same	INCORRECT	12	77	0	contour073	Speech	0	0
105	2.873	diff	diff	CORRECT	12	77	0	contour017	Speech	2.36	2.36
91	2.215	same	same	CORRECT	12	77	0	contour163	Intermediate	0	0
3	3.565	same	same	CORRECT	12	77	0	contour070	Speech	0	0
6	1.19	diff	diff	CORRECT	12	77	0	contour075	Speech	2.67	2.67
70	1.147	same	diff	INCORRECT	12	77	0	contour174	Intermediate	1.41	1.41
47	4.809	same	same	CORRECT	12	77	0	contour044	Song	0	0
44	1.339	same	same	CORRECT	12	77	0	contour009	Song	0	0
76	4.427	same	diff	INCORRECT	12	77	0	contour139	Intermediate	0	0
106	1.267	diff	diff	CORRECT	12	77	0	contour017	Intermediate	-3.27	3.27
50	1.283	same	same	CORRECT	12	77	0	contour076	Song	0	0
96	1.124	same	diff	INCORRECT	12	77	0	contour083	Speech	-2.16	2.16
34	1.307	same	same	CORRECT	12	77	0	contour103	Intermediate	0	0
108	1.823	same	same	CORRECT	12	77	0	contour156	Speech	0	0
18	3.941	same	same	CORRECT	12	77	0	contour064	Speech	0	0
31	1.693	same	diff	INCORRECT	12	77	0	contour036	Intermediate	0	0
85	2.677	same	same	CORRECT	12	77	0	contour068	Intermediate	0	0
57	1.123	same	same	CORRECT	12	77	0	contour072	Speech	0	0
61	1.611	same	diff	INCORRECT	12	77	0	contour046	Intermediate	-2.59	2.59
15	1.573	same	same	CORRECT	12	77	0	contour178	Speech	0	0
59	3.8	same	same	CORRECT	12	77	0	contour072	Song	0	0
97	1.398	same	same	CORRECT	12	77	0	contour083	Intermediate	0	0
48	1.296	same	same	CORRECT	12	77	0	contour076	Speech	0	0
113	3.547	diff	diff	CORRECT	12	77	0	contour136	Song	-1.35	1.35
92	1.291	same	diff	INCORRECT	12	77	0	contour163	Song	1.59	1.59
39	0.651	same	same	CORRECT	12	77	0	contour071	Speech	0	0
110	0.735	same	diff	INCORRECT	12	77	0	contour156	Song	-1.46	1.46
71	0.677	diff	diff	CORRECT	12	77	0	contour174	Song	-1.58	1.58
72	1.194	same	same	CORRECT	12	77	0	contour109	Speech	0	0
7	1.898	diff	diff	CORRECT	12	77	0	contour075	Intermediate	-5.39	5.39
11	3.16	same	diff	INCORRECT	12	77	0	contour012	Song	-1.34	1.34
10	0.982	same	same	CORRECT	12	77	0	contour012	Intermediate	0	0
32	0.998	diff	same	INCORRECT	12	77	0	contour036	Song	0	0
55	1.194	same	same	CORRECT	12	77	0	contour059	Intermediate	0	0
60	1.698	same	same	CORRECT	12	77	0	contour046	Speech	0	0
5	1.101	same	same	CORRECT	12	77	0	contour070	Song	0	0
27	1.104	same	same	CORRECT	12	77	0	contour148	Speech	0	0
9	0.772	same	same	CORRECT	12	77	0	contour012	Speech	0	0
4	1.54	same	diff	INCORRECT	12	77	0	contour070	Intermediate	1.01	1.01
115	0.728	same	diff	INCORRECT	12	77	0	contour164	Intermediate	1.43	1.43
83	1.255	same	same	CORRECT	12	77	0	contour057	Song	0	0
67	1.756	same	diff	INCORRECT	12	77	0	contour106	Intermediate	1.95	1.95
82	1.673	same	same	CORRECT	12	77	0	contour057	Intermediate	0	0
102	2.355	same	diff	INCORRECT	12	77	0	contour130	Speech	-1.97	1.97
0	1.086	same	diff	INCORRECT	12	77	0	contour185	Speech	-1.82	1.82
107	1.05	same	diff	INCORRECT	12	77	0	contour017	Song	3.16	3.16
64	1.13	diff	diff	CORRECT	12	77	0	contour027	Intermediate	-2.84	2.84
86	1.075	same	diff	INCORRECT	12	77	0	contour068	Song	2.92	2.92
43	1.507	same	diff	INCORRECT	12	77	0	contour009	Intermediate	-2.34	2.34
84	1.067	same	same	CORRECT	12	77	0	contour068	Speech	0	0
1	0.709	same	same	CORRECT	12	77	0	contour185	Intermediate	0	0
52	0.971	same	same	CORRECT	12	77	0	contour073	Intermediate	0	0
116	1.318	same	same	CORRECT	12	77	0	contour164	Song	0	0
112	1.111	same	diff	INCORRECT	12	77	0	contour136	Intermediate	-3.21	3.21
36	0.994	same	same	CORRECT	12	77	0	contour037	Speech	0	0
46	1.255	same	same	CORRECT	12	77	0	contour044	Intermediate	0	0
12	1.002	same	diff	INCORRECT	12	77	0	contour003	Speech	-2.75	2.75
58	1.076	same	same	CORRECT	12	77	0	contour072	Intermediate	0	0
8	0.845	same	diff	INCORRECT	12	77	0	contour075	Song	-4.96	4.96
33	1.169	same	same	CORRECT	12	77	0	contour103	Speech	0	0
93	0.885	same	same	CORRECT	12	77	0	contour047	Speech	0	0
56	1.465	same	same	CORRECT	12	77	0	contour059	Song	0	0
117	1.368	same	diff	INCORRECT	12	77	0	contour146	Speech	2.27	2.27
112	1.502	diff	diff	CORRECT	13	95	-1	contour136	Intermediate	-3.21	3.21
39	1.372	same	same	CORRECT	13	95	-1	contour071	Speech	0	0
38	1.058	diff	same	INCORRECT	13	95	-1	contour037	Song	0	0
4	0.993	same	diff	INCORRECT	13	95	-1	contour070	Intermediate	1.01	1.01
10	1.183	same	same	CORRECT	13	95	-1	contour012	Intermediate	0	0
0	1.207	same	diff	INCORRECT	13	95	-1	contour185	Speech	-1.82	1.82
74	1.59	same	diff	INCORRECT	13	95	-1	contour109	Song	2.71	2.71
2	1.231	same	same	CORRECT	13	95	-1	contour185	Song	0	0
85	1.6	same	same	CORRECT	13	95	-1	contour068	Intermediate	0	0
106	2.125	same	diff	INCORRECT	13	95	-1	contour017	Intermediate	-3.27	3.27
6	1.276	diff	diff	CORRECT	13	95	-1	contour075	Speech	2.67	2.67
90	1.775	same	same	CORRECT	13	95	-1	contour163	Speech	0	0
36	1.27	same	same	CORRECT	13	95	-1	contour037	Speech	0	0
83	2.669	diff	same	INCORRECT	13	95	-1	contour057	Song	0	0
54	1.539	same	diff	INCORRECT	13	95	-1	contour059	Speech	-1.76	1.76
42	1.437	diff	diff	CORRECT	13	95	-1	contour009	Speech	-3.32	3.32
23	3.072	diff	diff	CORRECT	13	95	-1	contour179	Song	3.16	3.16
108	0.597	diff	same	INCORRECT	13	95	-1	contour156	Speech	0	0
44	1.402	diff	same	INCORRECT	13	95	-1	contour009	Song	0	0
71	1.968	diff	diff	CORRECT	13	95	-1	contour174	Song	-1.58	1.58
98	0.947	diff	diff	CORRECT	13	95	-1	contour083	Song	2.92	2.92
93	1.315	same	same	CORRECT	13	95	-1	contour047	Speech	0	0
47	2.371	diff	same	INCORRECT	13	95	-1	contour044	Song	0	0
105	2.099	same	diff	INCORRECT	13	95	-1	contour017	Speech	2.36	2.36
18	3.847	diff	same	INCORRECT	13	95	-1	contour064	Speech	0	0
101	0.739	same	diff	INCORRECT	13	95	-1	contour107	Song	2.7	2.7
17	1.575	diff	diff	CORRECT	13	95	-1	contour178	Song	-1.61	1.61
16	0.988	same	same	CORRECT	13	95	-1	contour178	Intermediate	0	0
77	1.525	same	diff	INCORRECT	13	95	-1	contour139	Song	-1.34	1.34
110	1.227	same	diff	INCORRECT	13	95	-1	contour156	Song	-1.46	1.46
32	1.524	diff	same	INCORRECT	13	95	-1	contour036	Song	0	0
57	2.164	same	same	CORRECT	13	95	-1	contour072	Speech	0	0
95	1.44	diff	diff	CORRECT	13	95	-1	contour047	Song	-1.46	1.46
5	1.654	diff	same	INCORRECT	13	95	-1	contour070	Song	0	0
21	2.126	same	diff	INCORRECT	13	95	-1	contour179	Speech	-3.71	3.71
9	1.452	same	same	CORRECT	13	95	-1	contour012	Speech	0	0
73	0.925	same	diff	INCORRECT	13	95	-1	contour109	Intermediate	-1.65	1.65
60	1.225	same	same	CORRECT	13	95	-1	contour046	Speech	0	0
8	1.068	same	diff	INCORRECT	13	95	-1	contour075	Song	-4.96	4.96
28	1.209	same	diff	INCORRECT	13	95	-1	contour148	Intermediate	2.29	2.29
111	1.279	diff	same	INCORRECT	13	95	-1	contour136	Speech	0	0
20	2.596	diff	diff	CORRECT	13	95	-1	contour064	Song	-1.33	1.33
96	1.072	diff	diff	CORRECT	13	95	-1	contour083	Speech	-2.16	2.16
113	1.548	diff	diff	CORRECT	13	95	-1	contour136	Song	-1.35	1.35
33	1.629	diff	same	INCORRECT	13	95	-1	contour103	Speech	0	0
86	1.385	diff	diff	CORRECT	13	95	-1	contour068	Song	2.92	2.92
58	0.754	diff	same	INCORRECT	13	95	-1	contour072	Intermediate	0	0
26	0.894	same	diff	INCORRECT	13	95	-1	contour171	Song	-1.6	1.6
84	0.939	same	same	CORRECT	13	95	-1	contour068	Speech	0	0
41	0.74	same	same	CORRECT	13	95	-1	contour071	Song	0	0
117	0.704	diff	diff	CORRECT	13	95	-1	contour146	Speech	2.27	2.27
12	1.448	same	diff	INCORRECT	13	95	-1	contour003	Speech	-2.75	2.75
31	4.024	same	diff	INCORRECT	13	95	-1	contour036	Intermediate	0	0
48	1.713	same	same	CORRECT	13	95	-1	contour076	Speech	0	0
65	0.941	diff	diff	CORRECT	13	95	-1	contour027	Song	2.92	2.92
40	0.934	same	diff	INCORRECT	13	95	-1	contour071	Intermediate	2.2	2.2
61	0.772	same	diff	INCORRECT	13	95	-1	contour046	Intermediate	-2.59	2.59
55	1.356	same	same	CORRECT	13	95	-1	contour059	Intermediate	0	0
81	0.607	same	diff	INCORRECT	13	95	-1	contour057	Speech	-2.74	2.74
92	1.669	diff	diff	CORRECT	13	95	-1	contour163	Song	1.59	1.59
53	1.131	same	same	CORRECT	13	95	-1	contour073	Song	0	0
70	1.952	same	diff	INCORRECT	13	95	-1	contour174	Intermediate	1.41	1.41
25	0.832	same	same	CORRECT	13	95	-1	contour171	Intermediate	0	0
3	1.76	diff	same	INCORRECT	13	95	-1	contour070	Speech	0	0
109	0.705	same	diff	INCORRECT	13	95	-1	contour156	Intermediate	0	0
35	1.033	diff	diff	CORRECT	13	95	-1	contour103	Song	8.4	8.4
45	0.766	diff	diff	CORRECT	13	95	-1	contour044	Speech	0	0
46	0.58	same	same	CORRECT	13	95	-1	contour044	Intermediate	0	0
97	0.878	diff	same	INCORRECT	13	95	-1	contour083	Intermediate	0	0
62	1.735	diff	diff	CORRECT	13	95	-1	contour046	Song	-1.75	1.75
89	1.261	diff	same	INCORRECT	13	95	-1	contour135	Song	0	0
80	0.717	diff	diff	CORRECT	13	95	-1	contour151	Song	2.92	2.92
87	2.505	same	same	CORRECT	13	95	-1	contour135	Speech	0	0
118	2.489	same	diff	INCORRECT	13	95	-1	contour146	Intermediate	-2.82	2.82
99	1.094	same	same	CORRECT	13	95	-1	contour107	Speech	0	0
1	1.654	same	same	CORRECT	13	95	-1	contour185	Intermediate	0	0
59	2.839	diff	same	INCORRECT	13	95	-1	contour072	Song	0	0
107	2.207	diff	diff	CORRECT	13	95	-1	contour017	Song	3.16	3.16
27	0.807	same	same	CORRECT	13	95	-1	contour148	Speech	0	0
82	0.985	same	same	CORRECT	13	95	-1	contour057	Intermediate	0	0
34	0.748	diff	same	INCORRECT	13	95	-1	contour103	Intermediate	0	0
29	0.883	same	diff	INCORRECT	13	95	-1	contour148	Song	1.35	1.35
66	1.017	same	same	CORRECT	13	95	-1	contour106	Speech	0	0
69	1.175	diff	diff	CORRECT	13	95	-1	contour174	Speech	-2.18	2.18
63	0.735	same	same	CORRECT	13	95	-1	contour027	Speech	0	0
13	1.283	diff	same	INCORRECT	13	95	-1	contour003	Intermediate	0	0
94	1.206	same	diff	INCORRECT	13	95	-1	contour047	Intermediate	2.82	2.82
79	2.604	same	same	CORRECT	13	95	-1	contour151	Intermediate	0	0
67	0.811	diff	diff	CORRECT	13	95	-1	contour106	Intermediate	1.95	1.95
103	0.814	same	diff	INCORRECT	13	95	-1	contour130	Intermediate	1.39	1.39
37	1.464	same	same	CORRECT	13	95	-1	contour037	Intermediate	0	0
15	1.746	same	same	CORRECT	13	95	-1	contour178	Speech	0	0
75	1.265	same	same	CORRECT	13	95	-1	contour139	Speech	0	0
119	1.117	same	diff	INCORRECT	13	95	-1	contour146	Song	-1.47	1.47
100	0.96	same	same	CORRECT	13	95	-1	contour107	Intermediate	0	0
22	0.892	diff	diff	CORRECT	13	95	-1	contour179	Intermediate	-2.56	2.56
68	0.624	same	same	CORRECT	13	95	-1	contour106	Song	0	0
52	1.061	diff	same	INCORRECT	13	95	-1	contour073	Intermediate	0	0
51	1.177	diff	same	INCORRECT	13	95	-1	contour073	Speech	0	0
50	1.058	diff	same	INCORRECT	13	95	-1	contour076	Song	0	0
115	0.312	diff	diff	CORRECT	13	95	-1	contour164	Intermediate	1.43	1.43
91	0.879	diff	same	INCORRECT	13	95	-1	contour163	Intermediate	0	0
49	1.026	diff	same	INCORRECT	13	95	-1	contour076	Intermediate	0	0
114	0.79	same	diff	INCORRECT	13	95	-1	contour164	Speech	-2.08	2.08
14	0.875	same	diff	INCORRECT	13	95	-1	contour003	Song	-1.6	1.6
24	1.582	same	same	CORRECT	13	95	-1	contour171	Speech	0	0
19	0.499	diff	same	INCORRECT	13	95	-1	contour064	Intermediate	0	0
64	0.844	same	diff	INCORRECT	13	95	-1	contour027	Intermediate	-2.84	2.84
88	0.769	same	diff	INCORRECT	13	95	-1	contour135	Intermediate	-2.57	2.57
78	1.211	same	diff	INCORRECT	13	95	-1	contour151	Speech	-2.29	2.29
11	0.68	same	diff	INCORRECT	13	95	-1	contour012	Song	-1.34	1.34
43	0.85	same	diff	INCORRECT	13	95	-1	contour009	Intermediate	-2.34	2.34
72	1.034	same	same	CORRECT	13	95	-1	contour109	Speech	0	0
7	0.804	same	diff	INCORRECT	13	95	-1	contour075	Intermediate	-5.39	5.39
104	1.61	same	same	CORRECT	13	95	-1	contour130	Song	0	0
116	0.628	same	same	CORRECT	13	95	-1	contour164	Song	0	0
102	3.442	same	diff	INCORRECT	13	95	-1	contour130	Speech	-1.97	1.97
56	1.268	same	same	CORRECT	13	95	-1	contour059	Song	0	0
30	1.411	same	same	CORRECT	13	95	-1	contour036	Speech	0	0
76	1.54	same	diff	INCORRECT	13	95	-1	contour139	Intermediate	0	0
27	1.548	same	same	CORRECT	14	65	-0.666667	contour148	Speech	0	0
54	4.127	same	diff	INCORRECT	14	65	-0.666667	contour059	Speech	-1.76	1.76
46	2.15	same	same	CORRECT	14	65	-0.666667	contour044	Intermediate	0	0
119	6.002	same	diff	INCORRECT	14	65	-0.666667	contour146	Song	-1.47	1.47
76	1.615	diff	diff	CORRECT	14	65	-0.666667	contour139	Intermediate	0	0
18	2.283	same	same	CORRECT	14	65	-0.666667	contour064	Speech	0	0
35	1.495	same	diff	INCORRECT	14	65	-0.666667	contour103	Song	8.4	8.4
50	2.48	same	same	CORRECT	14	65	-0.666667	contour076	Song	0	0
28	0.689	diff	diff	CORRECT	14	65	-0.666667	contour148	Intermediate	2.29	2.29
40	0.748	same	diff	INCORRECT	14	65	-0.666667	contour071	Intermediate	2.2	2.2
108	1.682	same	same	CORRECT	14	65	-0.666667	contour156	Speech	0	0
20	2.093	same	diff	INCORRECT	14	65	-0.666667	contour064	Song	-1.33	1.33
48	3.72	same	same	CORRECT	14	65	-0.666667	contour076	Speech	0	0
97	1.753	diff	same	INCORRECT	14	65	-0.666667	contour083	Intermediate	0	0
90	1.115	same	same	CORRECT	14	65	-0.666667	contour163	Speech	0	0
5	1.555	same	same	CORRECT	14	65	-0.666667	contour070	Song	0	0
109	0.845	same	diff	INCORRECT	14	65	-0.666667	contour156	Intermediate	0	0
36	2.196	same	same	CORRECT	14	65	-0.666667	contour037	Speech	0	0
25	1.417	diff	same	INCORRECT	14	65	-0.666667	contour171	Intermediate	0	0
13	1.721	same	same	CORRECT	14	65	-0.666667	contour003	Intermediate	0	0
84	3.469	same	same	CORRECT	14	65	-0.666667	contour068	Speech	0	0
11	2.351	same	diff	INCORRECT	14	65	-0.666667	contour012	Song	-1.34	1.34
17	0.685	diff	diff	CORRECT	14	65	-0.666667	contour178	Song	-1.61	1.61
100	2.402	same	same	CORRECT	14	65	-0.666667	contour107	Intermediate	0	0
69	0.995	same	diff	INCORRECT	14	65	-0.666667	contour174	Speech	-2.18	2.18
37	0.994	same	same	CORRECT	14	65	-0.666667	contour037	Intermediate	0	0
52	1.839	diff	same	INCORRECT	14	65	-0.666667	contour073	Intermediate	0	0
66	1.322	diff	same	INCORRECT	14	65	-0.666667	contour106	Speech	0	0
64	1.361	diff	diff	CORRECT	14	65	-0.666667	contour027	Intermediate	-2.84	2.84
89	1.719	same	same	CORRECT	14	65	-0.666667	contour135	Song	0	0
38	1.746	same	same	CORRECT	14	65	-0.666667	contour037	Song	0	0
88	4.373	same	diff	INCORRECT	14	65	-0.666667	contour135	Intermediate	-2.57	2.57
57	1.489	diff	same	INCORRECT	14	65	-0.666667	contour072	Speech	0	0
78	3.762	diff	diff	CORRECT	14	65	-0.666667	contour151	Speech	-2.29	2.29
114	2.466	same	diff	INCORRECT	14	65	-0.666667	contour164	Speech	-2.08	2.08
112	0.984	diff	diff	CORRECT	14	65	-0.666667	contour136	Intermediate	-3.21	3.21
86	0.755	diff	diff	CORRECT	14	65	-0.666667	contour068	Song	2.92	2.92
53	1.382	same	same	CORRECT	14	65	-0.666667	contour073	Song	0	0
111	1.199	same	same	CORRECT	14	65	-0.666667	contour136	Speech	0	0
72	0.975	diff	same	INCORRECT	14	65	-0.666667	contour109	Speech	0	0
49	1.685	diff	same	INCORRECT	14	65	-0.666667	contour076	Intermediate	0	0
3	2.651	diff	same	INCORRECT	14	65	-0.666667	contour070	Speech	0	0
113	1.134	same	diff	INCORRECT	14	65	-0.666667	contour136	Song	-1.35	1.35
43	1.879	same	diff	INCORRECT	14	65	-0.666667	contour009	Intermediate	-2.34	2.34
1	1.153	same	same	CORRECT	14	65	-0.666667	contour185	Intermediate	0	0
30	0.774	same	same	CORRECT	14	65	-0.666667	contour036	Speech	0	0
80	0.887	diff	diff	CORRECT	14	65	-0.666667	contour151	Song	2.92	2.92
65	1.462	diff	diff	CORRECT	14	65	-0.666667	contour027	Song	2.92	2.92
103	1.773	same	diff	INCORRECT	14	65	-0.666667	contour130	Intermediate	1.39	1.39
14	1.047	same	diff	INCORRECT	14	65	-0.666667	contour003	Song	-1.6	1.6
92	1.189	diff	diff	CORRECT	14	65	-0.666667	contour163	Song	1.59	1.59
73	0.964	diff	diff	CORRECT	14	65	-0.666667	contour109	Intermediate	-1.65	1.65
31	1.751	same	diff	INCORRECT	14	65	-0.666667	contour036	Intermediate	0	0
16	1.507	same	same	CORRECT	14	65	-0.666667	contour178	Intermediate	0	0
12	1.273	diff	diff	CORRECT	14	65	-0.666667	contour003	Speech	-2.75	2.75
9	1.394	diff	same	INCORRECT	14	65	-0.666667	contour012	Speech	0	0
0	1.966	same	diff	INCORRECT	14	65	-0.666667	contour185	Speech	-1.82	1.82
55	2.434	same	same	CORRECT	14	65	-0.666667	contour059	Intermediate	0	0
115	1.207	diff	diff	CORRECT	14	65	-0.666667	contour164	Intermediate	1.43	1.43
56	2.078	diff	same	INCORRECT	14	65	-0.666667	contour059	Song	0	0
91	1.589	same	same	CORRECT	14	65	-0.666667	contour163	Intermediate	0	0
70	0.898	same	diff	INCORRECT	14	65	-0.666667	contour174	Intermediate	1.41	1.41
10	2.776	same	same	CORRECT	14	65	-0.666667	contour012	Intermediate	0	0
118	0.91	diff	diff	CORRECT	14	65	-0.666667	contour146	Intermediate	-2.82	2.82
8	1.148	diff	diff	CORRECT	14	65	-0.666667	contour075	Song	-4.96	4.96
96	1.406	same	diff	INCORRECT	14	65	-0.666667	contour083	Speech	-2.16	2.16
7	4.355	diff	diff	CORRECT	14	65	-0.666667	contour075	Intermediate	-5.39	5.39
106	2.885	diff	diff	CORRECT	14	65	-0.666667	contour017	Intermediate	-3.27	3.27
99	1.434	same	same	CORRECT	14	65	-0.666667	contour107	Speech	0	0
77	1.3	same	diff	INCORRECT	14	65	-0.666667	contour139	Song	-1.34	1.34
116	1.672	same	same	CORRECT	14	65	-0.666667	contour164	Song	0	0
74	2.697	same	diff	INCORRECT	14	65	-0.666667	contour109	Song	2.71	2.71
98	3.238	same	diff	INCORRECT	14	65	-0.666667	contour083	Song	2.92	2.92
19	1.019	diff	same	INCORRECT	14	65	-0.666667	contour064	Intermediate	0	0
62	3.394	diff	diff	CORRECT	14	65	-0.666667	contour046	Song	-1.75	1.75
83	3.511	same	same	CORRECT	14	65	-0.666667	contour057	Song	0	0
15	1.84	same	same	CORRECT	14	65	-0.666667	contour178	Speech	0	0
44	5.406	same	same	CORRECT	14	65	-0.666667	contour009	Song	0	0
85	1.204	same	same	CORRECT	14	65	-0.666667	contour068	Intermediate	0	0
41	3.063	same	same	CORRECT	14	65	-0.666667	contour071	Song	0	0
59	2.185	diff	same	INCORRECT	14	65	-0.666667	contour072	Song	0	0
26	0.821	diff	diff	CORRECT	14	65	-0.666667	contour171	Song	-1.6	1.6
32	1.93	same	same	CORRECT	14	65	-0.666667	contour036	Song	0	0
4	2.182	same	diff	INCORRECT	14	65	-0.666667	contour070	Intermediate	1.01	1.01
23	1.497	diff	diff	CORRECT	14	65	-0.666667	contour179	Song	3.16	3.16
51	3.303	same	same	CORRECT	14	65	-0.666667	contour073	Speech	0	0
29	1.436	diff	diff	CORRECT	14	65	-0.666667	contour148	Song	1.35	1.35
110	1.115	same	diff	INCORRECT	14	65	-0.666667	contour156	Song	-1.46	1.46
61	2.264	same	diff	INCORRECT	14	65	-0.666667	contour046	Intermediate	-2.59	2.59
93	1.12	same	same	CORRECT	14	65	-0.666667	contour047	Speech	0	0
45	2.344	diff	diff	CORRECT	14	65	-0.666667	contour044	Speech	0	0
2	6.735	same	same	CORRECT	14	65	-0.666667	contour185	Song	0	0
24	1.296	diff	same	INCORRECT	14	65	-0.666667	contour171	Speech	0	0
39	1.791	same	same	CORRECT	14	65	-0.666667	contour071	Speech	0	0
47	1.37	same	same	CORRECT	14	65	-0.666667	contour044	Song	0	0
102	1.152	diff	diff	CORRECT	14	65	-0.666667	contour130	Speech	-1.97	1.97
33	3.377	same	same	CORRECT	14	65	-0.666667	contour103	Speech	0	0
104	5.104	same	same	CORRECT	14	65	-0.666667	contour130	Song	0	0
79	1.666	same	same	CORRECT	14	65	-0.666667	contour151	Intermediate	0	0
117	1.094	same	diff	INCORRECT	14	65	-0.666667	contour146	Speech	2.27	2.27
63	1.219	diff	same	INCORRECT	14	65	-0.666667	contour027	Speech	0	0
34	4.547	same	same	CORRECT	14	65	-0.666667	contour103	Intermediate	0	0
107	0.748	diff	diff	CORRECT	14	65	-0.666667	contour017	Song	3.16	3.16
22	1.617	same	diff	INCORRECT	14	65	-0.666667	contour179	Intermediate	-2.56	2.56
75	1.349	same	same	CORRECT	14	65	-0.666667	contour139	Speech	0	0
60	2.256	same	same	CORRECT	14	65	-0.666667	contour046	Speech	0	0
58	1.128	diff	same	INCORRECT	14	65	-0.666667	contour072	Intermediate	0	0
67	1.295	same	diff	INCORRECT	14	65	-0.666667	contour106	Intermediate	1.95	1.95
6	1.846	same	diff	INCORRECT	14	65	-0.666667	contour075	Speech	2.67	2.67
101	1.152	same	diff	INCORRECT	14	65	-0.666667	contour107	Song	2.7	2.7
87	2.625	same	same	CORRECT	14	65	-0.666667	contour135	Speech	0	0
105	2.809	same	diff	INCORRECT	14	65	-0.666667	contour017	Speech	2.36	2.36
21	0.997	diff	diff	CORRECT	14	65	-0.666667	contour179	Speech	-3.71	3.71
81	0.857	diff	diff	CORRECT	14	65	-0.666667	contour057	Speech	-2.74	2.74
68	1.759	same	same	CORRECT	14	65	-0.666667	contour106	Song	0	0
94	0.781	diff	diff	CORRECT	14	65	-0.666667	contour047	Intermediate	2.82	2.82
95	0.677	same	diff	INCORRECT	14	65	-0.666667	contour047	Song	-1.46	1.46
42	0.976	same	diff	INCORRECT	14	65	-0.666667	contour009	Speech	-3.32	3.32
71	0.683	diff	diff	CORRECT	14	65	-0.666667	contour174	Song	-1.58	1.58
82	1.964	same	same	CORRECT	14	65	-0.666667	contour057	Intermediate	0	0
54	2.371	same	diff	INCORRECT	15	62	-0.5	contour059	Speech	-1.76	1.76
27	4.697	same	same	CORRECT	15	62	-0.5	contour148	Speech	0	0
78	2.942	same	diff	INCORRECT	15	62	-0.5	contour151	Speech	-2.29	2.29
37	2.407	same	same	CORRECT	15	62	-0.5	contour037	Intermediate	0	0
2	3.336	same	same	CORRECT	15	62	-0.5	contour185	Song	0	0
115	2.921	same	diff	INCORRECT	15	62	-0.5	contour164	Intermediate	1.43	1.43
66	0.705	diff	same	INCORRECT	15	62	-0.5	contour106	Speech	0	0
16	1.914	same	same	CORRECT	15	62	-0.5	contour178	Intermediate	0	0
81	0.882	diff	diff	CORRECT	15	62	-0.5	contour057	Speech	-2.74	2.74
10	1.722	diff	same	INCORRECT	15	62	-0.5	contour012	Intermediate	0	0
33	5.254	diff	same	INCORRECT	15	62	-0.5	contour103	Speech	0	0
61	1.83	same	diff	INCORRECT	15	62	-0.5	contour046	Intermediate	-2.59	2.59
74	1.47	same	diff	INCORRECT	15	62	-0.5	contour109	Song	2.71	2.71
79	2.263	same	same	CORRECT	15	62	-0.5	contour151	Intermediate	0	0
91	1.77	same	same	CORRECT	15	62	-0.5	contour163	Intermediate	0	0
103	1.702	same	diff	INCORRECT	15	62	-0.5	contour130	Intermediate	1.39	1.39
29	1.548	diff	diff	CORRECT	15	62	-0.5	contour148	Song	1.35	1.35
0	2.106	same	diff	INCORRECT	15	62	-0.5	contour185	Speech	-1.82	1.82
32	3.899	diff	same	INCORRECT	15	62	-0.5	contour036	Song	0	0
83	1.145	same	same	CORRECT	15	62	-0.5	contour057	Song	0	0
105	3.76	diff	diff	CORRECT	15	62	-0.5	contour017	Speech	2.36	2.36
113	2.355	same	diff	INCORRECT	15	62	-0.5	contour136	Song	-1.35	1.35
35	2.499	same	diff	INCORRECT	15	62	-0.5	contour103	Song	8.4	8.4
43	3.504	same	diff	INCORRECT	15	62	-0.5	contour009	Intermediate	-2.34	2.34
8	1.819	diff	diff	CORRECT	15	62	-0.5	contour075	Song	-4.96	4.96
93	2.247	same	same	CORRECT	15	62	-0.5	contour047	Speech	0	0
102	4.263	same	diff	INCORRECT	15	62	-0.5	contour130	Speech	-1.97	1.97
11	3.305	same	diff	INCORRECT	15	62	-0.5	contour012	Song	-1.34	1.34
55	4.803	diff	same	INCORRECT	15	62	-0.5	contour059	Intermediate	0	0
40	2.817	same	diff	INCORRECT	15	62	-0.5	contour071	Intermediate	2.2	2.2
117	4.93	same	diff	INCORRECT	15	62	-0.5	contour146	Speech	2.27	2.27
31	1.964	diff	diff	CORRECT	15	62	-0.5	contour036	Intermediate	0	0
6	2.934	same	diff	INCORRECT	15	62	-0.5	contour075	Speech	2.67	2.67
48	2.743	same	same	CORRECT	15	62	-0.5	contour076	Speech	0	0
30	2.818	diff	same	INCORRECT	15	62	-0.5	contour036	Speech	0	0
17	7.899	diff	diff	CORRECT	15	62	-0.5	contour178	Song	-1.61	1.61
87	2.406	same	same	CORRECT	15	62	-0.5	contour135	Speech	0	0
60	5.041	diff	same	INCORRECT	15	62	-0.5	contour046	Speech	0	0
86	5.208	diff	diff	CORRECT	15	62	-0.5	contour068	Song	2.92	2.92
118	2.441	same	diff	INCORRECT	15	62	-0.5	contour146	Intermediate	-2.82	2.82
80	2.673	same	diff	INCORRECT	15	62	-0.5	contour151	Song	2.92	2.92
99	1.564	same	same	CORRECT	15	62	-0.5	contour107	Speech	0	0
24	1.737	same	same	CORRECT	15	62	-0.5	contour171	Speech	0	0
101	2.077	same	diff	INCORRECT	15	62	-0.5	contour107	Song	2.7	2.7
68	1.721	diff	same	INCORRECT	15	62	-0.5	contour106	Song	0	0
96	1.548	same	diff	INCORRECT	15	62	-0.5	contour083	Speech	-2.16	2.16
23	1.256	same	diff	INCORRECT	15	62	-0.5	contour179	Song	3.16	3.16
39	2.638	same	same	CORRECT	15	62	-0.5	contour071	Speech	0	0
104	1.496	same	same	CORRECT	15	62	-0.5	contour130	Song	0	0
49	2.091	same	same	CORRECT	15	62	-0.5	contour076	Intermediate	0	0
19	3.678	same	same	CORRECT	15	62	-0.5	contour064	Intermediate	0	0
9	6.843	same	same	CORRECT	15	62	-0.5	contour012	Speech	0	0
59	2.239	same	same	CORRECT	15	62	-0.5	contour072	Song	0	0
114	4.633	diff	diff	CORRECT	15	62	-0.5	contour164	Speech	-2.08	2.08
46	1.509	same	same	CORRECT	15	62	-0.5	contour044	Intermediate	0	0
5	4.159	diff	same	INCORRECT	15	62	-0.5	contour070	Song	0	0
58	1.806	same	same	CORRECT	15	62	-0.5	contour072	Intermediate	0	0
110	9.127	diff	diff	CORRECT	15	62	-0.5	contour156	Song	-1.46	1.46
21	3.288	diff	diff	CORRECT	15	62	-0.5	contour179	Speech	-3.71	3.71
100	1.676	same	same	CORRECT	15	62	-0.5	contour107	Intermediate	0	0
3	1.713	same	same	CORRECT	15	62	-0.5	contour070	Speech	0	0
85	2.724	same	same	CORRECT	15	62	-0.5	contour068	Intermediate	0	0
90	2.518	same	same	CORRECT	15	62	-0.5	contour163	Speech	0	0
75	4.873	same	same	CORRECT	15	62	-0.5	contour139	Speech	0	0
41	1.602	same	same	CORRECT	15	62	-0.5	contour071	Song	0	0
65	1.568	diff	diff	CORRECT	15	62	-0.5	contour027	Song	2.92	2.92
45	1.145	same	diff	INCORRECT	15	62	-0.5	contour044	Speech	0	0
107	4.817	same	diff	INCORRECT	15	62	-0.5	contour017	Song	3.16	3.16
36	1.712	same	same	CORRECT	15	62	-0.5	contour037	Speech	0	0
84	2.018	diff	same	INCORRECT	15	62	-0.5	contour068	Speech	0	0
18	1.411	same	same	CORRECT	15	62	-0.5	contour064	Speech	0	0
70	5.927	same	diff	INCORRECT	15	62	-0.5	contour174	Intermediate	1.41	1.41
116	1.098	diff	same	INCORRECT	15	62	-0.5	contour164	Song	0	0
52	1.105	same	same	CORRECT	15	62	-0.5	contour073	Intermediate	0	0
57	1.505	same	same	CORRECT	15	62	-0.5	contour072	Speech	0	0
51	3.244	same	same	CORRECT	15	62	-0.5	contour073	Speech	0	0
7	7.034	same	diff	INCORRECT	15	62	-0.5	contour075	Intermediate	-5.39	5.39
63	1.666	same	same	CORRECT	15	62	-0.5	contour027	Speech	0	0
112	2.667	same	diff	INCORRECT	15	62	-0.5	contour136	Intermediate	-3.21	3.21
69	6.278	same	diff	INCORRECT	15	62	-0.5	contour174	Speech	-2.18	2.18
97	1.809	same	same	CORRECT	15	62	-0.5	contour083	Intermediate	0	0
4	2.147	diff	diff	CORRECT	15	62	-0.5	contour070	Intermediate	1.01	1.01
53	1.394	same	same	CORRECT	15	62	-0.5	contour073	Song	0	0
26	2.349	diff	diff	CORRECT	15	62	-0.5	contour171	Song	-1.6	1.6
77	1.268	same	diff	INCORRECT	15	62	-0.5	contour139	Song	-1.34	1.34
67	2.745	same	diff	INCORRECT	15	62	-0.5	contour106	Intermediate	1.95	1.95
42	2.795	diff	diff	CORRECT	15	62	-0.5	contour009	Speech	-3.32	3.32
88	1.758	same	diff	INCORRECT	15	62	-0.5	contour135	Intermediate	-2.57	2.57
56	2.134	diff	same	INCORRECT	15	62	-0.5	contour059	Song	0	0
119	1.616	same	diff	INCORRECT	15	62	-0.5	contour146	Song	-1.47	1.47
22	2.653	same	diff	INCORRECT	15	62	-0.5	contour179	Intermediate	-2.56	2.56
111	1.842	same	same	CORRECT	15	62	-0.5	contour136	Speech	0	0
82	3.149	same	same	CORRECT	15	62	-0.5	contour057	Intermediate	0	0
14	1.419	same	diff	INCORRECT	15	62	-0.5	contour003	Song	-1.6	1.6
98	1.733	diff	diff	CORRECT	15	62	-0.5	contour083	Song	2.92	2.92
71	1.707	diff	diff	CORRECT	15	62	-0.5	contour174	Song	-1.58	1.58
62	2.207	same	diff	INCORRECT	15	62	-0.5	contour046	Song	-1.75	1.75
20	2.098	same	diff	INCORRECT	15	62	-0.5	contour064	Song	-1.33	1.33
72	1.677	same	same	CORRECT	15	62	-0.5	contour109	Speech	0	0
25	1.278	same	same	CORRECT	15	62	-0.5	contour171	Intermediate	0	0
50	1.68	same	same	CORRECT	15	62	-0.5	contour076	Song	0	0
44	2.31	same	same	CORRECT	15	62	-0.5	contour009	Song	0	0
89	3.057	same	same	CORRECT	15	62	-0.5	contour135	Song	0	0
15	1.787	same	same	CORRECT	15	62	-0.5	contour178	Speech	0	0
95	1.212	diff	diff	CORRECT	15	62	-0.5	contour047	Song	-1.46	1.46
108	1.334	same	same	CORRECT	15	62	-0.5	contour156	Speech	0	0
38	2.015	same	same	CORRECT	15	62	-0.5	contour037	Song	0	0
76	1.231	same	diff	INCORRECT	15	62	-0.5	contour139	Intermediate	0	0
12	3.526	diff	diff	CORRECT	15	62	-0.5	contour003	Speech	-2.75	2.75
34	1.32	same	same	CORRECT	15	62	-0.5	contour103	Intermediate	0	0
1	1.457	same	same	CORRECT	15	62	-0.5	contour185	Intermediate	0	0
64	1.929	same	diff	INCORRECT	15	62	-0.5	contour027	Intermediate	-2.84	2.84
94	2.161	same	diff	INCORRECT	15	62	-0.5	contour047	Intermediate	2.82	2.82
106	2.314	diff	diff	CORRECT	15	62	-0.5	contour017	Intermediate	-3.27	3.27
13	1.277	same	same	CORRECT	15	62	-0.5	contour003	Intermediate	0	0
73	0.93	same	diff	INCORRECT	15	62	-0.5	contour109	Intermediate	-1.65	1.65
28	1.191	same	diff	INCORRECT	15	62	-0.5	contour148	Intermediate	2.29	2.29
47	1.647	same	same	CORRECT	15	62	-0.5	contour044	Song	0	0
92	1.677	diff	diff	CORRECT	15	62	-0.5	contour163	Song	1.59	1.59
109	1.051	same	diff	INCORRECT	15	62	-0.5	contour156	Intermediate	0	0
62	1.214	same	diff	INCORRECT	16	58	-0.5	contour046	Song	-1.75	1.75
14	1.92	same	diff	INCORRECT	16	58	-0.5	contour003	Song	-1.6	1.6
38	1.491	diff	same	INCORRECT	16	58	-0.5	contour037	Song	0	0
118	4.667	diff	diff	CORRECT	16	58	-0.5	contour146	Intermediate	-2.82	2.82
96	1.664	same	diff	INCORRECT	16	58	-0.5	contour083	Speech	-2.16	2.16
2	2.994	same	same	CORRECT	16	58	-0.5	contour185	Song	0	0
42	3.113	same	diff	INCORRECT	16	58	-0.5	contour009	Speech	-3.32	3.32
44	1.197	same	same	CORRECT	16	58	-0.5	contour009	Song	0	0
0	1.353	diff	diff	CORRECT	16	58	-0.5	contour185	Speech	-1.82	1.82
1	2.343	same	same	CORRECT	16	58	-0.5	contour185	Intermediate	0	0
112	4.204	same	diff	INCORRECT	16	58	-0.5	contour136	Intermediate	-3.21	3.21
93	1.259	same	same	CORRECT	16	58	-0.5	contour047	Speech	0	0
51	1.123	same	same	CORRECT	16	58	-0.5	contour073	Speech	0	0
84	2.622	same	same	CORRECT	16	58	-0.5	contour068	Speech	0	0
91	5.42	same	same	CORRECT	16	58	-0.5	contour163	Intermediate	0	0
116	1.308	diff	same	INCORRECT	16	58	-0.5	contour164	Song	0	0
79	1.056	diff	same	INCORRECT	16	58	-0.5	contour151	Intermediate	0	0
59	1.218	same	same	CORRECT	16	58	-0.5	contour072	Song	0	0
76	1.607	same	diff	INCORRECT	16	58	-0.5	contour139	Intermediate	0	0
30	4.656	same	same	CORRECT	16	58	-0.5	contour036	Speech	0	0
20	1.654	same	diff	INCORRECT	16	58	-0.5	contour064	Song	-1.33	1.33
28	1.366	diff	diff	CORRECT	16	58	-0.5	contour148	Intermediate	2.29	2.29
89	1.541	diff	same	INCORRECT	16	58	-0.5	contour135	Song	0	0
109	2.8	same	diff	INCORRECT	16	58	-0.5	contour156	Intermediate	0	0
58	4.549	same	same	CORRECT	16	58	-0.5	contour072	Intermediate	0	0
108	1.898	same	same	CORRECT	16	58	-0.5	contour156	Speech	0	0
45	1.267	same	diff	INCORRECT	16	58	-0.5	contour044	Speech	0	0
100	1.432	same	same	CORRECT	16	58	-0.5	contour107	Intermediate	0	0
114	2.708	same	diff	INCORRECT	16	58	-0.5	contour164	Speech	-2.08	2.08
11	1.337	same	diff	INCORRECT	16	58	-0.5	contour012	Song	-1.34	1.34
46	2.502	same	same	CORRECT	16	58	-0.5	contour044	Intermediate	0	0
35	2.226	same	diff	INCORRECT	16	58	-0.5	contour103	Song	8.4	8.4
83	2.074	diff	same	INCORRECT	16	58	-0.5	contour057	Song	0	0
115	2.91	same	diff	INCORRECT	16	58	-0.5	contour164	Intermediate	1.43	1.43
32	3.781	same	same	CORRECT	16	58	-0.5	contour036	Song	0	0
107	2.777	same	diff	INCORRECT	16	58	-0.5	contour017	Song	3.16	3.16
26	2.283	same	diff	INCORRECT	16	58	-0.5	contour171	Song	-1.6	1.6
64	1.067	diff	diff	CORRECT	16	58	-0.5	contour027	Intermediate	-2.84	2.84
99	4.507	same	same	CORRECT	16	58	-0.5	contour107	Speech	0	0
19	1.243	diff	same	INCORRECT	16	58	-0.5	contour064	Intermediate	0	0
77	1.776	same	diff	INCORRECT	16	58	-0.5	contour139	Song	-1.34	1.34
103	3.703	same	diff	INCORRECT	16	58	-0.5	contour130	Intermediate	1.39	1.39
8	1.351	diff	diff	CORRECT	16	58	-0.5	contour075	Song	-4.96	4.96
82	1.509	diff	same	INCORRECT	16	58	-0.5	contour057	Intermediate	0	0
36	2.241	diff	same	INCORRECT	16	58	-0.5	contour037	Speech	0	0
80	4.456	same	diff	INCORRECT	16	58	-0.5	contour151	Song	2.92	2.92
87	3.443	same	same	CORRECT	16	58	-0.5	contour135	Speech	0	0
65	1.736	diff	diff	CORRECT	16	58	-0.5	contour027	Song	2.92	2.92
74	2.79	diff	diff	CORRECT	16	58	-0.5	contour109	Song	2.71	2.71
52	1.32	same	same	CORRECT	16	58	-0.5	contour073	Intermediate	0	0
15	4.343	diff	same	INCORRECT	16	58	-0.5	contour178	Speech	0	0
119	4.909	same	diff	INCORRECT	16	58	-0.5	contour146	Song	-1.47	1.47
97	1.582	same	same	CORRECT	16	58	-0.5	contour083	Intermediate	0	0
54	1.418	same	diff	INCORRECT	16	58	-0.5	contour059	Speech	-1.76	1.76
48	3.89	same	same	CORRECT	16	58	-0.5	contour076	Speech	0	0
72	2.841	same	same	CORRECT	16	58	-0.5	contour109	Speech	0	0
3	1.977	same	same	CORRECT	16	58	-0.5	contour070	Speech	0	0
101	1.785	same	diff	INCORRECT	16	58	-0.5	contour107	Song	2.7	2.7
105	1.168	diff	diff	CORRECT	16	58	-0.5	contour017	Speech	2.36	2.36
98	4.573	diff	diff	CORRECT	16	58	-0.5	contour083	Song	2.92	2.92
4	5.191	same	diff	INCORRECT	16	58	-0.5	contour070	Intermediate	1.01	1.01
63	7.903	same	same	CORRECT	16	58	-0.5	contour027	Speech	0	0
67	9.784	same	diff	INCORRECT	16	58	-0.5	contour106	Intermediate	1.95	1.95
66	1.439	same	same	CORRECT	16	58	-0.5	contour106	Speech	0	0
34	1.352	same	same	CORRECT	16	58	-0.5	contour103	Intermediate	0	0
73	2.849	same	diff	INCORRECT	16	58	-0.5	contour109	Intermediate	-1.65	1.65
37	6.967	diff	same	INCORRECT	16	58	-0.5	contour037	Intermediate	0	0
60	4.146	same	same	CORRECT	16	58	-0.5	contour046	Speech	0	0
47	3.439	same	same	CORRECT	16	58	-0.5	contour044	Song	0	0
70	2.351	same	diff	INCORRECT	16	58	-0.5	contour174	Intermediate	1.41	1.41
6	1.84	diff	diff	CORRECT	16	58	-0.5	contour075	Speech	2.67	2.67
10	1.984	same	same	CORRECT	16	58	-0.5	contour012	Intermediate	0	0
25	1.856	same	same	CORRECT	16	58	-0.5	contour171	Intermediate	0	0
71	5.059	same	diff	INCORRECT	16	58	-0.5	contour174	Song	-1.58	1.58
29	6.168	same	diff	INCORRECT	16	58	-0.5	contour148	Song	1.35	1.35
90	3.356	same	same	CORRECT	16	58	-0.5	contour163	Speech	0	0
41	4.222	same	same	CORRECT	16	58	-0.5	contour071	Song	0	0
92	1.284	diff	diff	CORRECT	16	58	-0.5	contour163	Song	1.59	1.59
106	2.45	diff	diff	CORRECT	16	58	-0.5	contour017	Intermediate	-3.27	3.27
113	3.424	same	diff	INCORRECT	16	58	-0.5	contour136	Song	-1.35	1.35
68	2.494	same	same	CORRECT	16	58	-0.5	contour106	Song	0	0
61	2.081	diff	diff	CORRECT	16	58	-0.5	contour046	Intermediate	-2.59	2.59
23	2.319	diff	diff	CORRECT	16	58	-0.5	contour179	Song	3.16	3.16
21	1.902	diff	diff	CORRECT	16	58	-0.5	contour179	Speech	-3.71	3.71
50	1.347	same	same	CORRECT	16	58	-0.5	contour076	Song	0	0
57	6.952	same	same	CORRECT	16	58	-0.5	contour072	Speech	0	0
117	6.835	diff	diff	CORRECT	16	58	-0.5	contour146	Speech	2.27	2.27
43	3.304	same	diff	INCORRECT	16	58	-0.5	contour009	Intermediate	-2.34	2.34
18	1.798	same	same	CORRECT	16	58	-0.5	contour064	Speech	0	0
7	4.239	diff	diff	CORRECT	16	58	-0.5	contour075	Intermediate	-5.39	5.39
69	1.305	same	diff	INCORRECT	16	58	-0.5	contour174	Speech	-2.18	2.18
110	1.936	same	diff	INCORRECT	16	58	-0.5	contour156	Song	-1.46	1.46
40	2.003	diff	diff	CORRECT	16	58	-0.5	contour071	Intermediate	2.2	2.2
27	5.073	diff	same	INCORRECT	16	58	-0.5	contour148	Speech	0	0
95	2.388	same	diff	INCORRECT	16	58	-0.5	contour047	Song	-1.46	1.46
86	1.359	same	diff	INCORRECT	16	58	-0.5	contour068	Song	2.92	2.92
56	1.378	diff	same	INCORRECT	16	58	-0.5	contour059	Song	0	0
33	4.134	same	same	CORRECT	16	58	-0.5	contour103	Speech	0	0
5	1.315	same	same	CORRECT	16	58	-0.5	contour070	Song	0	0
55	2.565	same	same	CORRECT	16	58	-0.5	contour059	Intermediate	0	0
75	1.215	same	same	CORRECT	16	58	-0.5	contour139	Speech	0	0
13	1.192	same	same	CORRECT	16	58	-0.5	contour003	Intermediate	0	0
85	1.57	same	same	CORRECT	16	58	-0.5	contour068	Intermediate	0	0
49	1.079	same	same	CORRECT	16	58	-0.5	contour076	Intermediate	0	0
53	2.161	same	same	CORRECT	16	58	-0.5	contour073	Song	0	0
88	1.695	same	diff	INCORRECT	16	58	-0.5	contour135	Intermediate	-2.57	2.57
102	3.422	same	diff	INCORRECT	16	58	-0.5	contour130	Speech	-1.97	1.97
104	0.793	diff	same	INCORRECT	16	58	-0.5	contour130	Song	0	0
24	1.791	same	same	CORRECT	16	58	-0.5	contour171	Speech	0	0
31	2.97	same	diff	INCORRECT	16	58	-0.5	contour036	Intermediate	0	0
78	6.217	same	diff	INCORRECT	16	58	-0.5	contour151	Speech	-2.29	2.29
94	1.351	same	diff	INCORRECT	16	58	-0.5	contour047	Intermediate	2.82	2.82
39	3.132	same	same	CORRECT	16	58	-0.5	contour071	Speech	0	0
12	1.997	same	diff	INCORRECT	16	58	-0.5	contour003	Speech	-2.75	2.75
111	1.092	diff	same	INCORRECT	16	58	-0.5	contour136	Speech	0	0
16	1.787	same	same	CORRECT	16	58	-0.5	contour178	Intermediate	0	0
17	1.325	same	diff	INCORRECT	16	58	-0.5	contour178	Song	-1.61	1.61
22	2.058	same	diff	INCORRECT	16	58	-0.5	contour179	Intermediate	-2.56	2.56
9	5.906	same	same	CORRECT	16	58	-0.5	contour012	Speech	0	0
81	1.722	diff	diff	CORRECT	16	58	-0.5	contour057	Speech	-2.74	2.74
57	5.724	same	same	CORRECT	17	86	0	contour072	Speech	0	0
13	4.065	same	same	CORRECT	17	86	0	contour003	Intermediate	0	0
110	1.821	same	diff	INCORRECT	17	86	0	contour156	Song	-1.46	1.46
64	2.221	diff	diff	CORRECT	17	86	0	contour027	Intermediate	-2.84	2.84
56	3.846	same	same	CORRECT	17	86	0	contour059	Song	0	0
79	2.487	same	same	CORRECT	17	86	0	contour151	Intermediate	0	0
88	1.318	same	diff	INCORRECT	17	86	0	contour135	Intermediate	-2.57	2.57
43	1.436	diff	diff	CORRECT	17	86	0	contour009	Intermediate	-2.34	2.34
39	0.927	same	same	CORRECT	17	86	0	contour071	Speech	0	0
40	3.944	diff	diff	CORRECT	17	86	0	contour071	Intermediate	2.2	2.2
26	0.925	same	diff	INCORRECT	17	86	0	contour171	Song	-1.6	1.6
73	1.116	diff	diff	CORRECT	17	86	0	contour109	Intermediate	-1.65	1.65
59	1.437	same	same	CORRECT	17	86	0	contour072	Song	0	0
94	1.112	same	diff	INCORRECT	17	86	0	contour047	Intermediate	2.82	2.82
10	1.328	same	same	CORRECT	17	86	0	contour012	Intermediate	0	0
54	1.175	diff	diff	CORRECT	17	86	0	contour059	Speech	-1.76	1.76
11	1.694	same	diff	INCORRECT	17	86	0	contour012	Song	-1.34	1.34
72	4.41	same	same	CORRECT	17	86	0	contour109	Speech	0	0
6	2.967	diff	diff	CORRECT	17	86	0	contour075	Speech	2.67	2.67
70	1.31	diff	diff	CORRECT	17	86	0	contour174	Intermediate	1.41	1.41
96	1.038	same	diff	INCORRECT	17	86	0	contour083	Speech	-2.16	2.16
112	2.377	same	diff	INCORRECT	17	86	0	contour136	Intermediate	-3.21	3.21
41	2.104	same	same	CORRECT	17	86	0	contour071	Song	0	0
107	1.697	same	diff	INCORRECT	17	86	0	contour017	Song	3.16	3.16
91	1.38	diff	same	INCORRECT	17	86	0	contour163	Intermediate	0	0
4	0.824	same	diff	INCORRECT	17	86	0	contour070	Intermediate	1.01	1.01
47	0.76	same	same	CORRECT	17	86	0	contour044	Song	0	0
29	1.574	diff	diff	CORRECT	17	86	0	contour148	Song	1.35	1.35
5	1.173	same	same	CORRECT	17	86	0	contour070	Song	0	0
97	2.477	same	same	CORRECT	17	86	0	contour083	Intermediate	0	0
99	1.584	same	same	CORRECT	17	86	0	contour107	Speech	0	0
119	2.505	same	diff	INCORRECT	17	86	0	contour146	Song	-1.47	1.47
44	0.769	same	same	CORRECT	17	86	0	contour009	Song	0	0
89	0.908	same	same	CORRECT	17	86	0	contour135	Song	0	0
36	1.308	same	same	CORRECT	17	86	0	contour037	Speech	0	0
42	3.352	same	diff	INCORRECT	17	86	0	contour009	Speech	-3.32	3.32
63	1.343	diff	same	INCORRECT	17	86	0	contour027	Speech	0	0
16	1.258	same	same	CORRECT	17	86	0	contour178	Intermediate	0	0
8	1.173	diff	diff	CORRECT	17	86	0	contour075	Song	-4.96	4.96
109	1.393	same	diff	INCORRECT	17	86	0	contour156	Intermediate	0	0
80	0.997	diff	diff	CORRECT	17	86	0	contour151	Song	2.92	2.92
7	1.534	diff	diff	CORRECT	17	86	0	contour075	Intermediate	-5.39	5.39
86	1.712	same	diff	INCORRECT	17	86	0	contour068	Song	2.92	2.92
14	1.105	same	diff	INCORRECT	17	86	0	contour003	Song	-1.6	1.6
69	4.788	same	diff	INCORRECT	17	86	0	contour174	Speech	-2.18	2.18
33	1.393	diff	same	INCORRECT	17	86	0	contour103	Speech	0	0
50	1.164	same	same	CORRECT	17	86	0	contour076	Song	0	0
118	1.611	diff	diff	CORRECT	17	86	0	contour146	Intermediate	-2.82	2.82
65	0.9	diff	diff	CORRECT	17	86	0	contour027	Song	2.92	2.92
81	0.942	diff	diff	CORRECT	17	86	0	contour057	Speech	-2.74	2.74
87	0.885	same	same	CORRECT	17	86	0	contour135	Speech	0	0
37	0.896	same	same	CORRECT	17	86	0	contour037	Intermediate	0	0
67	0.776	diff	diff	CORRECT	17	86	0	contour106	Intermediate	1.95	1.95
115	1.422	same	diff	INCORRECT	17	86	0	contour164	Intermediate	1.43	1.43
35	1.51	same	diff	INCORRECT	17	86	0	contour103	Song	8.4	8.4
17	2.065	same	diff	INCORRECT	17	86	0	contour178	Song	-1.61	1.61
31	3.412	same	diff	INCORRECT	17	86	0	contour036	Intermediate	0	0
75	1.307	same	same	CORRECT	17	86	0	contour139	Speech	0	0
60	1.049	same	same	CORRECT	17	86	0	contour046	Speech	0	0
24	0.899	diff	same	INCORRECT	17	86	0	contour171	Speech	0	0
100	1.109	same	same	CORRECT	17	86	0	contour107	Intermediate	0	0
66	1.247	diff	same	INCORRECT	17	86	0	contour106	Speech	0	0
53	4.331	same	same	CORRECT	17	86	0	contour073	Song	0	0
101	1.107	same	diff	INCORRECT	17	86	0	contour107	Song	2.7	2.7
12	0.985	diff	diff	CORRECT	17	86	0	contour003	Speech	-2.75	2.75
48	2.392	diff	same	INCORRECT	17	86	0	contour076	Speech	0	0
46	2.242	same	same	CORRECT	17	86	0	contour044	Intermediate	0	0
55	0.691	diff	same	INCORRECT	17	86	0	contour059	Intermediate	0	0
74	2.911	diff	diff	CORRECT	17	86	0	contour109	Song	2.71	2.71
105	0.849	same	diff	INCORRECT	17	86	0	contour017	Speech	2.36	2.36
77	0.936	same	diff	INCORRECT	17	86	0	contour139	Song	-1.34	1.34
90	1.477	diff	same	INCORRECT	17	86	0	contour163	Speech	0	0
71	2.432	same	diff	INCORRECT	17	86	0	contour174	Song	-1.58	1.58
117	1.011	same	diff	INCORRECT	17	86	0	contour146	Speech	2.27	2.27
114	1.233	diff	diff	CORRECT	17	86	0	contour164	Speech	-2.08	2.08
108	1.437	same	same	CORRECT	17	86	0	contour156	Speech	0	0
103	1.749	diff	diff	CORRECT	17	86	0	contour130	Intermediate	1.39	1.39
28	1.563	same	diff	INCORRECT	17	86	0	contour148	Intermediate	2.29	2.29
84	1.229	same	same	CORRECT	17	86	0	contour068	Speech	0	0
20	1.969	same	diff	INCORRECT	17	86	0	contour064	Song	-1.33	1.33
3	0.978	same	same	CORRECT	17	86	0	contour070	Speech	0	0
2	1.16	same	same	CORRECT	17	86	0	contour185	Song	0	0
23	0.828	same	diff	INCORRECT	17	86	0	contour179	Song	3.16	3.16
92	1.503	diff	diff	CORRECT	17	86	0	contour163	Song	1.59	1.59
0	1.103	same	diff	INCORRECT	17	86	0	contour185	Speech	-1.82	1.82
27	1.46	same	same	CORRECT	17	86	0	contour148	Speech	0	0
61	1.678	same	diff	INCORRECT	17	86	0	contour046	Intermediate	-2.59	2.59
38	1.332	same	same	CORRECT	17	86	0	contour037	Song	0	0
93	1.792	same	same	CORRECT	17	86	0	contour047	Speech	0	0
95	1.512	diff	diff	CORRECT	17	86	0	contour047	Song	-1.46	1.46
1	1.025	same	same	CORRECT	17	86	0	contour185	Intermediate	0	0
30	0.765	same	same	CORRECT	17	86	0	contour036	Speech	0	0
116	0.911	diff	same	INCORRECT	17	86	0	contour164	Song	0	0
34	1.174	diff	same	INCORRECT	17	86	0	contour103	Intermediate	0	0
102	0.977	diff	diff	CORRECT	17	86	0	contour130	Speech	-1.97	1.97
83	1.524	same	same	CORRECT	17	86	0	contour057	Song	0	0
32	0.846	same	same	CORRECT	17	86	0	contour036	Song	0	0
111	0.768	same	same	CORRECT	17	86	0	contour136	Speech	0	0
78	1.96	same	diff	INCORRECT	17	86	0	contour151	Speech	-2.29	2.29
9	1.399	same	same	CORRECT	17	86	0	contour012	Speech	0	0
21	1.875	same	diff	INCORRECT	17	86	0	contour179	Speech	-3.71	3.71
25	0.881	diff	same	INCORRECT	17	86	0	contour171	Intermediate	0	0
104	0.737	same	same	CORRECT	17	86	0	contour130	Song	0	0
51	1.103	same	same	CORRECT	17	86	0	contour073	Speech	0	0
52	1.036	same	same	CORRECT	17	86	0	contour073	Intermediate	0	0
68	1.051	same	same	CORRECT	17	86	0	contour106	Song	0	0
18	1.621	same	same	CORRECT	17	86	0	contour064	Speech	0	0
113	1.819	same	diff	INCORRECT	17	86	0	contour136	Song	-1.35	1.35
49	1.462	diff	same	INCORRECT	17	86	0	contour076	Intermediate	0	0
22	1.12	same	diff	INCORRECT	17	86	0	contour179	Intermediate	-2.56	2.56
85	0.946	diff	same	INCORRECT	17	86	0	contour068	Intermediate	0	0
106	0.897	diff	diff	CORRECT	17	86	0	contour017	Intermediate	-3.27	3.27
98	1.098	same	diff	INCORRECT	17	86	0	contour083	Song	2.92	2.92
19	2.055	same	same	CORRECT	17	86	0	contour064	Intermediate	0	0
62	1.449	same	diff	INCORRECT	17	86	0	contour046	Song	-1.75	1.75
58	1.102	diff	same	INCORRECT	17	86	0	contour072	Intermediate	0	0
76	1.208	same	diff	INCORRECT	17	86	0	contour139	Intermediate	0	0
45	1.61	same	diff	INCORRECT	17	86	0	contour044	Speech	0	0
82	1.472	diff	same	INCORRECT	17	86	0	contour057	Intermediate	0	0
15	1.479	same	same	CORRECT	17	86	0	contour178	Speech	0	0
53	1.979	same	same	CORRECT	18	77	0	contour073	Song	0	0
94	2.333	same	diff	INCORRECT	18	77	0	contour047	Intermediate	2.82	2.82
92	1.397	diff	diff	CORRECT	18	77	0	contour163	Song	1.59	1.59
7	1.568	diff	diff	CORRECT	18	77	0	contour075	Intermediate	-5.39	5.39
66	6.959	same	same	CORRECT	18	77	0	contour106	Speech	0	0
82	1.898	same	same	CORRECT	18	77	0	contour057	Intermediate	0	0
65	1.075	diff	diff	CORRECT	18	77	0	contour027	Song	2.92	2.92
104	3.108	same	same	CORRECT	18	77	0	contour130	Song	0	0
30	5.135	same	same	CORRECT	18	77	0	contour036	Speech	0	0
40	3.115	same	diff	INCORRECT	18	77	0	contour071	Intermediate	2.2	2.2
100	1.842	same	same	CORRECT	18	77	0	contour107	Intermediate	0	0
16	1.508	same	same	CORRECT	18	77	0	contour178	Intermediate	0	0
41	1.471	same	same	CORRECT	18	77	0	contour071	Song	0	0
93	1.087	same	same	CORRECT	18	77	0	contour047	Speech	0	0
37	2.262	diff	same	INCORRECT	18	77	0	contour037	Intermediate	0	0
28	11.325	same	diff	INCORRECT	18	77	0	contour148	Intermediate	2.29	2.29
90	6.955	same	same	CORRECT	18	77	0	contour163	Speech	0	0
95	1.314	diff	diff	CORRECT	18	77	0	contour047	Song	-1.46	1.46
26	1.388	diff	diff	CORRECT	18	77	0	contour171	Song	-1.6	1.6
115	1.044	diff	diff	CORRECT	18	77	0	contour164	Intermediate	1.43	1.43
12	2.133	same	diff	INCORRECT	18	77	0	contour003	Speech	-2.75	2.75
80	1.057	diff	diff	CORRECT	18	77	0	contour151	Song	2.92	2.92
117	0.987	diff	diff	CORRECT	18	77	0	contour146	Speech	2.27	2.27
97	1.882	same	same	CORRECT	18	77	0	contour083	Intermediate	0	0
33	5.45	same	same	CORRECT	18	77	0	contour103	Speech	0	0
1	2.212	same	same	CORRECT	18	77	0	contour185	Intermediate	0	0
22	1.475	diff	diff	CORRECT	18	77	0	contour179	Intermediate	-2.56	2.56
60	1.666	same	same	CORRECT	18	77	0	contour046	Speech	0	0
110	1.526	same	diff	INCORRECT	18	77	0	contour156	Song	-1.46	1.46
74	1.9	same	diff	INCORRECT	18	77	0	contour109	Song	2.71	2.71
79	1.309	same	same	CORRECT	18	77	0	contour151	Intermediate	0	0
32	2.106	diff	same	INCORRECT	18	77	0	contour036	Song	0	0
51	5.96	same	same	CORRECT	18	77	0	contour073	Speech	0	0
38	1.935	same	same	CORRECT	18	77	0	contour037	Song	0	0
81	3.307	same	diff	INCORRECT	18	77	0	contour057	Speech	-2.74	2.74
72	1.675	diff	same	INCORRECT	18	77	0	contour109	Speech	0	0
114	2.76	same	diff	INCORRECT	18	77	0	contour164	Speech	-2.08	2.08
89	7.544	diff	same	INCORRECT	18	77	0	contour135	Song	0	0
88	2.197	same	diff	INCORRECT	18	77	0	contour135	Intermediate	-2.57	2.57
20	0.805	diff	diff	CORRECT	18	77	0	contour064	Song	-1.33	1.33
68	1.267	same	same	CORRECT	18	77	0	contour106	Song	0	0
15	1.374	same	same	CORRECT	18	77	0	contour178	Speech	0	0
5	4.843	same	same	CORRECT	18	77	0	contour070	Song	0	0
19	2.667	same	same	CORRECT	18	77	0	contour064	Intermediate	0	0
49	1.862	same	same	CORRECT	18	77	0	contour076	Intermediate	0	0
24	0.81	diff	same	INCORRECT	18	77	0	contour171	Speech	0	0
55	0.954	diff	same	INCORRECT	18	77	0	contour059	Intermediate	0	0
42	1.392	diff	diff	CORRECT	18	77	0	contour009	Speech	-3.32	3.32
3	1.964	same	same	CORRECT	18	77	0	contour070	Speech	0	0
105	1.119	diff	diff	CORRECT	18	77	0	contour017	Speech	2.36	2.36
87	1.831	same	same	CORRECT	18	77	0	contour135	Speech	0	0
6	1.942	same	diff	INCORRECT	18	77	0	contour075	Speech	2.67	2.67
77	1.364	same	diff	INCORRECT	18	77	0	contour139	Song	-1.34	1.34
52	1.479	same	same	CORRECT	18	77	0	contour073	Intermediate	0	0
86	1.778	diff	diff	CORRECT	18	77	0	contour068	Song	2.92	2.92
25	2.009	same	same	CORRECT	18	77	0	contour171	Intermediate	0	0
31	6.546	same	diff	INCORRECT	18	77	0	contour036	Intermediate	0	0
67	2.87	same	diff	INCORRECT	18	77	0	contour106	Intermediate	1.95	1.95
69	1.967	same	diff	INCORRECT	18	77	0	contour174	Speech	-2.18	2.18
57	1.458	same	same	CORRECT	18	77	0	contour072	Speech	0	0
17	0.972	same	diff	INCORRECT	18	77	0	contour178	Song	-1.61	1.61
102	2.355	diff	diff	CORRECT	18	77	0	contour130	Speech	-1.97	1.97
54	2.6	same	diff	INCORRECT	18	77	0	contour059	Speech	-1.76	1.76
61	0.968	same	diff	INCORRECT	18	77	0	contour046	Intermediate	-2.59	2.59
59	2.227	same	same	CORRECT	18	77	0	contour072	Song	0	0
39	1.404	diff	same	INCORRECT	18	77	0	contour071	Speech	0	0
112	2.695	same	diff	INCORRECT	18	77	0	contour136	Intermediate	-3.21	3.21
14	1.564	diff	diff	CORRECT	18	77	0	contour003	Song	-1.6	1.6
96	1.033	same	diff	INCORRECT	18	77	0	contour083	Speech	-2.16	2.16
43	2.747	diff	diff	CORRECT	18	77	0	contour009	Intermediate	-2.34	2.34
2	3.46	same	same	CORRECT	18	77	0	contour185	Song	0	0
56	1.184	diff	same	INCORRECT	18	77	0	contour059	Song	0	0
50	2.136	diff	same	INCORRECT	18	77	0	contour076	Song	0	0
85	1.232	diff	same	INCORRECT	18	77	0	contour068	Intermediate	0	0
70	0.633	diff	diff	CORRECT	18	77	0	contour174	Intermediate	1.41	1.41
111	1.506	same	same	CORRECT	18	77	0	contour136	Speech	0	0
9	1.539	same	same	CORRECT	18	77	0	contour012	Speech	0	0
118	1.629	same	diff	INCORRECT	18	77	0	contour146	Intermediate	-2.82	2.82
21	14.237	same	diff	INCORRECT	18	77	0	contour179	Speech	-3.71	3.71
13	2.22	same	same	CORRECT	18	77	0	contour003	Intermediate	0	0
35	1.806	same	diff	INCORRECT	18	77	0	contour103	Song	8.4	8.4
119	1.121	same	diff	INCORRECT	18	77	0	contour146	Song	-1.47	1.47
62	2.733	diff	diff	CORRECT	18	77	0	contour046	Song	-1.75	1.75
44	2.709	same	same	CORRECT	18	77	0	contour009	Song	0	0
63	0.701	diff	same	INCORRECT	18	77	0	contour027	Speech	0	0
116	1.263	same	same	CORRECT	18	77	0	contour164	Song	0	0
10	2.449	same	same	CORRECT	18	77	0	contour012	Intermediate	0	0
103	1.865	same	diff	INCORRECT	18	77	0	contour130	Intermediate	1.39	1.39
106	2.866	same	diff	INCORRECT	18	77	0	contour017	Intermediate	-3.27	3.27
113	1.999	same	diff	INCORRECT	18	77	0	contour136	Song	-1.35	1.35
98	1.092	diff	diff	CORRECT	18	77	0	contour083	Song	2.92	2.92
91	1.293	same	same	CORRECT	18	77	0	contour163	Intermediate	0	0
84	1.553	same	same	CORRECT	18	77	0	contour068	Speech	0	0
64	2.756	same	diff	INCORRECT	18	77	0	contour027	Intermediate	-2.84	2.84
73	1.469	same	diff	INCORRECT	18	77	0	contour109	Intermediate	-1.65	1.65
4	1.668	same	diff	INCORRECT	18	77	0	contour070	Intermediate	1.01	1.01
27	1.946	same	same	CORRECT	18	77	0	contour148	Speech	0	0
83	1.729	diff	same	INCORRECT	18	77	0	contour057	Song	0	0
36	1.96	same	same	CORRECT	18	77	0	contour037	Speech	0	0
108	0.744	same	same	CORRECT	18	77	0	contour156	Speech	0	0
101	2.758	same	diff	INCORRECT	18	77	0	contour107	Song	2.7	2.7
99	1.053	same	same	CORRECT	18	77	0	contour107	Speech	0	0
46	2.035	diff	same	INCORRECT	18	77	0	contour044	Intermediate	0	0
23	2.617	diff	diff	CORRECT	18	77	0	contour179	Song	3.16	3.16
75	1.508	same	same	CORRECT	18	77	0	contour139	Speech	0	0
71	4.092	same	diff	INCORRECT	18	77	0	contour174	Song	-1.58	1.58
109	0.932	diff	diff	CORRECT	18	77	0	contour156	Intermediate	0	0
34	1.898	same	same	CORRECT	18	77	0	contour103	Intermediate	0	0
8	1.195	same	diff	INCORRECT	18	77	0	contour075	Song	-4.96	4.96
76	3.344	same	diff	INCORRECT	18	77	0	contour139	Intermediate	0	0
47	2.092	diff	same	INCORRECT	18	77	0	contour044	Song	0	0
48	2.222	diff	same	INCORRECT	18	77	0	contour076	Speech	0	0
18	2.388	same	same	CORRECT	18	77	0	contour064	Speech	0	0
11	5.06	same	diff	INCORRECT	18	77	0	contour012	Song	-1.34	1.34
78	1.761	same	diff	INCORRECT	18	77	0	contour151	Speech	-2.29	2.29
107	2.921	diff	diff	CORRECT	18	77	0	contour017	Song	3.16	3.16
45	1.662	same	diff	INCORRECT	18	77	0	contour044	Speech	0	0
0	0.89	diff	diff	CORRECT	18	77	0	contour185	Speech	-1.82	1.82
29	0.743	diff	diff	CORRECT	18	77	0	contour148	Song	1.35	1.35
58	1.867	same	same	CORRECT	18	77	0	contour072	Intermediate	0	0
16	0.951	same	same	CORRECT	19	49	-0.166667	contour178	Intermediate	0	0
39	1.893	same	same	CORRECT	19	49	-0.166667	contour071	Speech	0	0
7	1.66	same	diff	INCORRECT	19	49	-0.166667	contour075	Intermediate	-5.39	5.39
80	0.959	same	diff	INCORRECT	19	49	-0.166667	contour151	Song	2.92	2.92
53	0.774	same	same	CORRECT	19	49	-0.166667	contour073	Song	0	0
54	0.846	diff	diff	CORRECT	19	49	-0.166667	contour059	Speech	-1.76	1.76
13	0.928	same	same	CORRECT	19	49	-0.166667	contour003	Intermediate	0	0
75	1.329	diff	same	INCORRECT	19	49	-0.166667	contour139	Speech	0	0
0	0.957	same	diff	INCORRECT	19	49	-0.166667	contour185	Speech	-1.82	1.82
63	1.276	diff	same	INCORRECT	19	49	-0.166667	contour027	Speech	0	0
43	1.102	diff	diff	CORRECT	19	49	-0.166667	contour009	Intermediate	-2.34	2.34
10	1.369	same	same	CORRECT	19	49	-0.166667	contour012	Intermediate	0	0
77	1.156	same	diff	INCORRECT	19	49	-0.166667	contour139	Song	-1.34	1.34
4	0.892	same	diff	INCORRECT	19	49	-0.166667	contour070	Intermediate	1.01	1.01
35	0.902	same	diff	INCORRECT	19	49	-0.166667	contour103	Song	8.4	8.4
84	1.78	same	same	CORRECT	19	49	-0.166667	contour068	Speech	0	0
37	1.298	diff	same	INCORRECT	19	49	-0.166667	contour037	Intermediate	0	0
110	0.954	same	diff	INCORRECT	19	49	-0.166667	contour156	Song	-1.46	1.46
12	1.289	diff	diff	CORRECT	19	49	-0.166667	contour003	Speech	-2.75	2.75
91	1.104	diff	same	INCORRECT	19	49	-0.166667	contour163	Intermediate	0	0
9	1.051	same	same	CORRECT	19	49	-0.166667	contour012	Speech	0	0
117	0.842	diff	diff	CORRECT	19	49	-0.166667	contour146	Speech	2.27	2.27
44	1.541	same	same	CORRECT	19	49	-0.166667	contour009	Song	0	0
106	1.173	diff	diff	CORRECT	19	49	-0.166667	contour017	Intermediate	-3.27	3.27
72	1.66	same	same	CORRECT	19	49	-0.166667	contour109	Speech	0	0
49	1.225	same	same	CORRECT	19	49	-0.166667	contour076	Intermediate	0	0
92	1.79	same	diff	INCORRECT	19	49	-0.166667	contour163	Song	1.59	1.59
56	0.934	same	same	CORRECT	19	49	-0.166667	contour059	Song	0	0
96	1.791	diff	diff	CORRECT	19	49	-0.166667	contour083	Speech	-2.16	2.16
64	1.707	same	diff	INCORRECT	19	49	-0.166667	contour027	Intermediate	-2.84	2.84
95	1.509	same	diff	INCORRECT	19	49	-0.166667	contour047	Song	-1.46	1.46
115	1.141	same	diff	INCORRECT	19	49	-0.166667	contour164	Intermediate	1.43	1.43
119	1.03	same	diff	INCORRECT	19	49	-0.166667	contour146	Song	-1.47	1.47
107	1.167	same	diff	INCORRECT	19	49	-0.166667	contour017	Song	3.16	3.16
116	1.101	same	same	CORRECT	19	49	-0.166667	contour164	Song	0	0
93	1.04	same	same	CORRECT	19	49	-0.166667	contour047	Speech	0	0
36	1.997	diff	same	INCORRECT	19	49	-0.166667	contour037	Speech	0	0
34	1.278	same	same	CORRECT	19	49	-0.166667	contour103	Intermediate	0	0
111	1.014	same	same	CORRECT	19	49	-0.166667	contour136	Speech	0	0
[truncated: 2,441 more rows]

## Sheet: Study 3
Subject	Trial_index	Reaction_Time	Response_string	Correct_response	Correctness	Musicality	contour	variant	deviation	deviation_abs
1	38	0,923	same	diff	INCORRECT	33	contour150	Song	-4.73544	4.73544
1	96	1,881	same	diff	INCORRECT	33	contour049	Speech	1.4765	1.4765
1	93	1,666	same	diff	INCORRECT	33	contour003	Speech	4.25884	4.25884
1	1	3,105	diff	diff	CORRECT	33	contour182	Speech	5.8125	5.8125
1	74	1,387	diff	diff	CORRECT	33	contour010	Intermediate	-5.39966	5.39966
1	57	2,063	same	same	CORRECT	33	contour095	Song	0	0
1	32	13,388	diff	diff	CORRECT	33	contour168	Speech	3.1411	3.1411
1	98	1,033	same	same	CORRECT	33	contour047	Song	0	0
1	51	1,369	same	same	CORRECT	33	contour167	Speech	0	0
1	44	1,242	diff	diff	CORRECT	33	contour171	Speech	2.51472	2.51472
1	48	0,997	same	diff	INCORRECT	33	contour130	Speech	5.6717	5.6717
1	113	2,06	same	same	CORRECT	33	contour032	Song	0	0
1	36	1,335	same	same	CORRECT	33	contour200	Song	0	0
1	50	0,826	same	same	CORRECT	33	contour010	Speech	0	0
1	40	2,131	same	diff	INCORRECT	33	contour004	Intermediate	3.95277	3.95277
1	71	5,728	diff	diff	CORRECT	33	contour167	Intermediate	-3.43158	3.43158
1	104	1,872	diff	diff	CORRECT	33	contour053	Intermediate	1.81508	1.81508
1	61	1,151	same	same	CORRECT	33	contour037	Intermediate	0	0
1	90	1,176	same	diff	INCORRECT	33	contour155	Intermediate	1.81332	1.81332
1	68	0,961	same	diff	INCORRECT	33	contour049	Intermediate	4.54933	4.54933
1	3	1,949	same	same	CORRECT	33	contour078	Speech	0	0
1	63	2,952	same	diff	INCORRECT	33	contour164	Speech	2.48791	2.48791
1	60	0,965	same	same	CORRECT	33	contour095	Intermediate	0	0
1	70	1,741	same	same	CORRECT	33	contour163	Speech	0	0
1	73	1,013	same	same	CORRECT	33	contour077	Song	0	0
1	85	4,333	same	diff	INCORRECT	33	contour003	Intermediate	4.60981	4.60981
1	114	1,047	diff	diff	CORRECT	33	contour035	Speech	-5.26655	5.26655
1	115	1,73	same	same	CORRECT	33	contour106	Speech	0	0
1	4	0,828	same	diff	INCORRECT	33	contour182	Song	-1.22359	1.22359
1	20	0,581	same	same	CORRECT	33	contour114	Intermediate	0	0
1	30	1,221	same	diff	INCORRECT	33	contour039	Song	2.75129	2.75129
1	43	0,933	same	diff	INCORRECT	33	contour078	Song	-5.96438	5.96438
1	91	1,239	diff	diff	CORRECT	33	contour174	Song	1.10675	1.10675
1	12	1,228	diff	diff	CORRECT	33	contour017	Song	4.42381	4.42381
1	13	2,363	diff	same	INCORRECT	33	contour025	Speech	0	0
1	80	1,748	diff	diff	CORRECT	33	contour189	Song	5.26882	5.26882
1	92	1,43	same	diff	INCORRECT	33	contour114	Song	3.57851	3.57851
1	8	0,985	same	diff	INCORRECT	33	contour165	Speech	-1.46132	1.46132
1	89	1,537	same	diff	INCORRECT	33	contour152	Song	3.95252	3.95252
1	105	1,253	same	same	CORRECT	33	contour165	Intermediate	0	0
1	88	1,301	diff	diff	CORRECT	33	contour077	Intermediate	5.65269	5.65269
1	116	0,904	same	diff	INCORRECT	33	contour164	Song	3.74949	3.74949
1	15	0,913	same	same	CORRECT	33	contour106	Song	0	0
1	118	0,878	same	same	CORRECT	33	contour182	Intermediate	0	0
1	64	0,987	diff	same	INCORRECT	33	contour130	Intermediate	0	0
1	78	1,098	same	same	CORRECT	33	contour165	Song	0	0
1	99	1,159	same	diff	INCORRECT	33	contour025	Intermediate	2.07753	2.07753
1	65	1,688	same	diff	INCORRECT	33	contour153	Intermediate	3.77205	3.77205
1	59	1,829	diff	same	INCORRECT	33	contour075	Speech	0	0
1	84	0,994	same	diff	INCORRECT	33	contour047	Speech	3.64892	3.64892
1	110	1,216	same	same	CORRECT	33	contour161	Intermediate	0	0
1	62	1,899	diff	same	INCORRECT	33	contour162	Song	0	0
1	94	0,974	same	same	CORRECT	33	contour016	Song	0	0
1	100	1,102	same	same	CORRECT	33	contour035	Song	0	0
1	25	1,302	same	diff	INCORRECT	33	contour038	Song	-2.87033	2.87033
1	42	1,178	same	diff	INCORRECT	33	contour025	Song	1.98477	1.98477
1	28	0,971	diff	same	INCORRECT	33	contour163	Song	0	0
1	55	0,768	same	same	CORRECT	33	contour075	Intermediate	0	0
1	22	1,061	same	same	CORRECT	33	contour114	Speech	0	0
1	56	1,375	diff	diff	CORRECT	33	contour155	Song	-5.24018	5.24018
1	106	1,526	same	diff	INCORRECT	33	contour032	Intermediate	-2.79765	2.79765
1	97	1,329	same	diff	INCORRECT	33	contour003	Song	4.82641	4.82641
1	87	0,76	same	same	CORRECT	33	contour200	Intermediate	0	0
1	83	0,921	same	same	CORRECT	33	contour171	Intermediate	0	0
1	11	2,971	diff	diff	CORRECT	33	contour064	Speech	-2.37355	2.37355
1	46	0,843	same	diff	INCORRECT	33	contour189	Intermediate	1.37025	1.37025
1	66	0,909	same	same	CORRECT	33	contour153	Speech	0	0
1	45	0,946	same	diff	INCORRECT	33	contour053	Speech	1.20203	1.20203
1	26	1,012	same	same	CORRECT	33	contour200	Speech	0	0
1	0	0,658	same	same	CORRECT	33	contour171	Song	0	0
1	86	1,171	diff	diff	CORRECT	33	contour047	Intermediate	5.52934	5.52934
1	67	1,767	same	diff	INCORRECT	33	contour010	Song	1.88078	1.88078
1	47	1,533	same	same	CORRECT	33	contour150	Intermediate	0	0
1	16	1,441	diff	same	INCORRECT	33	contour152	Intermediate	0	0
1	34	0,877	diff	diff	CORRECT	33	contour150	Speech	-4.83777	4.83777
1	24	0,65	same	same	CORRECT	33	contour017	Speech	0	0
1	117	0,87	same	same	CORRECT	33	contour161	Speech	0	0
1	82	1,106	diff	diff	CORRECT	33	contour155	Speech	-3.07571	3.07571
1	109	0,814	same	same	CORRECT	33	contour037	Song	0	0
1	49	1,145	same	same	CORRECT	33	contour011	Song	0	0
1	41	1,176	same	diff	INCORRECT	33	contour189	Speech	-1.93467	1.93467
1	35	0,99	same	diff	INCORRECT	33	contour077	Speech	5.30815	5.30815
1	27	1,114	diff	diff	CORRECT	33	contour152	Speech	5.67649	5.67649
1	77	0,912	diff	diff	CORRECT	33	contour064	Intermediate	-5.25313	5.25313
1	75	0,962	same	same	CORRECT	33	contour167	Song	0	0
1	52	0,93	same	diff	INCORRECT	33	contour153	Song	1.47389	1.47389
1	29	2,693	same	diff	INCORRECT	33	contour123	Song	-2.82473	2.82473
1	79	1,87	same	same	CORRECT	33	contour162	Intermediate	0	0
1	95	0,839	same	diff	INCORRECT	33	contour039	Intermediate	-1.88056	1.88056
1	33	1,076	diff	diff	CORRECT	33	contour035	Intermediate	1.49424	1.49424
1	21	1,169	same	same	CORRECT	33	contour064	Song	0	0
1	6	0,84	same	same	CORRECT	33	contour004	Song	0	0
1	111	3,824	diff	same	INCORRECT	33	contour032	Speech	0	0
1	2	0,721	same	same	CORRECT	33	contour168	Song	0	0
1	112	0,971	diff	diff	CORRECT	33	contour011	Intermediate	-4.94278	4.94278
1	108	0,87	same	diff	INCORRECT	33	contour049	Song	2.0279	2.0279
1	14	4,666	same	same	CORRECT	33	contour106	Intermediate	0	0
1	39	0,705	same	same	CORRECT	33	contour075	Song	0	0
1	101	2,65	diff	same	INCORRECT	33	contour017	Intermediate	0	0
1	72	0,838	same	diff	INCORRECT	33	contour161	Song	1.99204	1.99204
1	9	1,446	diff	diff	CORRECT	33	contour038	Speech	4.06729	4.06729
1	10	0,695	same	diff	INCORRECT	33	contour174	Speech	4.26269	4.26269
1	18	0,735	same	diff	INCORRECT	33	contour095	Speech	-1.59891	1.59891
1	5	1,465	same	diff	INCORRECT	33	contour163	Intermediate	1.38397	1.38397
1	53	1,615	same	same	CORRECT	33	contour123	Speech	0	0
1	103	4,945	same	same	CORRECT	33	contour004	Speech	0	0
1	76	0,912	same	same	CORRECT	33	contour011	Speech	0	0
1	23	0,727	same	same	CORRECT	33	contour174	Intermediate	0	0
1	69	3,16	diff	diff	CORRECT	33	contour130	Song	3.34162	3.34162
1	81	0,764	same	same	CORRECT	33	contour053	Song	0	0
1	31	0,69	same	same	CORRECT	33	contour038	Intermediate	0	0
1	58	0,9	same	same	CORRECT	33	contour078	Intermediate	0	0
1	19	0,867	same	same	CORRECT	33	contour037	Speech	0	0
1	102	0,801	diff	same	INCORRECT	33	contour162	Speech	0	0
1	17	0,964	same	same	CORRECT	33	contour039	Speech	0	0
1	107	0,868	diff	diff	CORRECT	33	contour168	Intermediate	1.46788	1.46788
1	119	0,654	same	same	CORRECT	33	contour123	Intermediate	0	0
1	7	1,22	same	same	CORRECT	33	contour164	Intermediate	0	0
1	54	1,641	same	same	CORRECT	33	contour016	Speech	0	0
1	37	1,023	same	diff	INCORRECT	33	contour016	Intermediate	-2.04804	2.04804
2	52	1,737	same	same	CORRECT	64	contour106	Intermediate	0	0
2	38	1,355	diff	same	INCORRECT	64	contour032	Speech	0	0
2	115	1,376	diff	diff	CORRECT	64	contour152	Intermediate	-5.55534	5.55534
2	89	4,365	diff	same	INCORRECT	64	contour133	Intermediate	0	0
2	30	1,269	same	diff	INCORRECT	64	contour083	Intermediate	-2.83781	2.83781
2	3	1,549	same	same	CORRECT	64	contour095	Speech	0	0
2	61	2,506	diff	diff	CORRECT	64	contour010	Song	1.88078	1.88078
2	19	2,16	same	same	CORRECT	64	contour167	Song	0	0
2	25	1,382	same	diff	INCORRECT	64	contour049	Song	2.0279	2.0279
2	47	1,096	diff	diff	CORRECT	64	contour042	Speech	3.02936	3.02936
2	78	1,514	diff	same	INCORRECT	64	contour123	Speech	0	0
2	33	1,894	same	diff	INCORRECT	64	contour016	Intermediate	-2.04804	2.04804
2	100	3,305	same	diff	INCORRECT	64	contour171	Song	-5.73783	5.73783
2	17	1,76	same	diff	INCORRECT	64	contour025	Speech	-4.50184	4.50184
2	36	1,916	same	diff	INCORRECT	64	contour003	Song	4.82641	4.82641
2	118	2,054	same	diff	INCORRECT	64	contour167	Speech	3.67715	3.67715
2	70	1,424	same	same	CORRECT	64	contour078	Song	0	0
2	15	2,216	same	same	CORRECT	64	contour016	Speech	0	0
2	85	2,224	diff	diff	CORRECT	64	contour011	Intermediate	-4.94278	4.94278
2	60	1,518	diff	diff	CORRECT	64	contour182	Song	-1.22359	1.22359
2	53	2,545	diff	diff	CORRECT	64	contour123	Song	-2.82473	2.82473
2	48	1,289	same	same	CORRECT	64	contour078	Intermediate	0	0
2	83	1,391	same	diff	INCORRECT	64	contour075	Speech	-2.1487	2.1487
2	2	4,081	same	diff	INCORRECT	64	contour035	Song	1.98272	1.98272
2	63	1,48	same	same	CORRECT	64	contour038	Song	0	0
2	114	1,586	same	diff	INCORRECT	64	contour075	Song	-2.69624	2.69624
2	27	4,999	diff	diff	CORRECT	64	contour137	Speech	4.0314	4.0314
2	112	1,817	diff	diff	CORRECT	64	contour168	Speech	3.1411	3.1411
2	26	1,679	same	diff	INCORRECT	64	contour011	Song	-4.46781	4.46781
2	59	2,313	same	same	CORRECT	64	contour011	Speech	0	0
2	24	3,156	diff	diff	CORRECT	64	contour152	Song	3.95252	3.95252
2	32	1,835	same	same	CORRECT	64	contour077	Song	0	0
2	7	1,401	diff	same	INCORRECT	64	contour161	Song	0	0
2	108	1,773	diff	diff	CORRECT	64	contour150	Song	-4.73544	4.73544
2	31	1,269	same	same	CORRECT	64	contour171	Intermediate	0	0
2	79	1,392	diff	same	INCORRECT	64	contour064	Speech	0	0
2	92	0,984	same	diff	INCORRECT	64	contour155	Song	-5.24018	5.24018
2	54	1,178	same	same	CORRECT	64	contour155	Speech	0	0
2	99	1,765	same	same	CORRECT	64	contour153	Song	0	0
2	97	2,337	diff	diff	CORRECT	64	contour200	Speech	1.98524	1.98524
2	116	1,274	same	diff	INCORRECT	64	contour099	Intermediate	2.83506	2.83506
2	20	1,771	same	same	CORRECT	64	contour004	Song	0	0
2	16	1,623	diff	diff	CORRECT	64	contour017	Intermediate	-1.08046	1.08046
2	71	1,511	same	same	CORRECT	64	contour200	Intermediate	0	0
2	119	1,578	same	same	CORRECT	64	contour042	Song	0	0
2	81	1,242	diff	diff	CORRECT	64	contour133	Speech	4.13349	4.13349
2	82	1,392	diff	same	INCORRECT	64	contour161	Speech	0	0
2	104	3,508	diff	diff	CORRECT	64	contour161	Intermediate	-2.79127	2.79127
2	10	1,704	same	diff	INCORRECT	64	contour106	Song	1.27951	1.27951
2	90	1,958	same	same	CORRECT	64	contour077	Speech	0	0
2	66	3,73	same	same	CORRECT	64	contour075	Intermediate	0	0
2	88	1,572	diff	diff	CORRECT	64	contour123	Intermediate	-3.93938	3.93938
2	28	1,506	same	same	CORRECT	64	contour077	Intermediate	0	0
2	77	2,45	same	diff	INCORRECT	64	contour047	Speech	3.64892	3.64892
2	106	1,916	same	same	CORRECT	64	contour165	Song	0	0
2	13	2,674	same	diff	INCORRECT	64	contour114	Song	3.57851	3.57851
2	35	3,16	diff	same	INCORRECT	64	contour153	Speech	0	0
2	45	1,258	same	same	CORRECT	64	contour164	Speech	0	0
2	65	1,477	same	same	CORRECT	64	contour032	Song	0	0
2	57	1,131	diff	diff	CORRECT	64	contour155	Intermediate	1.81332	1.81332
2	40	1,962	diff	diff	CORRECT	64	contour153	Intermediate	3.77205	3.77205
2	101	1,989	same	same	CORRECT	64	contour049	Intermediate	0	0
2	0	1,523	diff	same	INCORRECT	64	contour174	Song	0	0
2	46	2,022	same	same	CORRECT	64	contour114	Intermediate	0	0
2	29	1,583	diff	same	INCORRECT	64	contour095	Intermediate	0	0
2	43	1,777	same	diff	INCORRECT	64	contour038	Intermediate	2.06174	2.06174
2	69	2,367	diff	same	INCORRECT	64	contour035	Intermediate	0	0
2	67	2,838	same	same	CORRECT	64	contour174	Intermediate	0	0
2	62	1,038	same	same	CORRECT	64	contour017	Song	0	0
2	74	4,254	same	same	CORRECT	64	contour038	Speech	0	0
2	51	1,785	diff	diff	CORRECT	64	contour003	Speech	4.25884	4.25884
2	55	6,369	same	diff	INCORRECT	64	contour064	Intermediate	-5.25313	5.25313
2	113	2,582	same	diff	INCORRECT	64	contour017	Speech	4.43206	4.43206
2	110	1,925	diff	diff	CORRECT	64	contour167	Intermediate	-3.43158	3.43158
2	94	1,219	diff	diff	CORRECT	64	contour095	Song	2.67127	2.67127
2	68	1,427	diff	diff	CORRECT	64	contour004	Intermediate	3.95277	3.95277
2	37	1,764	same	same	CORRECT	64	contour168	Intermediate	0	0
2	12	2,074	diff	diff	CORRECT	64	contour003	Intermediate	4.60981	4.60981
2	14	1,445	same	diff	INCORRECT	64	contour106	Speech	-2.1815	2.1815
2	44	1,345	diff	same	INCORRECT	64	contour171	Speech	0	0
2	41	1,422	diff	same	INCORRECT	64	contour165	Intermediate	0	0
2	39	1,929	diff	diff	CORRECT	64	contour200	Song	-4.76772	4.76772
2	96	2,52	same	diff	INCORRECT	64	contour152	Speech	5.67649	5.67649
2	21	2,406	same	diff	INCORRECT	64	contour083	Speech	-1.4467	1.4467
2	42	2,248	diff	same	INCORRECT	64	contour182	Speech	0	0
2	95	1,851	same	same	CORRECT	64	contour137	Intermediate	0	0
2	9	1,272	same	same	CORRECT	64	contour025	Intermediate	0	0
2	109	2,478	same	diff	INCORRECT	64	contour047	Intermediate	5.52934	5.52934
2	84	1,667	same	same	CORRECT	64	contour174	Speech	0	0
2	86	1,704	same	same	CORRECT	64	contour163	Song	0	0
2	111	2,285	diff	diff	CORRECT	64	contour010	Intermediate	-5.39966	5.39966
2	50	1,757	same	same	CORRECT	64	contour168	Song	0	0
2	8	1,462	same	same	CORRECT	64	contour164	Song	0	0
2	56	1,653	diff	diff	CORRECT	64	contour150	Speech	-4.83777	4.83777
2	34	2,47	same	same	CORRECT	64	contour165	Speech	0	0
2	105	3,165	diff	diff	CORRECT	64	contour099	Speech	-3.88002	3.88002
2	64	2,362	diff	diff	CORRECT	64	contour047	Song	2.13091	2.13091
2	117	1,733	diff	diff	CORRECT	64	contour182	Intermediate	-5.52258	5.52258
2	6	1,446	same	diff	INCORRECT	64	contour163	Speech	2.18061	2.18061
2	72	1,838	diff	diff	CORRECT	64	contour064	Song	-5.2574	5.2574
2	1	3,828	diff	diff	CORRECT	64	contour163	Intermediate	1.38397	1.38397
2	107	1,19	same	diff	INCORRECT	64	contour078	Speech	4.01977	4.01977
2	75	0,921	same	same	CORRECT	64	contour025	Song	0	0
2	23	1,256	diff	diff	CORRECT	64	contour039	Song	2.75129	2.75129
2	102	2,073	diff	same	INCORRECT	64	contour039	Intermediate	0	0
2	73	2,073	diff	same	INCORRECT	64	contour042	Intermediate	0	0
2	11	1,416	diff	diff	CORRECT	64	contour035	Speech	-5.26655	5.26655
2	58	1,202	same	same	CORRECT	64	contour039	Speech	0	0
2	22	2,664	same	diff	INCORRECT	64	contour083	Song	2.21799	2.21799
2	80	2,447	same	same	CORRECT	64	contour010	Speech	0	0
2	93	2,061	diff	same	INCORRECT	64	contour099	Song	0	0
2	18	2,775	same	same	CORRECT	64	contour137	Song	0	0
2	5	1,836	diff	same	INCORRECT	64	contour150	Intermediate	0	0
2	87	1,706	diff	same	INCORRECT	64	contour133	Song	0	0
2	49	6,829	same	same	CORRECT	64	contour049	Speech	0	0
2	76	1,726	diff	diff	CORRECT	64	contour114	Speech	-1.52123	1.52123
2	91	2,362	same	same	CORRECT	64	contour016	Song	0	0
2	4	2,688	same	same	CORRECT	64	contour164	Intermediate	0	0
2	103	1,303	diff	diff	CORRECT	64	contour032	Intermediate	-2.79765	2.79765
2	98	1,537	diff	same	INCORRECT	64	contour004	Speech	0	0
3	9	1,049	same	same	CORRECT	86	contour167	Intermediate	0	0
3	119	1,114	diff	diff	CORRECT	86	contour150	Speech	-4.83777	4.83777
3	117	1,05	same	same	CORRECT	86	contour099	Speech	0	0
3	50	0,808	diff	diff	CORRECT	86	contour161	Song	1.99204	1.99204
3	45	1,002	same	same	CORRECT	86	contour123	Speech	0	0
3	100	0,946	diff	diff	CORRECT	86	contour130	Intermediate	5.54485	5.54485
3	36	1,398	same	same	CORRECT	86	contour167	Song	0	0
3	25	1,132	diff	diff	CORRECT	86	contour133	Song	4.57916	4.57916
3	2	1,052	diff	diff	CORRECT	86	contour038	Speech	4.06729	4.06729
3	65	1,417	same	diff	INCORRECT	86	contour017	Intermediate	-1.08046	1.08046
3	30	2,068	same	same	CORRECT	86	contour123	Intermediate	0	0
3	66	1,205	same	same	CORRECT	86	contour064	Speech	0	0
3	54	1,225	diff	diff	CORRECT	86	contour189	Intermediate	1.37025	1.37025
3	52	0,754	diff	diff	CORRECT	86	contour042	Song	2.86156	2.86156
3	27	1,603	same	same	CORRECT	86	contour114	Speech	0	0
3	97	2,512	same	same	CORRECT	86	contour114	Intermediate	0	0
3	102	0,883	same	same	CORRECT	86	contour003	Song	0	0
3	35	1,068	diff	diff	CORRECT	86	contour153	Speech	3.67553	3.67553
3	70	1,752	same	same	CORRECT	86	contour200	Intermediate	0	0
3	92	3,11	same	diff	INCORRECT	86	contour095	Speech	-1.59891	1.59891
3	43	0,651	diff	diff	CORRECT	86	contour162	Intermediate	-2.75832	2.75832
3	38	0,93	diff	diff	CORRECT	86	contour025	Song	1.98477	1.98477
3	6	0,862	same	same	CORRECT	86	contour039	Intermediate	0	0
3	90	0,973	diff	diff	CORRECT	86	contour053	Song	-2.40718	2.40718
3	16	2,099	same	same	CORRECT	86	contour152	Song	0	0
3	101	0,52	diff	diff	CORRECT	86	contour182	Speech	5.8125	5.8125
3	57	1,966	same	same	CORRECT	86	contour035	Song	0	0
3	40	0,738	diff	diff	CORRECT	86	contour168	Speech	3.1411	3.1411
3	77	0,987	same	same	CORRECT	86	contour168	Song	0	0
3	44	1,132	diff	diff	CORRECT	86	contour133	Intermediate	3.14672	3.14672
3	13	1,195	same	same	CORRECT	86	contour016	Intermediate	0	0
3	14	0,802	same	same	CORRECT	86	contour137	Intermediate	0	0
3	11	0,978	diff	diff	CORRECT	86	contour017	Speech	4.43206	4.43206
3	86	0,685	same	diff	INCORRECT	86	contour035	Intermediate	1.49424	1.49424
3	79	0,915	same	same	CORRECT	86	contour153	Intermediate	0	0
3	19	0,953	same	diff	INCORRECT	86	contour155	Intermediate	1.81332	1.81332
3	74	0,973	same	diff	INCORRECT	86	contour150	Intermediate	-2.4645	2.4645
3	5	1,177	same	same	CORRECT	86	contour083	Song	0	0
3	53	0,734	diff	diff	CORRECT	86	contour064	Song	-5.2574	5.2574
3	63	0,756	diff	diff	CORRECT	86	contour004	Intermediate	3.95277	3.95277
3	39	0,929	same	same	CORRECT	86	contour130	Song	0	0
3	23	0,922	same	same	CORRECT	86	contour165	Song	0	0
3	56	1,115	diff	same	INCORRECT	86	contour053	Intermediate	0	0
3	24	1,067	same	same	CORRECT	86	contour189	Speech	0	0
3	103	0,904	diff	diff	CORRECT	86	contour162	Speech	5.59484	5.59484
3	4	0,929	same	diff	INCORRECT	86	contour032	Intermediate	-2.79765	2.79765
3	31	0,605	same	diff	INCORRECT	86	contour011	Speech	1.34502	1.34502
3	60	1,076	diff	diff	CORRECT	86	contour099	Song	-3.16516	3.16516
3	26	0,875	same	same	CORRECT	86	contour032	Speech	0	0
3	68	2,22	same	same	CORRECT	86	contour155	Song	0	0
3	69	0,713	same	same	CORRECT	86	contour161	Speech	0	0
3	105	0,753	same	same	CORRECT	86	contour025	Speech	0	0
3	46	1,367	diff	diff	CORRECT	86	contour174	Intermediate	-3.7986	3.7986
3	8	0,793	same	same	CORRECT	86	contour004	Song	0	0
3	62	0,824	same	same	CORRECT	86	contour017	Song	0	0
3	110	1,122	same	same	CORRECT	86	contour025	Intermediate	0	0
3	73	0,734	same	same	CORRECT	86	contour162	Song	0	0
3	72	1,539	diff	diff	CORRECT	86	contour042	Intermediate	-2.78707	2.78707
3	47	0,713	diff	diff	CORRECT	86	contour039	Speech	-3.87441	3.87441
3	3	0,654	diff	diff	CORRECT	86	contour137	Speech	4.0314	4.0314
3	94	0,936	diff	diff	CORRECT	86	contour165	Speech	-1.46132	1.46132
3	37	0,797	same	same	CORRECT	86	contour049	Intermediate	0	0
3	32	0,901	same	same	CORRECT	86	contour182	Song	0	0
3	64	0,746	diff	diff	CORRECT	86	contour053	Speech	1.20203	1.20203
3	51	0,966	same	same	CORRECT	86	contour016	Song	0	0
3	48	1,292	same	same	CORRECT	86	contour049	Speech	0	0
3	95	0,749	same	same	CORRECT	86	contour047	Speech	0	0
3	28	0,945	diff	diff	CORRECT	86	contour200	Song	-4.76772	4.76772
3	61	0,989	same	diff	INCORRECT	86	contour130	Speech	5.6717	5.6717
3	116	1,462	diff	diff	CORRECT	86	contour078	Intermediate	-5.31024	5.31024
3	83	0,842	same	same	CORRECT	86	contour039	Song	0	0
3	78	0,898	same	same	CORRECT	86	contour075	Song	0	0
3	118	0,648	diff	diff	CORRECT	86	contour189	Song	5.26882	5.26882
3	34	0,735	diff	diff	CORRECT	86	contour083	Intermediate	-2.83781	2.83781
3	89	1,166	same	same	CORRECT	86	contour011	Song	0	0
3	107	0,624	same	same	CORRECT	86	contour165	Intermediate	0	0
3	87	0,594	diff	diff	CORRECT	86	contour003	Intermediate	4.60981	4.60981
3	99	0,695	same	same	CORRECT	86	contour011	Intermediate	0	0
3	98	0,705	diff	diff	CORRECT	86	contour035	Speech	-5.26655	5.26655
3	10	2,703	diff	diff	CORRECT	86	contour153	Song	1.47389	1.47389
3	29	0,863	diff	diff	CORRECT	86	contour038	Song	-2.87033	2.87033
3	76	1,191	same	same	CORRECT	86	contour200	Speech	0	0
3	82	0,827	same	same	CORRECT	86	contour161	Intermediate	0	0
3	49	3,148	same	same	CORRECT	86	contour083	Speech	0	0
3	104	0,766	same	same	CORRECT	86	contour095	Song	0	0
3	85	1,06	diff	diff	CORRECT	86	contour032	Song	-1.73502	1.73502
3	81	1,015	same	diff	INCORRECT	86	contour004	Speech	2.24009	2.24009
3	113	1,195	same	same	CORRECT	86	contour133	Speech	0	0
3	58	1,132	same	same	CORRECT	86	contour077	Speech	0	0
3	55	0,762	diff	diff	CORRECT	86	contour037	Song	1.82828	1.82828
3	7	2,554	same	same	CORRECT	86	contour037	Intermediate	0	0
3	80	0,78	diff	diff	CORRECT	86	contour095	Intermediate	4.04506	4.04506
3	108	2,302	diff	diff	CORRECT	86	contour047	Intermediate	5.52934	5.52934
3	12	0,799	diff	diff	CORRECT	86	contour077	Intermediate	5.65269	5.65269
3	22	4,289	same	diff	INCORRECT	86	contour047	Song	2.13091	2.13091
3	114	0,881	same	same	CORRECT	86	contour078	Song	0	0
3	41	0,586	diff	diff	CORRECT	86	contour150	Song	-4.73544	4.73544
3	91	0,618	diff	diff	CORRECT	86	contour123	Song	-2.82473	2.82473
3	71	1,301	same	same	CORRECT	86	contour038	Intermediate	0	0
3	106	0,861	same	same	CORRECT	86	contour042	Speech	0	0
3	42	0,977	diff	diff	CORRECT	86	contour077	Song	3.95768	3.95768
3	67	0,981	same	same	CORRECT	86	contour049	Song	0	0
3	59	0,56	same	same	CORRECT	86	contour075	Speech	0	0
3	84	0,854	same	same	CORRECT	86	contour064	Intermediate	0	0
3	17	0,655	diff	diff	CORRECT	86	contour152	Speech	5.67649	5.67649
3	109	0,9	same	same	CORRECT	86	contour075	Intermediate	0	0
3	93	0,906	diff	diff	CORRECT	86	contour152	Intermediate	-5.55534	5.55534
3	0	0,711	diff	diff	CORRECT	86	contour099	Intermediate	2.83506	2.83506
3	112	1,178	same	diff	INCORRECT	86	contour037	Speech	-1.42611	1.42611
3	33	0,734	diff	diff	CORRECT	86	contour137	Song	1.9048	1.9048
3	75	0,845	diff	diff	CORRECT	86	contour114	Song	3.57851	3.57851
3	111	0,687	same	same	CORRECT	86	contour167	Speech	0	0
3	96	3,762	diff	diff	CORRECT	86	contour174	Speech	4.26269	4.26269
3	20	0,893	same	same	CORRECT	86	contour078	Speech	0	0
3	21	0,697	diff	diff	CORRECT	86	contour174	Song	1.10675	1.10675
3	18	0,758	diff	diff	CORRECT	86	contour155	Speech	-3.07571	3.07571
3	1	1,216	diff	same	INCORRECT	86	contour016	Speech	0	0
3	15	1,036	same	same	CORRECT	86	contour168	Intermediate	0	0
3	115	1,074	same	same	CORRECT	86	contour182	Intermediate	0	0
3	88	0,732	diff	same	INCORRECT	86	contour003	Speech	0	0
4	51	1,968	same	same	CORRECT	96	contour150	Speech	0	0
4	78	1,808	same	diff	INCORRECT	96	contour189	Speech	-1.93467	1.93467
4	32	1,566	same	diff	INCORRECT	96	contour025	Speech	-4.50184	4.50184
4	108	1,161	same	same	CORRECT	96	contour032	Intermediate	0	0
4	101	2,325	same	same	CORRECT	96	contour137	Speech	0	0
4	40	1,55	same	diff	INCORRECT	96	contour038	Intermediate	2.06174	2.06174
4	25	1,572	same	same	CORRECT	96	contour095	Song	0	0
4	105	1,248	diff	same	INCORRECT	96	contour035	Speech	0	0
4	1	2,608	diff	diff	CORRECT	96	contour078	Song	-5.96438	5.96438
4	103	1,123	same	same	CORRECT	96	contour003	Song	0	0
4	13	1,641	same	same	CORRECT	96	contour163	Intermediate	0	0
4	99	2,346	same	diff	INCORRECT	96	contour083	Speech	-1.4467	1.4467
4	63	3,612	diff	same	INCORRECT	96	contour123	Song	0	0
4	62	1,277	diff	same	INCORRECT	96	contour123	Speech	0	0
4	15	1,805	diff	diff	CORRECT	96	contour032	Speech	-1.34554	1.34554
4	81	2,286	diff	diff	CORRECT	96	contour155	Intermediate	1.81332	1.81332
4	41	1,56	same	same	CORRECT	96	contour035	Intermediate	0	0
4	50	3,493	same	same	CORRECT	96	contour099	Intermediate	0	0
4	79	1,536	same	same	CORRECT	96	contour078	Speech	0	0
4	119	2,063	same	diff	INCORRECT	96	contour016	Intermediate	-2.04804	2.04804
4	43	3,303	same	diff	INCORRECT	96	contour163	Speech	2.18061	2.18061
4	53	1,788	diff	diff	CORRECT	96	contour168	Intermediate	1.46788	1.46788
4	56	3,203	diff	diff	CORRECT	96	contour153	Speech	3.67553	3.67553
4	7	1,555	same	same	CORRECT	96	contour182	Song	0	0
4	86	2,188	same	same	CORRECT	96	contour106	Speech	0	0
4	65	1,535	same	same	CORRECT	96	contour025	Song	0	0
4	42	1,291	same	same	CORRECT	96	contour168	Song	0	0
4	76	2,377	same	diff	INCORRECT	96	contour078	Intermediate	-5.31024	5.31024
4	87	2,754	same	diff	INCORRECT	96	contour083	Song	2.21799	2.21799
4	6	1,919	same	same	CORRECT	96	contour053	Intermediate	0	0
4	92	2,316	same	same	CORRECT	96	contour130	Intermediate	0	0
4	100	1,438	same	same	CORRECT	96	contour189	Song	0	0
4	12	2,128	same	same	CORRECT	96	contour161	Intermediate	0	0
4	72	4	same	same	CORRECT	96	contour182	Intermediate	0	0
4	60	2,61	diff	diff	CORRECT	96	contour016	Song	-1.27547	1.27547
4	58	1,891	diff	diff	CORRECT	96	contour083	Intermediate	-2.83781	2.83781
4	110	1,812	same	same	CORRECT	96	contour162	Song	0	0
4	29	1,169	diff	diff	CORRECT	96	contour152	Intermediate	-5.55534	5.55534
4	4	2,089	same	diff	INCORRECT	96	contour017	Intermediate	-1.08046	1.08046
4	112	1,772	same	same	CORRECT	96	contour049	Intermediate	0	0
4	93	3,193	same	diff	INCORRECT	96	contour037	Speech	-1.42611	1.42611
4	74	1,522	same	diff	INCORRECT	96	contour049	Song	2.0279	2.0279
4	88	1,755	same	same	CORRECT	96	contour153	Intermediate	0	0
4	57	3,044	same	same	CORRECT	96	contour106	Intermediate	0	0
4	11	1,186	same	same	CORRECT	96	contour189	Intermediate	0	0
4	17	1,143	same	diff	INCORRECT	96	contour106	Song	1.27951	1.27951
4	91	1,954	same	same	CORRECT	96	contour133	Song	0	0
4	0	6,494	diff	diff	CORRECT	96	contour095	Intermediate	4.04506	4.04506
4	33	1,893	diff	diff	CORRECT	96	contour162	Intermediate	-2.75832	2.75832
4	68	2,045	same	same	CORRECT	96	contour077	Intermediate	0	0
4	55	1,515	diff	diff	CORRECT	96	contour150	Song	-4.73544	4.73544
4	14	3,564	same	same	CORRECT	96	contour037	Intermediate	0	0
4	90	2,795	same	diff	INCORRECT	96	contour130	Song	3.34162	3.34162
4	48	1,755	same	same	CORRECT	96	contour165	Speech	0	0
4	67	1,072	diff	same	INCORRECT	96	contour004	Speech	0	0
4	44	5,122	same	same	CORRECT	96	contour099	Song	0	0
4	97	2,195	same	same	CORRECT	96	contour053	Song	0	0
4	111	1,253	same	diff	INCORRECT	96	contour064	Speech	-2.37355	2.37355
4	80	1,358	same	same	CORRECT	96	contour153	Song	0	0
4	109	2,194	same	diff	INCORRECT	96	contour163	Song	1.29428	1.29428
4	3	1,915	same	same	CORRECT	96	contour200	Speech	0	0
4	116	3,127	same	same	CORRECT	96	contour164	Speech	0	0
4	64	1,728	same	diff	INCORRECT	96	contour165	Song	-1.91035	1.91035
4	35	1,734	diff	diff	CORRECT	96	contour042	Speech	3.02936	3.02936
4	21	3,476	diff	diff	CORRECT	96	contour004	Intermediate	3.95277	3.95277
4	36	1,234	same	same	CORRECT	96	contour010	Song	0	0
4	66	1,315	same	diff	INCORRECT	96	contour164	Intermediate	-1.96033	1.96033
4	9	0,875	same	same	CORRECT	96	contour150	Intermediate	0	0
4	69	1,201	same	same	CORRECT	96	contour167	Speech	0	0
4	61	1,231	same	diff	INCORRECT	96	contour003	Speech	4.25884	4.25884
4	102	0,904	diff	diff	CORRECT	96	contour137	Intermediate	3.11261	3.11261
4	54	1,415	diff	diff	CORRECT	96	contour042	Song	2.86156	2.86156
4	115	2,928	same	same	CORRECT	96	contour011	Speech	0	0
4	24	0,707	diff	diff	CORRECT	96	contour161	Speech	3.58032	3.58032
4	20	1,667	same	same	CORRECT	96	contour011	Intermediate	0	0
4	39	2,111	same	diff	INCORRECT	96	contour075	Speech	-2.1487	2.1487
4	94	0,61	same	diff	INCORRECT	96	contour095	Speech	-1.59891	1.59891
4	114	1,085	same	same	CORRECT	96	contour016	Speech	0	0
4	113	1,564	same	same	CORRECT	96	contour037	Song	0	0
4	107	0,651	same	same	CORRECT	96	contour155	Speech	0	0
4	104	1,194	same	same	CORRECT	96	contour011	Song	0	0
4	31	0,733	diff	diff	CORRECT	96	contour161	Song	1.99204	1.99204
4	83	1,192	same	same	CORRECT	96	contour075	Song	0	0
4	27	0,705	same	same	CORRECT	96	contour077	Song	0	0
4	10	1,147	diff	diff	CORRECT	96	contour167	Intermediate	-3.43158	3.43158
4	75	1,917	same	diff	INCORRECT	96	contour133	Speech	4.13349	4.13349
4	106	1,246	same	same	CORRECT	96	contour077	Speech	0	0
4	46	1,547	diff	diff	CORRECT	96	contour017	Song	4.42381	4.42381
4	28	0,686	same	same	CORRECT	96	contour075	Intermediate	0	0
4	70	1,957	diff	diff	CORRECT	96	contour167	Song	2.85269	2.85269
4	22	1,131	diff	diff	CORRECT	96	contour064	Song	-5.2574	5.2574
4	73	1,43	same	same	CORRECT	96	contour017	Speech	0	0
4	23	2,329	diff	diff	CORRECT	96	contour123	Intermediate	-3.93938	3.93938
4	49	2,212	diff	same	INCORRECT	96	contour162	Speech	0	0
4	38	1,652	same	diff	INCORRECT	96	contour130	Speech	5.6717	5.6717
4	30	1,821	diff	diff	CORRECT	96	contour155	Song	-5.24018	5.24018
4	98	1,532	same	diff	INCORRECT	96	contour165	Intermediate	-2.03996	2.03996
4	59	0,949	same	same	CORRECT	96	contour182	Speech	0	0
4	19	1,168	diff	diff	CORRECT	96	contour152	Speech	5.67649	5.67649
4	77	1,399	same	diff	INCORRECT	96	contour025	Intermediate	2.07753	2.07753
4	18	1,148	same	same	CORRECT	96	contour133	Intermediate	0	0
4	117	0,904	same	diff	INCORRECT	96	contour032	Song	-1.73502	1.73502
4	26	1,334	same	same	CORRECT	96	contour035	Song	0	0
4	96	1,719	same	diff	INCORRECT	96	contour164	Song	3.74949	3.74949
4	8	1,176	same	diff	INCORRECT	96	contour064	Intermediate	-5.25313	5.25313
4	85	3,325	same	diff	INCORRECT	96	contour200	Intermediate	4.5219	4.5219
4	45	2,047	diff	diff	CORRECT	96	contour010	Speech	4.65826	4.65826
4	71	0,509	same	diff	INCORRECT	96	contour010	Intermediate	-5.39966	5.39966
4	47	0,951	same	same	CORRECT	96	contour137	Song	0	0
4	89	1,436	diff	diff	CORRECT	96	contour168	Speech	3.1411	3.1411
4	34	0,713	diff	diff	CORRECT	96	contour004	Song	-5.19558	5.19558
4	82	1,673	same	same	CORRECT	96	contour003	Intermediate	0	0
4	118	1,257	same	same	CORRECT	96	contour099	Speech	0	0
4	52	0,782	same	same	CORRECT	96	contour200	Song	0	0
4	84	0,863	diff	diff	CORRECT	96	contour152	Song	3.95252	3.95252
4	37	0,932	same	diff	INCORRECT	96	contour049	Speech	1.4765	1.4765
4	2	1,461	diff	same	INCORRECT	96	contour042	Intermediate	0	0
4	5	1,257	same	same	CORRECT	96	contour038	Speech	0	0
4	16	1,532	same	diff	INCORRECT	96	contour053	Speech	1.20203	1.20203
4	95	2,452	diff	diff	CORRECT	96	contour038	Song	-2.87033	2.87033
5	97	0,943	diff	same	INCORRECT	69	contour133	Speech	0	0
5	95	1	diff	diff	CORRECT	69	contour032	Speech	-1.34554	1.34554
5	81	0,868	same	same	CORRECT	69	contour095	Intermediate	0	0
5	0	8	diff	same	INCORRECT	69	contour171	Intermediate	0	0
5	68	1	diff	diff	CORRECT	69	contour171	Song	-5.73783	5.73783
5	91	1	diff	diff	CORRECT	69	contour137	Intermediate	3.11261	3.11261
5	25	6	diff	diff	CORRECT	69	contour123	Intermediate	-3.93938	3.93938
5	117	10	diff	same	INCORRECT	69	contour077	Song	0	0
5	76	1	same	same	CORRECT	69	contour167	Intermediate	0	0
5	51	1	diff	diff	CORRECT	69	contour174	Speech	4.26269	4.26269
5	98	1	same	same	CORRECT	69	contour078	Intermediate	0	0
5	8	1	diff	same	INCORRECT	69	contour168	Speech	0	0
5	9	2	diff	diff	CORRECT	69	contour189	Song	5.26882	5.26882
5	13	1	same	same	CORRECT	69	contour106	Intermediate	0	0
5	50	1	same	same	CORRECT	69	contour016	Song	0	0
5	41	4	diff	same	INCORRECT	69	contour004	Song	0	0
5	113	1	diff	same	INCORRECT	69	contour200	Song	0	0
5	18	2	same	same	CORRECT	69	contour075	Speech	0	0
5	3	1	same	diff	INCORRECT	69	contour095	Song	2.67127	2.67127
5	80	0,845	diff	diff	CORRECT	69	contour189	Intermediate	1.37025	1.37025
5	84	1	same	same	CORRECT	69	contour039	Intermediate	0	0
5	15	1	same	diff	INCORRECT	69	contour042	Song	2.86156	2.86156
5	53	1	same	diff	INCORRECT	69	contour075	Intermediate	4.92376	4.92376
5	62	1	same	diff	INCORRECT	69	contour083	Speech	-1.4467	1.4467
5	86	0,982	diff	diff	CORRECT	69	contour017	Song	4.42381	4.42381
5	85	1	same	diff	INCORRECT	69	contour035	Song	1.98272	1.98272
5	88	0,914	same	diff	INCORRECT	69	contour049	Intermediate	4.54933	4.54933
5	4	0,822	same	same	CORRECT	69	contour161	Speech	0	0
5	57	0,844	same	diff	INCORRECT	69	contour155	Song	-5.24018	5.24018
5	115	0,944	same	same	CORRECT	69	contour095	Speech	0	0
5	1	1	diff	same	INCORRECT	69	contour038	Song	0	0
5	93	2	same	same	CORRECT	69	contour053	Song	0	0
5	11	0,953	same	diff	INCORRECT	69	contour165	Speech	-1.46132	1.46132
5	36	1	same	same	CORRECT	69	contour053	Speech	0	0
5	105	0,811	same	same	CORRECT	69	contour083	Song	0	0
5	78	1	same	same	CORRECT	69	contour053	Intermediate	0	0
5	65	2	diff	diff	CORRECT	69	contour037	Intermediate	1.85345	1.85345
5	28	0,954	same	same	CORRECT	69	contour078	Speech	0	0
5	107	0,82	diff	same	INCORRECT	69	contour025	Intermediate	0	0
5	12	1	diff	same	INCORRECT	69	contour035	Intermediate	0	0
5	71	1	same	same	CORRECT	69	contour189	Speech	0	0
5	39	6	same	same	CORRECT	69	contour164	Song	0	0
5	64	2	same	diff	INCORRECT	69	contour114	Intermediate	3.13285	3.13285
5	23	1	same	diff	INCORRECT	69	contour083	Intermediate	-2.83781	2.83781
5	10	1	same	diff	INCORRECT	69	contour130	Speech	5.6717	5.6717
5	69	3	same	diff	INCORRECT	69	contour163	Song	1.29428	1.29428
5	54	1	same	same	CORRECT	69	contour137	Song	0	0
5	20	0,862	diff	diff	CORRECT	69	contour010	Speech	4.65826	4.65826
5	26	1	same	diff	INCORRECT	69	contour130	Song	3.34162	3.34162
5	70	1	diff	same	INCORRECT	69	contour174	Intermediate	0	0
5	14	1	same	same	CORRECT	69	contour152	Intermediate	0	0
5	24	3	diff	diff	CORRECT	69	contour167	Song	2.85269	2.85269
5	73	2	same	same	CORRECT	69	contour078	Song	0	0
5	102	2	diff	diff	CORRECT	69	contour032	Song	-1.73502	1.73502
5	21	0,934	diff	diff	CORRECT	69	contour150	Song	-4.73544	4.73544
5	48	2	same	same	CORRECT	69	contour016	Speech	0	0
5	40	1	same	same	CORRECT	69	contour161	Intermediate	0	0
5	94	0,875	same	same	CORRECT	69	contour025	Song	0	0
5	90	3	same	diff	INCORRECT	69	contour182	Speech	5.8125	5.8125
5	5	0,999	same	same	CORRECT	69	contour025	Speech	0	0
5	106	0,832	diff	diff	CORRECT	69	contour150	Intermediate	-2.4645	2.4645
5	27	1	same	same	CORRECT	69	contour010	Song	0	0
5	52	0,773	same	same	CORRECT	69	contour038	Speech	0	0
5	63	1	same	diff	INCORRECT	69	contour163	Speech	2.18061	2.18061
5	7	0,874	diff	same	INCORRECT	69	contour133	Intermediate	0	0
5	61	1	same	same	CORRECT	69	contour004	Speech	0	0
5	67	1	diff	diff	CORRECT	69	contour182	Song	-1.22359	1.22359
5	92	0,834	same	same	CORRECT	69	contour049	Speech	0	0
5	60	0,821	diff	diff	CORRECT	69	contour077	Intermediate	5.65269	5.65269
5	100	1	diff	diff	CORRECT	69	contour155	Speech	-3.07571	3.07571
5	22	2	same	diff	INCORRECT	69	contour075	Song	-2.69624	2.69624
5	17	3	diff	diff	CORRECT	69	contour164	Speech	2.48791	2.48791
5	112	0,693	same	same	CORRECT	69	contour174	Song	0	0
5	35	0,661	diff	diff	CORRECT	69	contour137	Speech	4.0314	4.0314
5	33	1	same	same	CORRECT	69	contour165	Intermediate	0	0
5	31	0,858	same	same	CORRECT	69	contour106	Song	0	0
5	82	1	diff	diff	CORRECT	69	contour004	Intermediate	3.95277	3.95277
5	38	1	same	diff	INCORRECT	69	contour037	Song	1.82828	1.82828
5	114	0,819	same	diff	INCORRECT	69	contour011	Speech	1.34502	1.34502
5	46	0,857	diff	diff	CORRECT	69	contour017	Intermediate	-1.08046	1.08046
5	103	2	diff	same	INCORRECT	69	contour152	Speech	0	0
5	37	0,896	same	diff	INCORRECT	69	contour163	Intermediate	1.38397	1.38397
5	99	2	same	diff	INCORRECT	69	contour167	Speech	3.67715	3.67715
5	75	0,959	same	diff	INCORRECT	69	contour099	Speech	-3.88002	3.88002
5	45	1	same	same	CORRECT	69	contour114	Speech	0	0
5	87	1	same	diff	INCORRECT	69	contour200	Speech	1.98524	1.98524
5	72	0,989	same	same	CORRECT	69	contour042	Intermediate	0	0
5	58	0,91	same	same	CORRECT	69	contour165	Song	0	0
5	74	0,817	diff	same	INCORRECT	69	contour123	Song	0	0
5	119	1	same	diff	INCORRECT	69	contour161	Song	1.99204	1.99204
5	59	3	diff	diff	CORRECT	69	contour016	Intermediate	-2.04804	2.04804
5	110	2	same	same	CORRECT	69	contour200	Intermediate	0	0
5	32	1	same	same	CORRECT	69	contour038	Intermediate	0	0
5	16	1	diff	diff	CORRECT	69	contour011	Song	-4.46781	4.46781
5	109	2	same	diff	INCORRECT	69	contour150	Speech	-4.83777	4.83777
5	30	1	same	same	CORRECT	69	contour106	Speech	0	0
5	77	0,665	same	same	CORRECT	69	contour168	Song	0	0
5	42	0,841	same	same	CORRECT	69	contour133	Song	0	0
5	44	1	diff	diff	CORRECT	69	contour049	Song	2.0279	2.0279
5	108	1	same	same	CORRECT	69	contour042	Speech	0	0
5	96	1	diff	same	INCORRECT	69	contour171	Speech	0	0
5	116	0,933	same	diff	INCORRECT	69	contour155	Intermediate	1.81332	1.81332
5	111	0,774	diff	diff	CORRECT	69	contour035	Speech	-5.26655	5.26655
5	55	2	diff	same	INCORRECT	69	contour032	Intermediate	0	0
5	29	0,846	diff	diff	CORRECT	69	contour182	Intermediate	-5.52258	5.52258
5	101	2	diff	same	INCORRECT	69	contour123	Speech	0	0
5	56	1	same	diff	INCORRECT	69	contour010	Intermediate	-5.39966	5.39966
5	49	1	diff	same	INCORRECT	69	contour164	Intermediate	0	0
5	47	2	same	diff	INCORRECT	69	contour039	Song	2.75129	2.75129
5	6	0,86	same	diff	INCORRECT	69	contour011	Intermediate	-4.94278	4.94278
5	89	2	same	diff	INCORRECT	69	contour039	Speech	-3.87441	3.87441
5	104	1	same	diff	INCORRECT	69	contour168	Intermediate	1.46788	1.46788
5	43	0,578	diff	diff	CORRECT	69	contour099	Intermediate	2.83506	2.83506
5	79	0,997	same	same	CORRECT	69	contour037	Speech	0	0
5	83	2	same	diff	INCORRECT	69	contour017	Speech	4.43206	4.43206
5	34	0,888	same	same	CORRECT	69	contour130	Intermediate	0	0
5	118	0,598	same	same	CORRECT	69	contour099	Song	0	0
5	19	3	same	same	CORRECT	69	contour114	Song	0	0
5	66	2	same	diff	INCORRECT	69	contour077	Speech	5.30815	5.30815
5	2	1	diff	diff	CORRECT	69	contour152	Song	3.95252	3.95252
6	13	2,95	diff	diff	CORRECT	83	contour152	Intermediate	-5.55534	5.55534
6	74	1,589	diff	same	INCORRECT	83	contour167	Speech	0	0
6	54	0,973	same	diff	INCORRECT	83	contour200	Song	-4.76772	4.76772
6	53	1,17	diff	diff	CORRECT	83	contour017	Speech	4.43206	4.43206
6	109	0,95	same	diff	INCORRECT	83	contour174	Speech	4.26269	4.26269
6	88	0,935	same	same	CORRECT	83	contour075	Speech	0	0
6	64	1,995	same	diff	INCORRECT	83	contour083	Intermediate	-2.83781	2.83781
6	55	1,294	same	diff	INCORRECT	83	contour038	Intermediate	2.06174	2.06174
6	25	0,946	diff	diff	CORRECT	83	contour038	Speech	4.06729	4.06729
6	83	2,117	same	diff	INCORRECT	83	contour083	Speech	-1.4467	1.4467
6	98	1,355	same	diff	INCORRECT	83	contour164	Song	3.74949	3.74949
6	23	1,182	same	same	CORRECT	83	contour016	Speech	0	0
6	44	1,358	same	diff	INCORRECT	83	contour078	Intermediate	-5.31024	5.31024
6	33	1,468	same	same	CORRECT	83	contour167	Intermediate	0	0
6	72	1,171	same	same	CORRECT	83	contour099	Intermediate	0	0
6	46	1,231	diff	same	INCORRECT	83	contour039	Speech	0	0
6	80	1,905	same	same	CORRECT	83	contour037	Intermediate	0	0
6	9	1,935	diff	diff	CORRECT	83	contour004	Song	-5.19558	5.19558
6	114	1,593	same	diff	INCORRECT	83	contour078	Speech	4.01977	4.01977
6	11	1,248	same	diff	INCORRECT	83	contour099	Song	-3.16516	3.16516
6	47	1,368	diff	diff	CORRECT	83	contour189	Intermediate	1.37025	1.37025
6	96	1,008	same	diff	INCORRECT	83	contour035	Song	1.98272	1.98272
6	3	1,212	diff	same	INCORRECT	83	contour010	Song	0	0
6	90	1,023	same	diff	INCORRECT	83	contour165	Intermediate	-2.03996	2.03996
6	48	1,024	same	diff	INCORRECT	83	contour174	Intermediate	-3.7986	3.7986
6	77	1,469	same	diff	INCORRECT	83	contour064	Intermediate	-5.25313	5.25313
6	19	1,099	same	diff	INCORRECT	83	contour133	Speech	4.13349	4.13349
6	107	2,184	same	diff	INCORRECT	83	contour049	Intermediate	4.54933	4.54933
6	101	1,142	diff	diff	CORRECT	83	contour130	Intermediate	5.54485	5.54485
6	106	0,834	diff	diff	CORRECT	83	contour164	Speech	2.48791	2.48791
6	27	1,101	same	same	CORRECT	83	contour163	Speech	0	0
6	32	0,649	same	same	CORRECT	83	contour189	Song	0	0
6	36	1,452	same	same	CORRECT	83	contour004	Intermediate	0	0
6	103	0,816	same	same	CORRECT	83	contour133	Intermediate	0	0
6	58	3,299	same	same	CORRECT	83	contour037	Song	0	0
6	102	1,323	same	same	CORRECT	83	contour133	Song	0	0
6	119	2,838	same	diff	INCORRECT	83	contour153	Intermediate	3.77205	3.77205
6	4	1,824	same	same	CORRECT	83	contour165	Song	0	0
6	78	1,41	same	same	CORRECT	83	contour150	Song	0	0
6	100	0,64	same	diff	INCORRECT	83	contour053	Intermediate	1.81508	1.81508
6	91	1,485	same	same	CORRECT	83	contour155	Song	0	0
6	87	0,793	same	diff	INCORRECT	83	contour003	Speech	4.25884	4.25884
6	24	0,81	same	diff	INCORRECT	83	contour010	Intermediate	-5.39966	5.39966
6	92	1,928	same	diff	INCORRECT	83	contour162	Speech	5.59484	5.59484
6	6	1,186	same	same	CORRECT	83	contour047	Intermediate	0	0
6	73	1,073	same	same	CORRECT	83	contour130	Speech	0	0
6	104	0,885	same	same	CORRECT	83	contour049	Song	0	0
6	21	0,658	same	same	CORRECT	83	contour064	Song	0	0
6	108	0,947	diff	diff	CORRECT	83	contour025	Speech	-4.50184	4.50184
6	28	1,44	diff	diff	CORRECT	83	contour162	Intermediate	-2.75832	2.75832
6	79	1,072	same	same	CORRECT	83	contour168	Intermediate	0	0
6	30	0,948	diff	diff	CORRECT	83	contour025	Song	1.98477	1.98477
6	10	0,926	diff	same	INCORRECT	83	contour152	Speech	0	0
6	51	1,188	same	same	CORRECT	83	contour137	Song	0	0
6	40	0,484	same	same	CORRECT	83	contour035	Intermediate	0	0
6	105	0,948	same	same	CORRECT	83	contour171	Intermediate	0	0
6	8	1,712	diff	same	INCORRECT	83	contour025	Intermediate	0	0
6	97	0,873	same	diff	INCORRECT	83	contour004	Speech	2.24009	2.24009
6	31	1,382	same	diff	INCORRECT	83	contour011	Intermediate	-4.94278	4.94278
6	112	1,287	diff	same	INCORRECT	83	contour155	Intermediate	0	0
6	50	1,238	same	same	CORRECT	83	contour182	Intermediate	0	0
6	0	1,381	same	diff	INCORRECT	83	contour078	Song	-5.96438	5.96438
6	1	0,906	same	same	CORRECT	83	contour167	Song	0	0
6	75	1,645	same	same	CORRECT	83	contour152	Song	0	0
6	76	1,356	same	same	CORRECT	83	contour016	Intermediate	0	0
6	42	0,575	diff	diff	CORRECT	83	contour168	Song	-2.66717	2.66717
6	22	0,863	same	diff	INCORRECT	83	contour200	Speech	1.98524	1.98524
6	35	0,73	diff	diff	CORRECT	83	contour053	Song	-2.40718	2.40718
6	68	1,254	same	diff	INCORRECT	83	contour053	Speech	1.20203	1.20203
6	62	1,746	same	diff	INCORRECT	83	contour077	Song	3.95768	3.95768
6	59	1,092	same	diff	INCORRECT	83	contour037	Speech	-1.42611	1.42611
6	110	1,397	same	diff	INCORRECT	83	contour114	Speech	-1.52123	1.52123
6	37	0,939	same	same	CORRECT	83	contour016	Song	0	0
6	16	0,996	diff	diff	CORRECT	83	contour171	Song	-5.73783	5.73783
6	60	1,159	same	same	CORRECT	83	contour077	Intermediate	0	0
6	85	2,683	same	diff	INCORRECT	83	contour171	Speech	2.51472	2.51472
6	43	1,374	same	same	CORRECT	83	contour155	Speech	0	0
6	117	5,297	same	diff	INCORRECT	83	contour182	Song	-1.22359	1.22359
6	84	1,151	same	same	CORRECT	83	contour189	Speech	0	0
6	65	0,811	diff	diff	CORRECT	83	contour047	Song	2.13091	2.13091
6	52	0,789	same	same	CORRECT	83	contour130	Song	0	0
6	71	2,037	diff	same	INCORRECT	83	contour163	Intermediate	0	0
6	70	1,149	diff	diff	CORRECT	83	contour162	Song	4.48308	4.48308
6	93	1,496	same	same	CORRECT	83	contour017	Intermediate	0	0
6	113	1,319	same	same	CORRECT	83	contour200	Intermediate	0	0
6	39	1,249	diff	diff	CORRECT	83	contour114	Intermediate	3.13285	3.13285
6	2	1,156	diff	diff	CORRECT	83	contour035	Speech	-5.26655	5.26655
6	66	1,982	same	same	CORRECT	83	contour047	Speech	0	0
6	20	1,453	diff	diff	CORRECT	83	contour017	Song	4.42381	4.42381
6	63	1,75	diff	diff	CORRECT	83	contour153	Speech	3.67553	3.67553
6	82	1,111	same	same	CORRECT	83	contour174	Song	0	0
6	86	1,835	same	diff	INCORRECT	83	contour003	Intermediate	4.60981	4.60981
6	95	1,995	same	diff	INCORRECT	83	contour077	Speech	5.30815	5.30815
6	15	1,661	same	diff	INCORRECT	83	contour011	Song	-4.46781	4.46781
6	14	1,395	same	same	CORRECT	83	contour095	Intermediate	0	0
6	45	2,266	same	same	CORRECT	83	contour164	Intermediate	0	0
6	41	1,89	same	same	CORRECT	83	contour095	Speech	0	0
6	69	0,8	same	same	CORRECT	83	contour182	Speech	0	0
6	12	1,264	same	same	CORRECT	83	contour038	Song	0	0
6	61	0,831	diff	diff	CORRECT	83	contour039	Intermediate	-1.88056	1.88056
6	18	0,803	diff	diff	CORRECT	83	contour153	Song	1.47389	1.47389
6	99	1,105	same	same	CORRECT	83	contour137	Speech	0	0
6	57	1,143	same	same	CORRECT	83	contour003	Song	0	0
6	118	2,919	same	same	CORRECT	83	contour150	Intermediate	0	0
6	81	2,624	same	diff	INCORRECT	83	contour075	Intermediate	4.92376	4.92376
6	89	1,217	same	same	CORRECT	83	contour064	Speech	0	0
6	17	1,837	same	same	CORRECT	83	contour150	Speech	0	0
6	7	2,343	same	same	CORRECT	83	contour011	Speech	0	0
6	38	1,434	same	same	CORRECT	83	contour095	Song	0	0
6	94	1,584	same	same	CORRECT	83	contour168	Speech	0	0
6	29	1,806	same	diff	INCORRECT	83	contour165	Speech	-1.46132	1.46132
6	115	1,28	diff	diff	CORRECT	83	contour137	Intermediate	3.11261	3.11261
6	34	1,909	same	diff	INCORRECT	83	contour114	Song	3.57851	3.57851
6	26	1,717	same	same	CORRECT	83	contour010	Speech	0	0
6	5	1,745	same	diff	INCORRECT	83	contour039	Song	2.75129	2.75129
6	116	1,29	same	same	CORRECT	83	contour099	Speech	0	0
6	49	1,798	same	same	CORRECT	83	contour083	Song	0	0
6	111	2,52	same	same	CORRECT	83	contour163	Song	0	0
6	56	0,97	same	diff	INCORRECT	83	contour075	Song	-2.69624	2.69624
6	67	1,164	same	same	CORRECT	83	contour049	Speech	0	0
7	108	1,189	same	diff	INCORRECT	43	contour155	Intermediate	1.81332	1.81332
7	28	2,832	diff	same	INCORRECT	43	contour064	Intermediate	0	0
7	10	1,06	same	same	CORRECT	43	contour167	Intermediate	0	0
7	94	1,803	same	diff	INCORRECT	43	contour189	Intermediate	1.37025	1.37025
7	81	0,813	diff	diff	CORRECT	43	contour095	Intermediate	4.04506	4.04506
7	95	1,22	diff	diff	CORRECT	43	contour168	Intermediate	1.46788	1.46788
7	105	1,435	same	diff	INCORRECT	43	contour165	Intermediate	-2.03996	2.03996
7	37	0,981	same	same	CORRECT	43	contour099	Intermediate	0	0
7	7	0,745	same	diff	INCORRECT	43	contour150	Speech	-4.83777	4.83777
7	64	1,314	same	same	CORRECT	43	contour165	Speech	0	0
7	43	1,446	same	same	CORRECT	43	contour133	Speech	0	0
7	15	0,743	diff	diff	CORRECT	43	contour182	Intermediate	-5.52258	5.52258
7	21	1,176	diff	diff	CORRECT	43	contour155	Song	-5.24018	5.24018
7	117	0,896	same	same	CORRECT	43	contour106	Song	0	0
7	84	1,899	diff	diff	CORRECT	43	contour114	Intermediate	3.13285	3.13285
7	55	0,685	same	same	CORRECT	43	contour164	Intermediate	0	0
7	25	0,907	same	same	CORRECT	43	contour167	Speech	0	0
7	89	0,74	diff	diff	CORRECT	43	contour025	Song	1.98477	1.98477
7	11	4,754	same	diff	INCORRECT	43	contour114	Speech	-1.52123	1.52123
7	35	1,31	diff	diff	CORRECT	43	contour162	Intermediate	-2.75832	2.75832
7	1	0,778	same	same	CORRECT	43	contour032	Song	0	0
7	92	3,309	same	diff	INCORRECT	43	contour025	Speech	-4.50184	4.50184
7	58	0,668	same	same	CORRECT	43	contour164	Speech	0	0
7	96	1,159	same	same	CORRECT	43	contour049	Intermediate	0	0
7	20	0,776	same	diff	INCORRECT	43	contour133	Intermediate	3.14672	3.14672
7	80	0,647	same	same	CORRECT	43	contour064	Speech	0	0
7	39	1,513	same	same	CORRECT	43	contour035	Song	0	0
7	66	1,109	same	same	CORRECT	43	contour077	Song	0	0
7	23	1,222	same	same	CORRECT	43	contour075	Song	0	0
7	76	1,023	same	same	CORRECT	43	contour049	Song	0	0
7	48	0,788	diff	diff	CORRECT	43	contour167	Song	2.85269	2.85269
7	100	2,855	same	same	CORRECT	43	contour042	Intermediate	0	0
7	0	0,809	diff	diff	CORRECT	43	contour152	Song	3.95252	3.95252
7	115	1,54	same	same	CORRECT	43	contour150	Song	0	0
7	104	1,108	same	same	CORRECT	43	contour171	Speech	0	0
7	113	0,73	same	same	CORRECT	43	contour039	Song	0	0
7	8	2,736	same	same	CORRECT	43	contour077	Speech	0	0
7	99	1,13	same	diff	INCORRECT	43	contour010	Song	1.88078	1.88078
7	116	1,247	same	same	CORRECT	43	contour017	Intermediate	0	0
7	51	1,286	diff	diff	CORRECT	43	contour165	Song	-1.91035	1.91035
7	87	1,054	same	diff	INCORRECT	43	contour011	Song	-4.46781	4.46781
7	24	1,698	diff	same	INCORRECT	43	contour130	Song	0	0
7	75	1,085	same	diff	INCORRECT	43	contour095	Speech	-1.59891	1.59891
7	98	4,973	diff	same	INCORRECT	43	contour171	Intermediate	0	0
7	16	0,801	diff	diff	CORRECT	43	contour163	Song	1.29428	1.29428
7	79	3,842	same	diff	INCORRECT	43	contour168	Song	-2.66717	2.66717
7	26	1,416	diff	diff	CORRECT	43	contour130	Speech	5.6717	5.6717
7	12	1,074	same	diff	INCORRECT	43	contour137	Song	1.9048	1.9048
7	107	1,02	same	same	CORRECT	43	contour038	Speech	0	0
7	69	0,844	same	same	CORRECT	43	contour047	Intermediate	0	0
7	114	1,703	same	diff	INCORRECT	43	contour035	Intermediate	1.49424	1.49424
7	30	1,14	same	same	CORRECT	43	contour011	Speech	0	0
7	119	0,958	same	same	CORRECT	43	contour137	Intermediate	0	0
7	71	2,834	diff	same	INCORRECT	43	contour037	Song	0	0
7	106	1,636	diff	diff	CORRECT	43	contour078	Song	-5.96438	5.96438
7	46	1,281	same	same	CORRECT	43	contour037	Speech	0	0
7	59	1,398	same	same	CORRECT	43	contour130	Intermediate	0	0
7	111	0,899	same	same	CORRECT	43	contour053	Intermediate	0	0
7	83	1,271	same	same	CORRECT	43	contour010	Intermediate	0	0
7	54	0,864	same	diff	INCORRECT	43	contour163	Speech	2.18061	2.18061
7	33	0,826	same	same	CORRECT	43	contour182	Speech	0	0
7	6	1,164	diff	diff	CORRECT	43	contour016	Song	-1.27547	1.27547
7	63	0,93	same	diff	INCORRECT	43	contour153	Speech	3.67553	3.67553
7	65	3,921	same	diff	INCORRECT	43	contour037	Intermediate	1.85345	1.85345
7	53	1,104	diff	diff	CORRECT	43	contour039	Intermediate	-1.88056	1.88056
7	73	1,424	same	same	CORRECT	43	contour161	Speech	0	0
7	103	0,973	same	same	CORRECT	43	contour078	Speech	0	0
7	61	1,163	same	same	CORRECT	43	contour095	Song	0	0
7	5	1,115	diff	diff	CORRECT	43	contour075	Speech	-2.1487	2.1487
7	97	1,025	same	same	CORRECT	43	contour004	Intermediate	0	0
7	44	0,864	same	same	CORRECT	43	contour032	Speech	0	0
7	42	0,562	diff	diff	CORRECT	43	contour077	Intermediate	5.65269	5.65269
7	3	0,764	same	same	CORRECT	43	contour047	Song	0	0
7	112	1,085	diff	diff	CORRECT	43	contour106	Intermediate	1.33333	1.33333
7	88	1,174	diff	diff	CORRECT	43	contour017	Speech	4.43206	4.43206
7	4	1,12	same	same	CORRECT	43	contour164	Song	0	0
7	31	0,886	same	diff	INCORRECT	43	contour153	Song	1.47389	1.47389
7	38	1,04	diff	diff	CORRECT	43	contour035	Speech	-5.26655	5.26655
7	91	1,42	same	same	CORRECT	43	contour011	Intermediate	0	0
7	17	1,146	same	same	CORRECT	43	contour153	Intermediate	0	0
7	109	1,374	same	same	CORRECT	43	contour042	Song	0	0
7	67	1,211	same	same	CORRECT	43	contour189	Speech	0	0
7	41	2,366	diff	same	INCORRECT	43	contour053	Song	0	0
7	72	0,849	same	same	CORRECT	43	contour182	Song	0	0
7	118	1,699	same	same	CORRECT	43	contour010	Speech	0	0
7	40	2,35	same	diff	INCORRECT	43	contour162	Song	4.48308	4.48308
7	68	1,686	same	same	CORRECT	43	contour150	Intermediate	0	0
7	19	0,718	diff	diff	CORRECT	43	contour064	Song	-5.2574	5.2574
7	52	1,335	same	diff	INCORRECT	43	contour032	Intermediate	-2.79765	2.79765
7	62	0,857	same	diff	INCORRECT	43	contour049	Speech	1.4765	1.4765
7	86	0,788	same	same	CORRECT	43	contour042	Speech	0	0
7	14	0,998	same	same	CORRECT	43	contour106	Speech	0	0
7	110	0,867	same	diff	INCORRECT	43	contour016	Intermediate	-2.04804	2.04804
7	50	1,319	same	same	CORRECT	43	contour099	Song	0	0
7	78	0,637	same	same	CORRECT	43	contour171	Song	0	0
7	47	0,579	same	diff	INCORRECT	43	contour047	Speech	3.64892	3.64892
7	9	1,292	diff	diff	CORRECT	43	contour004	Song	-5.19558	5.19558
7	102	0,655	diff	diff	CORRECT	43	contour152	Speech	5.67649	5.67649
7	93	0,583	diff	diff	CORRECT	43	contour155	Speech	-3.07571	3.07571
7	13	1,056	same	diff	INCORRECT	43	contour161	Song	1.99204	1.99204
7	60	1,011	diff	diff	CORRECT	43	contour004	Speech	2.24009	2.24009
7	45	1,159	diff	diff	CORRECT	43	contour163	Intermediate	1.38397	1.38397
7	49	0,715	diff	diff	CORRECT	43	contour152	Intermediate	-5.55534	5.55534
7	2	1,436	same	same	CORRECT	43	contour162	Speech	0	0
7	18	0,967	same	same	CORRECT	43	contour017	Song	0	0
7	82	1,008	same	same	CORRECT	43	contour161	Intermediate	0	0
7	34	0,721	same	same	CORRECT	43	contour038	Intermediate	0	0
7	90	1,069	same	same	CORRECT	43	contour114	Song	0	0
7	56	3,08	same	diff	INCORRECT	43	contour189	Song	5.26882	5.26882
7	32	0,929	diff	diff	CORRECT	43	contour075	Intermediate	4.92376	4.92376
7	22	0,735	diff	diff	CORRECT	43	contour133	Song	4.57916	4.57916
7	70	1,101	same	diff	INCORRECT	43	contour038	Song	-2.87033	2.87033
7	36	0,533	diff	diff	CORRECT	43	contour137	Speech	4.0314	4.0314
7	85	1,414	diff	diff	CORRECT	43	contour025	Intermediate	2.07753	2.07753
7	57	0,867	same	diff	INCORRECT	43	contour016	Speech	2.80436	2.80436
7	74	1,787	same	same	CORRECT	43	contour099	Speech	0	0
7	77	0,83	same	same	CORRECT	43	contour078	Intermediate	0	0
7	27	1,423	same	diff	INCORRECT	43	contour168	Speech	3.1411	3.1411
7	101	1,638	same	diff	INCORRECT	43	contour053	Speech	1.20203	1.20203
7	29	1,435	same	diff	INCORRECT	43	contour039	Speech	-3.87441	3.87441
8	105	1,26	same	same	CORRECT	35	contour035	Speech	0	0
8	79	1,974	diff	diff	CORRECT	35	contour095	Intermediate	4.04506	4.04506
8	78	3,926	same	same	CORRECT	35	contour133	Intermediate	0	0
8	20	0,946	diff	same	INCORRECT	35	contour035	Song	0	0
8	57	2,217	same	same	CORRECT	35	contour153	Speech	0	0
8	103	2,296	same	diff	INCORRECT	35	contour035	Intermediate	1.49424	1.49424
8	3	2,261	diff	same	INCORRECT	35	contour182	Intermediate	0	0
8	15	3,186	diff	same	INCORRECT	35	contour078	Intermediate	0	0
8	71	1,708	diff	diff	CORRECT	35	contour004	Song	-5.19558	5.19558
8	86	5,471	same	diff	INCORRECT	35	contour152	Song	3.95252	3.95252
8	42	2,914	diff	diff	CORRECT	35	contour083	Song	2.21799	2.21799
8	56	2,091	diff	diff	CORRECT	35	contour133	Song	4.57916	4.57916
8	60	2,365	same	same	CORRECT	35	contour047	Song	0	0
8	50	1,792	diff	same	INCORRECT	35	contour064	Song	0	0
8	34	2,825	same	same	CORRECT	35	contour123	Intermediate	0	0
8	58	2,449	same	diff	INCORRECT	35	contour099	Intermediate	2.83506	2.83506
8	100	2,578	same	same	CORRECT	35	contour038	Intermediate	0	0
8	66	1,77	same	diff	INCORRECT	35	contour123	Speech	-2.54352	2.54352
8	90	2,147	same	diff	INCORRECT	35	contour010	Speech	4.65826	4.65826
8	99	1,856	diff	diff	CORRECT	35	contour016	Intermediate	-2.04804	2.04804
8	94	1,672	same	same	CORRECT	35	contour155	Song	0	0
8	13	2,031	same	same	CORRECT	35	contour106	Speech	0	0
8	113	6,333	diff	diff	CORRECT	35	contour025	Song	1.98477	1.98477
8	87	2,274	same	diff	INCORRECT	35	contour077	Speech	5.30815	5.30815
8	28	2,713	same	diff	INCORRECT	35	contour078	Speech	4.01977	4.01977
8	46	2,084	diff	diff	CORRECT	35	contour049	Speech	1.4765	1.4765
8	114	2,96	same	same	CORRECT	35	contour168	Intermediate	0	0
8	16	2,214	same	diff	INCORRECT	35	contour011	Speech	1.34502	1.34502
8	97	3,102	same	diff	INCORRECT	35	contour137	Intermediate	3.11261	3.11261
8	12	2,112	same	diff	INCORRECT	35	contour077	Intermediate	5.65269	5.65269
8	118	1,691	same	diff	INCORRECT	35	contour189	Speech	-1.93467	1.93467
8	77	2,056	diff	diff	CORRECT	35	contour042	Song	2.86156	2.86156
8	2	1,151	diff	diff	CORRECT	35	contour049	Intermediate	4.54933	4.54933
8	70	1,848	diff	same	INCORRECT	35	contour133	Speech	0	0
8	0	1,418	same	same	CORRECT	35	contour011	Intermediate	0	0
8	68	1,59	same	same	CORRECT	35	contour011	Song	0	0
8	17	1,658	diff	same	INCORRECT	35	contour200	Song	0	0
8	98	1,555	same	same	CORRECT	35	contour174	Speech	0	0
8	18	1,029	diff	diff	CORRECT	35	contour099	Song	-3.16516	3.16516
8	19	2,055	diff	diff	CORRECT	35	contour042	Speech	3.02936	3.02936
8	93	1,248	diff	same	INCORRECT	35	contour137	Song	0	0
8	4	2,254	same	diff	INCORRECT	35	contour162	Intermediate	-2.75832	2.75832
8	33	1,515	diff	same	INCORRECT	35	contour064	Intermediate	0	0
8	29	1,27	same	diff	INCORRECT	35	contour010	Song	1.88078	1.88078
8	14	1,102	diff	diff	CORRECT	35	contour155	Speech	-3.07571	3.07571
8	47	1,058	same	diff	INCORRECT	35	contour004	Speech	2.24009	2.24009
8	73	1,14	same	same	CORRECT	35	contour168	Song	0	0
8	96	2,732	diff	diff	CORRECT	35	contour037	Song	1.82828	1.82828
8	110	1,796	diff	diff	CORRECT	35	contour152	Intermediate	-5.55534	5.55534
8	62	1,968	same	same	CORRECT	35	contour037	Intermediate	0	0
8	8	2,75	same	diff	INCORRECT	35	contour164	Speech	2.48791	2.48791
8	102	1,501	diff	diff	CORRECT	35	contour016	Song	-1.27547	1.27547
8	107	1,611	same	diff	INCORRECT	35	contour083	Speech	-1.4467	1.4467
8	74	1,08	diff	same	INCORRECT	35	contour025	Intermediate	0	0
8	91	1,398	diff	diff	CORRECT	35	contour164	Song	3.74949	3.74949
8	26	5,473	same	same	CORRECT	35	contour162	Speech	0	0
8	83	1,846	diff	same	INCORRECT	35	contour182	Speech	0	0
8	80	1,646	same	same	CORRECT	35	contour106	Song	0	0
8	1	1,759	diff	same	INCORRECT	35	contour155	Intermediate	0	0
8	25	1,112	same	same	CORRECT	35	contour152	Speech	0	0
8	72	1,554	same	diff	INCORRECT	35	contour017	Intermediate	-1.08046	1.08046
8	7	1,629	diff	same	INCORRECT	35	contour200	Speech	0	0
8	65	1,912	same	diff	INCORRECT	35	contour099	Speech	-3.88002	3.88002
8	22	1,89	same	diff	INCORRECT	35	contour153	Intermediate	3.77205	3.77205
8	82	1,307	same	diff	INCORRECT	35	contour161	Speech	3.58032	3.58032
8	64	1,267	diff	same	INCORRECT	35	contour162	Song	0	0
8	101	2,914	diff	same	INCORRECT	35	contour038	Speech	0	0
8	44	1,603	same	same	CORRECT	35	contour064	Speech	0	0
8	76	1,305	same	same	CORRECT	35	contour037	Speech	0	0
8	5	1,488	diff	same	INCORRECT	35	contour077	Song	0	0
8	104	1,693	same	diff	INCORRECT	35	contour049	Song	2.0279	2.0279
8	45	2,362	same	same	CORRECT	35	contour171	Intermediate	0	0
8	24	1,571	same	diff	INCORRECT	35	contour114	Intermediate	3.13285	3.13285
8	112	1,306	same	same	CORRECT	35	contour189	Intermediate	0	0
8	111	1,018	diff	diff	CORRECT	35	contour010	Intermediate	-5.39966	5.39966
8	115	1,11	same	same	CORRECT	35	contour168	Speech	0	0
8	85	2,168	same	same	CORRECT	35	contour114	Song	0	0
8	39	1,013	same	diff	INCORRECT	35	contour053	Speech	1.20203	1.20203
8	53	2,967	same	same	CORRECT	35	contour200	Intermediate	0	0
8	30	2,554	same	same	CORRECT	35	contour095	Song	0	0
8	59	2,467	same	diff	INCORRECT	35	contour025	Speech	-4.50184	4.50184
8	55	1,662	diff	diff	CORRECT	35	contour095	Speech	-1.59891	1.59891
8	63	1,461	diff	diff	CORRECT	35	contour017	Song	4.42381	4.42381
8	109	1,679	diff	same	INCORRECT	35	contour047	Intermediate	0	0
8	31	3,213	same	diff	INCORRECT	35	contour153	Song	1.47389	1.47389
8	84	1,196	diff	diff	CORRECT	35	contour164	Intermediate	-1.96033	1.96033
8	54	1,481	diff	diff	CORRECT	35	contour150	Song	-4.73544	4.73544
8	75	1,301	same	same	CORRECT	35	contour016	Speech	0	0
8	117	0,942	same	same	CORRECT	35	contour114	Speech	0	0
8	27	1,981	diff	same	INCORRECT	35	contour165	Song	0	0
8	40	1,454	same	same	CORRECT	35	contour039	Speech	0	0
8	92	1,322	diff	diff	CORRECT	35	contour130	Intermediate	5.54485	5.54485
8	41	1,421	same	same	CORRECT	35	contour017	Speech	0	0
8	10	1,601	same	same	CORRECT	35	contour106	Intermediate	0	0
8	106	1,228	diff	same	INCORRECT	35	contour078	Song	0	0
8	108	1,414	diff	diff	CORRECT	35	contour039	Song	2.75129	2.75129
8	61	1,001	same	diff	INCORRECT	35	contour161	Intermediate	-2.79127	2.79127
8	48	1,165	same	diff	INCORRECT	35	contour165	Speech	-1.46132	1.46132
8	119	1,805	same	same	CORRECT	35	contour161	Song	0	0
8	11	2,008	diff	same	INCORRECT	35	contour189	Song	0	0
8	6	1,456	same	same	CORRECT	35	contour165	Intermediate	0	0
8	49	1,452	same	diff	INCORRECT	35	contour150	Intermediate	-2.4645	2.4645
8	21	2,732	diff	same	INCORRECT	35	contour130	Speech	0	0
8	81	1,598	same	diff	INCORRECT	35	contour150	Speech	-4.83777	4.83777
8	51	1,556	diff	diff	CORRECT	35	contour042	Intermediate	-2.78707	2.78707
8	38	0,93	same	same	CORRECT	35	contour137	Speech	0	0
8	69	1,649	same	same	CORRECT	35	contour039	Intermediate	0	0
8	116	1,474	diff	diff	CORRECT	35	contour174	Intermediate	-3.7986	3.7986
8	37	2,224	same	same	CORRECT	35	contour053	Intermediate	0	0
8	95	1,193	same	diff	INCORRECT	35	contour047	Speech	3.64892	3.64892
8	67	1,128	same	same	CORRECT	35	contour174	Song	0	0
8	23	1,493	diff	same	INCORRECT	35	contour182	Song	0	0
8	35	1,852	diff	same	INCORRECT	35	contour171	Song	0	0
8	88	2,116	same	diff	INCORRECT	35	contour123	Song	-2.82473	2.82473
8	9	1,335	diff	same	INCORRECT	35	contour171	Speech	0	0
8	43	1,4	same	diff	INCORRECT	35	contour053	Song	-2.40718	2.40718
8	32	1,138	same	same	CORRECT	35	contour083	Intermediate	0	0
8	52	2,443	diff	diff	CORRECT	35	contour130	Song	3.34162	3.34162
8	89	1,482	same	diff	INCORRECT	35	contour038	Song	-2.87033	2.87033
8	36	1,142	diff	diff	CORRECT	35	contour004	Intermediate	3.95277	3.95277
9	102	1,03	same	same	CORRECT	75	contour161	Song	0	0
9	37	1,026	same	same	CORRECT	75	contour078	Intermediate	0	0
9	76	4,043	diff	same	INCORRECT	75	contour155	Speech	0	0
9	26	1,173	same	diff	INCORRECT	75	contour167	Speech	3.67715	3.67715
9	4	0,75	diff	diff	CORRECT	75	contour165	Intermediate	-2.03996	2.03996
9	94	0,583	same	diff	INCORRECT	75	contour165	Song	-1.91035	1.91035
9	112	1,155	same	same	CORRECT	75	contour083	Speech	0	0
9	89	0,649	diff	diff	CORRECT	75	contour167	Song	2.85269	2.85269
9	52	1,241	diff	diff	CORRECT	75	contour130	Intermediate	5.54485	5.54485
9	0	1,045	diff	diff	CORRECT	75	contour010	Song	1.88078	1.88078
9	70	2,269	same	diff	INCORRECT	75	contour161	Speech	3.58032	3.58032
9	6	0,619	same	same	CORRECT	75	contour162	Song	0	0
9	87	0,825	same	same	CORRECT	75	contour010	Intermediate	0	0
9	118	2,928	same	diff	INCORRECT	75	contour152	Intermediate	-5.55534	5.55534
9	75	0,909	same	same	CORRECT	75	contour038	Song	0	0
9	72	1,154	same	same	CORRECT	75	contour161	Intermediate	0	0
9	105	1,548	same	same	CORRECT	75	contour011	Speech	0	0
9	90	0,645	same	same	CORRECT	75	contour049	Speech	0	0
9	14	0,913	diff	diff	CORRECT	75	contour095	Intermediate	4.04506	4.04506
9	81	4,057	same	diff	INCORRECT	75	contour123	Intermediate	-3.93938	3.93938
9	27	1,551	same	diff	INCORRECT	75	contour032	Speech	-1.34554	1.34554
9	58	3,345	same	same	CORRECT	75	contour042	Intermediate	0	0
9	61	0,805	diff	same	INCORRECT	75	contour162	Speech	0	0
9	109	1,23	same	same	CORRECT	75	contour047	Intermediate	0	0
9	68	1,22	same	same	CORRECT	75	contour152	Song	0	0
9	115	1,981	diff	diff	CORRECT	75	contour152	Speech	5.67649	5.67649
9	77	1,355	same	diff	INCORRECT	75	contour025	Intermediate	2.07753	2.07753
9	97	1,345	same	same	CORRECT	75	contour042	Speech	0	0
9	57	1,341	same	same	CORRECT	75	contour099	Intermediate	0	0
9	117	1,021	diff	diff	CORRECT	75	contour025	Song	1.98477	1.98477
9	41	1,676	same	same	CORRECT	75	contour164	Speech	0	0
9	8	1,992	same	diff	INCORRECT	75	contour035	Song	1.98272	1.98272
9	43	1,38	same	same	CORRECT	75	contour133	Song	0	0
9	59	2,015	same	same	CORRECT	75	contour165	Speech	0	0
9	47	0,985	same	same	CORRECT	75	contour017	Song	0	0
9	45	1,317	same	same	CORRECT	75	contour167	Intermediate	0	0
9	108	1,352	same	diff	INCORRECT	75	contour064	Speech	-2.37355	2.37355
9	28	2,73	same	same	CORRECT	75	contour162	Intermediate	0	0
9	5	0,738	same	same	CORRECT	75	contour016	Intermediate	0	0
9	84	1,229	same	diff	INCORRECT	75	contour035	Speech	-5.26655	5.26655
9	55	1,226	same	same	CORRECT	75	contour095	Speech	0	0
9	18	0,616	same	diff	INCORRECT	75	contour037	Intermediate	1.85345	1.85345
9	116	0,707	diff	diff	CORRECT	75	contour064	Song	-5.2574	5.2574
9	111	1,12	same	diff	INCORRECT	75	contour010	Speech	4.65826	4.65826
9	67	1,571	diff	same	INCORRECT	75	contour123	Song	0	0
9	71	1,278	same	same	CORRECT	75	contour106	Speech	0	0
9	42	1,861	same	diff	INCORRECT	75	contour164	Intermediate	-1.96033	1.96033
9	31	2,149	same	diff	INCORRECT	75	contour032	Intermediate	-2.79765	2.79765
9	93	2,71	same	diff	INCORRECT	75	contour017	Speech	4.43206	4.43206
9	110	0,882	same	same	CORRECT	75	contour037	Song	0	0
9	106	1,436	same	same	CORRECT	75	contour114	Speech	0	0
9	48	1,263	diff	diff	CORRECT	75	contour039	Speech	-3.87441	3.87441
9	53	1,156	same	same	CORRECT	75	contour130	Speech	0	0
9	56	1,261	same	same	CORRECT	75	contour130	Song	0	0
9	96	1,994	same	diff	INCORRECT	75	contour163	Intermediate	1.38397	1.38397
9	73	2,512	same	diff	INCORRECT	75	contour163	Song	1.29428	1.29428
9	98	3,374	same	diff	INCORRECT	75	contour164	Song	3.74949	3.74949
9	51	1,172	diff	same	INCORRECT	75	contour016	Song	0	0
9	16	1,899	same	same	CORRECT	75	contour064	Intermediate	0	0
9	88	8,651	same	same	CORRECT	75	contour153	Intermediate	0	0
9	33	0,645	same	same	CORRECT	75	contour174	Intermediate	0	0
9	17	1,257	same	diff	INCORRECT	75	contour095	Song	2.67127	2.67127
9	44	0,977	same	same	CORRECT	75	contour106	Intermediate	0	0
9	104	0,72	diff	diff	CORRECT	75	contour182	Intermediate	-5.52258	5.52258
9	119	1,335	same	diff	INCORRECT	75	contour047	Song	2.13091	2.13091
9	99	1,161	same	same	CORRECT	75	contour189	Intermediate	0	0
9	85	0,692	diff	diff	CORRECT	75	contour053	Speech	1.20203	1.20203
9	22	1,135	same	diff	INCORRECT	75	contour035	Intermediate	1.49424	1.49424
9	74	2,014	same	diff	INCORRECT	75	contour083	Song	2.21799	2.21799
9	54	2,087	same	same	CORRECT	75	contour011	Song	0	0
9	39	0,793	same	same	CORRECT	75	contour053	Intermediate	0	0
9	78	1,796	same	diff	INCORRECT	75	contour182	Song	-1.22359	1.22359
9	32	2,618	same	diff	INCORRECT	75	contour155	Song	-5.24018	5.24018
9	25	1,149	same	same	CORRECT	75	contour078	Song	0	0
9	12	1,148	same	diff	INCORRECT	75	contour106	Song	1.27951	1.27951
9	36	0,948	same	diff	INCORRECT	75	contour153	Song	1.47389	1.47389
9	101	2,99	same	same	CORRECT	75	contour114	Intermediate	0	0
9	62	0,555	diff	diff	CORRECT	75	contour004	Song	-5.19558	5.19558
9	79	0,754	same	same	CORRECT	75	contour049	Song	0	0
9	38	1,539	same	diff	INCORRECT	75	contour163	Speech	2.18061	2.18061
9	95	0,799	same	diff	INCORRECT	75	contour078	Speech	4.01977	4.01977
9	80	1,181	same	diff	INCORRECT	75	contour168	Speech	3.1411	3.1411
9	13	0,446	same	same	CORRECT	75	contour075	Intermediate	0	0
9	24	1,774	same	diff	INCORRECT	75	contour039	Intermediate	-1.88056	1.88056
9	86	1,851	same	same	CORRECT	75	contour004	Intermediate	0	0
9	69	4,476	same	same	CORRECT	75	contour011	Intermediate	0	0
9	21	1,764	diff	same	INCORRECT	75	contour182	Speech	0	0
9	114	0,708	same	same	CORRECT	75	contour075	Speech	0	0
9	60	0,816	same	same	CORRECT	75	contour075	Song	0	0
9	65	2,197	same	diff	INCORRECT	75	contour153	Speech	3.67553	3.67553
9	1	0,71	same	same	CORRECT	75	contour189	Speech	0	0
9	40	1,361	same	same	CORRECT	75	contour114	Song	0	0
9	9	1,192	same	diff	INCORRECT	75	contour155	Intermediate	1.81332	1.81332
9	2	1,21	same	same	CORRECT	75	contour189	Song	0	0
9	30	2,283	same	diff	INCORRECT	75	contour133	Speech	4.13349	4.13349
9	91	3,018	same	diff	INCORRECT	75	contour099	Song	-3.16516	3.16516
9	20	2,327	same	diff	INCORRECT	75	contour017	Intermediate	-1.08046	1.08046
9	113	1,163	diff	diff	CORRECT	75	contour038	Intermediate	2.06174	2.06174
9	35	0,963	same	diff	INCORRECT	75	contour133	Intermediate	3.14672	3.14672
9	107	5,039	same	diff	INCORRECT	75	contour004	Speech	2.24009	2.24009
9	66	0,743	same	same	CORRECT	75	contour168	Song	0	0
9	103	1,256	same	diff	INCORRECT	75	contour083	Intermediate	-2.83781	2.83781
9	63	0,652	same	same	CORRECT	75	contour174	Song	0	0
9	3	1,034	same	diff	INCORRECT	75	contour037	Speech	-1.42611	1.42611
9	82	5,266	same	diff	INCORRECT	75	contour047	Speech	3.64892	3.64892
9	7	1,216	same	same	CORRECT	75	contour025	Speech	0	0
9	23	0,977	same	diff	INCORRECT	75	contour038	Speech	4.06729	4.06729
9	15	1,252	same	same	CORRECT	75	contour099	Speech	0	0
9	34	1,868	same	diff	INCORRECT	75	contour032	Song	-1.73502	1.73502
9	83	1,226	same	diff	INCORRECT	75	contour053	Song	-2.40718	2.40718
9	100	1,147	same	diff	INCORRECT	75	contour200	Speech	1.98524	1.98524
9	50	0,509	same	same	CORRECT	75	contour016	Speech	0	0
9	64	0,943	same	diff	INCORRECT	75	contour168	Intermediate	1.46788	1.46788
9	49	1,208	same	same	CORRECT	75	contour174	Speech	0	0
9	10	0,862	same	diff	INCORRECT	75	contour200	Intermediate	4.5219	4.5219
9	11	1,05	same	diff	INCORRECT	75	contour200	Song	-4.76772	4.76772
9	92	1,083	same	same	CORRECT	75	contour039	Song	0	0
9	29	1,335	same	same	CORRECT	75	contour049	Intermediate	0	0
9	19	2,214	diff	same	INCORRECT	75	contour123	Speech	0	0
9	46	0,852	same	same	CORRECT	75	contour042	Song	0	0
10	75	5,827	diff	same	INCORRECT	71	contour010	Speech	0	0
10	69	2,237	same	diff	INCORRECT	71	contour042	Intermediate	-2.78707	2.78707
10	33	2,51	same	diff	INCORRECT	71	contour035	Song	1.98272	1.98272
10	100	2,95	same	same	CORRECT	71	contour165	Speech	0	0
10	76	3,367	diff	diff	CORRECT	71	contour017	Song	4.42381	4.42381
10	86	3,508	same	same	CORRECT	71	contour189	Song	0	0
10	45	4,225	diff	same	INCORRECT	71	contour174	Song	0	0
10	98	2,56	diff	diff	CORRECT	71	contour155	Speech	-3.07571	3.07571
10	73	3,611	diff	diff	CORRECT	71	contour162	Song	4.48308	4.48308
10	14	2,318	diff	diff	CORRECT	71	contour064	Speech	-2.37355	2.37355
10	15	4,042	same	same	CORRECT	71	contour168	Song	0	0
10	56	2,65	same	diff	INCORRECT	71	contour010	Song	1.88078	1.88078
10	41	7,461	diff	diff	CORRECT	71	contour042	Song	2.86156	2.86156
10	2	3,343	same	same	CORRECT	71	contour049	Song	0	0
10	35	3,792	diff	same	INCORRECT	71	contour064	Intermediate	0	0
10	18	3,106	same	diff	INCORRECT	71	contour039	Speech	-3.87441	3.87441
10	83	2,825	same	diff	INCORRECT	71	contour011	Song	-4.46781	4.46781
10	44	2,606	diff	diff	CORRECT	71	contour137	Speech	4.0314	4.0314
10	9	2,104	same	diff	INCORRECT	71	contour038	Intermediate	2.06174	2.06174
10	77	3,467	same	diff	INCORRECT	71	contour153	Song	1.47389	1.47389
10	95	3,47	diff	diff	CORRECT	71	contour078	Speech	4.01977	4.01977
10	117	4,688	diff	same	INCORRECT	71	contour039	Song	0	0
10	68	4,883	diff	diff	CORRECT	71	contour165	Song	-1.91035	1.91035
10	52	3,052	same	same	CORRECT	71	contour035	Intermediate	0	0
10	97	3,631	same	same	CORRECT	71	contour164	Speech	0	0
10	70	4,978	same	same	CORRECT	71	contour025	Song	0	0
10	115	3,401	same	diff	INCORRECT	71	contour137	Song	1.9048	1.9048
10	12	2,916	diff	diff	CORRECT	71	contour064	Song	-5.2574	5.2574
10	64	3,836	diff	same	INCORRECT	71	contour168	Speech	0	0
10	39	4,338	same	diff	INCORRECT	71	contour016	Speech	2.80436	2.80436
10	105	3,459	diff	diff	CORRECT	71	contour200	Song	-4.76772	4.76772
10	113	2,426	same	same	CORRECT	71	contour078	Song	0	0
10	119	3,119	same	diff	INCORRECT	71	contour010	Intermediate	-5.39966	5.39966
10	1	3,722	same	same	CORRECT	71	contour123	Intermediate	0	0
10	8	3,018	same	same	CORRECT	71	contour114	Speech	0	0
10	79	3,149	same	same	CORRECT	71	contour075	Intermediate	0	0
10	58	3,605	same	diff	INCORRECT	71	contour053	Intermediate	1.81508	1.81508
10	99	2,538	diff	same	INCORRECT	71	contour095	Intermediate	0	0
10	90	3,717	diff	diff	CORRECT	71	contour011	Speech	1.34502	1.34502
10	16	4,979	same	same	CORRECT	71	contour004	Speech	0	0
10	50	4,362	same	same	CORRECT	71	contour047	Song	0	0
10	3	3,902	same	same	CORRECT	71	contour171	Speech	0	0
10	28	2,412	diff	diff	CORRECT	71	contour003	Speech	4.25884	4.25884
10	4	3,207	same	same	CORRECT	71	contour189	Intermediate	0	0
10	62	2,63	diff	diff	CORRECT	71	contour155	Intermediate	1.81332	1.81332
10	30	2,409	diff	diff	CORRECT	71	contour130	Intermediate	5.54485	5.54485
10	17	3,622	diff	same	INCORRECT	71	contour163	Song	0	0
10	63	3,596	diff	same	INCORRECT	71	contour049	Intermediate	0	0
10	25	2,573	diff	diff	CORRECT	71	contour174	Intermediate	-3.7986	3.7986
10	38	7,879	diff	diff	CORRECT	71	contour164	Song	3.74949	3.74949
10	19	2,534	same	same	CORRECT	71	contour114	Intermediate	0	0
10	22	4,242	same	diff	INCORRECT	71	contour150	Song	-4.73544	4.73544
10	31	3,369	same	diff	INCORRECT	71	contour150	Speech	-4.83777	4.83777
10	108	3,666	same	same	CORRECT	71	contour155	Song	0	0
10	57	3,224	diff	diff	CORRECT	71	contour035	Speech	-5.26655	5.26655
10	6	4,243	diff	diff	CORRECT	71	contour133	Intermediate	3.14672	3.14672
10	47	2,416	same	same	CORRECT	71	contour161	Speech	0	0
10	42	2,121	same	diff	INCORRECT	71	contour174	Speech	4.26269	4.26269
10	116	2,43	same	diff	INCORRECT	71	contour016	Intermediate	-2.04804	2.04804
10	74	2,281	diff	diff	CORRECT	71	contour168	Intermediate	1.46788	1.46788
10	66	2,724	same	same	CORRECT	71	contour078	Intermediate	0	0
10	91	4,683	same	diff	INCORRECT	71	contour171	Intermediate	2.86576	2.86576
10	32	2,905	same	same	CORRECT	71	contour025	Speech	0	0
10	109	3,247	diff	same	INCORRECT	71	contour077	Song	0	0
10	0	2,505	diff	same	INCORRECT	71	contour153	Speech	0	0
10	80	2,402	same	same	CORRECT	71	contour095	Song	0	0
10	112	3,113	diff	same	INCORRECT	71	contour162	Speech	0	0
10	111	2,26	same	same	CORRECT	71	contour038	Song	0	0
10	59	2,548	same	same	CORRECT	71	contour025	Intermediate	0	0
10	93	3,138	same	diff	INCORRECT	71	contour003	Song	4.82641	4.82641
10	46	2,933	diff	diff	CORRECT	71	contour163	Intermediate	1.38397	1.38397
10	54	2,757	diff	same	INCORRECT	71	contour161	Intermediate	0	0
10	53	2,384	same	same	CORRECT	71	contour004	Intermediate	0	0
10	27	4,831	same	same	CORRECT	71	contour163	Speech	0	0
10	23	5,44	diff	same	INCORRECT	71	contour152	Speech	0	0
10	104	2,315	same	diff	INCORRECT	71	contour038	Speech	4.06729	4.06729
10	71	2,215	same	same	CORRECT	71	contour130	Song	0	0
10	10	2,645	diff	diff	CORRECT	71	contour167	Intermediate	-3.43158	3.43158
10	67	4,716	same	same	CORRECT	71	contour077	Speech	0	0
10	43	2,151	same	same	CORRECT	71	contour137	Intermediate	0	0
10	84	2,925	same	same	CORRECT	71	contour049	Speech	0	0
10	101	4,307	same	same	CORRECT	71	contour039	Intermediate	0	0
10	49	2,329	diff	same	INCORRECT	71	contour167	Speech	0	0
10	110	2,329	diff	same	INCORRECT	71	contour182	Speech	0	0
10	72	2,62	diff	diff	CORRECT	71	contour004	Song	-5.19558	5.19558
10	51	2,673	diff	diff	CORRECT	71	contour165	Intermediate	-2.03996	2.03996
10	88	3,732	same	same	CORRECT	71	contour164	Intermediate	0	0
10	37	2,376	diff	diff	CORRECT	71	contour077	Intermediate	5.65269	5.65269
10	34	3,184	same	same	CORRECT	71	contour153	Intermediate	0	0
10	5	3,498	diff	same	INCORRECT	71	contour047	Speech	0	0
10	89	3,436	diff	same	INCORRECT	71	contour075	Song	0	0
10	11	3,908	same	same	CORRECT	71	contour150	Intermediate	0	0
10	24	3,37	diff	diff	CORRECT	71	contour161	Song	1.99204	1.99204
10	96	4,773	diff	same	INCORRECT	71	contour182	Song	0	0
10	103	3,521	same	same	CORRECT	71	contour123	Song	0	0
10	92	3,023	same	same	CORRECT	71	contour182	Intermediate	0	0
10	102	2,411	diff	diff	CORRECT	71	contour130	Speech	5.6717	5.6717
10	82	3,237	same	diff	INCORRECT	71	contour095	Speech	-1.59891	1.59891
10	48	3,674	diff	diff	CORRECT	71	contour047	Intermediate	5.52934	5.52934
10	118	4,622	diff	diff	CORRECT	71	contour152	Song	3.95252	3.95252
10	55	2,269	diff	diff	CORRECT	71	contour152	Intermediate	-5.55534	5.55534
10	61	2,36	same	same	CORRECT	71	contour053	Song	0	0
10	107	2,504	same	diff	INCORRECT	71	contour114	Song	3.57851	3.57851
10	114	2,038	same	same	CORRECT	71	contour171	Song	0	0
10	7	2,786	same	same	CORRECT	71	contour162	Intermediate	0	0
10	20	2,065	diff	diff	CORRECT	71	contour042	Speech	3.02936	3.02936
10	13	3,053	same	diff	INCORRECT	71	contour200	Intermediate	4.5219	4.5219
10	26	3,574	diff	same	INCORRECT	71	contour133	Speech	0	0
10	40	2,129	same	diff	INCORRECT	71	contour053	Speech	1.20203	1.20203
10	94	3,94	same	diff	INCORRECT	71	contour200	Speech	1.98524	1.98524
10	106	2,297	same	diff	INCORRECT	71	contour016	Song	-1.27547	1.27547
10	60	5,986	diff	diff	CORRECT	71	contour189	Speech	-1.93467	1.93467
10	21	1,776	same	diff	INCORRECT	71	contour003	Intermediate	4.60981	4.60981
10	81	2,088	same	diff	INCORRECT	71	contour123	Speech	-2.54352	2.54352
10	29	3,62	diff	same	INCORRECT	71	contour011	Intermediate	0	0
10	65	2,322	same	same	CORRECT	71	contour017	Speech	0	0
10	85	2,329	same	diff	INCORRECT	71	contour017	Intermediate	-1.08046	1.08046
10	36	2,999	diff	diff	CORRECT	71	contour075	Speech	-2.1487	2.1487
10	87	2,384	same	same	CORRECT	71	contour133	Song	0	0
10	78	2,26	same	diff	INCORRECT	71	contour167	Song	2.85269	2.85269
11	106	2,258	diff	diff	CORRECT	80	contour039	Speech	-3.87441	3.87441
11	20	2,066	same	same	CORRECT	80	contour078	Intermediate	0	0
11	10	3,396	same	same	CORRECT	80	contour049	Song	0	0
11	119	1,319	same	same	CORRECT	80	contour114	Speech	0	0
11	99	1,428	same	same	CORRECT	80	contour039	Intermediate	0	0
11	59	1,507	diff	diff	CORRECT	80	contour011	Song	-4.46781	4.46781
11	3	1,411	same	same	CORRECT	80	contour047	Intermediate	0	0
11	89	0,894	diff	same	INCORRECT	80	contour075	Speech	0	0
11	83	1,545	same	diff	INCORRECT	80	contour130	Speech	5.6717	5.6717
11	109	3,064	same	diff	INCORRECT	80	contour047	Speech	3.64892	3.64892
11	56	2,482	same	diff	INCORRECT	80	contour064	Speech	-2.37355	2.37355
11	76	1,653	same	diff	INCORRECT	80	contour075	Intermediate	4.92376	4.92376
11	82	1,329	diff	diff	CORRECT	80	contour106	Intermediate	1.33333	1.33333
11	4	7,319	same	diff	INCORRECT	80	contour039	Song	2.75129	2.75129
11	18	2,566	diff	diff	CORRECT	80	contour035	Intermediate	1.49424	1.49424
11	86	1,08	same	diff	INCORRECT	80	contour106	Song	1.27951	1.27951
11	66	1,742	same	diff	INCORRECT	80	contour010	Intermediate	-5.39966	5.39966
11	94	1,15	same	diff	INCORRECT	80	contour137	Song	1.9048	1.9048
11	85	2,432	diff	diff	CORRECT	80	contour133	Speech	4.13349	4.13349
11	44	1,388	same	same	CORRECT	80	contour137	Intermediate	0	0
11	92	2,464	diff	diff	CORRECT	80	contour114	Song	3.57851	3.57851
11	21	1,227	diff	diff	CORRECT	80	contour182	Intermediate	-5.52258	5.52258
11	118	0,967	diff	diff	CORRECT	80	contour095	Intermediate	4.04506	4.04506
11	68	1,455	same	diff	INCORRECT	80	contour095	Speech	-1.59891	1.59891
11	93	1,044	same	diff	INCORRECT	80	contour123	Speech	-2.54352	2.54352
11	23	2,002	diff	diff	CORRECT	80	contour155	Song	-5.24018	5.24018
11	49	1,289	same	diff	INCORRECT	80	contour161	Song	1.99204	1.99204
11	96	1,716	same	diff	INCORRECT	80	contour010	Speech	4.65826	4.65826
11	61	3,294	same	diff	INCORRECT	80	contour165	Song	-1.91035	1.91035
11	97	1,008	same	diff	INCORRECT	80	contour003	Speech	4.25884	4.25884
11	13	1,466	same	diff	INCORRECT	80	contour064	Intermediate	-5.25313	5.25313
11	112	1,418	same	same	CORRECT	80	contour032	Speech	0	0
11	78	5,569	diff	same	INCORRECT	80	contour032	Song	0	0
11	54	1,889	diff	same	INCORRECT	80	contour042	Song	0	0
11	47	1,874	diff	diff	CORRECT	80	contour038	Intermediate	2.06174	2.06174
11	105	1,074	same	diff	INCORRECT	80	contour155	Speech	-3.07571	3.07571
11	115	3,378	same	same	CORRECT	80	contour165	Intermediate	0	0
11	95	1,08	diff	diff	CORRECT	80	contour042	Intermediate	-2.78707	2.78707
11	64	2,438	same	diff	INCORRECT	80	contour174	Speech	4.26269	4.26269
11	41	1,157	same	same	CORRECT	80	contour078	Speech	0	0
12	62	1,086	diff	diff	CORRECT	76	contour038	Song	-2.87033	2.87033
12	65	2,269	same	diff	INCORRECT	76	contour106	Speech	-2.1815	2.1815
12	10	2,282	diff	diff	CORRECT	76	contour078	Speech	4.01977	4.01977
12	92	0,834	diff	diff	CORRECT	76	contour137	Song	1.9048	1.9048
12	70	1,074	diff	diff	CORRECT	76	contour039	Song	2.75129	2.75129
12	66	2,266	same	diff	INCORRECT	76	contour083	Speech	-1.4467	1.4467
12	76	0,904	diff	diff	CORRECT	76	contour174	Speech	4.26269	4.26269
12	90	5,373	same	same	CORRECT	76	contour133	Song	0	0
12	15	3,51	diff	diff	CORRECT	76	contour165	Intermediate	-2.03996	2.03996
12	28	0,774	diff	diff	CORRECT	76	contour032	Song	-1.73502	1.73502
12	107	3,334	same	diff	INCORRECT	76	contour163	Speech	2.18061	2.18061
12	14	1,022	diff	diff	CORRECT	76	contour003	Intermediate	4.60981	4.60981
12	11	5,837	diff	same	INCORRECT	76	contour114	Intermediate	0	0
12	116	1,14	diff	diff	CORRECT	76	contour016	Speech	2.80436	2.80436
12	79	2,206	same	same	CORRECT	76	contour037	Intermediate	0	0
12	53	4,021	diff	diff	CORRECT	76	contour123	Intermediate	-3.93938	3.93938
12	9	1,436	same	same	CORRECT	76	contour133	Intermediate	0	0
12	43	1,066	diff	diff	CORRECT	76	contour016	Song	-1.27547	1.27547
12	30	1,888	same	diff	INCORRECT	76	contour095	Speech	-1.59891	1.59891
12	89	0,937	same	same	CORRECT	76	contour003	Speech	0	0
12	64	1,093	diff	diff	CORRECT	76	contour171	Intermediate	2.86576	2.86576
12	8	0,968	diff	diff	CORRECT	76	contour049	Intermediate	4.54933	4.54933
12	21	6,136	same	same	CORRECT	76	contour168	Speech	0	0
12	37	1,429	same	diff	INCORRECT	76	contour010	Intermediate	-5.39966	5.39966
12	39	2,501	same	same	CORRECT	76	contour037	Speech	0	0
12	85	2,785	diff	same	INCORRECT	76	contour053	Intermediate	0	0
12	94	2,621	same	same	CORRECT	76	contour047	Speech	0	0
12	80	1,424	diff	diff	CORRECT	76	contour032	Intermediate	-2.79765	2.79765
12	50	0,884	diff	diff	CORRECT	76	contour167	Intermediate	-3.43158	3.43158
12	5	0,87	diff	diff	CORRECT	76	contour042	Song	2.86156	2.86156
12	114	3,542	same	same	CORRECT	76	contour038	Intermediate	0	0
12	26	1,78	same	same	CORRECT	76	contour174	Song	0	0
12	41	1,355	diff	diff	CORRECT	76	contour161	Speech	3.58032	3.58032
12	108	0,511	diff	diff	CORRECT	76	contour042	Speech	3.02936	3.02936
12	0	1,241	same	diff	INCORRECT	76	contour114	Speech	-1.52123	1.52123
12	33	0,913	same	same	CORRECT	76	contour049	Speech	0	0
12	56	0,952	diff	diff	CORRECT	76	contour182	Intermediate	-5.52258	5.52258
12	87	0,836	same	same	CORRECT	76	contour075	Intermediate	0	0
12	61	2,243	diff	diff	CORRECT	76	contour123	Song	-2.82473	2.82473
12	27	1,228	same	same	CORRECT	76	contour153	Song	0	0
12	84	0,916	diff	same	INCORRECT	76	contour004	Song	0	0
12	51	4,914	diff	same	INCORRECT	76	contour099	Speech	0	0
12	38	3,473	same	same	CORRECT	76	contour152	Speech	0	0
12	34	2,071	same	diff	INCORRECT	76	contour011	Song	-4.46781	4.46781
12	59	1,015	diff	diff	CORRECT	76	contour038	Speech	4.06729	4.06729
12	7	2,31	diff	same	INCORRECT	76	contour037	Song	0	0
12	73	4,1	same	diff	INCORRECT	76	contour189	Speech	-1.93467	1.93467
12	112	1,526	same	same	CORRECT	76	contour106	Intermediate	0	0
12	78	3,021	diff	same	INCORRECT	76	contour200	Intermediate	0	0
12	67	1,391	diff	diff	CORRECT	76	contour167	Song	2.85269	2.85269
12	46	1,207	same	diff	INCORRECT	76	contour053	Speech	1.20203	1.20203
12	49	1,818	same	same	CORRECT	76	contour130	Song	0	0
12	44	2,626	same	same	CORRECT	76	contour083	Song	0	0
12	35	2,707	diff	same	INCORRECT	76	contour168	Intermediate	0	0
12	106	3,76	diff	diff	CORRECT	76	contour039	Speech	-3.87441	3.87441
12	4	1,407	same	same	CORRECT	76	contour047	Song	0	0
12	98	2,619	diff	same	INCORRECT	76	contour011	Intermediate	0	0
12	77	2,561	same	same	CORRECT	76	contour123	Speech	0	0
12	25	0,858	diff	diff	CORRECT	76	contour189	Intermediate	1.37025	1.37025
12	97	4,267	diff	same	INCORRECT	76	contour155	Song	0	0
12	110	3,985	diff	same	INCORRECT	76	contour099	Song	0	0
12	57	0,942	diff	diff	CORRECT	76	contour163	Intermediate	1.38397	1.38397
12	32	0,827	diff	same	INCORRECT	76	contour150	Intermediate	0	0
12	117	1,012	diff	diff	CORRECT	76	contour049	Song	2.0279	2.0279
12	42	0,826	same	same	CORRECT	76	contour095	Intermediate	0	0
12	88	0,876	diff	same	INCORRECT	76	contour150	Speech	0	0
12	19	1,091	diff	diff	CORRECT	76	contour010	Song	1.88078	1.88078
12	86	7,448	same	diff	INCORRECT	76	contour053	Song	-2.40718	2.40718
12	18	2,381	same	same	CORRECT	76	contour016	Intermediate	0	0
12	13	3,603	same	same	CORRECT	76	contour155	Intermediate	0	0
12	115	0,928	diff	diff	CORRECT	76	contour083	Intermediate	-2.83781	2.83781
12	69	3,55	same	same	CORRECT	76	contour168	Song	0	0
12	103	1,042	same	same	CORRECT	76	contour182	Song	0	0
12	102	0,757	diff	diff	CORRECT	76	contour189	Song	5.26882	5.26882
12	75	1,373	diff	diff	CORRECT	76	contour137	Speech	4.0314	4.0314
12	95	2,631	same	same	CORRECT	76	contour153	Intermediate	0	0
12	48	1,793	diff	diff	CORRECT	76	contour010	Speech	4.65826	4.65826
12	81	0,617	diff	diff	CORRECT	76	contour133	Speech	4.13349	4.13349
12	72	0,822	same	same	CORRECT	76	contour171	Song	0	0
12	45	1,031	same	same	CORRECT	76	contour047	Intermediate	0	0
12	113	1,095	diff	diff	CORRECT	76	contour152	Intermediate	-5.55534	5.55534
12	2	1,335	same	same	CORRECT	76	contour099	Intermediate	0	0
12	60	0,904	diff	diff	CORRECT	76	contour130	Intermediate	5.54485	5.54485
12	93	0,64	diff	diff	CORRECT	76	contour155	Speech	-3.07571	3.07571
12	40	0,98	diff	same	INCORRECT	76	contour032	Speech	0	0
12	1	1,155	same	same	CORRECT	76	contour130	Speech	0	0
12	101	0,901	diff	diff	CORRECT	76	contour137	Intermediate	3.11261	3.11261
12	17	0,777	same	same	CORRECT	76	contour182	Speech	0	0
12	29	2,261	same	same	CORRECT	76	contour171	Speech	0	0
12	16	0,745	diff	diff	CORRECT	76	contour163	Song	1.29428	1.29428
12	99	3,155	same	same	CORRECT	76	contour200	Speech	0	0
12	22	3,1	same	same	CORRECT	76	contour167	Speech	0	0
12	119	1,875	diff	diff	CORRECT	76	contour017	Intermediate	-1.08046	1.08046
12	24	0,947	diff	diff	CORRECT	76	contour161	Song	1.99204	1.99204
12	104	0,607	diff	diff	CORRECT	76	contour095	Song	2.67127	2.67127
12	83	0,736	diff	diff	CORRECT	76	contour075	Song	-2.69624	2.69624
12	55	1,219	same	same	CORRECT	76	contour004	Intermediate	0	0
12	58	1,568	same	diff	INCORRECT	76	contour165	Song	-1.91035	1.91035
12	20	4,36	diff	same	INCORRECT	76	contour004	Speech	0	0
12	12	2,381	same	same	CORRECT	76	contour003	Song	0	0
12	111	1,951	same	same	CORRECT	76	contour114	Song	0	0
12	3	4,822	same	same	CORRECT	76	contour017	Song	0	0
12	47	2,074	diff	same	INCORRECT	76	contour152	Song	0	0
12	91	2,223	diff	diff	CORRECT	76	contour017	Speech	4.43206	4.43206
12	6	0,689	diff	same	INCORRECT	76	contour150	Song	0	0
12	109	2,414	diff	diff	CORRECT	76	contour078	Song	-5.96438	5.96438
12	23	2,026	diff	diff	CORRECT	76	contour078	Intermediate	-5.31024	5.31024
12	118	1,81	diff	same	INCORRECT	76	contour106	Song	0	0
12	52	2,719	same	same	CORRECT	76	contour011	Speech	0	0
12	82	2,038	same	diff	INCORRECT	76	contour165	Speech	-1.46132	1.46132
12	31	0,506	diff	diff	CORRECT	76	contour174	Intermediate	-3.7986	3.7986
12	54	5,623	diff	same	INCORRECT	76	contour064	Speech	0	0
12	63	0,771	diff	diff	CORRECT	76	contour039	Intermediate	-1.88056	1.88056
12	96	0,684	diff	diff	CORRECT	76	contour064	Song	-5.2574	5.2574
12	105	1,357	same	same	CORRECT	76	contour075	Speech	0	0
12	74	5,96	diff	same	INCORRECT	76	contour153	Speech	0	0
12	100	1,621	same	same	CORRECT	76	contour161	Intermediate	0	0
12	71	1,987	same	same	CORRECT	76	contour064	Intermediate	0	0
12	36	1,024	diff	same	INCORRECT	76	contour200	Song	0	0
12	68	1,137	diff	diff	CORRECT	76	contour042	Intermediate	-2.78707	2.78707
13	96	1,393	same	same	CORRECT	90	contour171	Speech	0	0
13	91	1,272	diff	same	INCORRECT	90	contour182	Song	0	0
13	106	1,013	diff	diff	CORRECT	90	contour004	Speech	2.24009	2.24009
13	54	0,668	diff	diff	CORRECT	90	contour095	Song	2.67127	2.67127
13	3	1,264	diff	diff	CORRECT	90	contour083	Song	2.21799	2.21799
13	112	2,538	same	diff	INCORRECT	90	contour025	Song	1.98477	1.98477
13	39	1,271	diff	diff	CORRECT	90	contour123	Song	-2.82473	2.82473
13	109	1,636	diff	same	INCORRECT	90	contour133	Speech	0	0
13	13	0,88	diff	diff	CORRECT	90	contour038	Speech	4.06729	4.06729
13	87	1,171	same	diff	INCORRECT	90	contour016	Speech	2.80436	2.80436
13	86	1,813	same	same	CORRECT	90	contour038	Song	0	0
13	68	0,821	diff	diff	CORRECT	90	contour004	Song	-5.19558	5.19558
13	44	1,49	same	diff	INCORRECT	90	contour037	Speech	-1.42611	1.42611
13	113	2,403	diff	same	INCORRECT	90	contour189	Song	0	0
13	62	1,918	diff	diff	CORRECT	90	contour032	Speech	-1.34554	1.34554
13	21	0,801	same	same	CORRECT	90	contour095	Speech	0	0
13	73	0,732	same	same	CORRECT	90	contour161	Song	0	0
13	61	0,694	same	same	CORRECT	90	contour095	Intermediate	0	0
13	59	0,97	diff	diff	CORRECT	90	contour003	Song	4.82641	4.82641
13	119	0,797	same	same	CORRECT	90	contour155	Speech	0	0
13	43	2,004	same	same	CORRECT	90	contour165	Song	0	0
13	110	1,055	diff	diff	CORRECT	90	contour025	Speech	-4.50184	4.50184
13	79	1,33	same	diff	INCORRECT	90	contour016	Intermediate	-2.04804	2.04804
13	15	0,824	diff	diff	CORRECT	90	contour003	Speech	4.25884	4.25884
13	103	5,107	diff	diff	CORRECT	90	contour171	Intermediate	2.86576	2.86576
13	75	3,336	diff	same	INCORRECT	90	contour017	Intermediate	0	0
13	82	1,338	diff	diff	CORRECT	90	contour047	Intermediate	5.52934	5.52934
13	51	1,298	same	diff	INCORRECT	90	contour152	Speech	5.67649	5.67649
13	19	1,132	same	same	CORRECT	90	contour161	Intermediate	0	0
13	108	0,737	same	same	CORRECT	90	contour153	Song	0	0
13	34	0,812	diff	diff	CORRECT	90	contour010	Song	1.88078	1.88078
13	22	1,056	same	same	CORRECT	90	contour137	Speech	0	0
13	36	0,593	same	same	CORRECT	90	contour075	Speech	0	0
13	80	1,103	same	same	CORRECT	90	contour167	Song	0	0
13	12	1,217	same	same	CORRECT	90	contour152	Intermediate	0	0
13	89	1,201	same	same	CORRECT	90	contour150	Speech	0	0
13	53	0,721	diff	same	INCORRECT	90	contour123	Intermediate	0	0
13	70	1,261	diff	same	INCORRECT	90	contour155	Intermediate	0	0
13	45	2,298	diff	same	INCORRECT	90	contour114	Song	0	0
13	6	0,828	diff	diff	CORRECT	90	contour174	Intermediate	-3.7986	3.7986
13	81	5,185	diff	same	INCORRECT	90	contour083	Intermediate	0	0
13	65	0,875	diff	diff	CORRECT	90	contour039	Speech	-3.87441	3.87441
13	2	0,791	diff	diff	CORRECT	90	contour174	Song	1.10675	1.10675
13	7	0,766	diff	diff	CORRECT	90	contour010	Speech	4.65826	4.65826
13	74	0,69	diff	diff	CORRECT	90	contour011	Intermediate	-4.94278	4.94278
13	38	1,106	diff	same	INCORRECT	90	contour016	Song	0	0
13	28	1,127	same	same	CORRECT	90	contour042	Speech	0	0
13	84	1,022	diff	diff	CORRECT	90	contour165	Speech	-1.46132	1.46132
13	63	1,22	diff	diff	CORRECT	90	contour164	Song	3.74949	3.74949
13	0	0,686	diff	diff	CORRECT	90	contour133	Song	4.57916	4.57916
13	100	0,87	diff	same	INCORRECT	90	contour053	Intermediate	0	0
13	115	0,884	diff	diff	CORRECT	90	contour047	Speech	3.64892	3.64892
13	97	0,769	same	same	CORRECT	90	contour011	Song	0	0
13	20	0,767	diff	diff	CORRECT	90	contour152	Song	3.95252	3.95252
13	41	0,79	same	same	CORRECT	90	contour035	Song	0	0
13	14	3,286	diff	diff	CORRECT	90	contour168	Speech	3.1411	3.1411
13	8	0,828	diff	same	INCORRECT	90	contour053	Speech	0	0
13	117	0,59	diff	diff	CORRECT	90	contour167	Speech	3.67715	3.67715
13	35	1,096	diff	diff	CORRECT	90	contour053	Song	-2.40718	2.40718
13	90	1,271	same	same	CORRECT	90	contour039	Song	0	0
13	72	0,97	diff	same	INCORRECT	90	contour017	Speech	0	0
13	23	0,816	diff	diff	CORRECT	90	contour004	Intermediate	3.95277	3.95277
13	98	0,896	diff	diff	CORRECT	90	contour182	Speech	5.8125	5.8125
13	40	1,162	diff	diff	CORRECT	90	contour035	Intermediate	1.49424	1.49424
13	52	0,833	diff	diff	CORRECT	90	contour064	Song	-5.2574	5.2574
13	31	0,853	diff	diff	CORRECT	90	contour164	Intermediate	-1.96033	1.96033
13	4	0,978	diff	same	INCORRECT	90	contour162	Song	0	0
13	107	1,036	diff	diff	CORRECT	90	contour168	Song	-2.66717	2.66717
13	27	0,989	same	diff	INCORRECT	90	contour123	Speech	-2.54352	2.54352
13	66	0,904	diff	diff	CORRECT	90	contour168	Intermediate	1.46788	1.46788
13	33	0,979	same	same	CORRECT	90	contour161	Speech	0	0
13	46	2,094	same	same	CORRECT	90	contour035	Speech	0	0
13	69	1,166	diff	diff	CORRECT	90	contour167	Intermediate	-3.43158	3.43158
13	56	1,227	diff	diff	CORRECT	90	contour200	Speech	1.98524	1.98524
13	1	1,08	same	same	CORRECT	90	contour078	Song	0	0
13	30	0,794	diff	diff	CORRECT	90	contour017	Song	4.42381	4.42381
13	55	0,853	diff	same	INCORRECT	90	contour064	Intermediate	0	0
13	32	0,924	diff	same	INCORRECT	90	contour150	Song	0	0
13	101	1,151	same	same	CORRECT	90	contour077	Speech	0	0
13	37	1,675	diff	same	INCORRECT	90	contour064	Speech	0	0
13	76	1,786	same	same	CORRECT	90	contour164	Speech	0	0
13	77	0,953	diff	diff	CORRECT	90	contour042	Intermediate	-2.78707	2.78707
13	16	2,18	diff	same	INCORRECT	90	contour083	Speech	0	0
13	49	1,266	same	diff	INCORRECT	90	contour011	Speech	1.34502	1.34502
13	17	0,803	diff	same	INCORRECT	90	contour032	Intermediate	0	0
13	102	1,344	diff	diff	CORRECT	90	contour075	Intermediate	4.92376	4.92376
13	60	1,004	diff	diff	CORRECT	90	contour032	Song	-1.73502	1.73502
13	94	1,415	diff	same	INCORRECT	90	contour133	Intermediate	0	0
13	88	1,405	diff	diff	CORRECT	90	contour189	Intermediate	1.37025	1.37025
13	10	2,054	diff	diff	CORRECT	90	contour165	Intermediate	-2.03996	2.03996
13	11	1,271	diff	diff	CORRECT	90	contour003	Intermediate	4.60981	4.60981
13	67	1,135	diff	same	INCORRECT	90	contour137	Song	0	0
13	118	0,882	diff	diff	CORRECT	90	contour155	Song	-5.24018	5.24018
13	92	1,078	same	same	CORRECT	90	contour010	Intermediate	0	0
13	105	1,092	same	same	CORRECT	90	contour114	Intermediate	0	0
13	18	1,335	diff	same	INCORRECT	90	contour037	Song	0	0
13	95	0,83	diff	diff	CORRECT	90	contour038	Intermediate	2.06174	2.06174
13	42	1,515	same	same	CORRECT	90	contour189	Speech	0	0
13	85	2,257	diff	same	INCORRECT	90	contour174	Speech	0	0
13	71	0,875	same	same	CORRECT	90	contour025	Intermediate	0	0
13	48	1,194	diff	diff	CORRECT	90	contour078	Intermediate	-5.31024	5.31024
13	93	1,121	diff	same	INCORRECT	90	contour037	Intermediate	0	0
13	83	1,307	same	diff	INCORRECT	90	contour047	Song	2.13091	2.13091
13	116	1,168	diff	diff	CORRECT	90	contour114	Speech	-1.52123	1.52123
13	111	0,962	diff	diff	CORRECT	90	contour078	Speech	4.01977	4.01977
13	26	0,987	same	same	CORRECT	90	contour077	Intermediate	0	0
13	50	1,228	same	same	CORRECT	90	contour042	Song	0	0
13	104	3,764	diff	diff	CORRECT	90	contour150	Intermediate	-2.4645	2.4645
13	24	0,862	diff	diff	CORRECT	90	contour171	Song	-5.73783	5.73783
13	99	1,486	same	same	CORRECT	90	contour039	Intermediate	0	0
13	47	0,907	diff	diff	CORRECT	90	contour182	Intermediate	-5.52258	5.52258
13	29	1,074	same	same	CORRECT	90	contour162	Speech	0	0
13	5	1,342	same	same	CORRECT	90	contour200	Song	0	0
13	78	0,853	same	same	CORRECT	90	contour200	Intermediate	0	0
13	57	0,754	diff	diff	CORRECT	90	contour077	Song	3.95768	3.95768
13	64	0,907	same	same	CORRECT	90	contour137	Intermediate	0	0
13	25	4,35	diff	same	INCORRECT	90	contour162	Intermediate	0	0
13	9	1,18	diff	same	INCORRECT	90	contour153	Speech	0	0
13	114	0,832	diff	diff	CORRECT	90	contour153	Intermediate	3.77205	3.77205
13	58	1,295	same	same	CORRECT	90	contour075	Song	0	0
14	38	1,103	diff	diff	CORRECT	81	contour133	Speech	4.13349	4.13349
14	56	1,519	diff	diff	CORRECT	81	contour095	Speech	-1.59891	1.59891
14	64	0,962	diff	diff	CORRECT	81	contour130	Intermediate	5.54485	5.54485
14	87	0,696	same	same	CORRECT	81	contour163	Intermediate	0	0
14	72	0,422	diff	same	INCORRECT	81	contour171	Intermediate	0	0
14	46	0,682	same	same	CORRECT	81	contour047	Intermediate	0	0
14	60	1,154	same	diff	INCORRECT	81	contour078	Intermediate	-5.31024	5.31024
14	58	1,281	diff	diff	CORRECT	81	contour167	Intermediate	-3.43158	3.43158
14	93	0,723	same	same	CORRECT	81	contour038	Song	0	0
14	85	3,196	same	diff	INCORRECT	81	contour165	Song	-1.91035	1.91035
14	110	1,123	same	same	CORRECT	81	contour083	Intermediate	0	0
14	51	1,226	diff	diff	CORRECT	81	contour133	Song	4.57916	4.57916
14	39	1,06	same	diff	INCORRECT	81	contour130	Song	3.34162	3.34162
14	43	2,249	same	diff	INCORRECT	81	contour016	Intermediate	-2.04804	2.04804
14	96	1,129	same	diff	INCORRECT	81	contour167	Song	2.85269	2.85269
14	109	0,677	diff	diff	CORRECT	81	contour077	Intermediate	5.65269	5.65269
14	68	0,812	same	same	CORRECT	81	contour004	Speech	0	0
14	59	1,014	diff	diff	CORRECT	81	contour064	Speech	-2.37355	2.37355
14	63	1,169	same	same	CORRECT	81	contour189	Song	0	0
14	65	1,163	same	same	CORRECT	81	contour106	Speech	0	0
14	78	2,432	same	same	CORRECT	81	contour133	Intermediate	0	0
14	70	0,517	diff	diff	CORRECT	81	contour035	Speech	-5.26655	5.26655
14	48	0,724	diff	diff	CORRECT	81	contour042	Song	2.86156	2.86156
14	10	1,257	same	same	CORRECT	81	contour162	Speech	0	0
14	118	1,051	same	same	CORRECT	81	contour083	Speech	0	0
14	22	2,955	diff	same	INCORRECT	81	contour004	Song	0	0
14	117	1,046	same	diff	INCORRECT	81	contour035	Intermediate	1.49424	1.49424
14	1	1,556	same	same	CORRECT	81	contour161	Intermediate	0	0
14	69	2,666	same	same	CORRECT	81	contour025	Song	0	0
14	12	0,678	same	same	CORRECT	81	contour049	Speech	0	0
14	101	1,592	same	same	CORRECT	81	contour017	Song	0	0
14	44	1,179	diff	diff	CORRECT	81	contour165	Intermediate	-2.03996	2.03996
14	53	2,156	same	same	CORRECT	81	contour167	Speech	0	0
14	113	1,299	same	same	CORRECT	81	contour003	Intermediate	0	0
14	40	1,038	diff	diff	CORRECT	81	contour200	Speech	1.98524	1.98524
14	94	0,862	diff	same	INCORRECT	81	contour163	Speech	0	0
14	77	2,244	same	same	CORRECT	81	contour078	Song	0	0
14	4	1,657	same	diff	INCORRECT	81	contour010	Speech	4.65826	4.65826
14	34	0,506	diff	diff	CORRECT	81	contour114	Song	3.57851	3.57851
14	28	1,354	same	same	CORRECT	81	contour047	Song	0	0
14	106	1,306	diff	diff	CORRECT	81	contour078	Speech	4.01977	4.01977
14	66	1,004	same	same	CORRECT	81	contour037	Song	0	0
14	41	1,169	diff	diff	CORRECT	81	contour016	Speech	2.80436	2.80436
14	49	0,728	diff	diff	CORRECT	81	contour153	Song	1.47389	1.47389
14	35	0,605	same	same	CORRECT	81	contour130	Speech	0	0
14	0	1,067	diff	diff	CORRECT	81	contour053	Song	-2.40718	2.40718
14	97	0,959	same	same	CORRECT	81	contour162	Intermediate	0	0
14	11	1,814	same	same	CORRECT	81	contour114	Speech	0	0
14	89	2,621	diff	diff	CORRECT	81	contour123	Song	-2.82473	2.82473
14	21	0,879	same	same	CORRECT	81	contour106	Intermediate	0	0
14	36	1,279	diff	diff	CORRECT	81	contour182	Intermediate	-5.52258	5.52258
14	73	0,713	same	same	CORRECT	81	contour123	Speech	0	0
14	26	0,539	same	same	CORRECT	81	contour095	Song	0	0
14	98	1,156	diff	diff	CORRECT	81	contour189	Intermediate	1.37025	1.37025
14	108	2,235	same	same	CORRECT	81	contour032	Intermediate	0	0
14	7	0,912	same	same	CORRECT	81	contour047	Speech	0	0
14	15	0,663	diff	same	INCORRECT	81	contour168	Intermediate	0	0
14	19	1,028	same	same	CORRECT	81	contour137	Intermediate	0	0
14	76	1,673	same	diff	INCORRECT	81	contour037	Speech	-1.42611	1.42611
14	54	0,857	same	same	CORRECT	81	contour011	Speech	0	0
14	23	0,539	diff	diff	CORRECT	81	contour163	Song	1.29428	1.29428
14	112	0,769	diff	diff	CORRECT	81	contour077	Song	3.95768	3.95768
14	25	1,214	same	same	CORRECT	81	contour137	Speech	0	0
14	92	0,554	diff	diff	CORRECT	81	contour049	Song	2.0279	2.0279
14	105	0,872	diff	diff	CORRECT	81	contour053	Speech	1.20203	1.20203
14	111	1,458	same	diff	INCORRECT	81	contour017	Intermediate	-1.08046	1.08046
14	103	0,668	same	diff	INCORRECT	81	contour200	Intermediate	4.5219	4.5219
14	61	1,637	diff	diff	CORRECT	81	contour010	Intermediate	-5.39966	5.39966
14	42	2,707	same	diff	INCORRECT	81	contour155	Intermediate	1.81332	1.81332
14	29	0,924	diff	diff	CORRECT	81	contour162	Song	4.48308	4.48308
14	107	1,069	diff	diff	CORRECT	81	contour114	Intermediate	3.13285	3.13285
14	114	3,314	same	same	CORRECT	81	contour174	Speech	0	0
14	71	0,545	same	same	CORRECT	81	contour182	Speech	0	0
14	104	0,497	diff	diff	CORRECT	81	contour038	Speech	4.06729	4.06729
14	119	1,019	same	same	CORRECT	81	contour168	Song	0	0
14	55	1,142	same	diff	INCORRECT	81	contour165	Speech	-1.46132	1.46132
14	80	0,901	same	diff	INCORRECT	81	contour174	Song	1.10675	1.10675
14	84	0,907	same	same	CORRECT	81	contour037	Intermediate	0	0
14	62	1,295	same	same	CORRECT	81	contour083	Song	0	0
14	3	0,988	same	same	CORRECT	81	contour003	Song	0	0
14	14	0,959	same	diff	INCORRECT	81	contour064	Intermediate	-5.25313	5.25313
14	88	1,469	same	same	CORRECT	81	contour077	Speech	0	0
14	33	1,764	same	same	CORRECT	81	contour039	Song	0	0
14	95	1,501	same	same	CORRECT	81	contour035	Song	0	0
14	83	0,551	same	diff	INCORRECT	81	contour171	Speech	2.51472	2.51472
14	31	1,17	same	same	CORRECT	81	contour106	Song	0	0
14	67	0,771	diff	diff	CORRECT	81	contour039	Speech	-3.87441	3.87441
14	8	1,528	same	same	CORRECT	81	contour155	Song	0	0
14	32	0,978	same	same	CORRECT	81	contour011	Intermediate	0	0
14	18	0,886	same	diff	INCORRECT	81	contour010	Song	1.88078	1.88078
14	5	0,827	diff	diff	CORRECT	81	contour095	Intermediate	4.04506	4.04506
14	100	1,343	same	same	CORRECT	81	contour042	Speech	0	0
14	37	1,207	diff	diff	CORRECT	81	contour025	Speech	-4.50184	4.50184
14	99	0,803	diff	diff	CORRECT	81	contour155	Speech	-3.07571	3.07571
14	50	0,631	same	same	CORRECT	81	contour174	Intermediate	0	0
14	86	1,439	diff	diff	CORRECT	81	contour182	Song	-1.22359	1.22359
14	57	0,799	same	same	CORRECT	81	contour189	Speech	0	0
14	102	1,252	diff	same	INCORRECT	81	contour011	Song	0	0
14	82	0,767	same	diff	INCORRECT	81	contour003	Speech	4.25884	4.25884
14	74	0,59	diff	diff	CORRECT	81	contour064	Song	-5.2574	5.2574
14	90	0,764	same	same	CORRECT	81	contour168	Speech	0	0
14	75	0,874	same	same	CORRECT	81	contour032	Song	0	0
14	24	0,603	same	diff	INCORRECT	81	contour049	Intermediate	4.54933	4.54933
14	47	1,066	same	same	CORRECT	81	contour016	Song	0	0
14	2	0,858	diff	diff	CORRECT	81	contour200	Song	-4.76772	4.76772
14	79	2,266	diff	diff	CORRECT	81	contour017	Speech	4.43206	4.43206
14	81	1,455	same	same	CORRECT	81	contour042	Intermediate	0	0
14	6	0,472	diff	diff	CORRECT	81	contour123	Intermediate	-3.93938	3.93938
14	30	0,918	same	same	CORRECT	81	contour171	Song	0	0
14	91	1,102	same	diff	INCORRECT	81	contour161	Speech	3.58032	3.58032
14	116	0,744	same	diff	INCORRECT	81	contour137	Song	1.9048	1.9048
14	16	1,265	diff	same	INCORRECT	81	contour004	Intermediate	0	0
14	115	1,209	diff	same	INCORRECT	81	contour053	Intermediate	0	0
14	27	0,851	same	same	CORRECT	81	contour153	Speech	0	0
14	45	0,859	diff	diff	CORRECT	81	contour025	Intermediate	2.07753	2.07753
14	9	0,576	diff	diff	CORRECT	81	contour038	Intermediate	2.06174	2.06174
14	13	1,247	same	same	CORRECT	81	contour153	Intermediate	0	0
14	52	0,775	diff	diff	CORRECT	81	contour032	Speech	-1.34554	1.34554
14	17	0,776	same	same	CORRECT	81	contour039	Intermediate	0	0
14	20	2,089	same	diff	INCORRECT	81	contour161	Song	1.99204	1.99204
15	79	1,792	same	same	CORRECT	65	contour039	Intermediate	0	0
15	90	1,205	same	diff	INCORRECT	65	contour171	Speech	2.51472	2.51472
15	53	1,523	diff	same	INCORRECT	65	contour182	Intermediate	0	0
15	91	0,945	diff	diff	CORRECT	65	contour174	Song	1.10675	1.10675
15	113	1,198	diff	diff	CORRECT	65	contour053	Speech	1.20203	1.20203
15	12	1,79	same	same	CORRECT	65	contour153	Song	0	0
15	9	0,932	diff	diff	CORRECT	65	contour038	Song	-2.87033	2.87033
15	49	1,163	same	diff	INCORRECT	65	contour200	Intermediate	4.5219	4.5219
15	38	1,3	diff	diff	CORRECT	65	contour017	Song	4.42381	4.42381
15	42	1,516	diff	same	INCORRECT	65	contour010	Speech	0	0
15	105	1,475	same	same	CORRECT	65	contour161	Intermediate	0	0
15	62	0,777	diff	diff	CORRECT	65	contour025	Song	1.98477	1.98477
15	111	0,746	diff	diff	CORRECT	65	contour099	Intermediate	2.83506	2.83506
15	92	1,421	diff	diff	CORRECT	65	contour083	Intermediate	-2.83781	2.83781
15	75	0,93	same	same	CORRECT	65	contour164	Speech	0	0
15	69	1,221	same	diff	INCORRECT	65	contour037	Speech	-1.42611	1.42611
15	99	1,376	diff	diff	CORRECT	65	contour053	Intermediate	1.81508	1.81508
15	65	1,955	same	diff	INCORRECT	65	contour162	Song	4.48308	4.48308
15	95	1,616	same	same	CORRECT	65	contour153	Intermediate	0	0
15	15	1,365	diff	same	INCORRECT	65	contour200	Song	0	0
15	35	1,066	diff	diff	CORRECT	65	contour075	Song	-2.69624	2.69624
15	110	1,356	same	same	CORRECT	65	contour182	Song	0	0
15	119	0,875	diff	diff	CORRECT	65	contour038	Speech	4.06729	4.06729
15	3	1,418	diff	diff	CORRECT	65	contour099	Speech	-3.88002	3.88002
15	94	3,062	same	same	CORRECT	65	contour106	Intermediate	0	0
15	47	2,815	diff	diff	CORRECT	65	contour025	Speech	-4.50184	4.50184
15	13	1,012	diff	diff	CORRECT	65	contour114	Song	3.57851	3.57851
15	52	1,676	diff	same	INCORRECT	65	contour165	Song	0	0
15	28	1,262	same	same	CORRECT	65	contour038	Intermediate	0	0
15	61	1,35	diff	diff	CORRECT	65	contour152	Intermediate	-5.55534	5.55534
15	73	1,345	same	same	CORRECT	65	contour137	Speech	0	0
15	41	1,368	diff	same	INCORRECT	65	contour123	Song	0	0
15	101	1,285	diff	diff	CORRECT	65	contour167	Intermediate	-3.43158	3.43158
15	98	2,125	same	same	CORRECT	65	contour064	Speech	0	0
15	0	1,414	same	same	CORRECT	65	contour171	Song	0	0
15	30	1,301	diff	diff	CORRECT	65	contour162	Intermediate	-2.75832	2.75832
15	74	1,104	diff	same	INCORRECT	65	contour114	Speech	0	0
15	32	1,795	same	same	CORRECT	65	contour039	Speech	0	0
15	96	1,681	diff	same	INCORRECT	65	contour152	Song	0	0
15	67	1,11	diff	diff	CORRECT	65	contour168	Intermediate	1.46788	1.46788
15	14	1,066	diff	diff	CORRECT	65	contour064	Intermediate	-5.25313	5.25313
15	83	1,352	diff	diff	CORRECT	65	contour053	Song	-2.40718	2.40718
15	22	1,542	diff	diff	CORRECT	65	contour075	Speech	-2.1487	2.1487
15	29	1,491	same	diff	INCORRECT	65	contour003	Speech	4.25884	4.25884
15	21	1,431	diff	same	INCORRECT	65	contour016	Song	0	0
15	71	1,698	same	diff	INCORRECT	65	contour164	Song	3.74949	3.74949
15	66	1,39	diff	diff	CORRECT	65	contour133	Song	4.57916	4.57916
15	34	1,769	diff	diff	CORRECT	65	contour152	Speech	5.67649	5.67649
15	17	1,686	same	same	CORRECT	65	contour171	Intermediate	0	0
15	58	1,386	diff	diff	CORRECT	65	contour168	Song	-2.66717	2.66717
15	102	2,08	same	same	CORRECT	65	contour047	Song	0	0
15	2	1,54	diff	diff	CORRECT	65	contour162	Speech	5.59484	5.59484
15	87	2,229	same	diff	INCORRECT	65	contour037	Intermediate	1.85345	1.85345
15	54	1,284	diff	diff	CORRECT	65	contour164	Intermediate	-1.96033	1.96033
15	70	2,827	same	same	CORRECT	65	contour039	Song	0	0
15	48	1,534	diff	same	INCORRECT	65	contour099	Song	0	0
15	4	2,118	same	diff	INCORRECT	65	contour049	Intermediate	4.54933	4.54933
15	108	2,033	diff	same	INCORRECT	65	contour017	Speech	0	0
15	19	1,1	diff	diff	CORRECT	65	contour174	Speech	4.26269	4.26269
15	109	1,345	diff	same	INCORRECT	65	contour010	Song	0	0
15	77	2,001	same	diff	INCORRECT	65	contour106	Speech	-2.1815	2.1815
15	51	1,164	diff	diff	CORRECT	65	contour095	Intermediate	4.04506	4.04506
15	18	1,006	diff	same	INCORRECT	65	contour163	Song	0	0
15	106	1,336	diff	same	INCORRECT	65	contour047	Speech	0	0
15	59	1,661	same	same	CORRECT	65	contour017	Intermediate	0	0
15	40	1,843	diff	diff	CORRECT	65	contour032	Song	-1.73502	1.73502
15	57	0,789	diff	same	INCORRECT	65	contour130	Song	0	0
15	10	0,862	diff	diff	CORRECT	65	contour049	Speech	1.4765	1.4765
15	104	1,374	same	same	CORRECT	65	contour200	Speech	0	0
15	43	1,262	diff	diff	CORRECT	65	contour130	Intermediate	5.54485	5.54485
15	89	1,188	diff	same	INCORRECT	65	contour165	Intermediate	0	0
15	16	1,214	same	same	CORRECT	65	contour161	Speech	0	0
15	118	1,208	diff	diff	CORRECT	65	contour042	Intermediate	-2.78707	2.78707
15	27	1,299	same	diff	INCORRECT	65	contour167	Speech	3.67715	3.67715
15	93	1,899	same	same	CORRECT	65	contour042	Speech	0	0
15	78	1,291	same	same	CORRECT	65	contour037	Song	0	0
15	20	1,707	same	same	CORRECT	65	contour161	Song	0	0
15	37	2,321	same	same	CORRECT	65	contour042	Song	0	0
15	25	1,111	same	same	CORRECT	65	contour083	Song	0	0
15	116	1,783	same	same	CORRECT	65	contour077	Speech	0	0
15	23	2,829	diff	same	INCORRECT	65	contour114	Intermediate	0	0
15	72	0,861	diff	same	INCORRECT	65	contour182	Speech	0	0
15	68	1,429	same	same	CORRECT	65	contour095	Speech	0	0
15	55	0,914	diff	diff	CORRECT	65	contour133	Intermediate	3.14672	3.14672
15	81	2,084	diff	diff	CORRECT	65	contour077	Song	3.95768	3.95768
15	6	1,051	diff	same	INCORRECT	65	contour004	Intermediate	0	0
15	115	2,398	same	same	CORRECT	65	contour016	Intermediate	0	0
15	86	1,408	diff	same	INCORRECT	65	contour047	Intermediate	0	0
15	45	1,639	same	same	CORRECT	65	contour123	Intermediate	0	0
15	60	1,823	diff	diff	CORRECT	65	contour077	Intermediate	5.65269	5.65269
15	103	1,861	diff	diff	CORRECT	65	contour049	Song	2.0279	2.0279
15	82	1,72	diff	diff	CORRECT	65	contour155	Song	-5.24018	5.24018
15	84	1,116	diff	diff	CORRECT	65	contour174	Intermediate	-3.7986	3.7986
15	1	0,798	same	diff	INCORRECT	65	contour095	Song	2.67127	2.67127
15	33	1,738	diff	same	INCORRECT	65	contour075	Intermediate	0	0
15	112	1,431	diff	diff	CORRECT	65	contour003	Intermediate	4.60981	4.60981
15	63	1,824	diff	diff	CORRECT	65	contour133	Speech	4.13349	4.13349
15	31	0,97	diff	same	INCORRECT	65	contour032	Intermediate	0	0
15	24	1,141	diff	diff	CORRECT	65	contour165	Speech	-1.46132	1.46132
15	56	1,117	same	same	CORRECT	65	contour032	Speech	0	0
15	26	1,555	same	diff	INCORRECT	65	contour003	Song	4.82641	4.82641
15	64	2,35	diff	same	INCORRECT	65	contour083	Speech	0	0
15	36	1,158	diff	same	INCORRECT	65	contour025	Intermediate	0	0
15	44	3,965	same	same	CORRECT	65	contour137	Intermediate	0	0
15	39	1,678	diff	same	INCORRECT	65	contour137	Song	0	0
15	11	1,751	diff	diff	CORRECT	65	contour123	Speech	-2.54352	2.54352
15	76	1,6	diff	diff	CORRECT	65	contour155	Speech	-3.07571	3.07571
15	5	1,76	diff	same	INCORRECT	65	contour163	Intermediate	0	0
15	85	1,756	same	same	CORRECT	65	contour153	Speech	0	0
15	114	1,47	diff	diff	CORRECT	65	contour168	Speech	3.1411	3.1411
15	88	1,503	diff	diff	CORRECT	65	contour130	Speech	5.6717	5.6717
15	50	1,228	diff	diff	CORRECT	65	contour167	Song	2.85269	2.85269
15	117	1,672	same	diff	INCORRECT	65	contour106	Song	1.27951	1.27951
15	107	1,805	diff	diff	CORRECT	65	contour064	Song	-5.2574	5.2574
15	8	2,371	same	same	CORRECT	65	contour004	Speech	0	0
15	7	1,992	same	same	CORRECT	65	contour016	Speech	0	0
15	100	1,704	diff	diff	CORRECT	65	contour010	Intermediate	-5.39966	5.39966
15	46	1,699	diff	same	INCORRECT	65	contour155	Intermediate	0	0
15	80	1,883	same	same	CORRECT	65	contour163	Speech	0	0
15	97	1,82	same	same	CORRECT	65	contour004	Song	0	0
16	17	1,911	same	same	CORRECT	49	contour083	Song	0	0
16	101	2,019	same	same	CORRECT	49	contour095	Song	0	0
16	108	1,753	same	same	CORRECT	49	contour165	Song	0	0
16	10	1,672	diff	same	INCORRECT	49	contour200	Speech	0	0
16	55	3,081	same	diff	INCORRECT	49	contour189	Speech	-1.93467	1.93467
16	58	2,121	diff	diff	CORRECT	49	contour047	Speech	3.64892	3.64892
16	88	1,81	diff	diff	CORRECT	49	contour053	Song	-2.40718	2.40718
16	49	1,872	diff	same	INCORRECT	49	contour167	Song	0	0
16	115	2,295	same	same	CORRECT	49	contour039	Song	0	0
16	39	1,556	same	diff	INCORRECT	49	contour083	Speech	-1.4467	1.4467
16	56	3,087	same	diff	INCORRECT	49	contour099	Speech	-3.88002	3.88002
16	78	1,509	same	diff	INCORRECT	49	contour004	Speech	2.24009	2.24009
16	73	2,212	same	same	CORRECT	49	contour161	Speech	0	0
16	18	1,731	same	same	CORRECT	49	contour042	Intermediate	0	0
16	14	3,072	same	diff	INCORRECT	49	contour083	Intermediate	-2.83781	2.83781
16	82	1,017	diff	same	INCORRECT	49	contour171	Intermediate	0	0
16	3	1,995	same	diff	INCORRECT	49	contour164	Song	3.74949	3.74949
16	70	2,979	diff	same	INCORRECT	49	contour049	Intermediate	0	0
16	109	0,856	diff	diff	CORRECT	49	contour130	Song	3.34162	3.34162
16	50	1,101	same	same	CORRECT	49	contour003	Song	0	0
16	4	1,078	same	diff	INCORRECT	49	contour123	Song	-2.82473	2.82473
16	54	2,862	diff	same	INCORRECT	49	contour038	Speech	0	0
16	16	1,883	same	same	CORRECT	49	contour064	Intermediate	0	0
16	25	1,133	same	diff	INCORRECT	49	contour049	Song	2.0279	2.0279
16	76	1,798	same	same	CORRECT	49	contour017	Speech	0	0
16	36	1,313	same	same	CORRECT	49	contour078	Song	0	0
16	64	1,212	same	diff	INCORRECT	49	contour137	Speech	4.0314	4.0314
16	34	1,453	same	diff	INCORRECT	49	contour106	Song	1.27951	1.27951
16	53	2,374	same	same	CORRECT	49	contour133	Intermediate	0	0
16	60	3,849	diff	same	INCORRECT	49	contour155	Song	0	0
16	23	2,552	same	same	CORRECT	49	contour099	Song	0	0
16	43	1,013	same	same	CORRECT	49	contour053	Intermediate	0	0
16	11	2,67	same	same	CORRECT	49	contour189	Song	0	0
16	116	1,096	diff	same	INCORRECT	49	contour168	Speech	0	0
16	42	1,483	same	diff	INCORRECT	49	contour016	Intermediate	-2.04804	2.04804
16	12	1,9	diff	same	INCORRECT	49	contour003	Intermediate	0	0
16	5	1,279	diff	diff	CORRECT	49	contour025	Song	1.98477	1.98477
16	1	1,879	same	same	CORRECT	49	contour130	Speech	0	0
16	104	1,101	same	same	CORRECT	49	contour155	Speech	0	0
16	6	0,838	same	diff	INCORRECT	49	contour137	Intermediate	3.11261	3.11261
16	62	9,117	same	same	CORRECT	49	contour064	Speech	0	0
16	22	1,333	diff	diff	CORRECT	49	contour133	Speech	4.13349	4.13349
16	94	1,874	same	same	CORRECT	49	contour161	Intermediate	0	0
16	44	2,52	diff	diff	CORRECT	49	contour155	Intermediate	1.81332	1.81332
16	41	0,928	same	same	CORRECT	49	contour163	Song	0	0
16	19	1,822	same	same	CORRECT	49	contour161	Song	0	0
16	102	1,734	same	same	CORRECT	49	contour038	Song	0	0
16	71	3,604	same	diff	INCORRECT	49	contour153	Song	1.47389	1.47389
16	48	2,057	same	diff	INCORRECT	49	contour064	Song	-5.2574	5.2574
16	13	2,105	same	diff	INCORRECT	49	contour011	Speech	1.34502	1.34502
16	27	2,13	same	same	CORRECT	49	contour106	Speech	0	0
16	66	1,423	diff	diff	CORRECT	49	contour016	Speech	2.80436	2.80436
16	38	1,88	diff	diff	CORRECT	49	contour152	Intermediate	-5.55534	5.55534
16	46	2,43	same	diff	INCORRECT	49	contour049	Speech	1.4765	1.4765
16	112	2,569	same	same	CORRECT	49	contour189	Intermediate	0	0
16	35	3,365	diff	same	INCORRECT	49	contour077	Speech	0	0
16	69	1,177	same	same	CORRECT	49	contour003	Speech	0	0
16	8	1,048	same	same	CORRECT	49	contour200	Intermediate	0	0
16	28	1,711	diff	diff	CORRECT	49	contour133	Song	4.57916	4.57916
16	51	2,214	same	same	CORRECT	49	contour182	Speech	0	0
16	47	1,951	diff	diff	CORRECT	49	contour182	Intermediate	-5.52258	5.52258
16	52	1,674	same	same	CORRECT	49	contour075	Speech	0	0
16	2	0,911	diff	diff	CORRECT	49	contour077	Intermediate	5.65269	5.65269
16	83	1,147	same	same	CORRECT	49	contour095	Intermediate	0	0
16	59	2,22	same	same	CORRECT	49	contour167	Speech	0	0
16	63	1,881	diff	diff	CORRECT	49	contour025	Intermediate	2.07753	2.07753
16	96	1,203	same	same	CORRECT	49	contour165	Speech	0	0
16	110	2,029	same	diff	INCORRECT	49	contour004	Intermediate	3.95277	3.95277
16	119	1,225	diff	same	INCORRECT	49	contour152	Song	0	0
16	81	1,319	same	same	CORRECT	49	contour200	Song	0	0
16	79	3,687	same	same	CORRECT	49	contour047	Song	0	0
16	26	1,658	same	same	CORRECT	49	contour165	Intermediate	0	0
16	84	1,729	diff	same	INCORRECT	49	contour017	Intermediate	0	0
16	91	2,278	same	diff	INCORRECT	49	contour106	Intermediate	1.33333	1.33333
16	33	0,89	diff	diff	CORRECT	49	contour168	Song	-2.66717	2.66717
16	95	0,808	same	diff	INCORRECT	49	contour053	Speech	1.20203	1.20203
16	103	0,986	same	diff	INCORRECT	49	contour042	Speech	3.02936	3.02936
16	57	1,22	same	diff	INCORRECT	49	contour153	Intermediate	3.77205	3.77205
16	30	1,192	same	diff	INCORRECT	49	contour025	Speech	-4.50184	4.50184
16	7	1,014	same	same	CORRECT	49	contour167	Intermediate	0	0
16	45	1,588	same	diff	INCORRECT	49	contour123	Speech	-2.54352	2.54352
16	77	2,028	same	diff	INCORRECT	49	contour016	Song	-1.27547	1.27547
16	31	1,362	same	same	CORRECT	49	contour137	Song	0	0
16	113	2,172	same	diff	INCORRECT	49	contour114	Speech	-1.52123	1.52123
16	37	1,459	same	same	CORRECT	49	contour114	Intermediate	0	0
16	118	2,28	same	same	CORRECT	49	contour123	Intermediate	0	0
16	106	1,594	same	diff	INCORRECT	49	contour171	Speech	2.51472	2.51472
16	111	2,327	same	diff	INCORRECT	49	contour163	Intermediate	1.38397	1.38397
16	97	1,735	diff	same	INCORRECT	49	contour032	Speech	0	0
16	107	1,099	same	diff	INCORRECT	49	contour039	Intermediate	-1.88056	1.88056
16	87	2,137	same	diff	INCORRECT	49	contour130	Intermediate	5.54485	5.54485
16	90	1,688	same	same	CORRECT	49	contour164	Intermediate	0	0
16	99	1,288	same	diff	INCORRECT	49	contour032	Intermediate	-2.79765	2.79765
16	75	2,093	same	diff	INCORRECT	49	contour182	Song	-1.22359	1.22359
16	40	2,093	same	diff	INCORRECT	49	contour095	Speech	-1.59891	1.59891
16	98	1,853	same	same	CORRECT	49	contour039	Speech	0	0
16	74	1,677	diff	diff	CORRECT	49	contour017	Song	4.42381	4.42381
16	32	1,075	same	diff	INCORRECT	49	contour032	Song	-1.73502	1.73502
16	85	1,65	same	diff	INCORRECT	49	contour171	Song	-5.73783	5.73783
16	89	1,544	same	same	CORRECT	49	contour035	Song	0	0
16	68	1,594	same	diff	INCORRECT	49	contour078	Speech	4.01977	4.01977
16	100	1,756	same	diff	INCORRECT	49	contour038	Intermediate	2.06174	2.06174
16	93	1,498	same	same	CORRECT	49	contour153	Speech	0	0
16	65	1,344	diff	diff	CORRECT	49	contour099	Intermediate	2.83506	2.83506
16	21	1,438	same	diff	INCORRECT	49	contour163	Speech	2.18061	2.18061
16	15	0,933	same	diff	INCORRECT	49	contour035	Intermediate	1.49424	1.49424
16	117	0,926	same	same	CORRECT	49	contour011	Intermediate	0	0
16	20	1,725	same	diff	INCORRECT	49	contour042	Song	2.86156	2.86156
16	86	2,317	same	diff	INCORRECT	49	contour075	Song	-2.69624	2.69624
16	92	1,532	same	diff	INCORRECT	49	contour168	Intermediate	1.46788	1.46788
16	67	1,343	same	same	CORRECT	49	contour114	Song	0	0
16	9	1,083	same	diff	INCORRECT	49	contour077	Song	3.95768	3.95768
16	72	1,349	same	diff	INCORRECT	49	contour047	Intermediate	5.52934	5.52934
16	61	1,669	same	same	CORRECT	49	contour004	Song	0	0
16	105	1,126	diff	same	INCORRECT	49	contour164	Speech	0	0
16	0	0,571	same	same	CORRECT	49	contour078	Intermediate	0	0
16	80	1,547	same	diff	INCORRECT	49	contour011	Song	-4.46781	4.46781
16	114	0,846	diff	diff	CORRECT	49	contour152	Speech	5.67649	5.67649
16	24	1,211	same	same	CORRECT	49	contour075	Intermediate	0	0
16	29	1,033	diff	same	INCORRECT	49	contour035	Speech	0	0
17	114	1,28	same	same	CORRECT	63	contour106	Speech	0	0
17	64	1,061	diff	diff	CORRECT	63	contour095	Intermediate	4.04506	4.04506
17	81	1,061	diff	diff	CORRECT	63	contour042	Speech	3.02936	3.02936
17	106	1,571	same	same	CORRECT	63	contour189	Song	0	0
17	48	5,897	same	diff	INCORRECT	63	contour182	Song	-1.22359	1.22359
17	67	1,262	same	same	CORRECT	63	contour168	Song	0	0
17	69	3,84	diff	same	INCORRECT	63	contour004	Intermediate	0	0
17	49	0,793	same	same	CORRECT	63	contour174	Song	0	0
17	28	2,023	same	diff	INCORRECT	63	contour130	Song	3.34162	3.34162
17	33	0,77	diff	diff	CORRECT	63	contour003	Song	4.82641	4.82641
17	86	10,137	diff	diff	CORRECT	63	contour035	Intermediate	1.49424	1.49424
17	97	1,153	same	diff	INCORRECT	63	contour078	Intermediate	-5.31024	5.31024
17	11	0,722	same	same	CORRECT	63	contour167	Speech	0	0
17	30	2,154	diff	same	INCORRECT	63	contour168	Speech	0	0
17	17	1,084	diff	diff	CORRECT	63	contour037	Speech	-1.42611	1.42611
17	41	0,798	same	same	CORRECT	63	contour095	Speech	0	0
17	62	5,075	same	same	CORRECT	63	contour162	Speech	0	0
17	14	1,052	same	same	CORRECT	63	contour150	Intermediate	0	0
17	85	0,67	same	diff	INCORRECT	63	contour035	Song	1.98272	1.98272
17	75	0,848	same	same	CORRECT	63	contour114	Song	0	0
17	24	0,745	diff	diff	CORRECT	63	contour152	Intermediate	-5.55534	5.55534
17	56	1,077	same	same	CORRECT	63	contour095	Song	0	0
17	22	4,914	diff	diff	CORRECT	63	contour032	Song	-1.73502	1.73502
17	100	0,81	same	same	CORRECT	63	contour189	Intermediate	0	0
17	78	1,401	same	same	CORRECT	63	contour011	Speech	0	0
17	80	2,635	same	same	CORRECT	63	contour162	Intermediate	0	0
17	31	2,787	diff	diff	CORRECT	63	contour130	Speech	5.6717	5.6717
17	63	1,129	same	same	CORRECT	63	contour150	Speech	0	0
17	107	4,073	diff	same	INCORRECT	63	contour123	Intermediate	0	0
17	61	0,745	same	diff	INCORRECT	63	contour123	Speech	-2.54352	2.54352
17	102	0,976	diff	diff	CORRECT	63	contour011	Song	-4.46781	4.46781
17	13	0,866	same	same	CORRECT	63	contour077	Song	0	0
17	93	1,063	same	diff	INCORRECT	63	contour161	Intermediate	-2.79127	2.79127
17	82	0,938	same	same	CORRECT	63	contour053	Song	0	0
17	73	2,864	diff	diff	CORRECT	63	contour174	Speech	4.26269	4.26269
17	70	1,237	same	diff	INCORRECT	63	contour164	Intermediate	-1.96033	1.96033
17	79	2,203	same	diff	INCORRECT	63	contour161	Speech	3.58032	3.58032
17	88	0,983	same	same	CORRECT	63	contour163	Intermediate	0	0
17	50	2,66	same	diff	INCORRECT	63	contour171	Song	-5.73783	5.73783
17	3	3,52	diff	diff	CORRECT	63	contour167	Song	2.85269	2.85269
17	7	1,205	same	diff	INCORRECT	63	contour038	Intermediate	2.06174	2.06174
17	68	5,335	diff	diff	CORRECT	63	contour083	Song	2.21799	2.21799
17	91	1,13	same	same	CORRECT	63	contour078	Song	0	0
17	58	1,137	same	same	CORRECT	63	contour047	Intermediate	0	0
17	89	1,288	same	same	CORRECT	63	contour099	Song	0	0
17	54	1,078	same	same	CORRECT	63	contour152	Speech	0	0
17	38	1,18	same	same	CORRECT	63	contour064	Intermediate	0	0
17	118	0,842	same	same	CORRECT	63	contour064	Speech	0	0
17	98	2,712	diff	diff	CORRECT	63	contour164	Song	3.74949	3.74949
17	39	3,082	diff	diff	CORRECT	63	contour017	Speech	4.43206	4.43206
17	26	1,124	diff	diff	CORRECT	63	contour106	Song	1.27951	1.27951
17	46	1,011	same	same	CORRECT	63	contour152	Song	0	0
17	112	1,004	same	diff	INCORRECT	63	contour189	Speech	-1.93467	1.93467
17	16	1,538	diff	diff	CORRECT	63	contour077	Intermediate	5.65269	5.65269
17	60	1,224	same	same	CORRECT	63	contour167	Intermediate	0	0
17	15	4,512	same	same	CORRECT	63	contour200	Intermediate	0	0
17	1	1,891	same	diff	INCORRECT	63	contour171	Speech	2.51472	2.51472
17	77	1,514	diff	diff	CORRECT	63	contour032	Speech	-1.34554	1.34554
17	45	1,107	same	same	CORRECT	63	contour075	Song	0	0
17	21	1,141	diff	diff	CORRECT	63	contour037	Intermediate	1.85345	1.85345
17	8	1,213	same	same	CORRECT	63	contour017	Song	0	0
17	12	1,261	diff	diff	CORRECT	63	contour130	Intermediate	5.54485	5.54485
17	113	1,643	same	same	CORRECT	63	contour163	Song	0	0
17	72	0,667	same	same	CORRECT	63	contour064	Song	0	0
17	103	1,716	diff	diff	CORRECT	63	contour016	Song	-1.27547	1.27547
17	116	1,299	same	same	CORRECT	63	contour039	Song	0	0
17	6	1,103	same	diff	INCORRECT	63	contour106	Intermediate	1.33333	1.33333
17	10	1,388	same	diff	INCORRECT	63	contour137	Speech	4.0314	4.0314
17	87	0,787	same	same	CORRECT	63	contour025	Intermediate	0	0
17	5	0,953	diff	diff	CORRECT	63	contour075	Intermediate	4.92376	4.92376
17	37	3,961	same	same	CORRECT	63	contour099	Speech	0	0
17	96	1,134	same	same	CORRECT	63	contour016	Speech	0	0
17	84	1,518	diff	same	INCORRECT	63	contour011	Intermediate	0	0
17	92	1,412	diff	diff	CORRECT	63	contour200	Song	-4.76772	4.76772
17	40	1,665	same	same	CORRECT	63	contour035	Speech	0	0
17	111	1,122	same	same	CORRECT	63	contour053	Intermediate	0	0
17	94	1,06	same	diff	INCORRECT	63	contour182	Speech	5.8125	5.8125
17	44	0,827	same	diff	INCORRECT	63	contour161	Song	1.99204	1.99204
17	71	1,754	diff	same	INCORRECT	63	contour174	Intermediate	0	0
17	29	7,311	diff	diff	CORRECT	63	contour114	Speech	-1.52123	1.52123
17	110	1,215	diff	diff	CORRECT	63	contour004	Song	-5.19558	5.19558
17	53	1,207	same	diff	INCORRECT	63	contour078	Speech	4.01977	4.01977
17	59	0,989	diff	same	INCORRECT	63	contour168	Intermediate	0	0
17	74	2,222	diff	diff	CORRECT	63	contour042	Intermediate	-2.78707	2.78707
17	95	1,118	same	same	CORRECT	63	contour004	Speech	0	0
17	35	0,762	same	same	CORRECT	63	contour137	Song	0	0
17	51	0,793	same	same	CORRECT	63	contour025	Song	0	0
17	119	0,964	same	same	CORRECT	63	contour075	Speech	0	0
17	105	3,024	same	same	CORRECT	63	contour017	Intermediate	0	0
17	0	0,822	diff	diff	CORRECT	63	contour042	Song	2.86156	2.86156
17	25	0,939	same	diff	INCORRECT	63	contour083	Speech	-1.4467	1.4467
17	47	5,252	same	diff	INCORRECT	63	contour083	Intermediate	-2.83781	2.83781
17	19	0,871	same	same	CORRECT	63	contour016	Intermediate	0	0
17	101	2,151	same	diff	INCORRECT	63	contour039	Speech	-3.87441	3.87441
17	115	0,78	same	diff	INCORRECT	63	contour003	Speech	4.25884	4.25884
17	43	5,582	same	diff	INCORRECT	63	contour077	Speech	5.30815	5.30815
17	99	1,434	same	same	CORRECT	63	contour010	Intermediate	0	0
17	66	1,145	diff	diff	CORRECT	63	contour137	Intermediate	3.11261	3.11261
17	52	0,663	same	same	CORRECT	63	contour171	Intermediate	0	0
17	42	1,735	diff	same	INCORRECT	63	contour038	Speech	0	0
17	83	1,109	same	same	CORRECT	63	contour047	Speech	0	0
17	117	0,895	same	same	CORRECT	63	contour200	Speech	0	0
17	108	1,513	diff	same	INCORRECT	63	contour025	Speech	0	0
17	76	10,152	diff	diff	CORRECT	63	contour038	Song	-2.87033	2.87033
17	104	0,825	same	diff	INCORRECT	63	contour032	Intermediate	-2.79765	2.79765
17	36	1,539	diff	diff	CORRECT	63	contour114	Intermediate	3.13285	3.13285
17	4	1,598	same	diff	INCORRECT	63	contour163	Speech	2.18061	2.18061
17	109	1,484	same	same	CORRECT	63	contour039	Intermediate	0	0
17	27	4,239	diff	same	INCORRECT	63	contour053	Speech	0	0
17	9	5,631	same	diff	INCORRECT	63	contour037	Song	1.82828	1.82828
17	34	1,13	diff	diff	CORRECT	63	contour182	Intermediate	-5.52258	5.52258
17	18	0,742	same	diff	INCORRECT	63	contour164	Speech	2.48791	2.48791
17	55	1,613	same	diff	INCORRECT	63	contour099	Intermediate	2.83506	2.83506
17	57	1,032	same	same	CORRECT	63	contour162	Song	0	0
17	2	2,137	diff	diff	CORRECT	63	contour150	Song	-4.73544	4.73544
17	20	2,901	same	same	CORRECT	63	contour010	Speech	0	0
17	23	1,372	same	same	CORRECT	63	contour123	Song	0	0
17	65	3,142	diff	diff	CORRECT	63	contour003	Intermediate	4.60981	4.60981
17	90	1,118	same	diff	INCORRECT	63	contour010	Song	1.88078	1.88078
17	32	1,708	diff	same	INCORRECT	63	contour047	Song	0	0
18	93	1,402	diff	diff	CORRECT	86	contour130	Intermediate	5.54485	5.54485
18	77	2,729	same	same	CORRECT	86	contour133	Speech	0	0
18	60	1,182	same	diff	INCORRECT	86	contour189	Song	5.26882	5.26882
18	67	6,249	same	same	CORRECT	86	contour053	Song	0	0
18	0	9,123	same	diff	INCORRECT	86	contour167	Song	2.85269	2.85269
18	110	0,829	diff	diff	CORRECT	86	contour053	Speech	1.20203	1.20203
18	37	0,928	diff	diff	CORRECT	86	contour038	Speech	4.06729	4.06729
18	11	1,05	same	diff	INCORRECT	86	contour038	Intermediate	2.06174	2.06174
18	92	1,012	diff	diff	CORRECT	86	contour077	Intermediate	5.65269	5.65269
18	65	1,621	same	same	CORRECT	86	contour155	Song	0	0
18	61	1,202	same	diff	INCORRECT	86	contour049	Intermediate	4.54933	4.54933
18	58	1,233	diff	diff	CORRECT	86	contour150	Song	-4.73544	4.73544
18	35	1,569	same	same	CORRECT	86	contour106	Speech	0	0
18	59	0,972	same	same	CORRECT	86	contour039	Intermediate	0	0
18	50	3,011	diff	diff	CORRECT	86	contour165	Speech	-1.46132	1.46132
18	64	1,329	same	diff	INCORRECT	86	contour200	Intermediate	4.5219	4.5219
18	69	1,269	same	same	CORRECT	86	contour182	Intermediate	0	0
18	81	1,171	same	same	CORRECT	86	contour032	Intermediate	0	0
18	63	1,15	diff	diff	CORRECT	86	contour167	Intermediate	-3.43158	3.43158
18	15	0,862	diff	diff	CORRECT	86	contour155	Speech	-3.07571	3.07571
18	113	1,591	same	same	CORRECT	86	contour003	Intermediate	0	0
18	36	0,823	same	same	CORRECT	86	contour123	Song	0	0
18	38	1,426	same	same	CORRECT	86	contour010	Speech	0	0
18	86	1,662	same	diff	INCORRECT	86	contour039	Speech	-3.87441	3.87441
18	12	1,835	same	same	CORRECT	86	contour150	Intermediate	0	0
18	45	0,872	same	same	CORRECT	86	contour049	Speech	0	0
18	89	0,997	same	diff	INCORRECT	86	contour163	Song	1.29428	1.29428
18	96	1,242	same	diff	INCORRECT	86	contour010	Song	1.88078	1.88078
18	44	1,807	diff	diff	CORRECT	86	contour037	Song	1.82828	1.82828
18	117	3,205	same	diff	INCORRECT	86	contour032	Speech	-1.34554	1.34554
18	31	0,84	diff	diff	CORRECT	86	contour042	Intermediate	-2.78707	2.78707
18	14	1,457	same	same	CORRECT	86	contour042	Speech	0	0
18	32	1,185	diff	same	INCORRECT	86	contour153	Song	0	0
18	100	1,538	same	same	CORRECT	86	contour047	Song	0	0
18	52	1,097	same	same	CORRECT	86	contour174	Speech	0	0
18	70	1,393	same	same	CORRECT	86	contour025	Song	0	0
18	51	1,019	same	diff	INCORRECT	86	contour039	Song	2.75129	2.75129
18	28	1,488	diff	same	INCORRECT	86	contour035	Intermediate	0	0
18	19	3,511	same	same	CORRECT	86	contour011	Intermediate	0	0
[truncated: 441 more rows]
